# Supplementary material for: Magnesium catalyzed [3 + 3] heteroannulation of α-enolic dithioesters with MBH acetate: access to functionalized 3,4-dihydro-2H-thiopyrans
Source: Royal Society of Chemistry journal article supplement (doi:10.1039/d2ob01258h), 2022-01-01
Supplement: d2ob01258h2.pdf [file d2ob01258h2.pdf]

## Supporting Information

# **Magnesium Catalyzed [3+3] Heteroannulation of $\alpha$ -Enolic dithioesters with MBH Acetate: Access to Functionalized 3,4-Dihydro-2H-thiopyrans**

Sonam Soni, Gaurav Shukla, and Maya Shankar Singh\*

\*Department of Chemistry, Institute of Science, Banaras Hindu University, Varanasi 221005, India

### **Table of Contents**

|                                                                                |      |
|--------------------------------------------------------------------------------|------|
| 1. Representative $^1\text{H}$ , $^{13}\text{C}$ , DEPT, COSY and HRMS Spectra | S2   |
| 2. Crystal Data of <b>6l</b> and <b>6i</b>                                     | S95  |
| 3. Quantum Chemical Calculations                                               | S116 |
| 4. References                                                                  | S132 |

**Representative  $^1\text{H}$ ,  $^{13}\text{C}\{^1\text{H}\}$ , DEPT, COSY and HRMS Spectra**

# 1. <sup>1</sup>H (500 MHz, CDCl<sub>3</sub>) and <sup>13</sup>C(<sup>1</sup>H) (125 MHz, CDCl<sub>3</sub>) NMR of Compound 3a

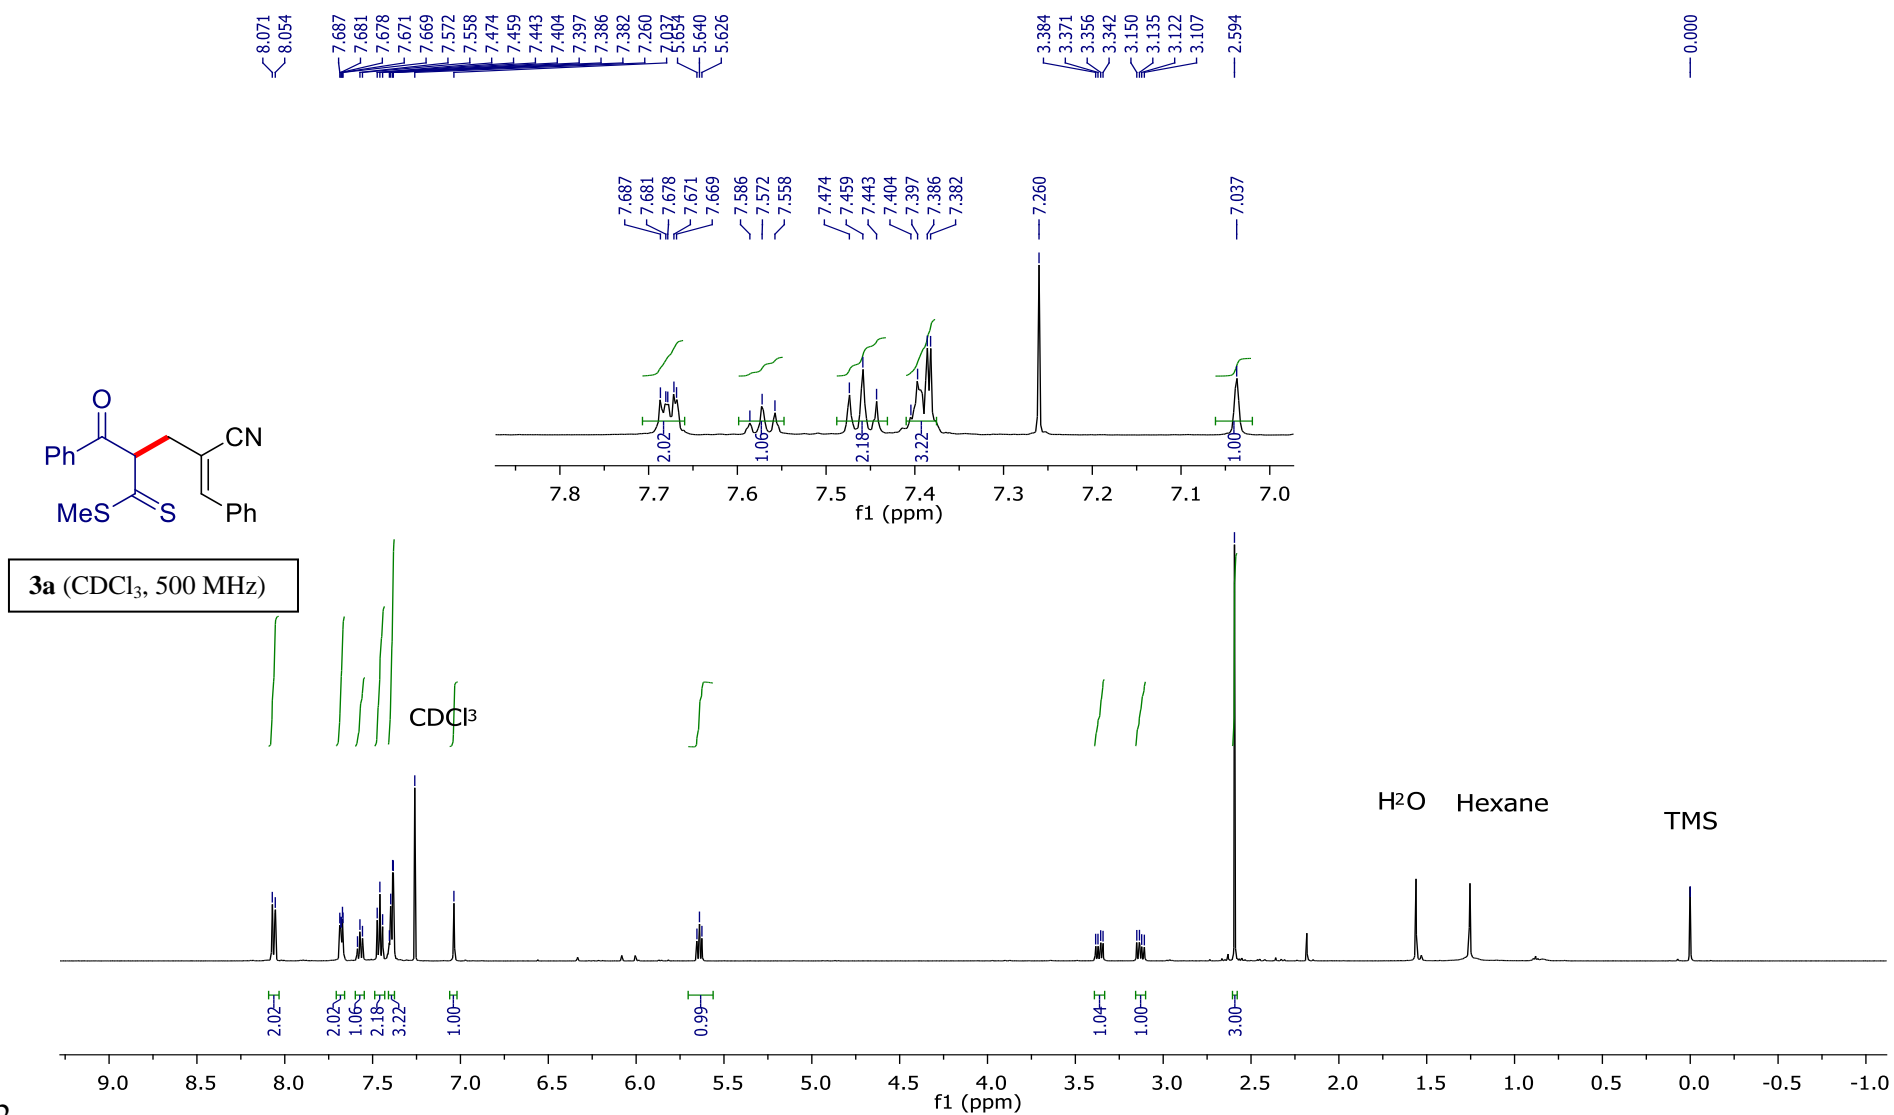

2.

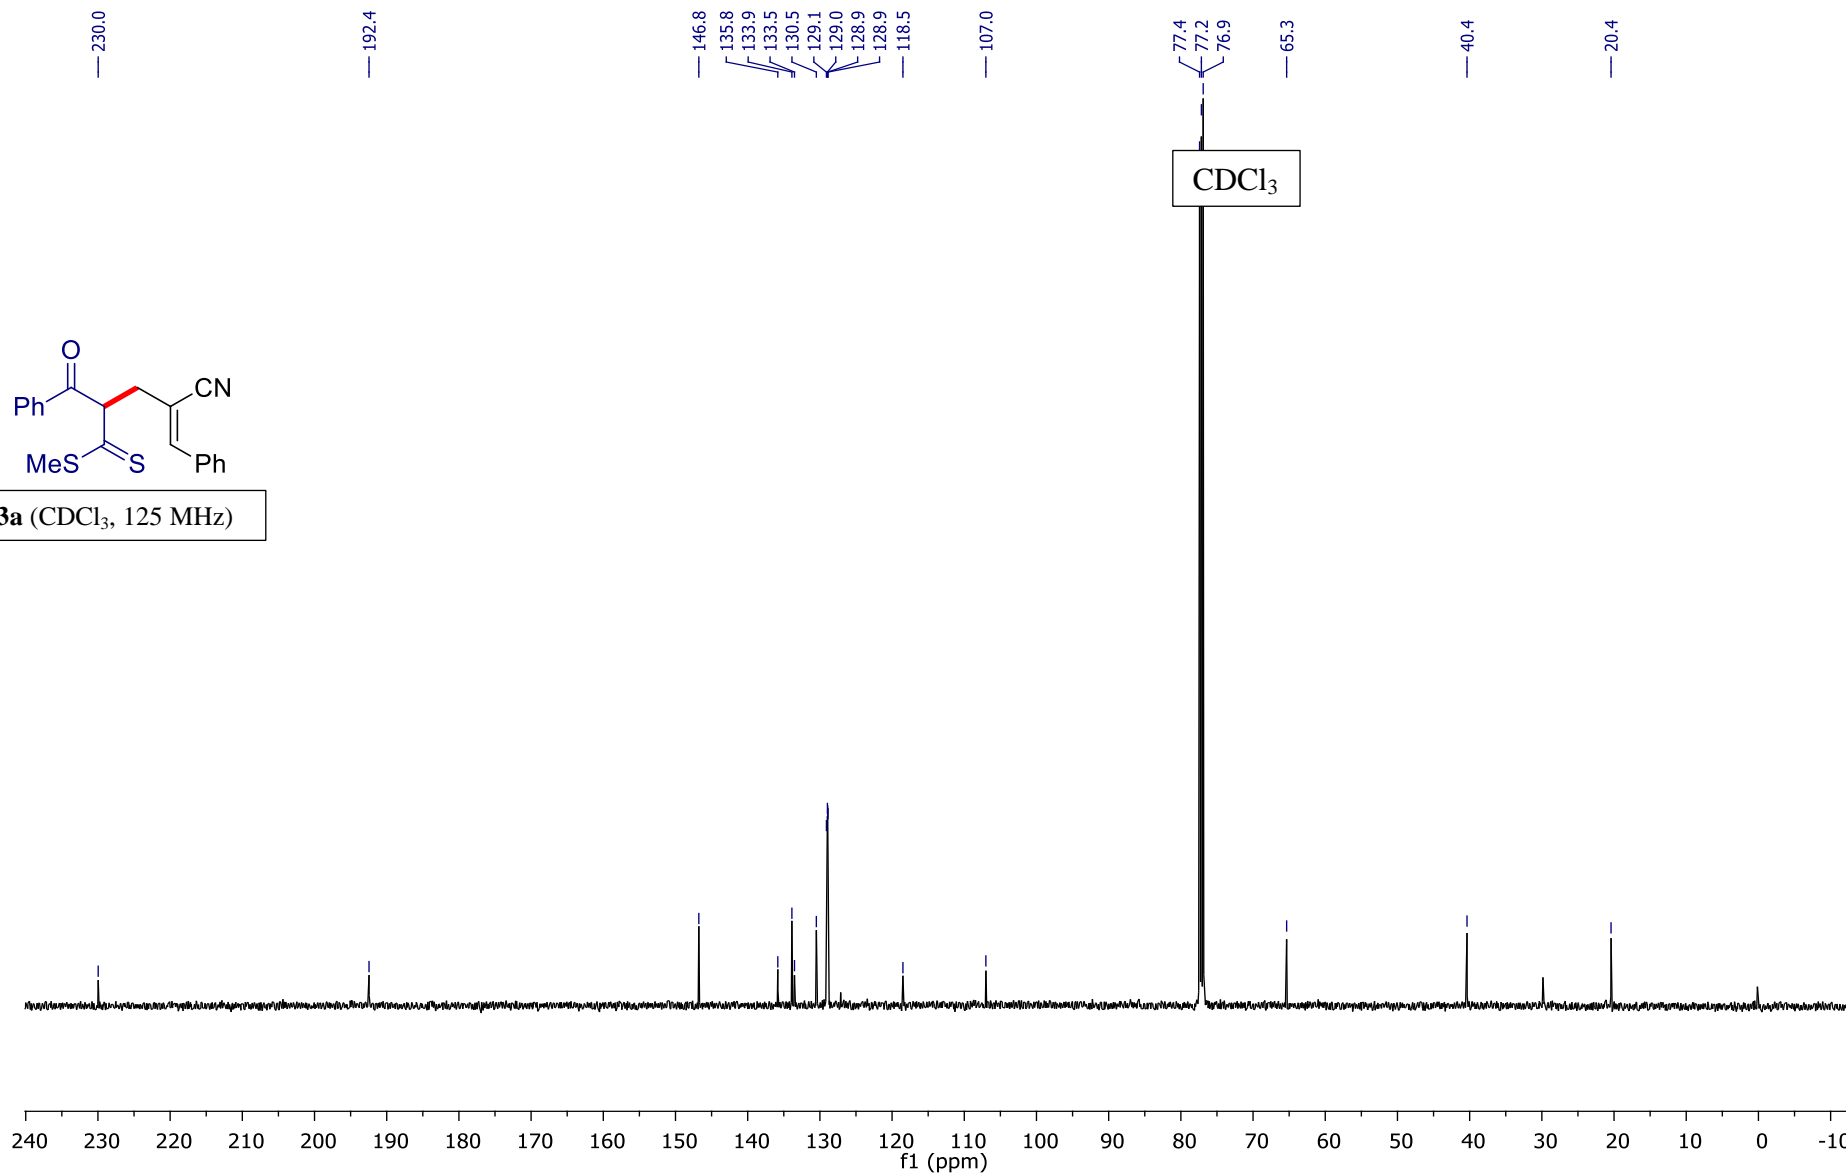

3.



4.  $^1\text{H}$  (500 MHz,  $\text{CDCl}_3$ ) and  $^{13}\text{C}$  ( $^1\text{H}$ ) (125 MHz,  $\text{CDCl}_3$ ) NMR of Compound 5a

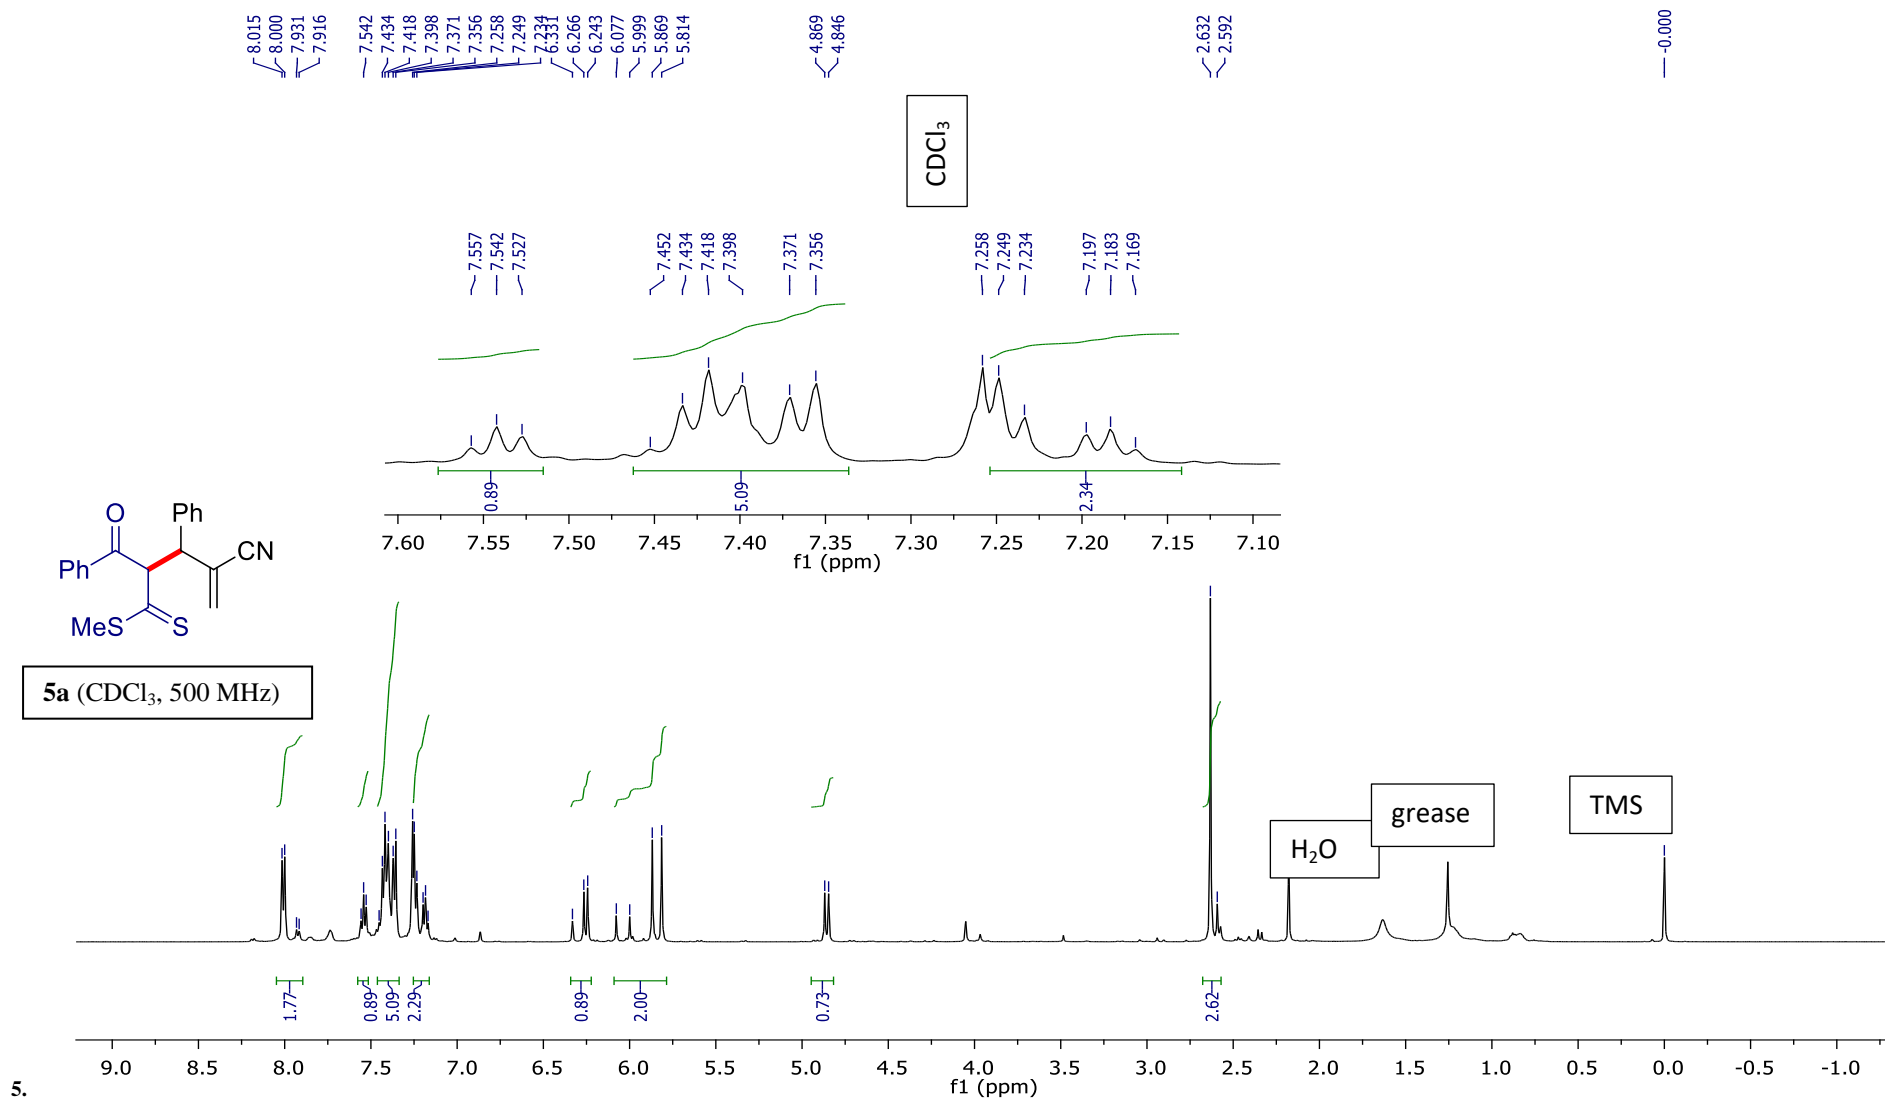

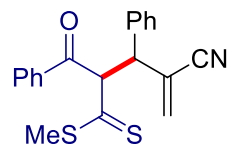

5a (CDCl<sub>3</sub>, 125 MHz)

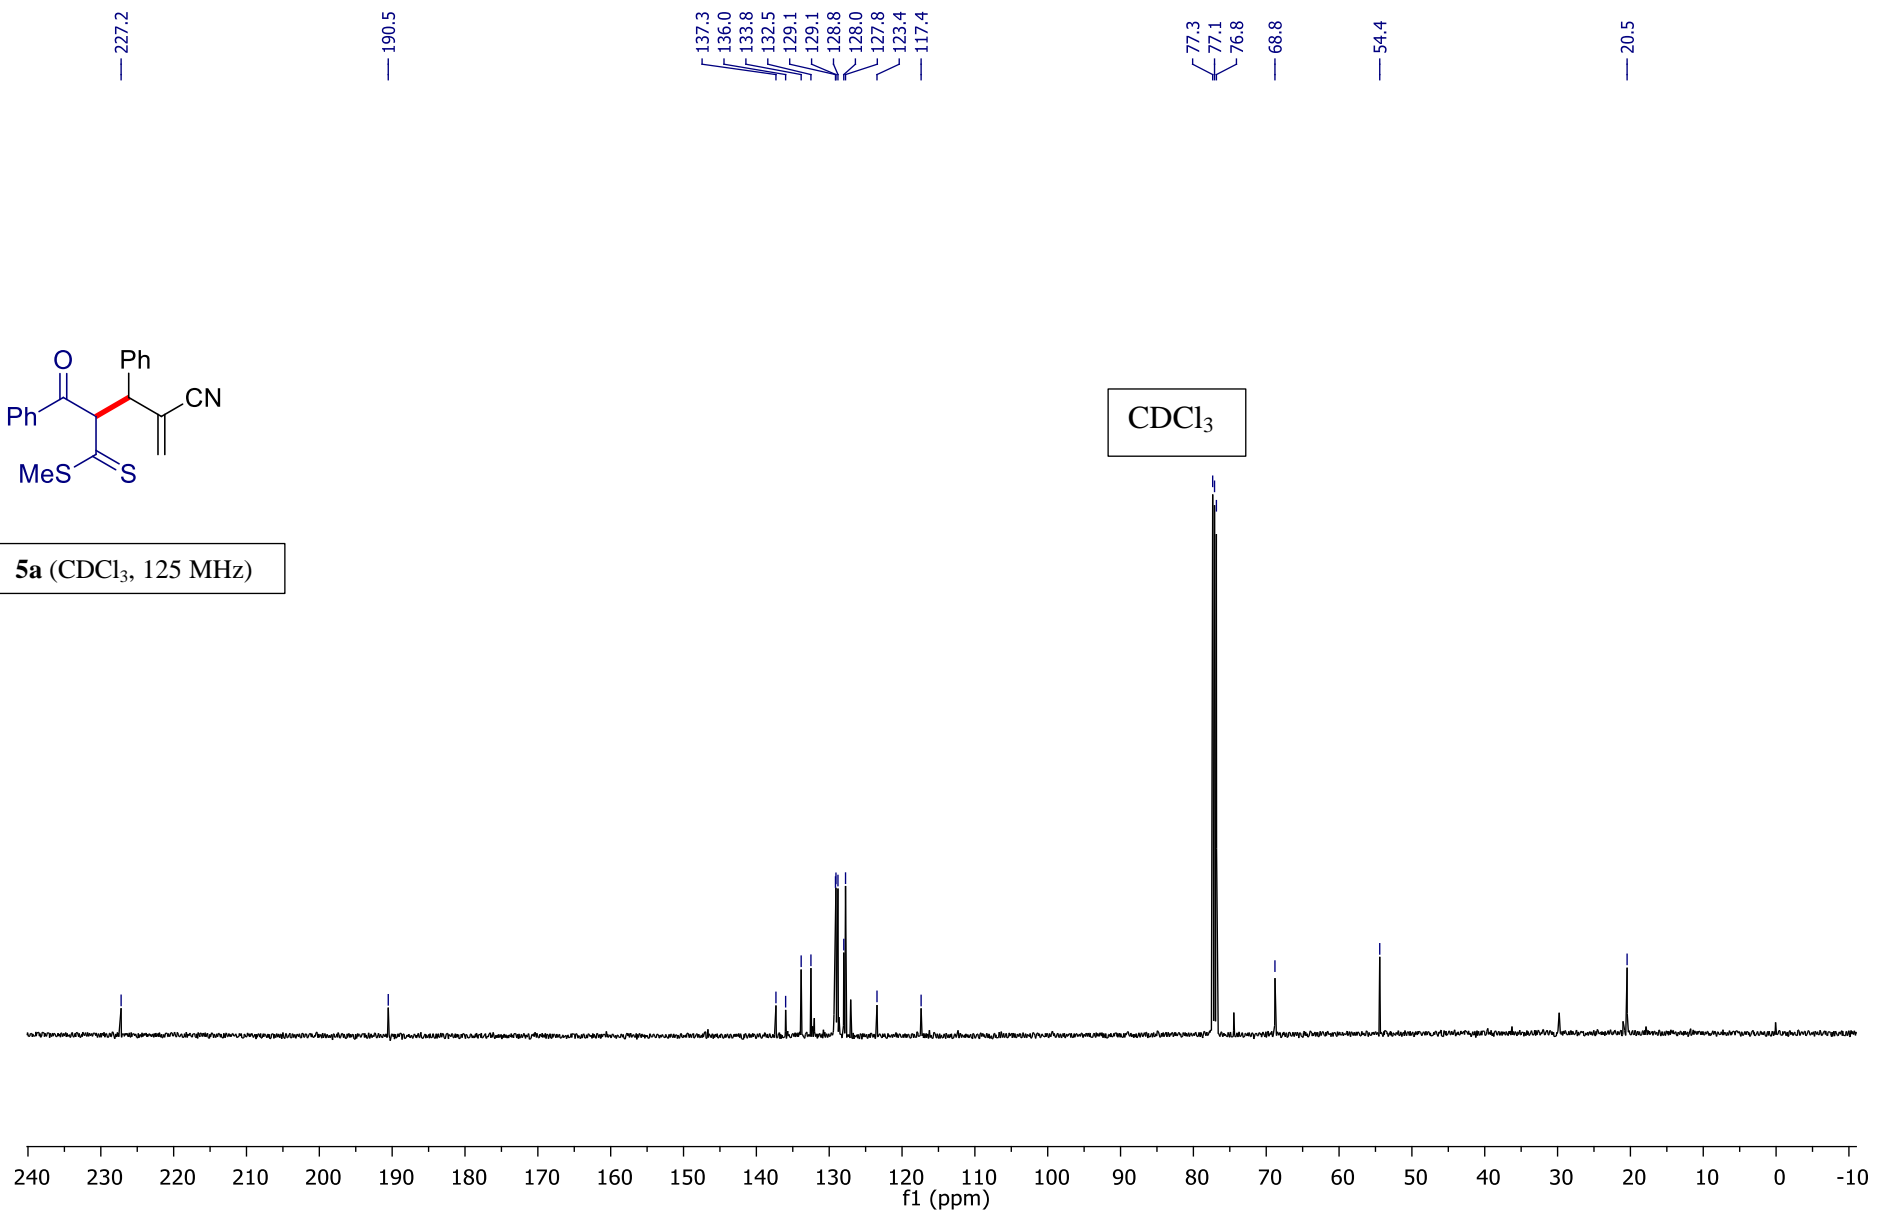

**$^1\text{H}$  (500 MHz,  $\text{CDCl}_3$ ) and  $^{13}\text{C}$ ( $^1\text{H}$ ) (125 MHz,  $\text{CDCl}_3$ ) NMR of Compound 6a**

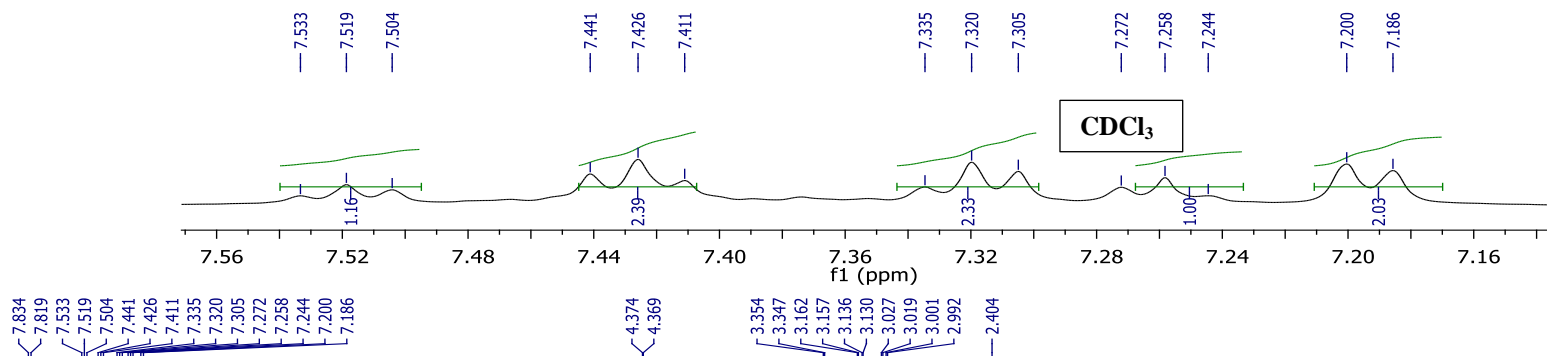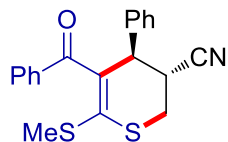

**6a** ( $\text{CDCl}_3$ , 500 MHz)

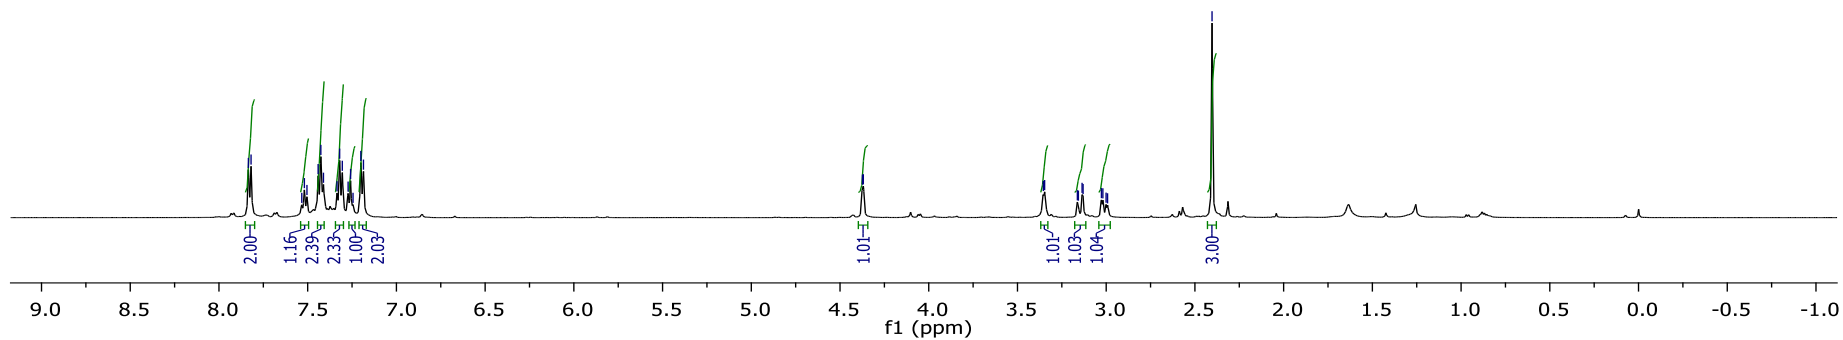

— 194.5

138.8  
137.2  
136.8  
133.1  
132.1  
129.2  
129.2  
128.7  
128.6  
128.4  
— 119.0

77.4  
77.2  
76.9

— 45.8

— 31.0

— 26.8

— 18.5

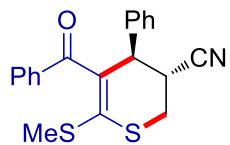

**6a** (CDCl<sub>3</sub>, 125 MHz)

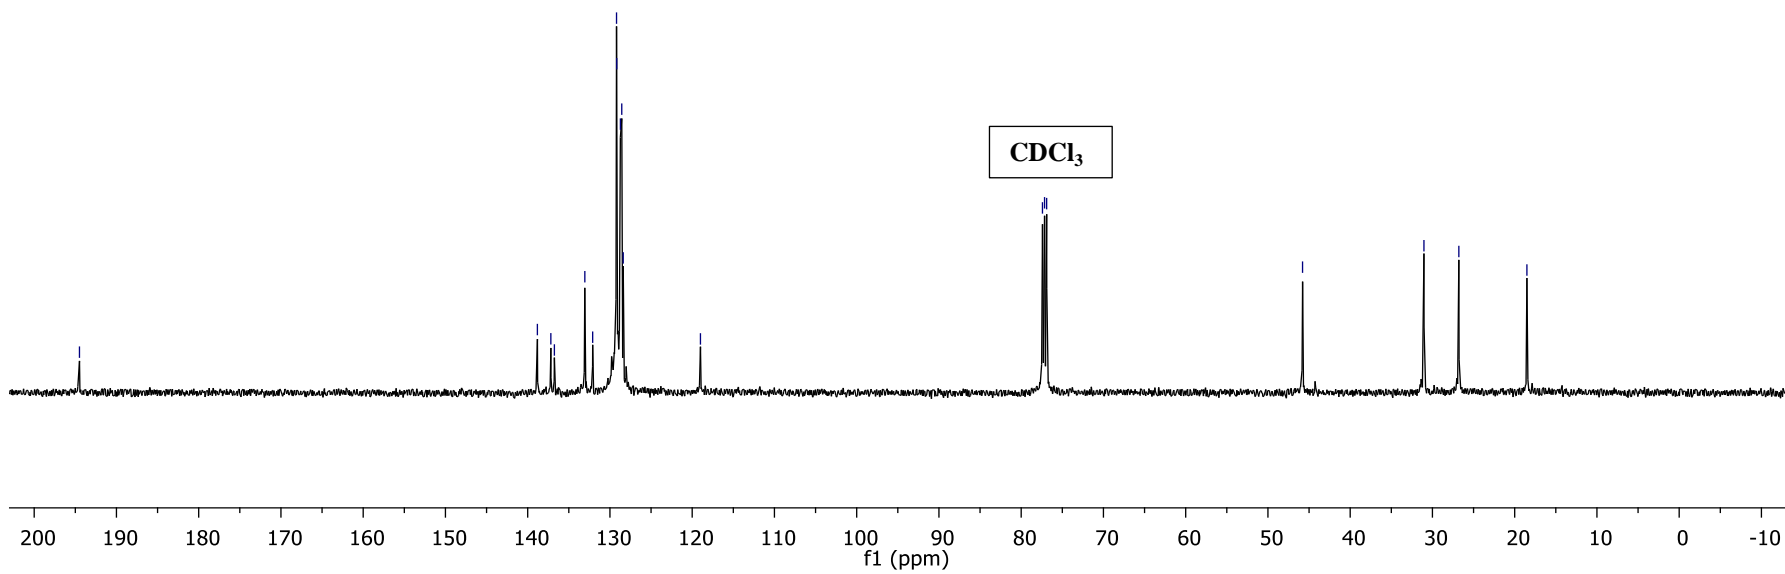

**$^1\text{H}$  (500 MHz,  $\text{CDCl}_3$ ) and  $^{13}\text{C}$ ( $^1\text{H}$ ) (125 MHz,  $\text{CDCl}_3$ ) NMR of Compound **6b****

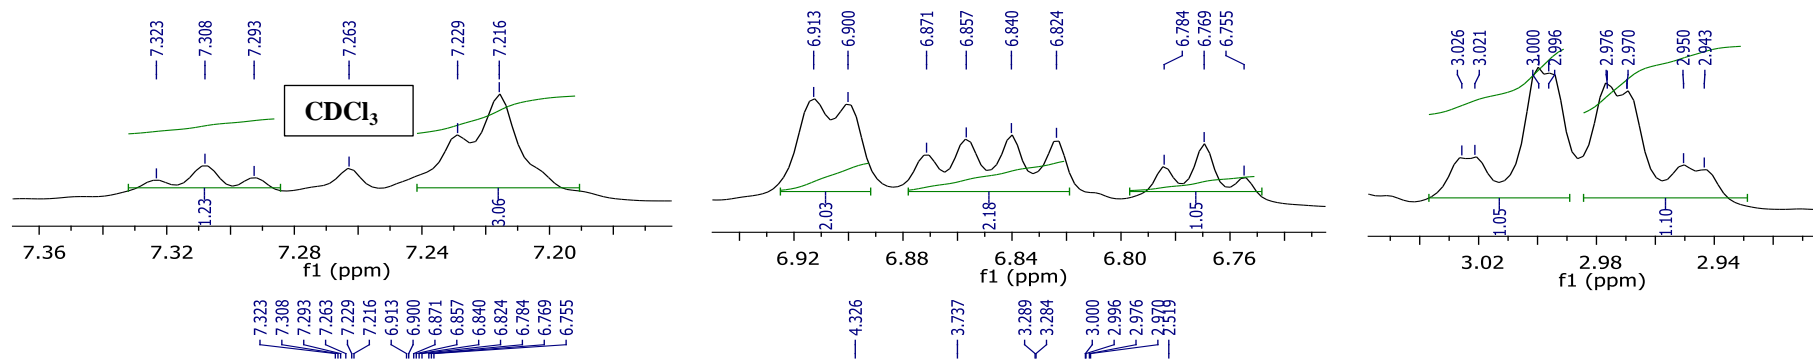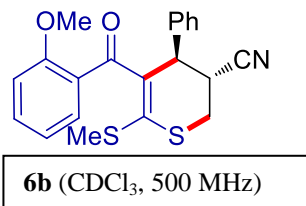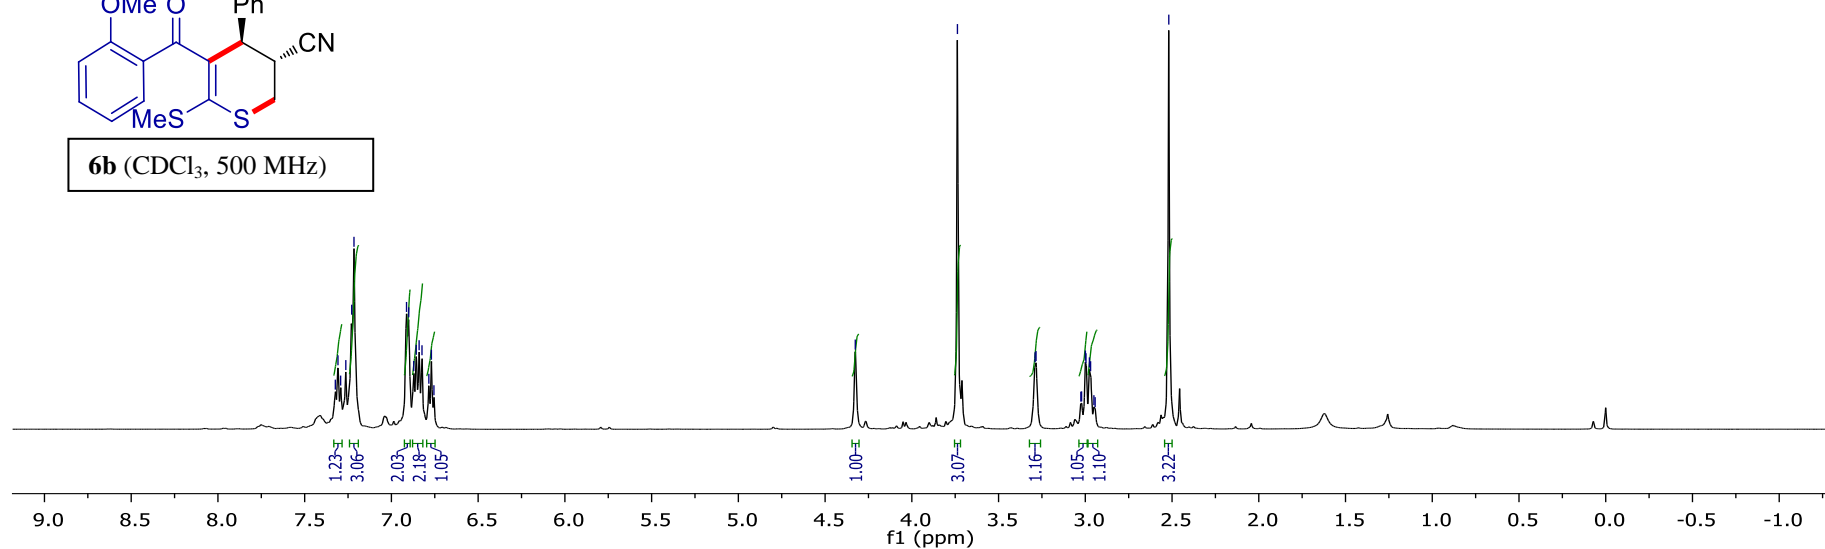

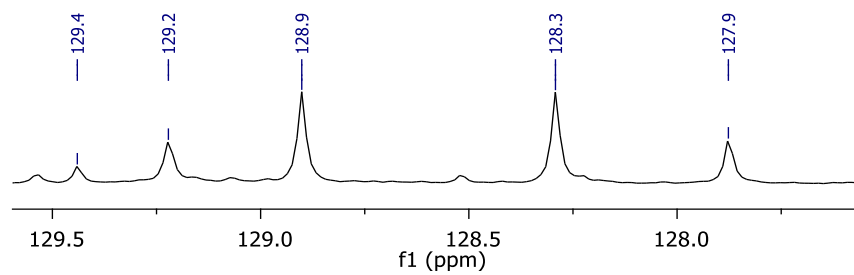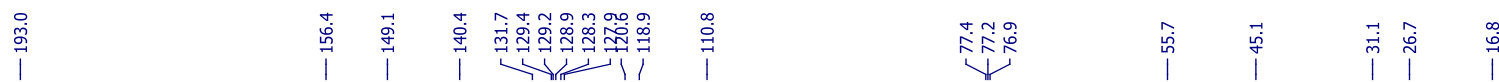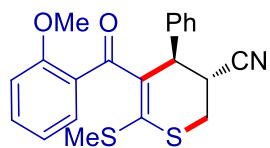

**6b** (CDCl<sub>3</sub>, 125 MHz)

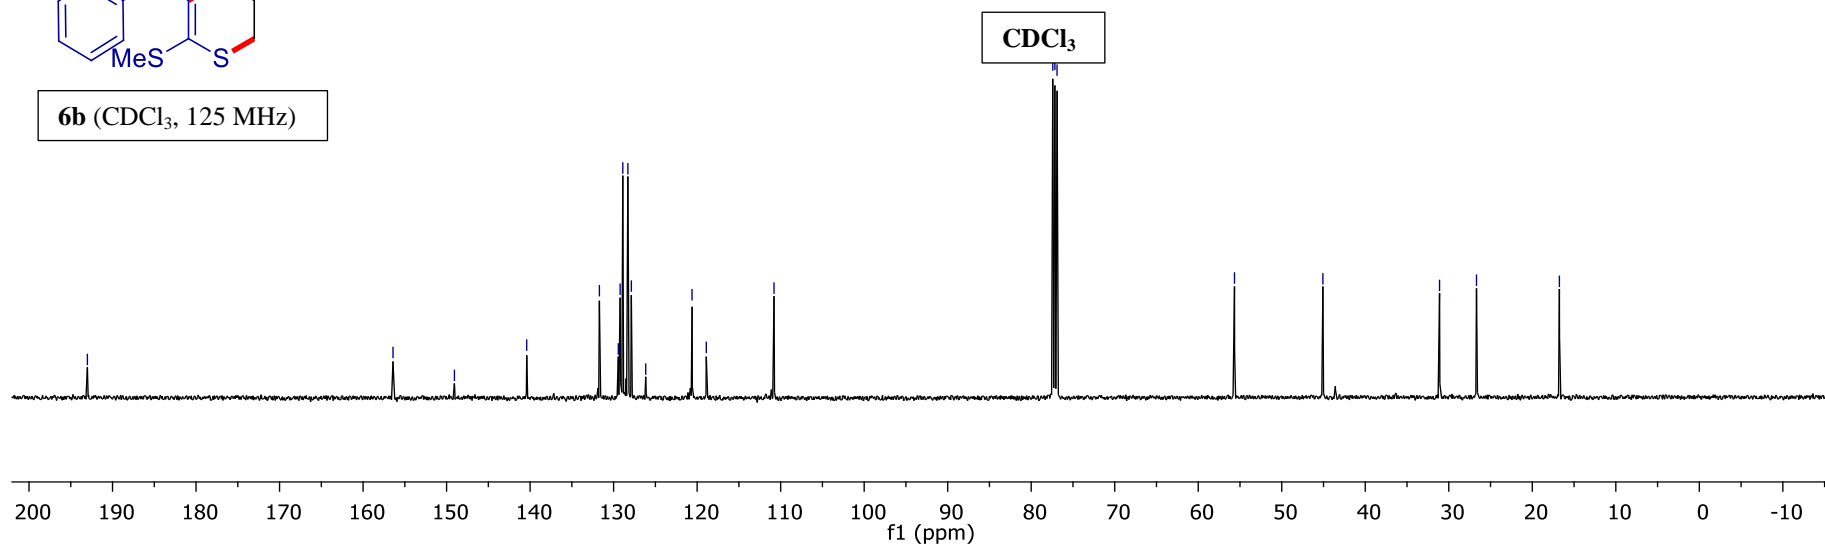

**$^1\text{H}$  (500 MHz,  $\text{CDCl}_3$ ) and  $^{13}\text{C}$ ( $^1\text{H}$ ) (125 MHz,  $\text{CDCl}_3$ ) NMR of Compound **6c****

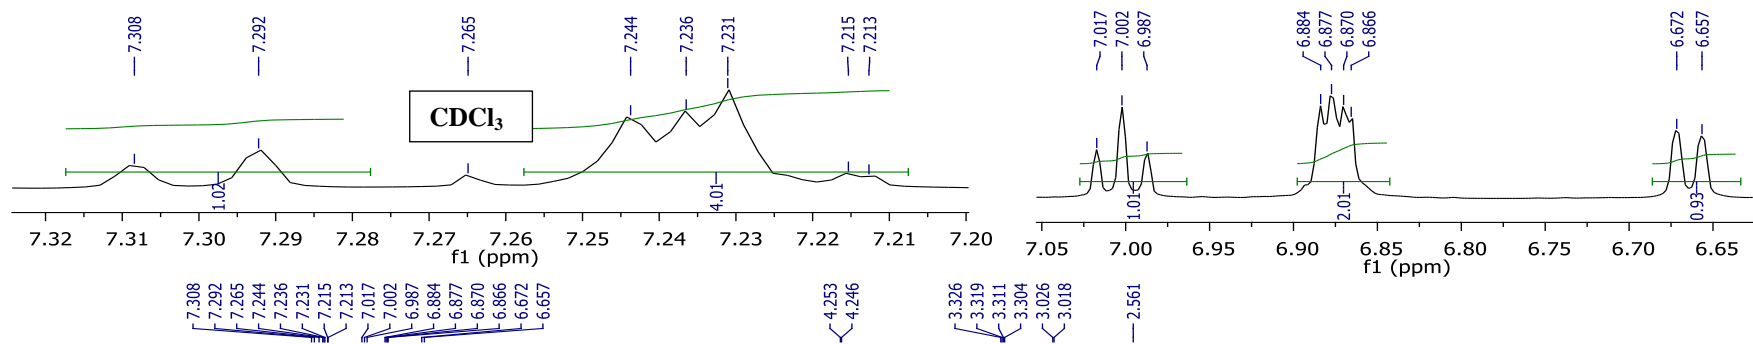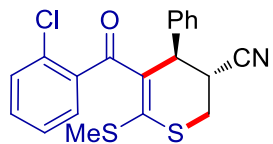

**6c** ( $\text{CDCl}_3$ , 500 MHz)

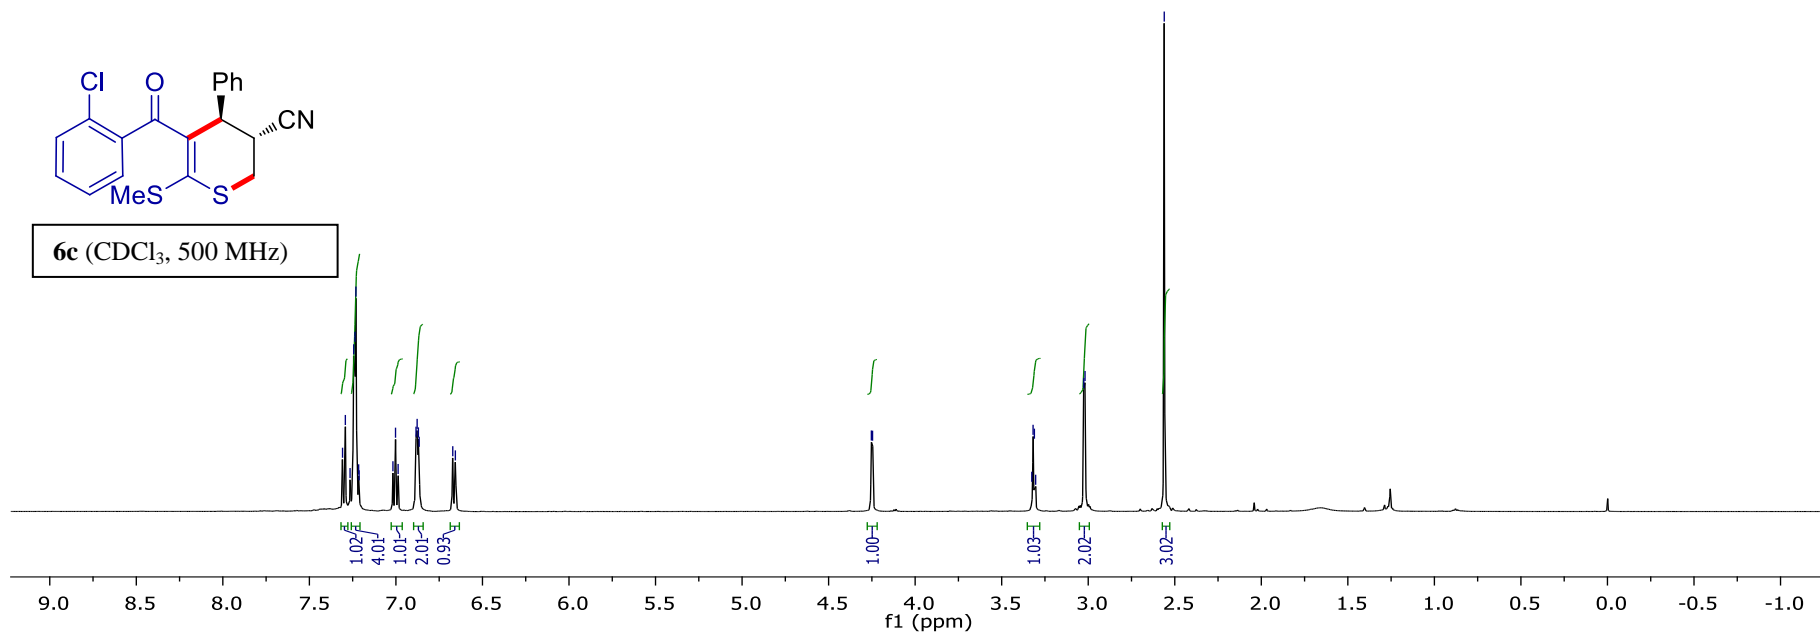

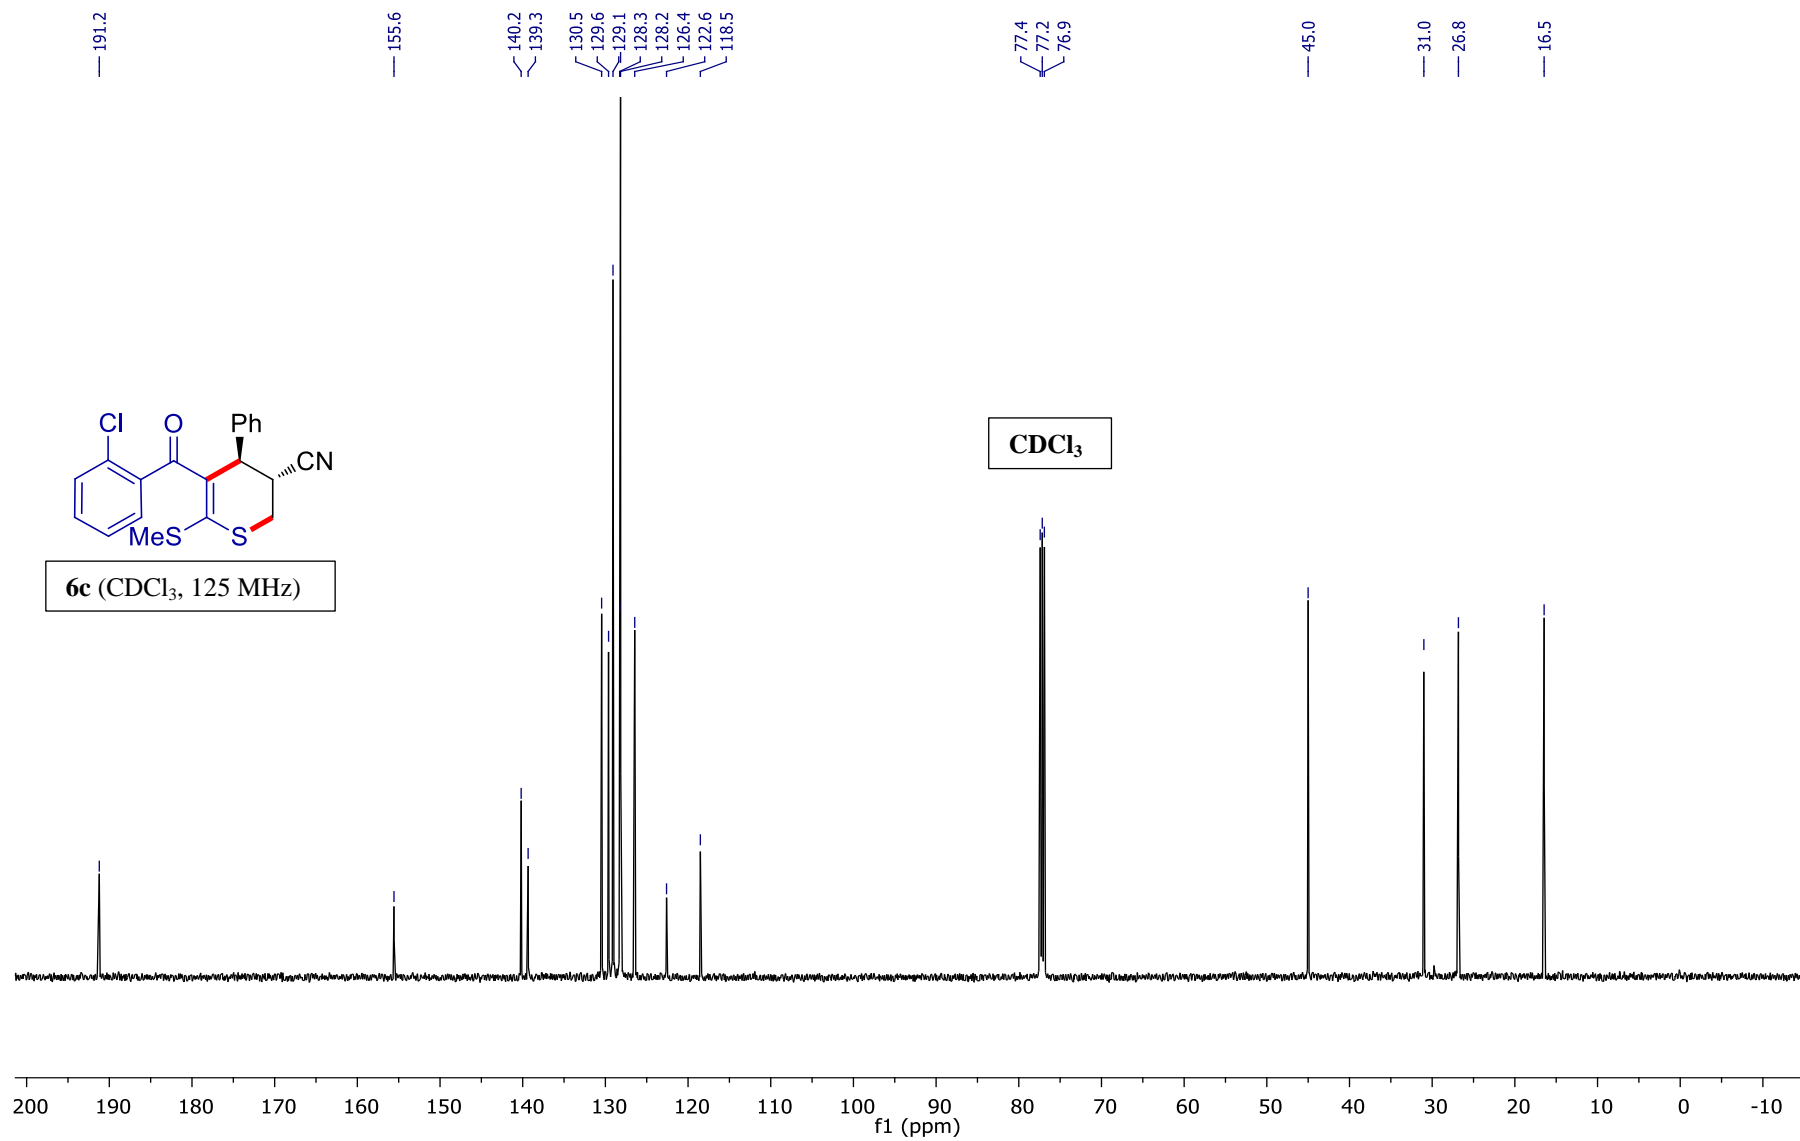



# $^1\text{H}$ (500 MHz, $\text{CDCl}_3$ ) and $^{13}\text{C}$ ( $^1\text{H}$ ) (125 MHz, $\text{CDCl}_3$ ) NMR of Compound **6d**

The trace amount of impurity is the inseparable diastereomer.

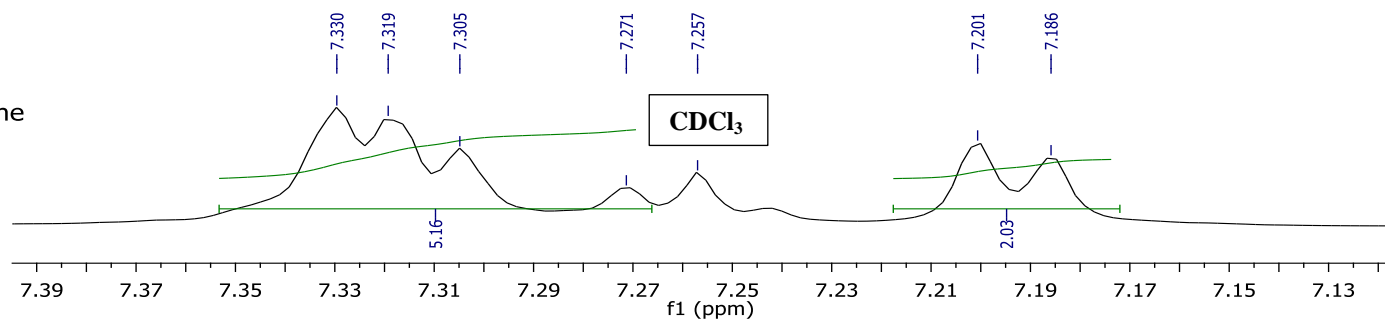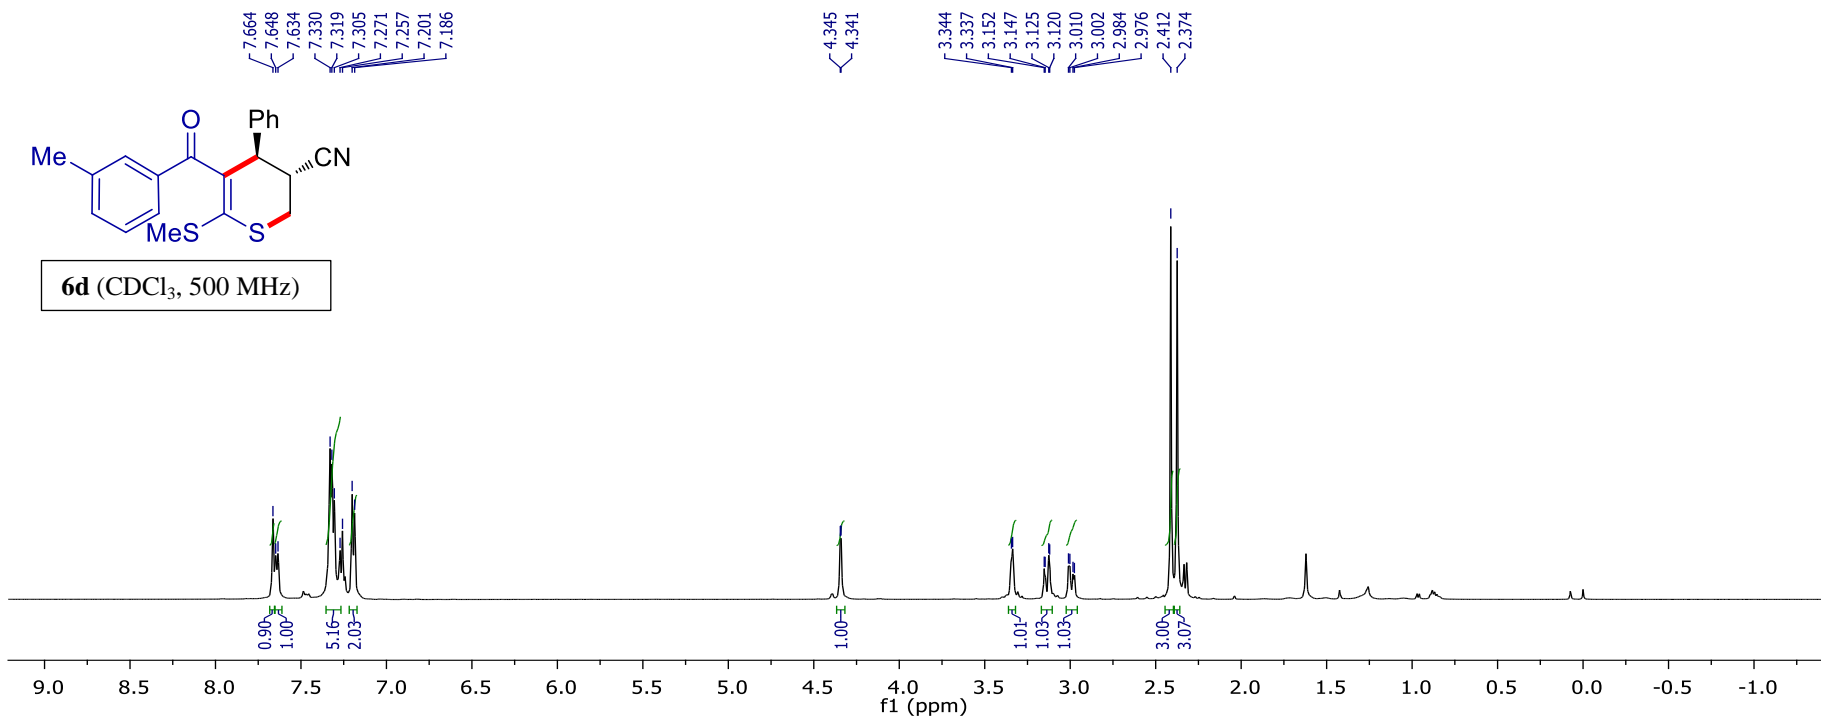

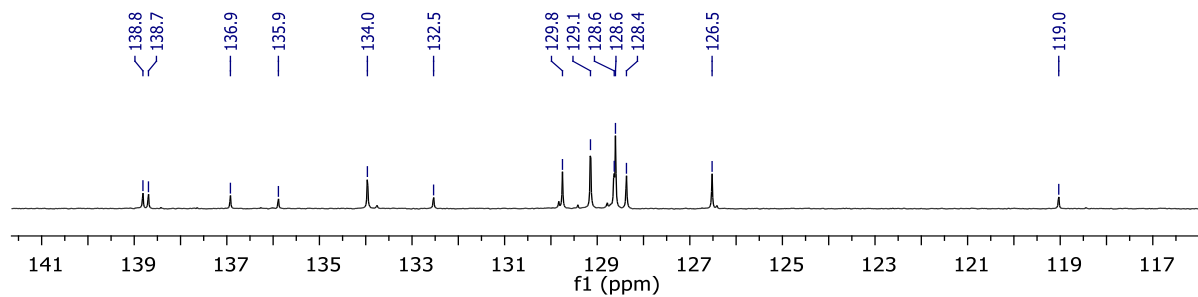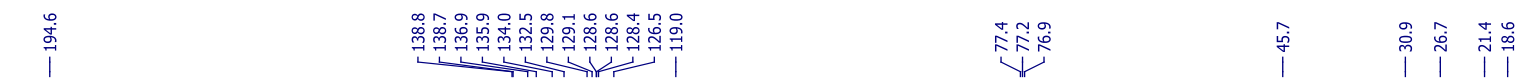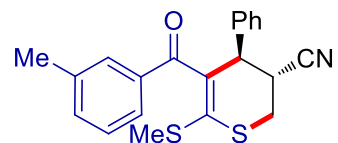

**6d** (CDCl<sub>3</sub>, 125 MHz)

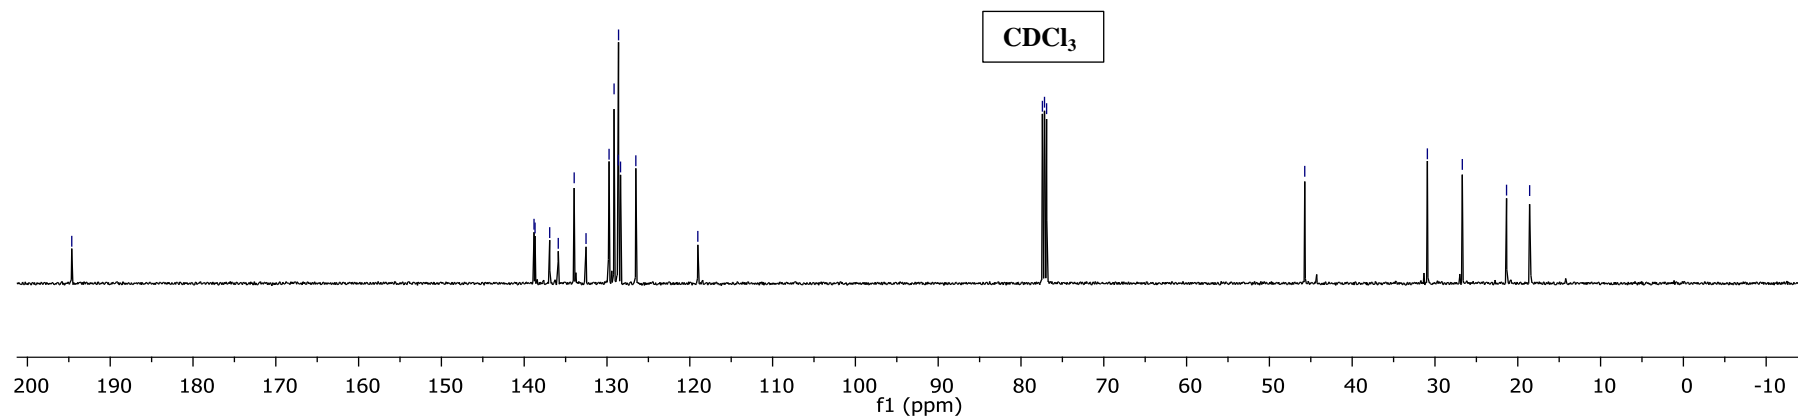

**$^1\text{H}$  (500 MHz,  $\text{CDCl}_3$ ) and  $^{13}\text{C}$  ( $^1\text{H}$ ) (125 MHz,  $\text{CDCl}_3$ ) NMR of Compound **6e****

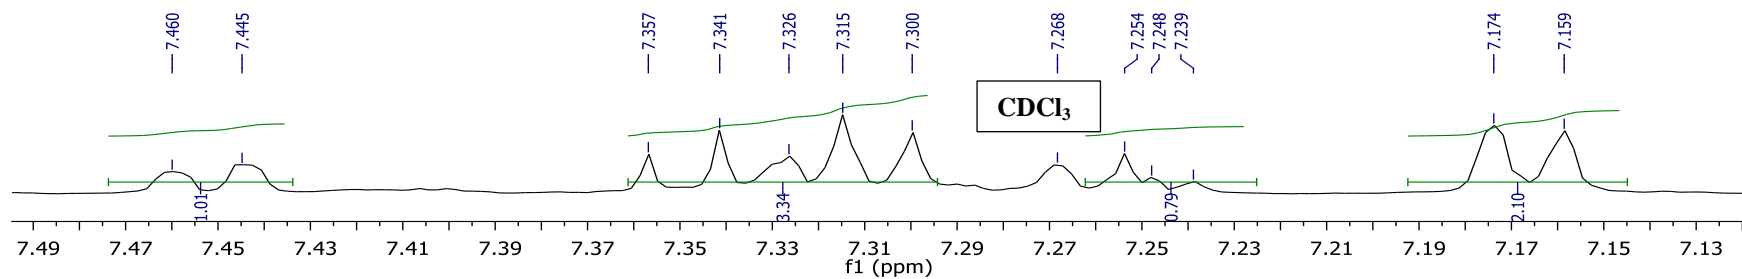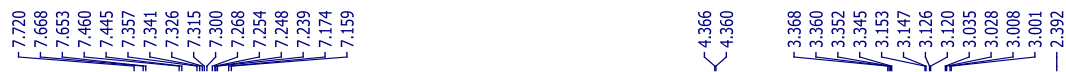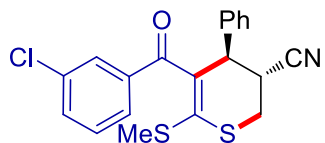

**6e** ( $\text{CDCl}_3$ , 500 MHz)

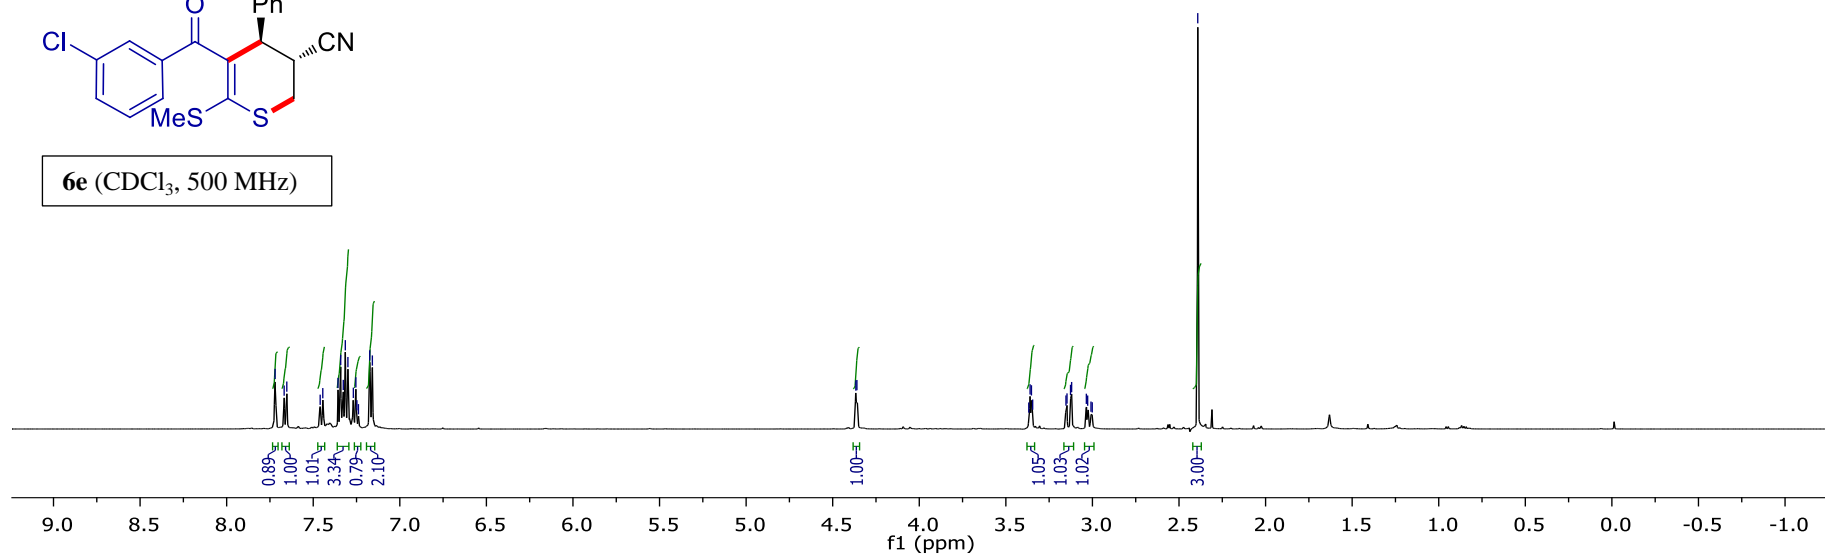

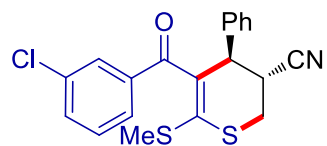

**6e** (CDCl<sub>3</sub>, 125 MHz)

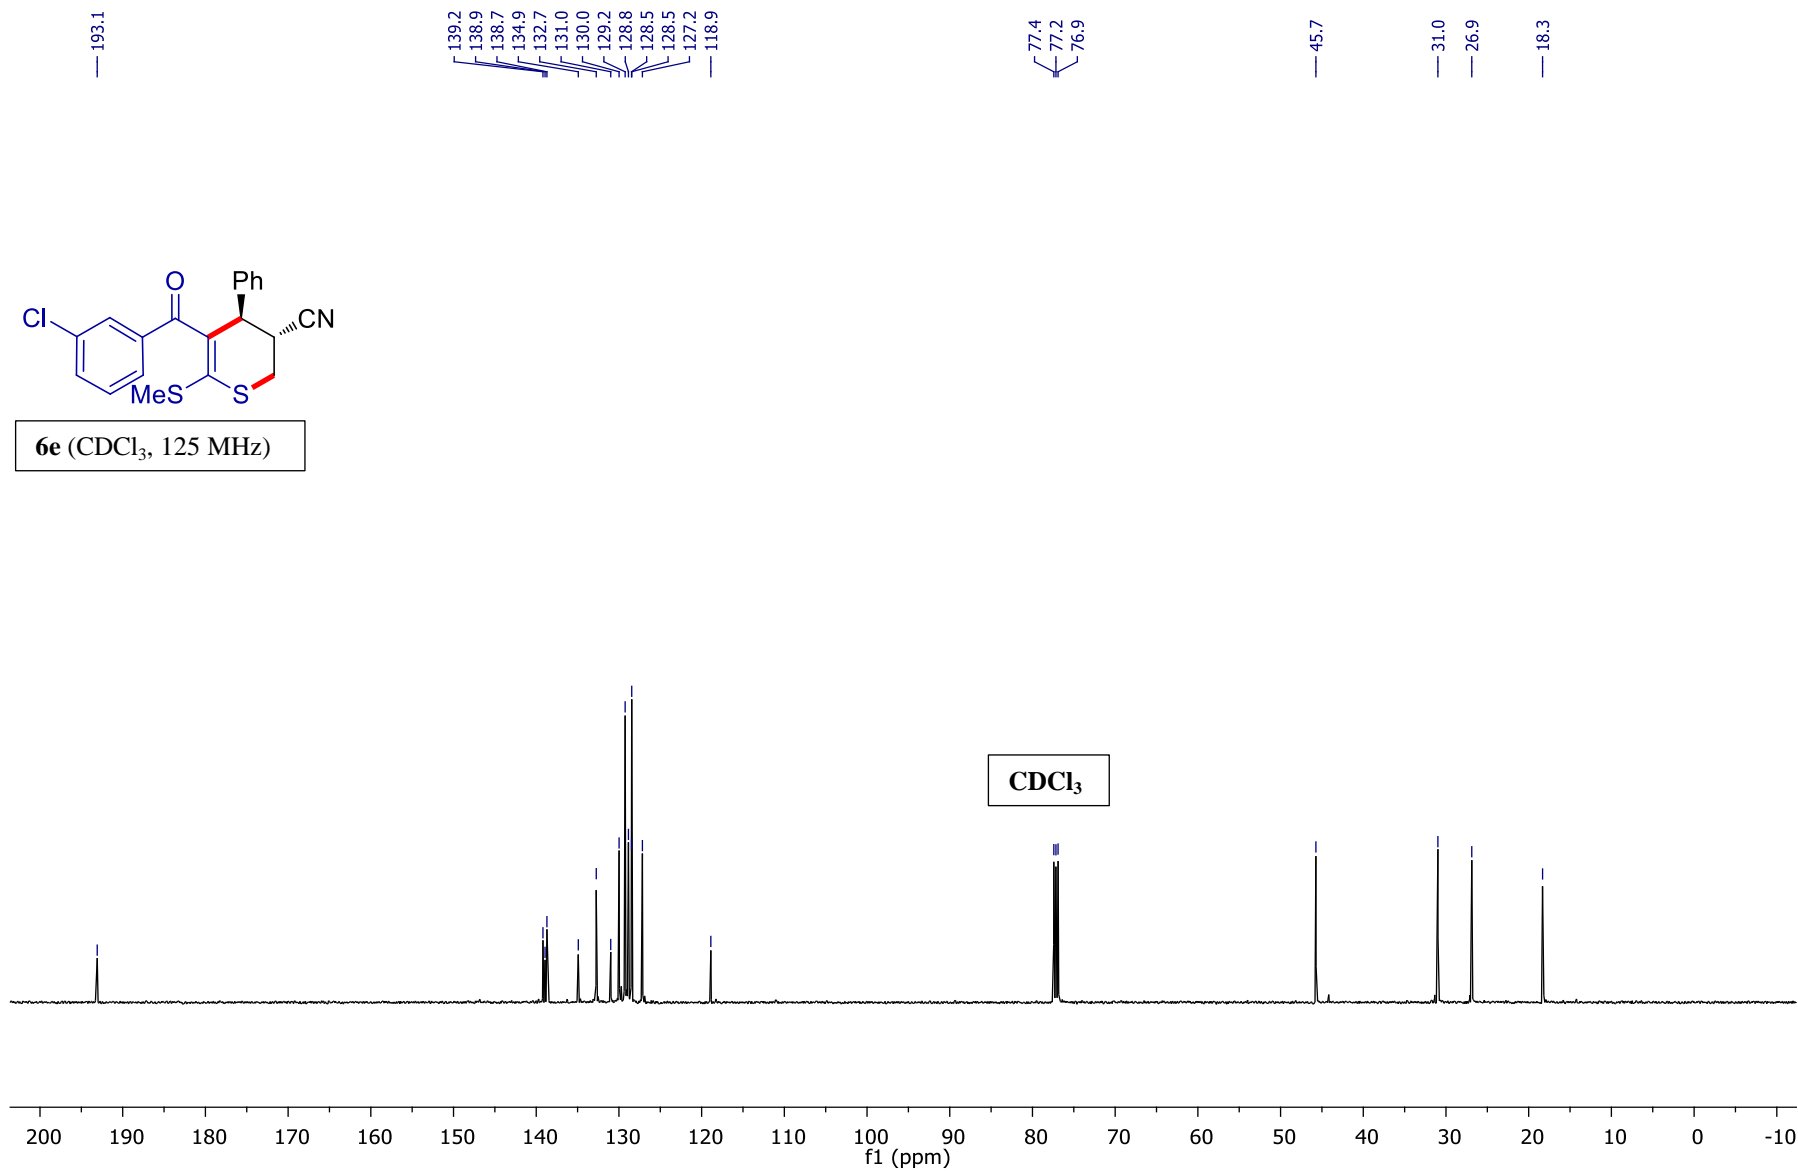

## DEPT-45 NMR of Compound 6e

132.7  
130.0  
129.2  
128.9  
128.5  
128.4  
127.2

—45.7

—31.0

—26.9

—18.3

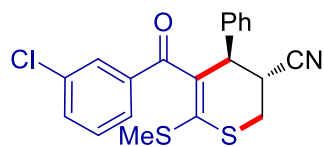

6e DEPT-45 (CDCl<sub>3</sub>, 125 MHz)

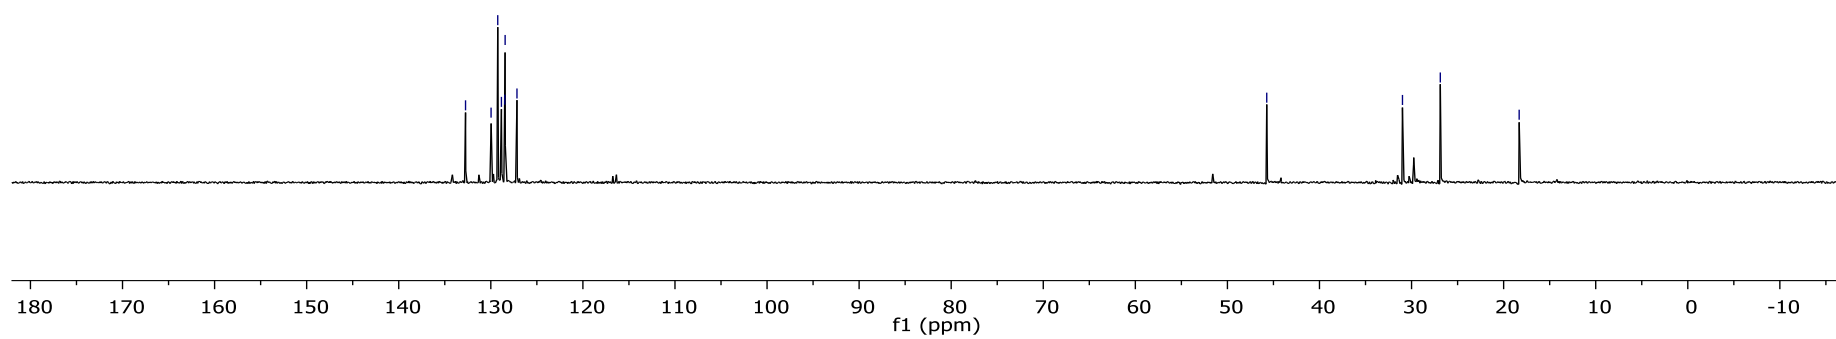

**$^1\text{H}$  (500 MHz,  $\text{CDCl}_3$ ) and  $^{13}\text{C}$ ( $^1\text{H}$ ) (125 MHz,  $\text{CDCl}_3$ ) NMR of Compound **6f****

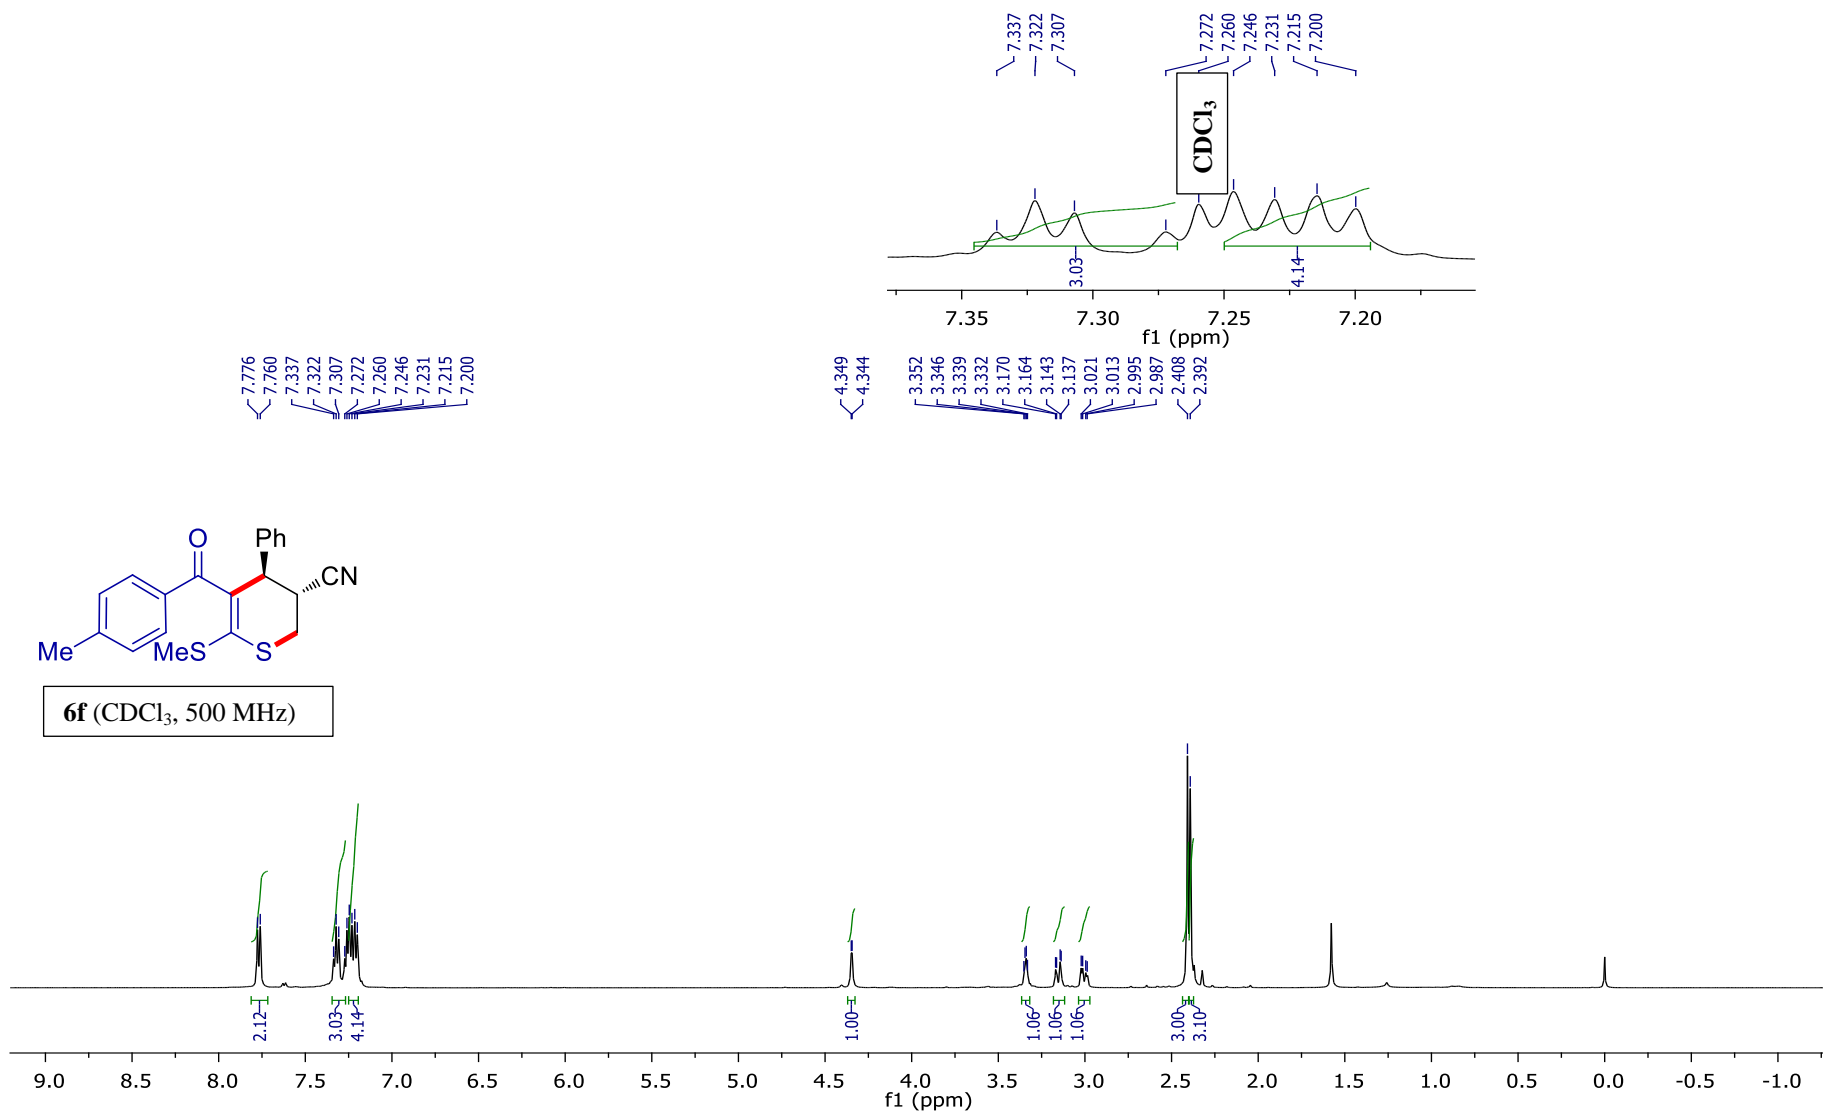

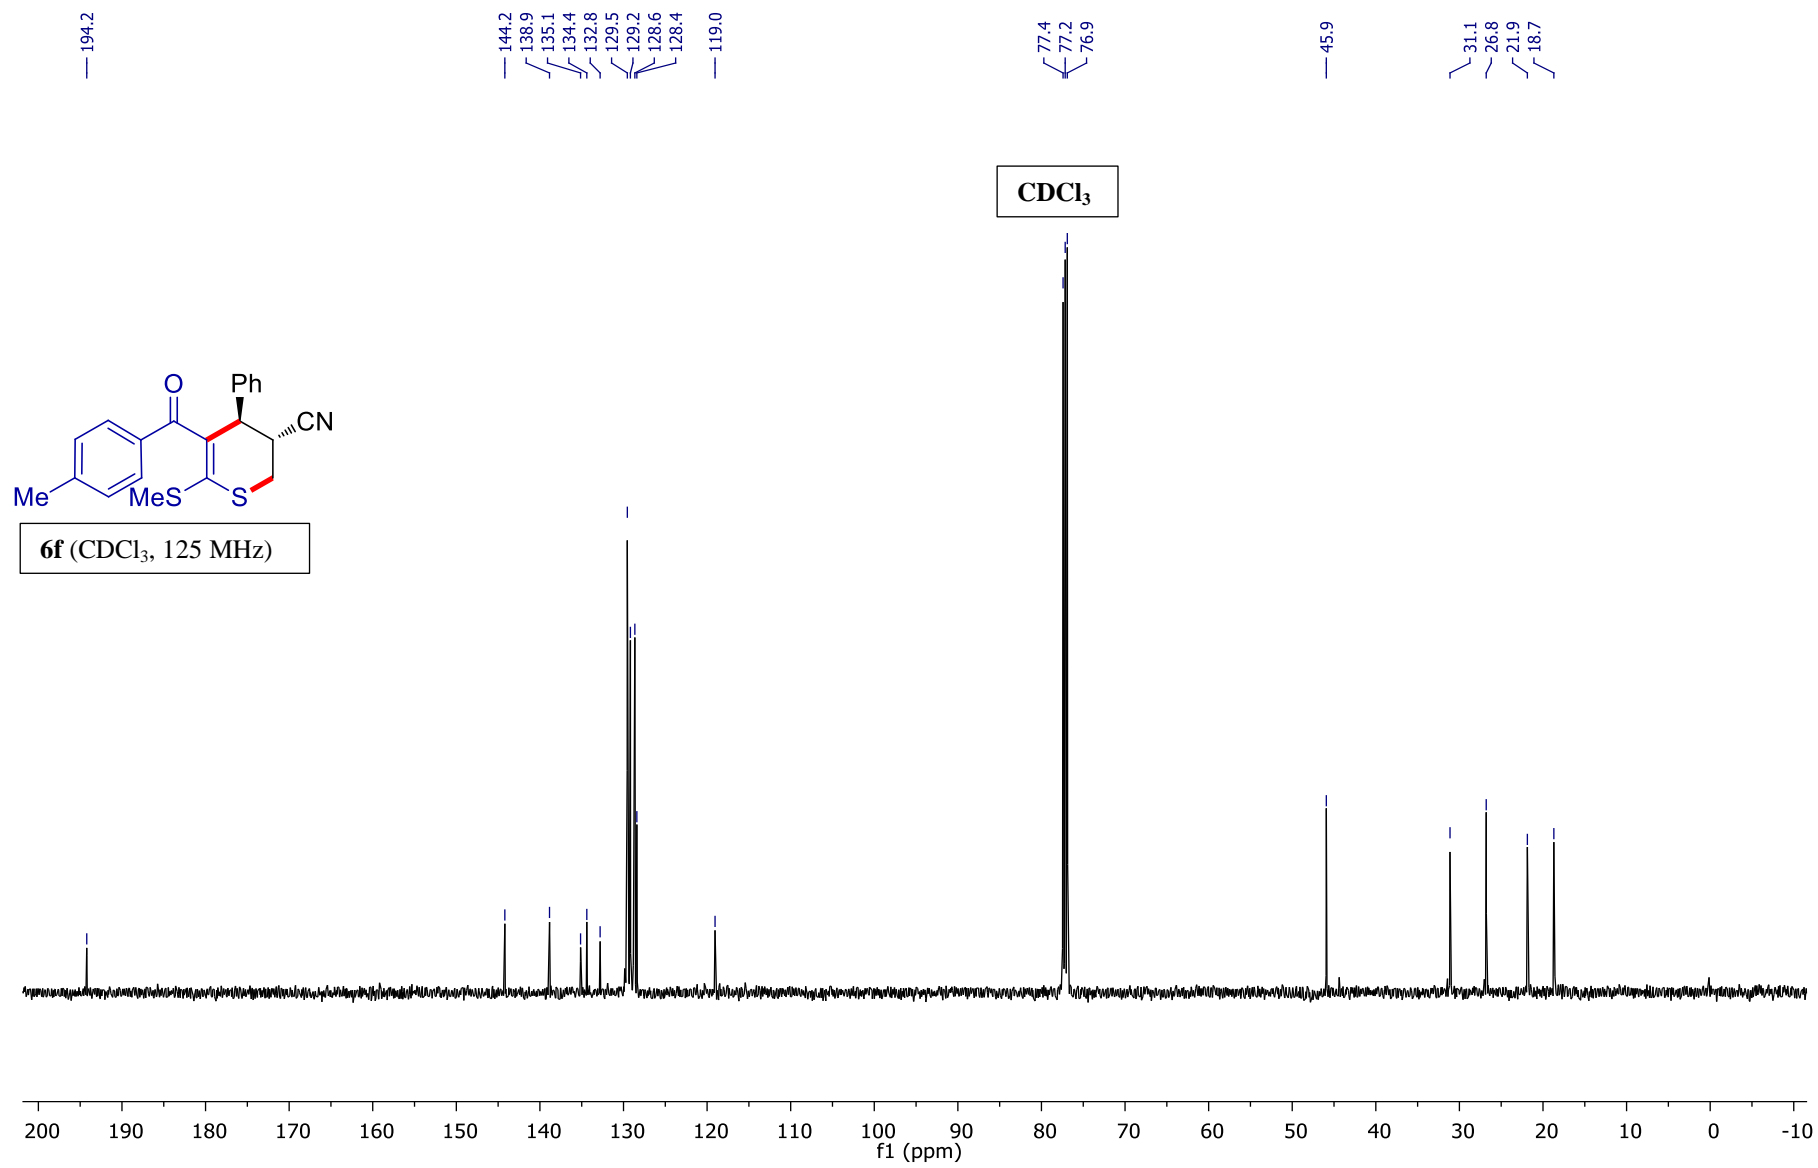

**$^1\text{H}$  (500 MHz,  $\text{CDCl}_3$ ) and  $^{13}\text{C}$ ( $^1\text{H}$ ) (125 MHz,  $\text{CDCl}_3$ ) NMR of Compound **6g****

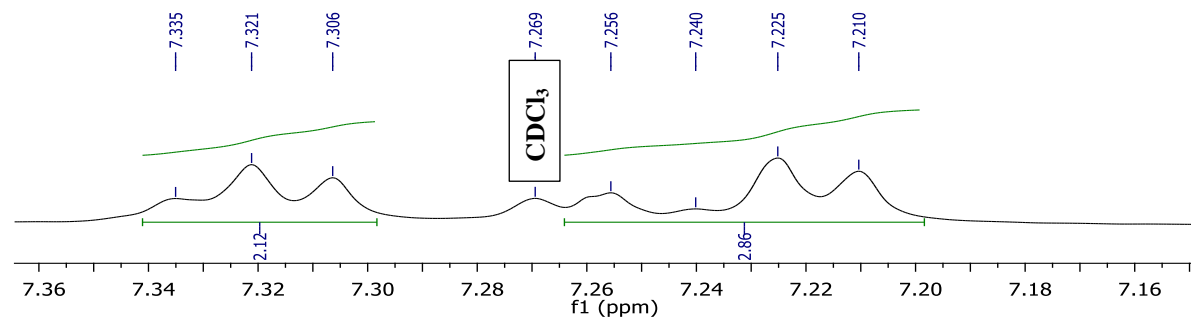

7.886  
7.869  
7.321  
7.306  
7.256  
7.225  
7.210  
6.912

4.318  
4.313  
3.845  
3.345  
3.338  
3.155  
3.129  
3.005  
2.996  
2.978  
2.970  
2.409

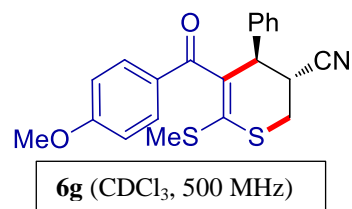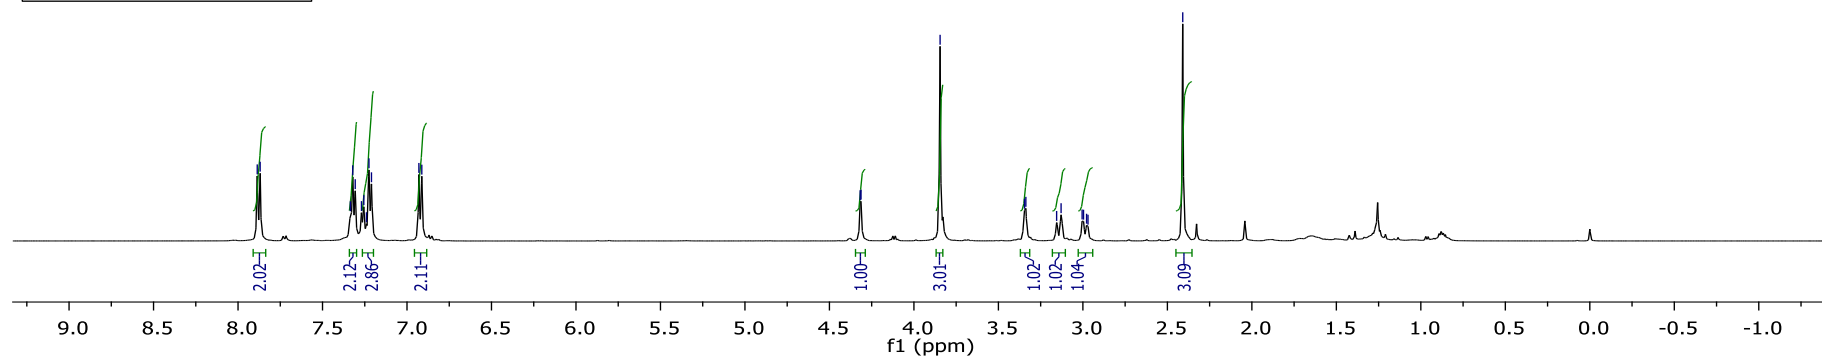



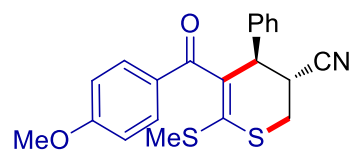

**6g** (CDCl<sub>3</sub>, 125 MHz)

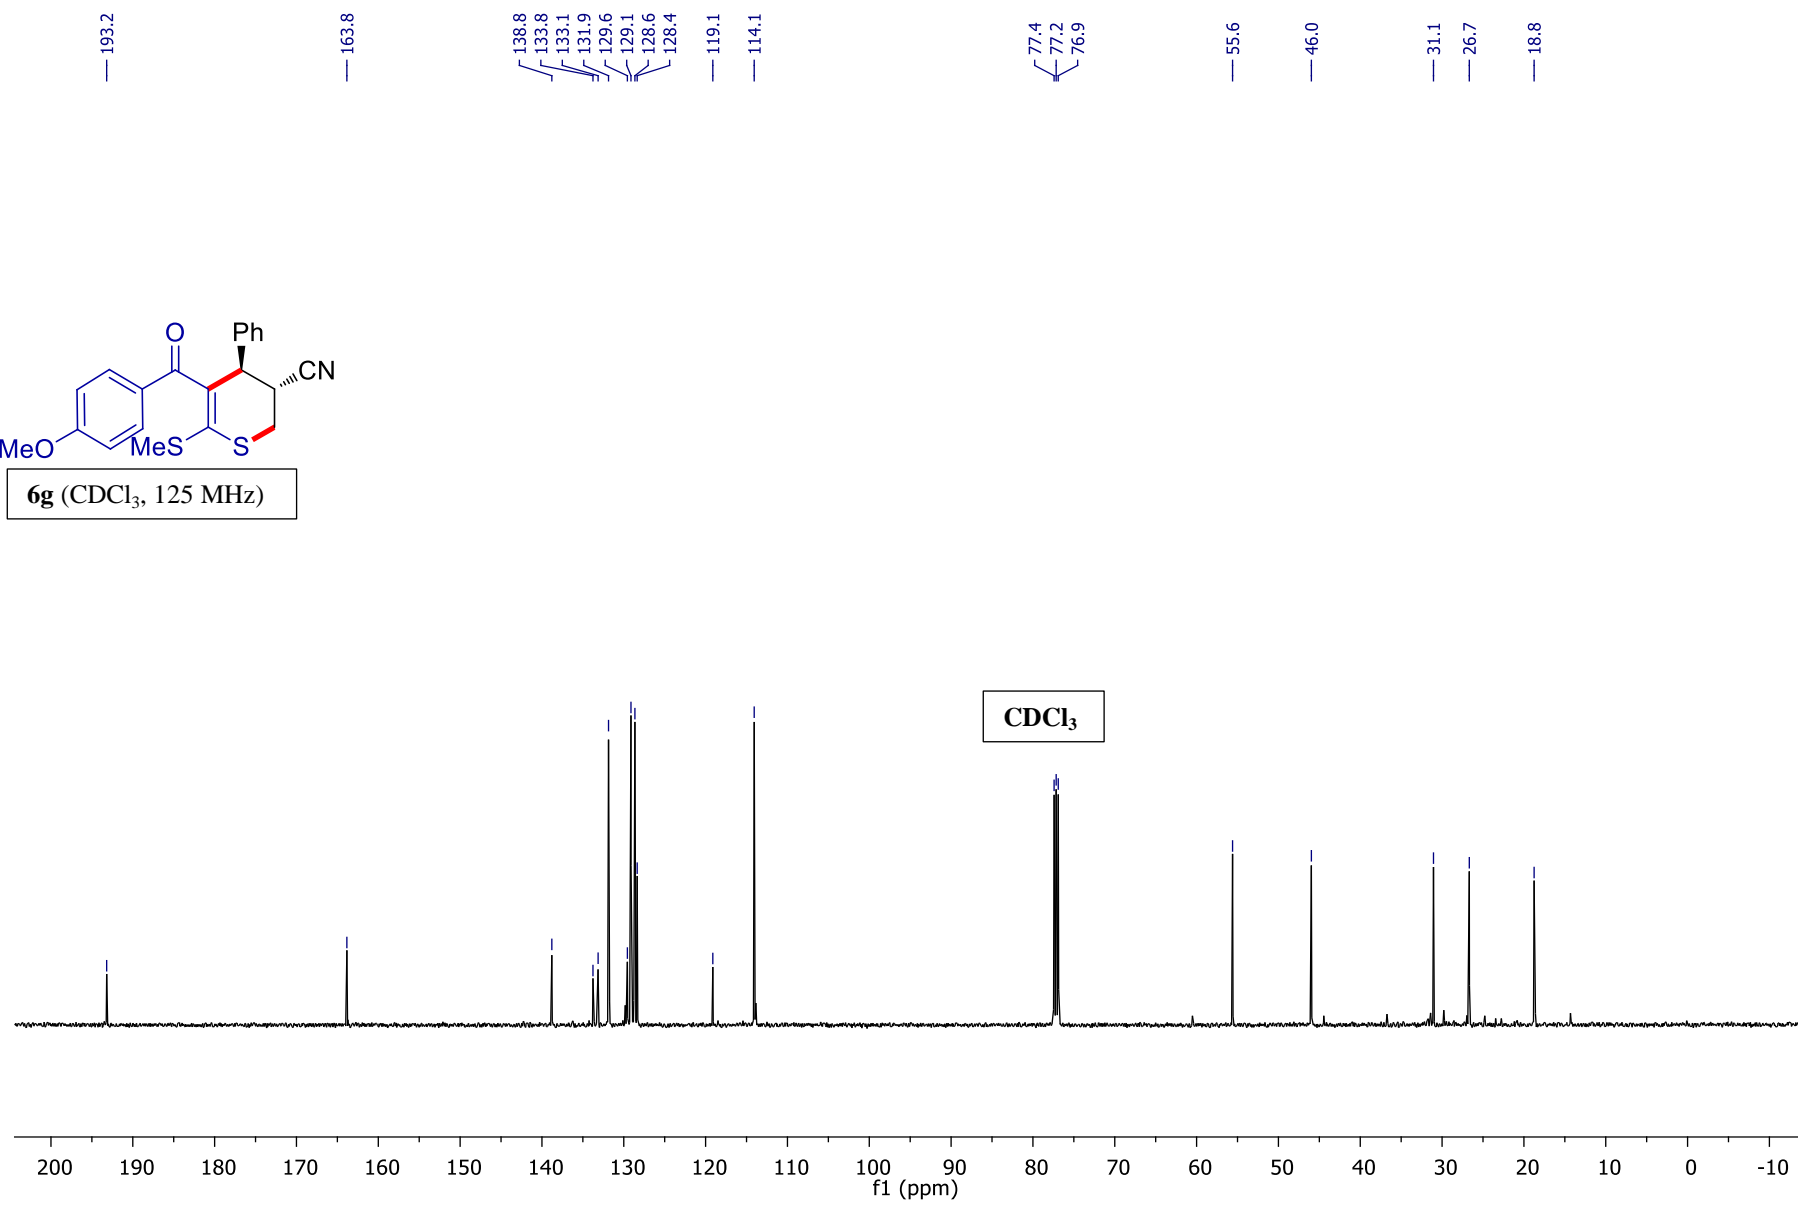

**$^1\text{H}$  (500 MHz,  $\text{CDCl}_3$ ) and  $^{13}\text{C}$ ( $^1\text{H}$ ) (125 MHz,  $\text{CDCl}_3$ ) NMR of Compound 6h**

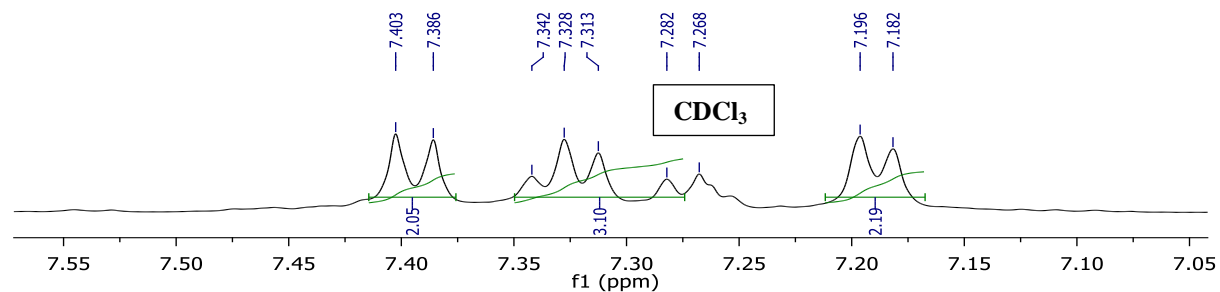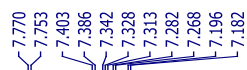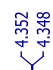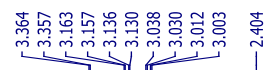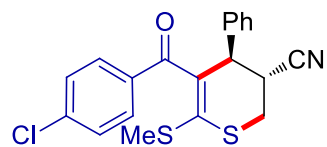

**6h** ( $\text{CDCl}_3$ , 500 MHz)

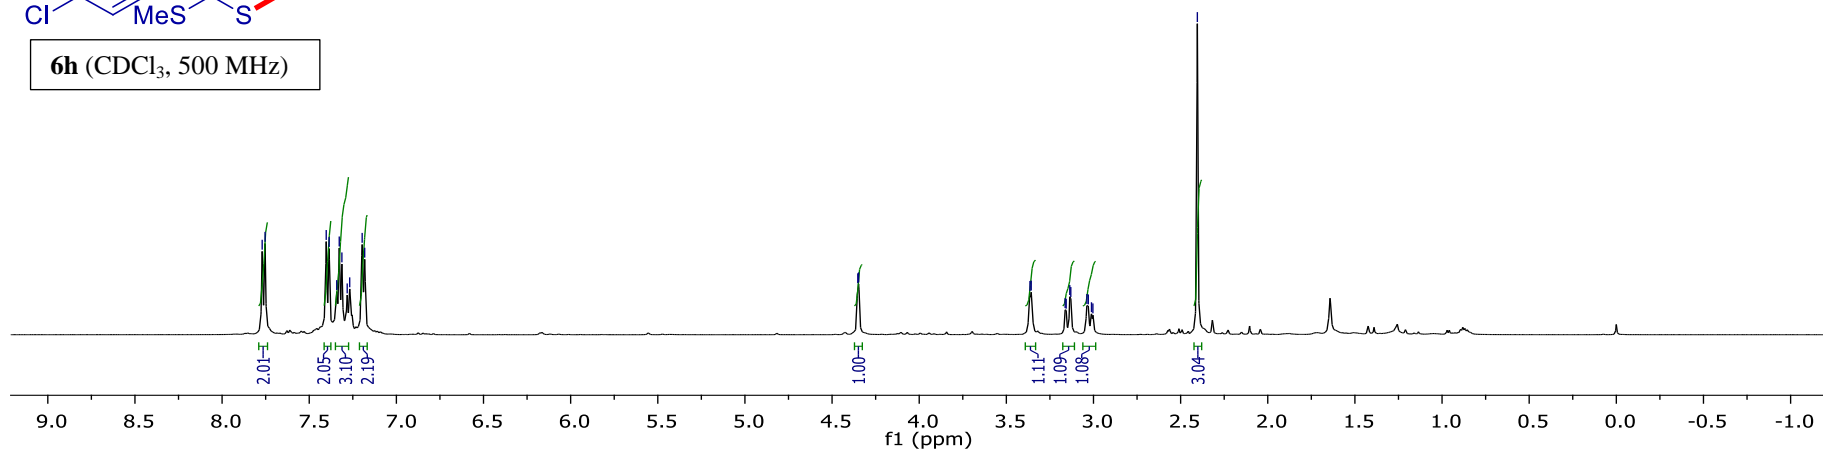

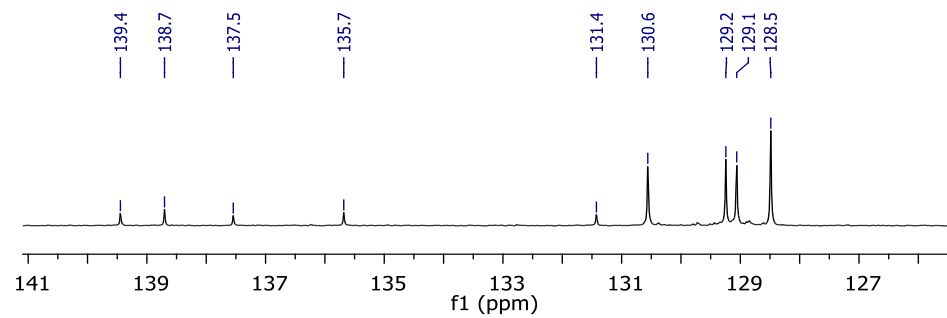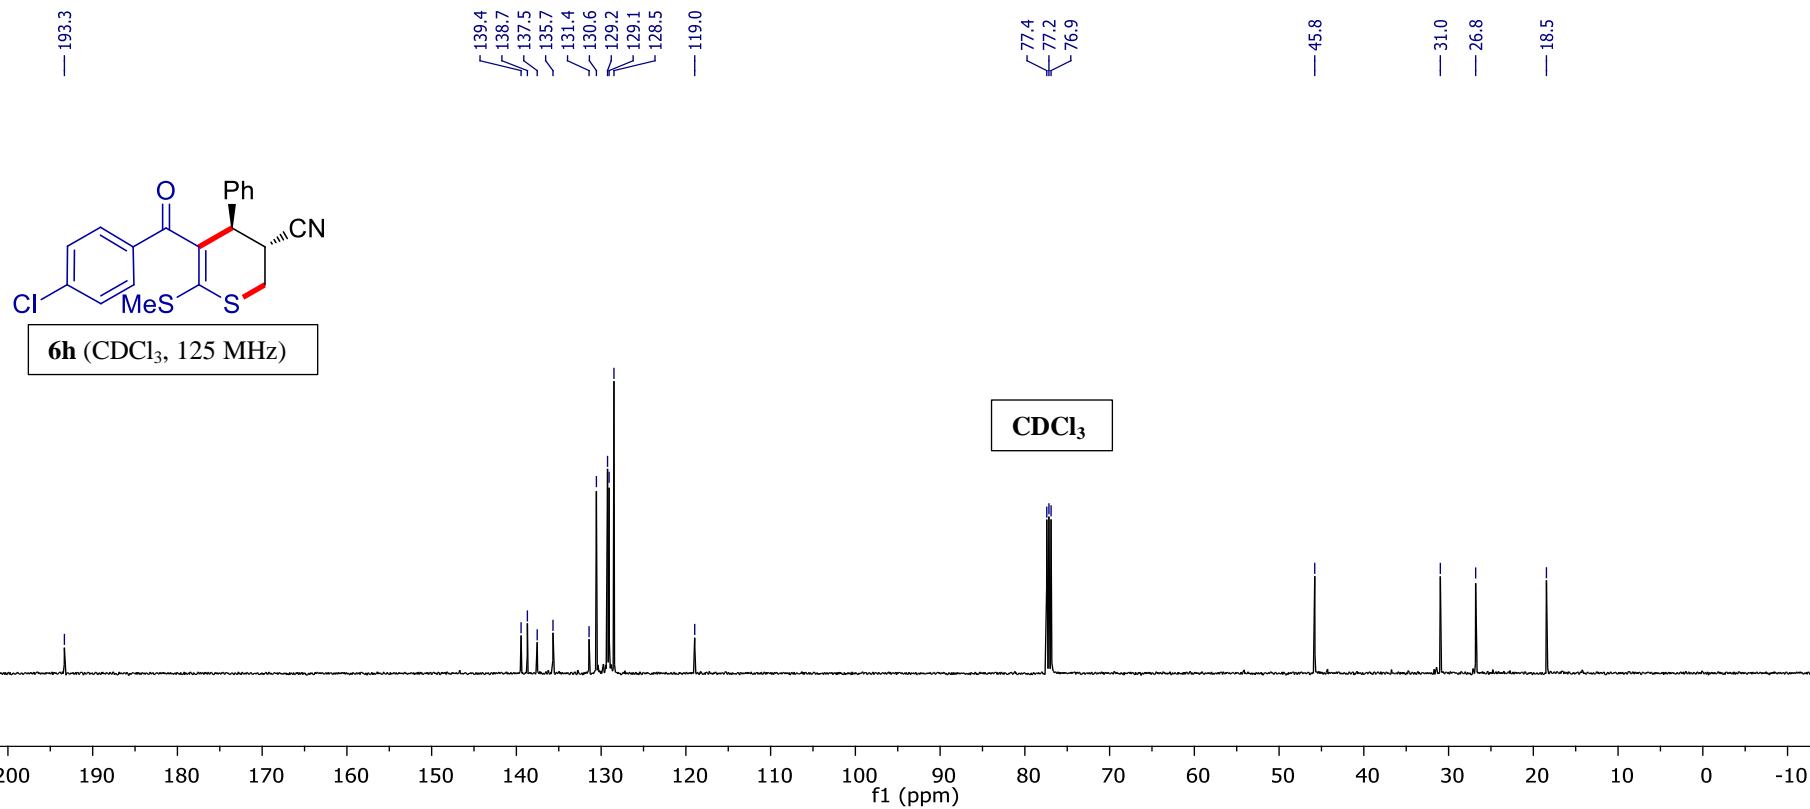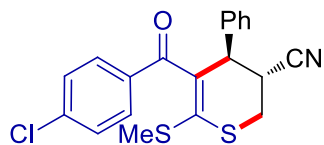

6h (CDCl<sub>3</sub>, 125 MHz)

**$^1\text{H}$  (500 MHz,  $\text{CDCl}_3$ ) and  $^{13}\text{C}$ ( $^1\text{H}$ ) (125 MHz,  $\text{CDCl}_3$ ) NMR of Compound **6i****

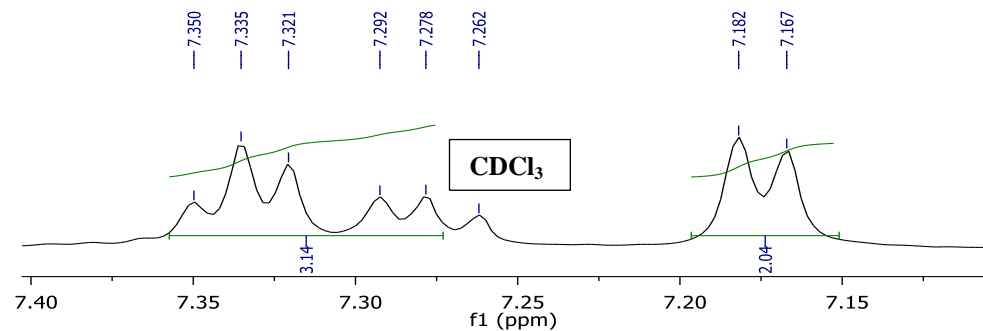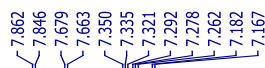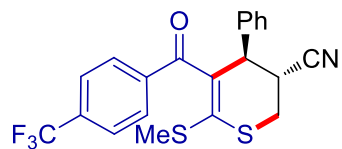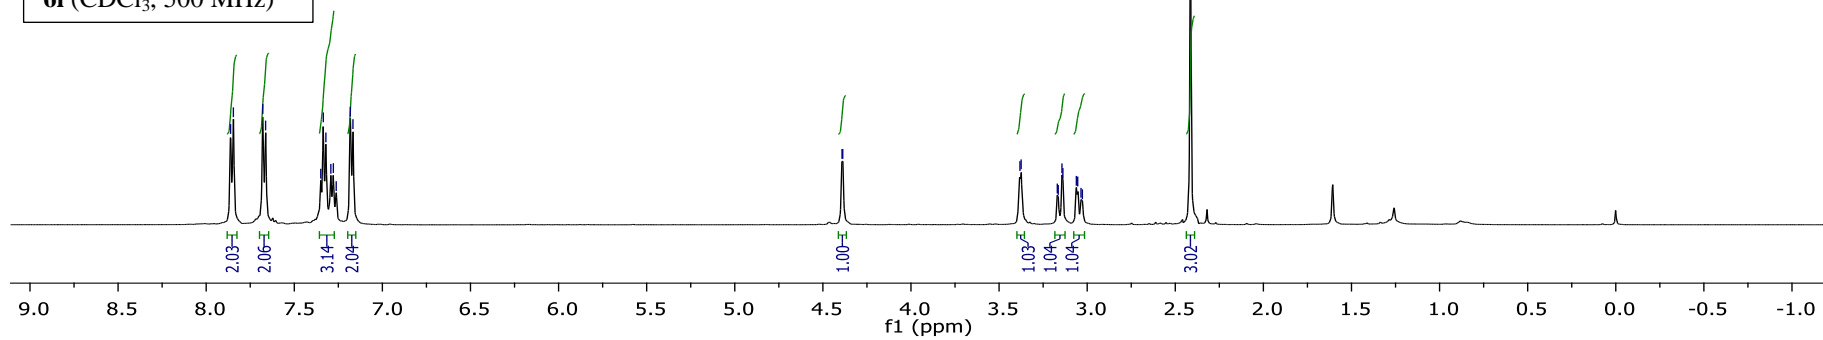

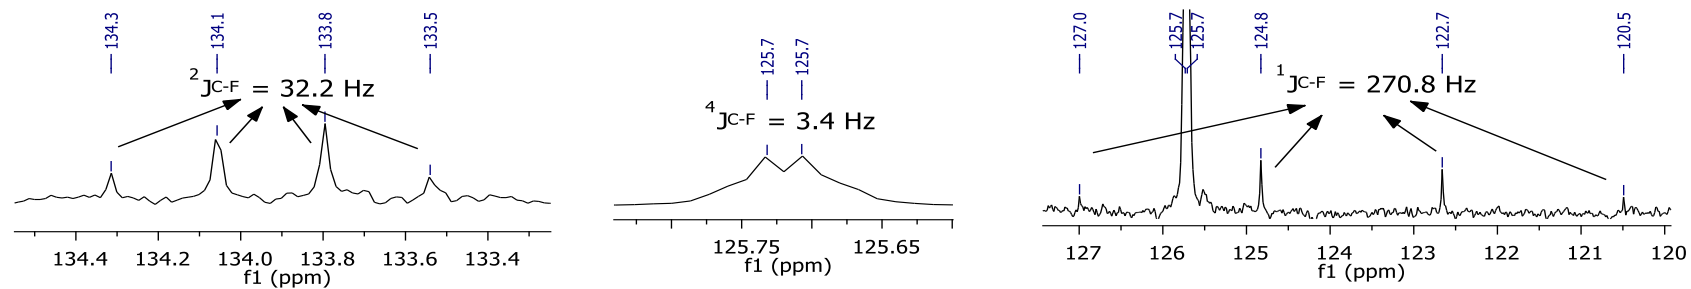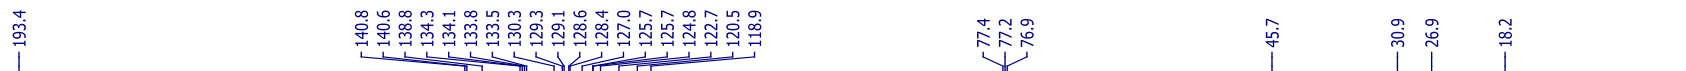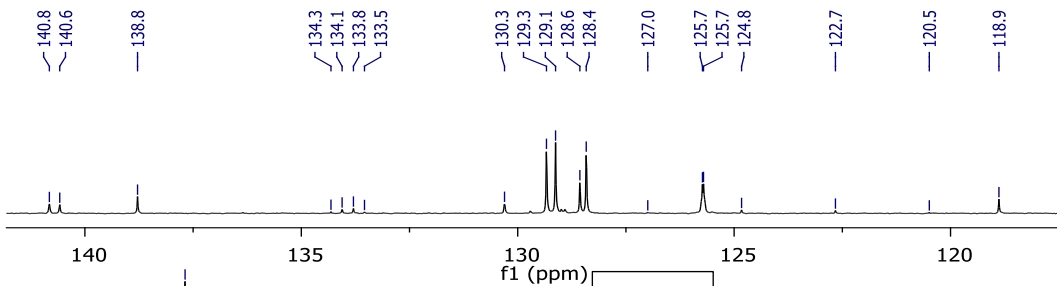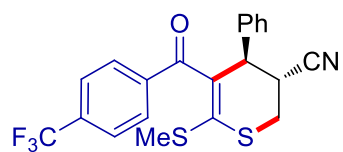

**6i** (CDCl<sub>3</sub>, 125 MHz)

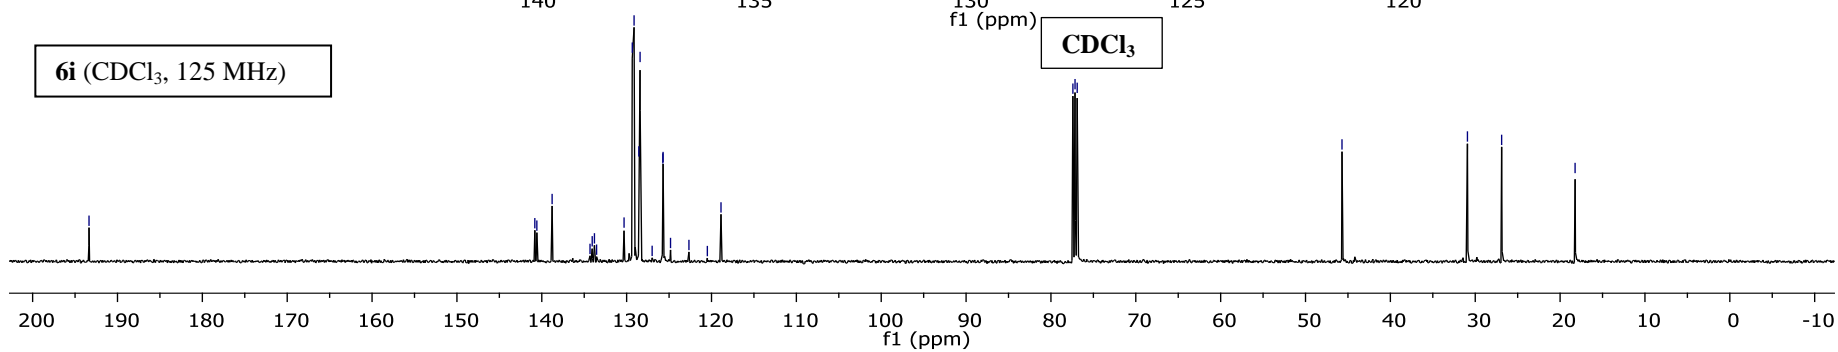

**$^1\text{H}$  (500 MHz,  $\text{CDCl}_3$ ) and  $^{13}\text{C}$ ( $^1\text{H}$ ) (125 MHz,  $\text{CDCl}_3$ ) NMR of Compound **6j****

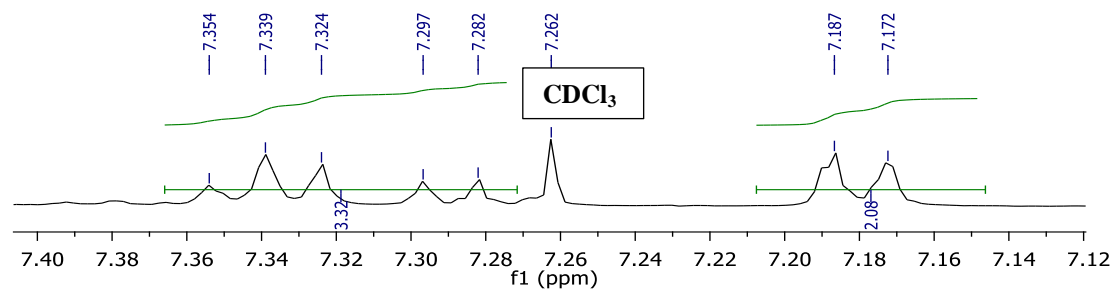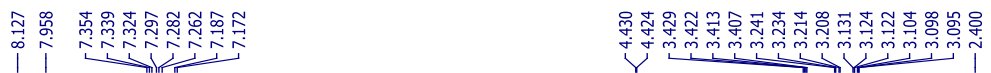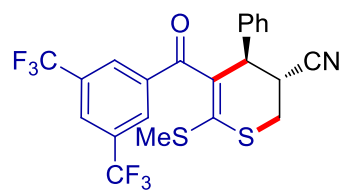

**6j** ( $\text{CDCl}_3$ , 500 MHz)

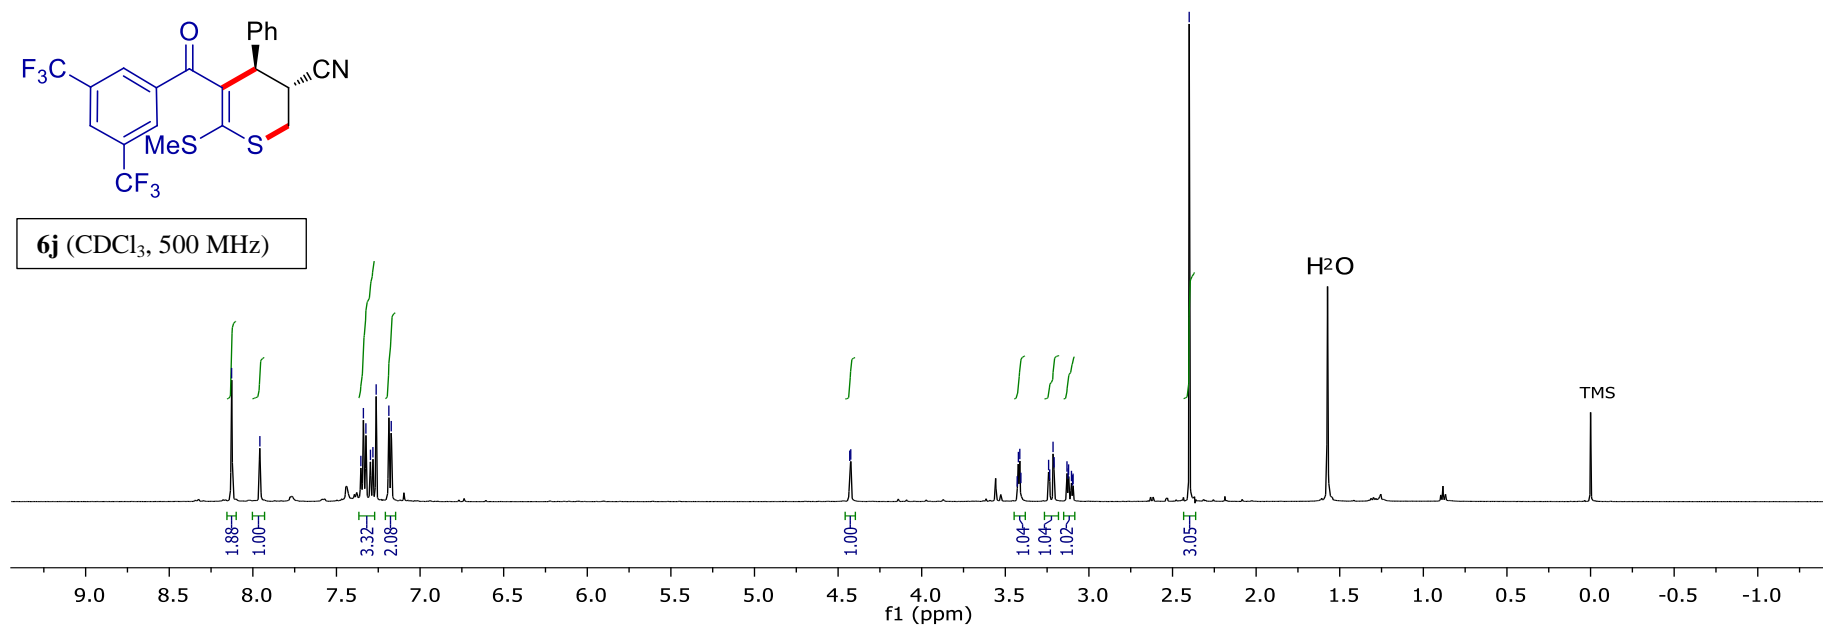

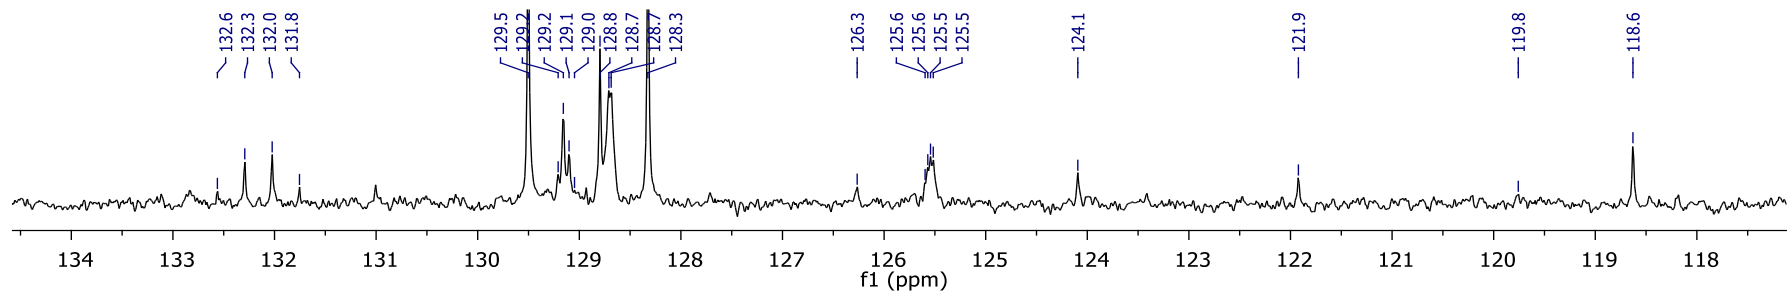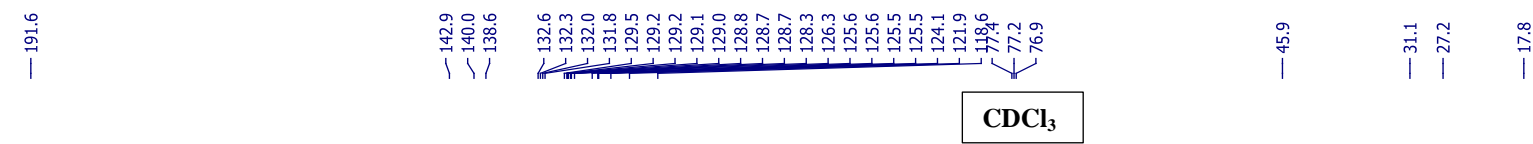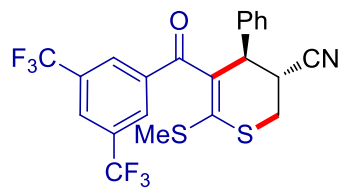

**6j** (CDCl<sub>3</sub>, 125 MHz)

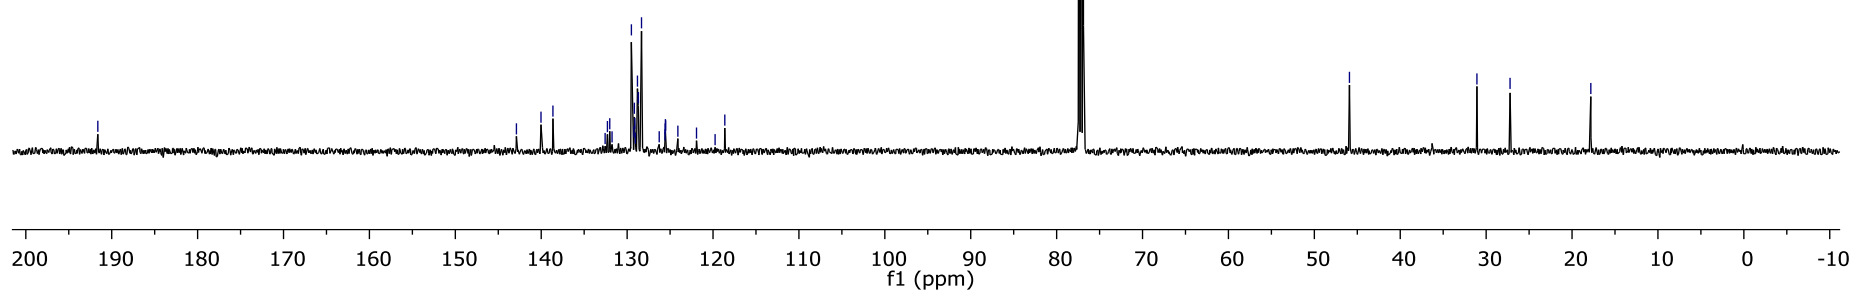

**$^1\text{H}$  (500 MHz,  $\text{CDCl}_3$ ) and  $^{13}\text{C}$ ( $^1\text{H}$ ) (125 MHz,  $\text{CDCl}_3$ ) NMR of Compound **6k****

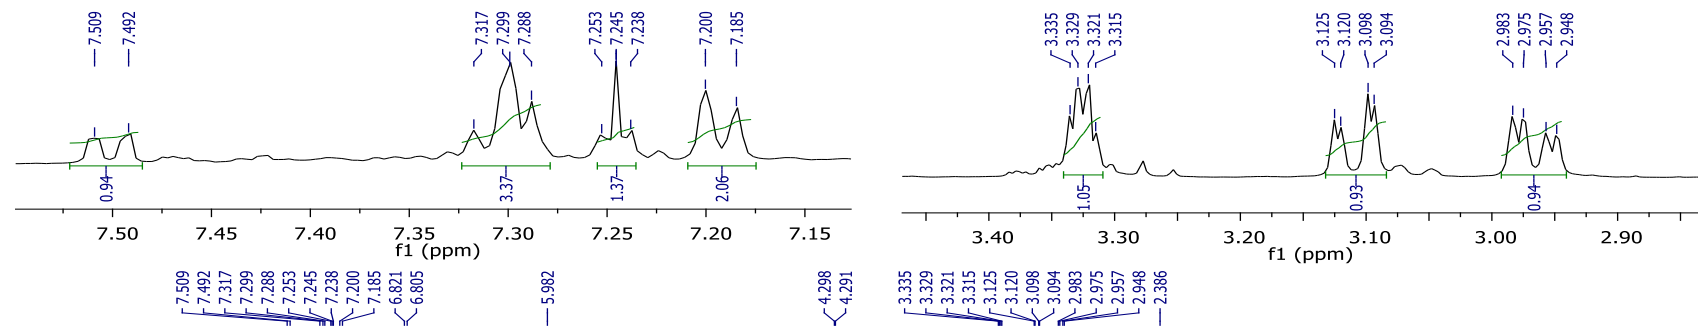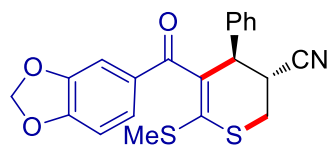

**6k** ( $\text{CDCl}_3$ , 500 MHz)

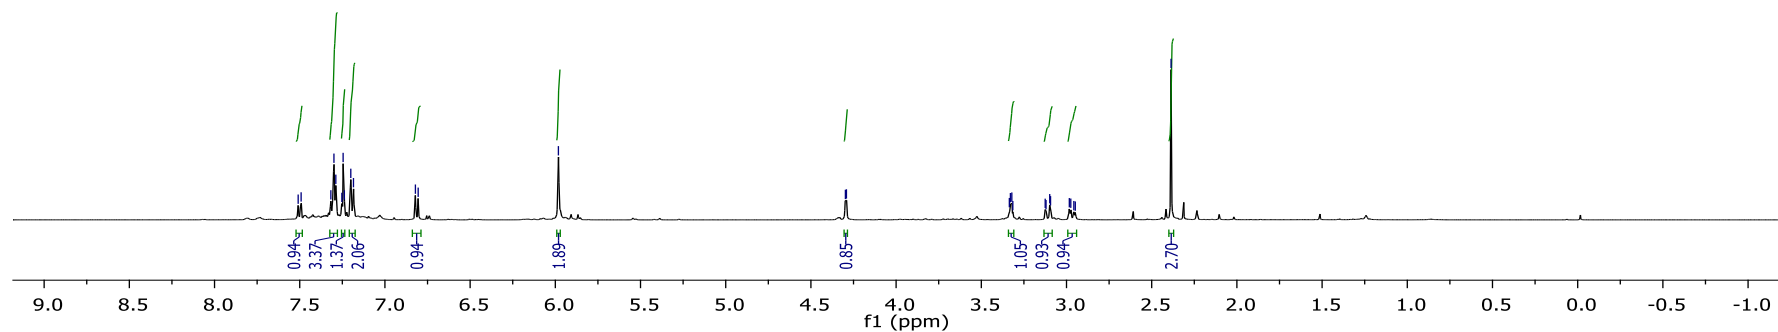



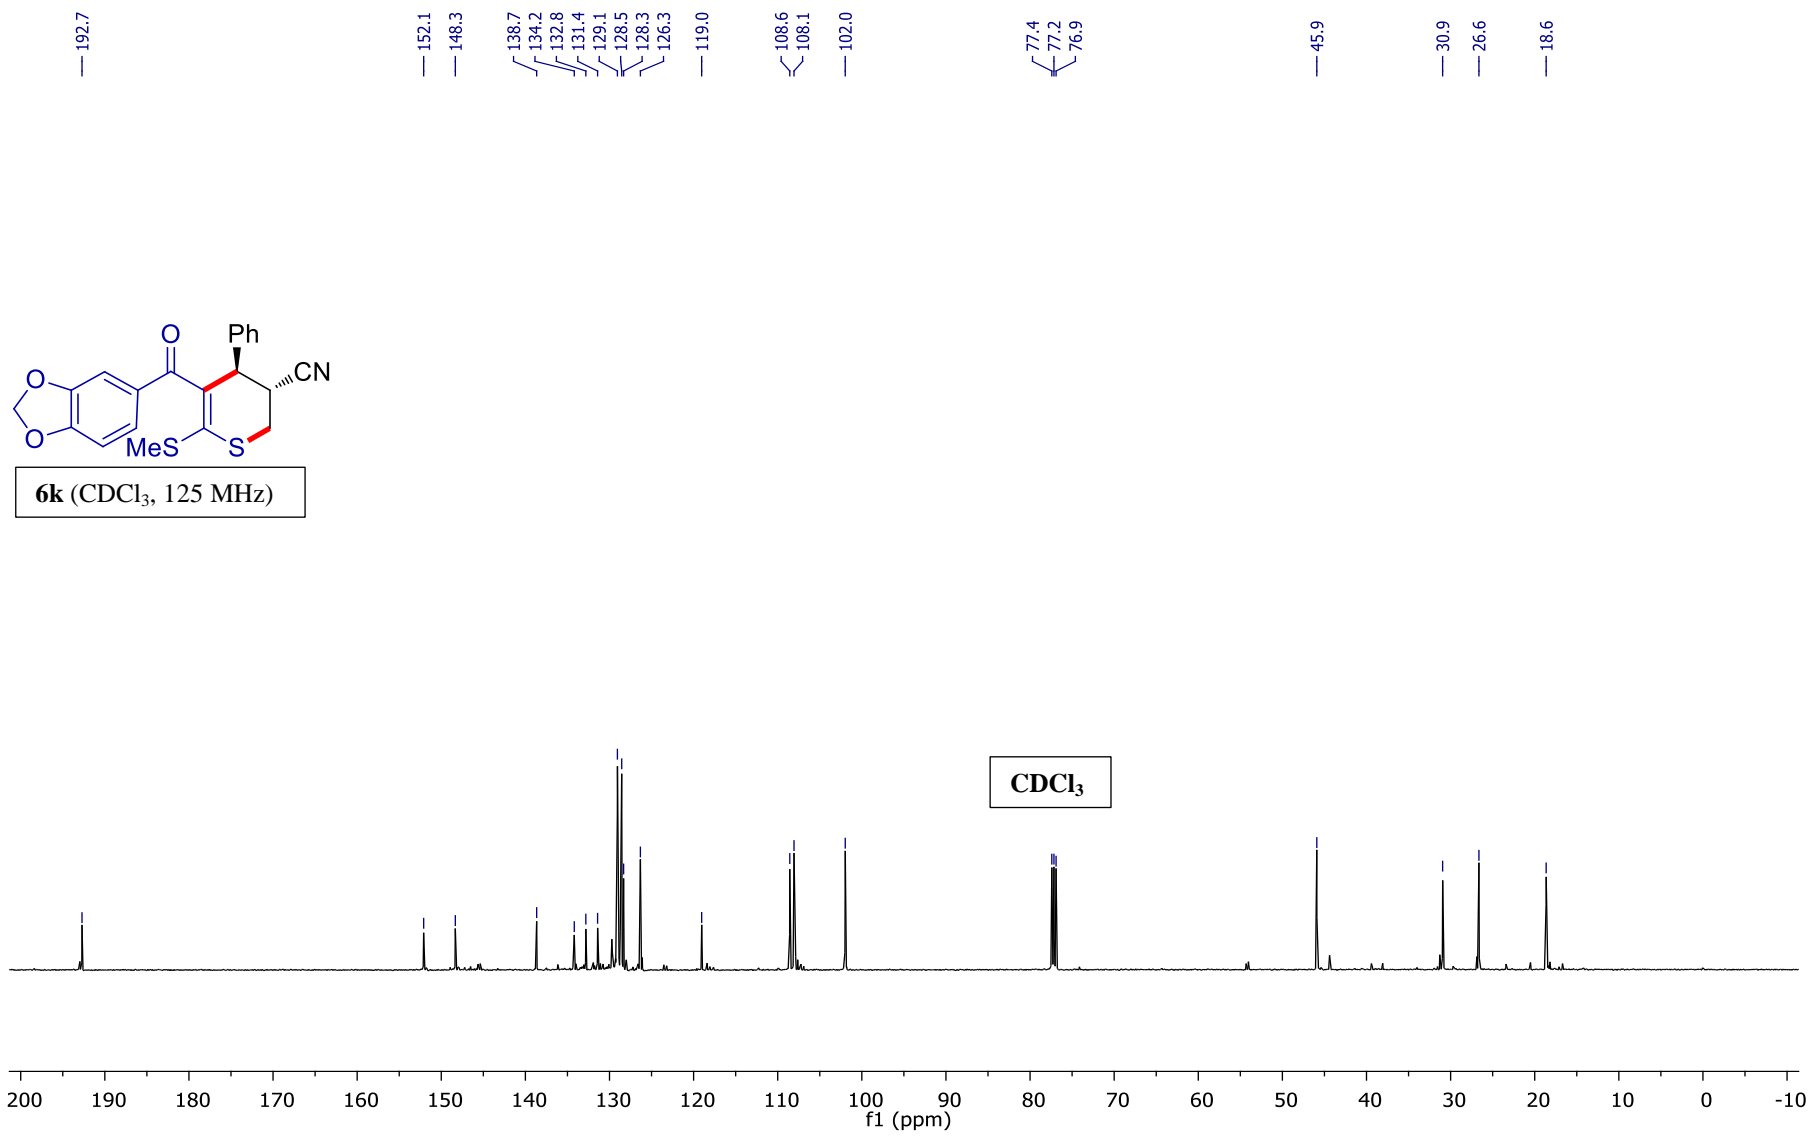

**$^1\text{H}$  (500 MHz,  $\text{CDCl}_3$ ) and  $^{13}\text{C}$ ( $^1\text{H}$ ) (125 MHz,  $\text{CDCl}_3$ ) NMR of Compound **6l****

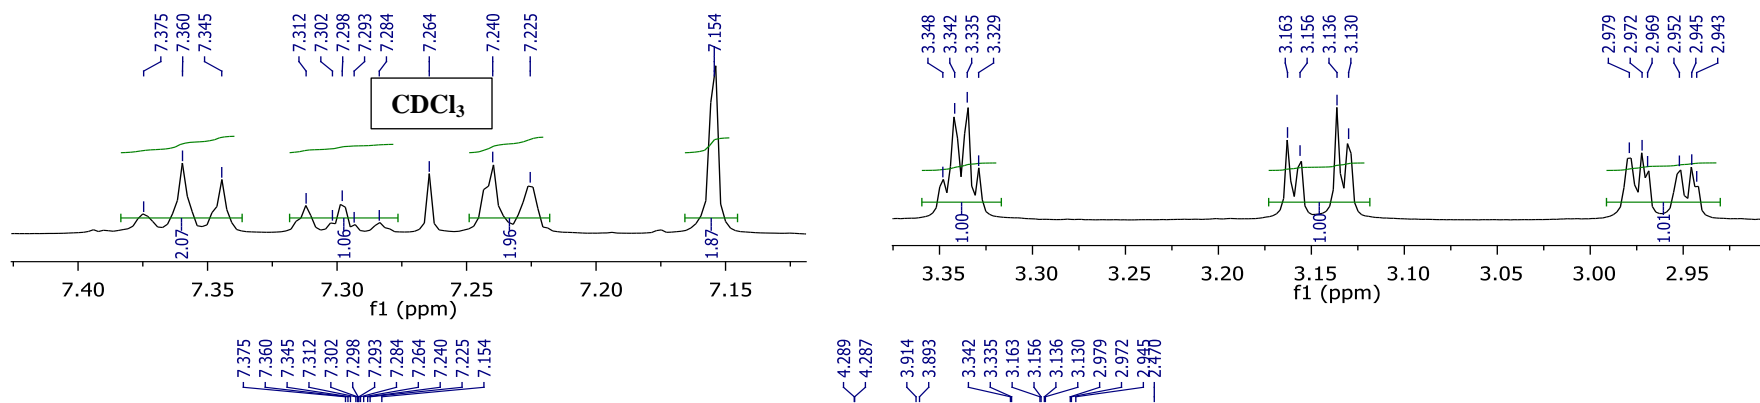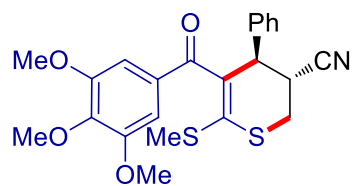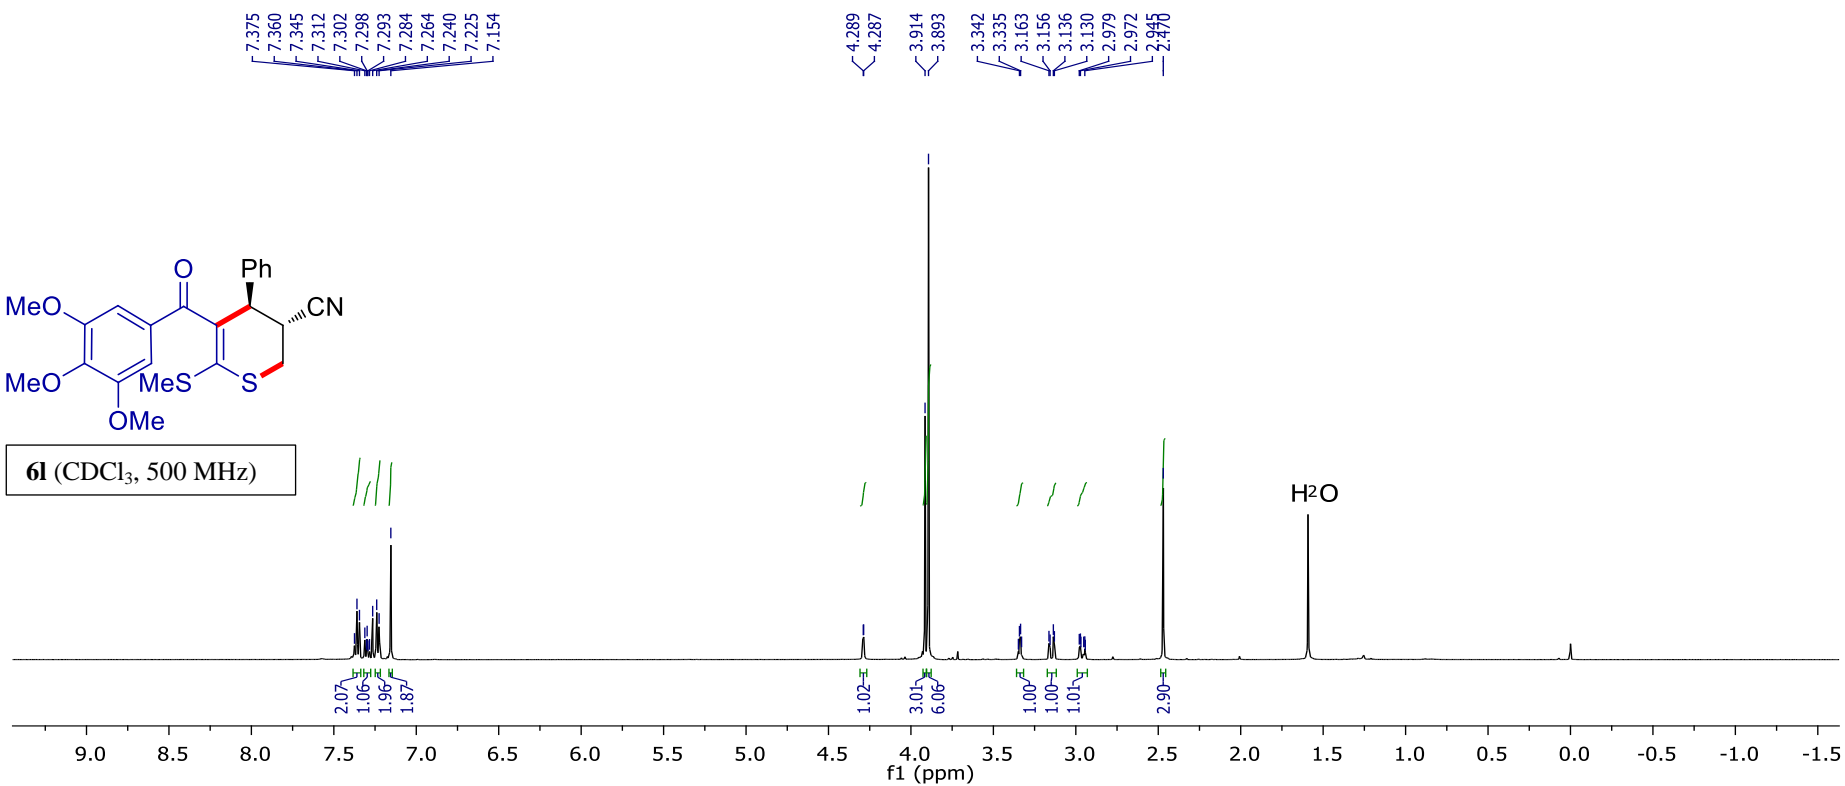

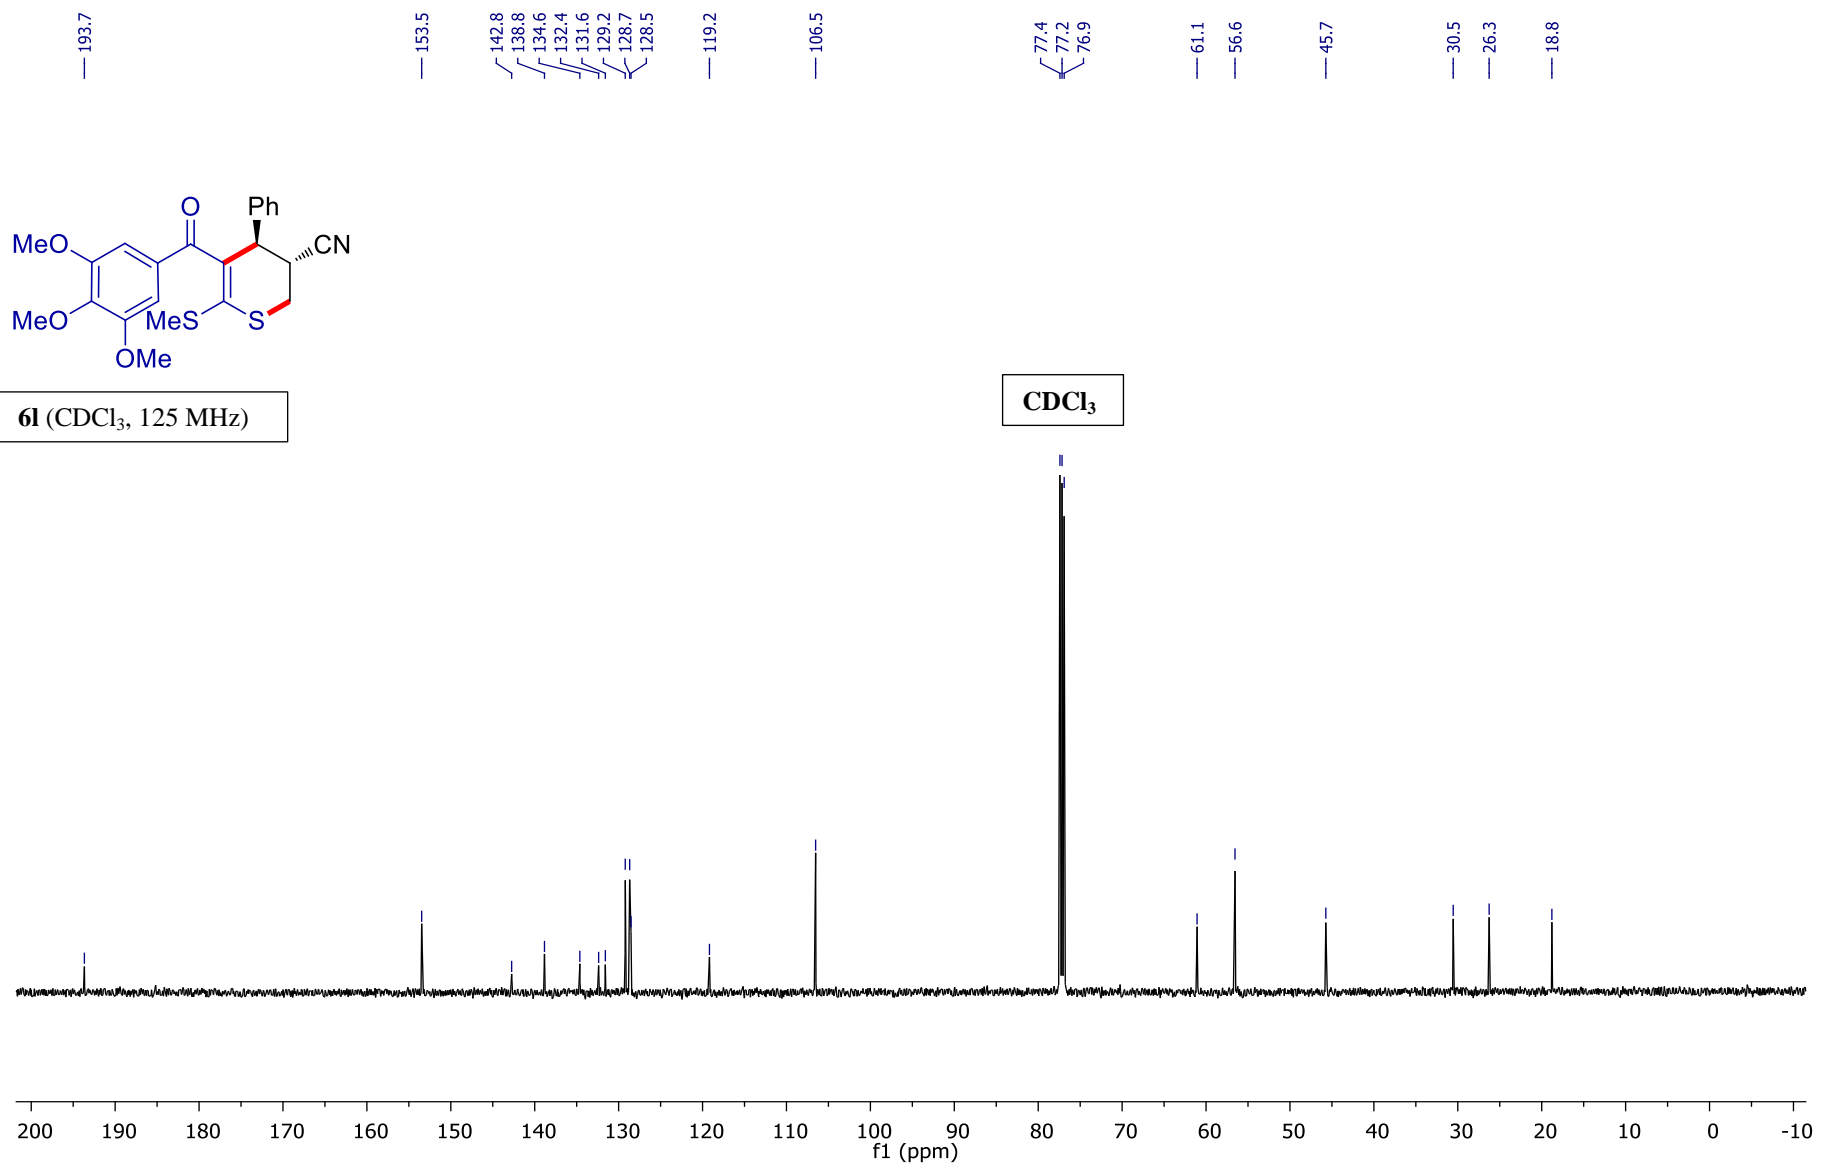

### COSY NMR of Compound 6l

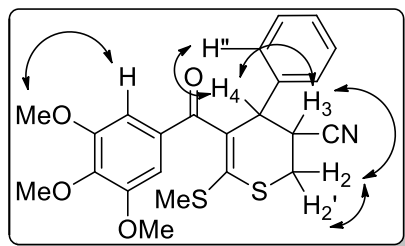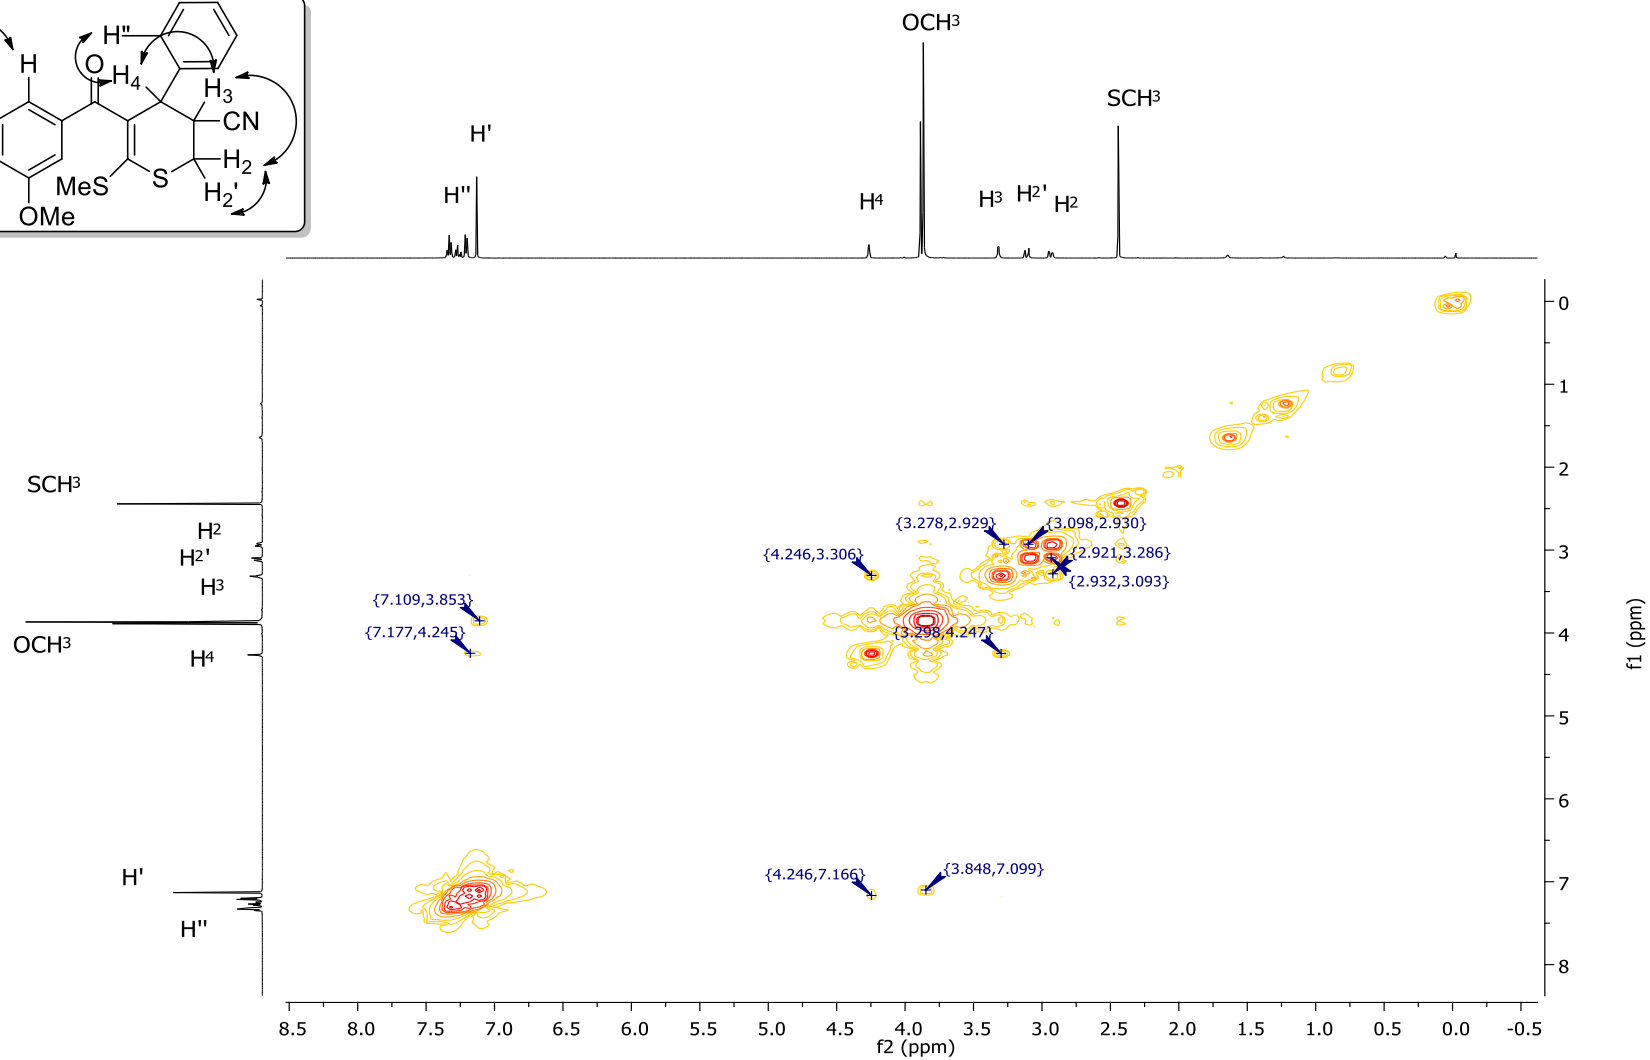

**$^1\text{H}$  (500 MHz,  $\text{CDCl}_3$ ) and  $^{13}\text{C}$ ( $^1\text{H}$ ) (125 MHz,  $\text{CDCl}_3$ ) NMR of Compound 6m**

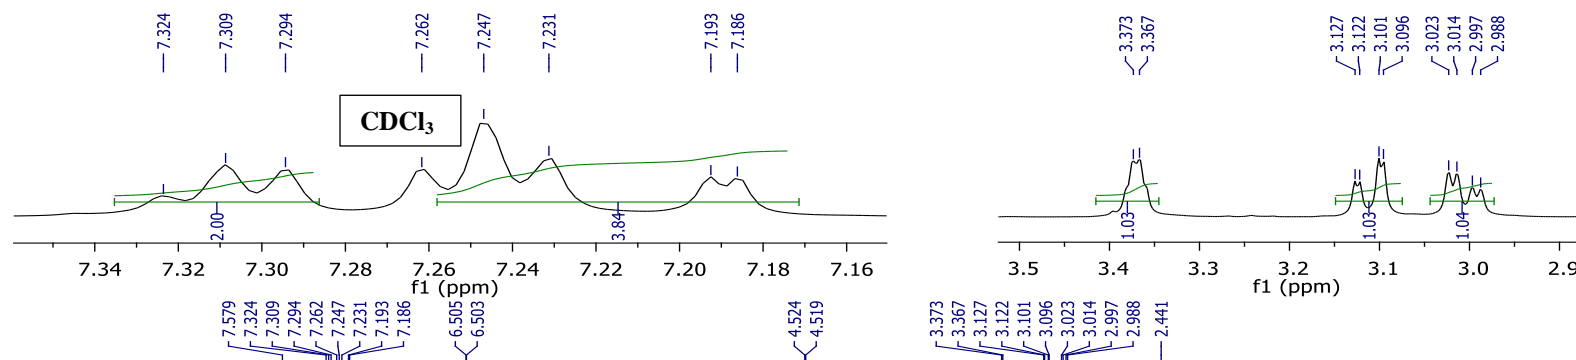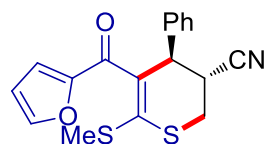

**6m** ( $\text{CDCl}_3$ , 500 MHz)

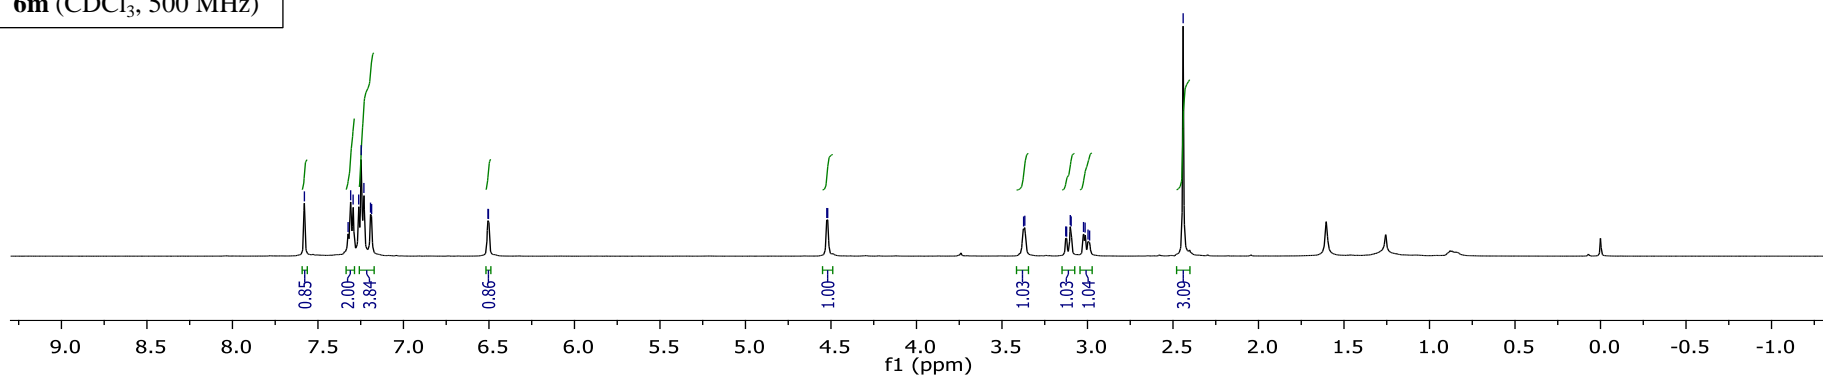

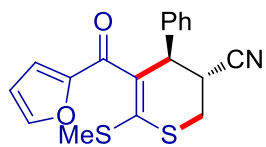

6m (CDCl<sub>3</sub>, 125 MHz)

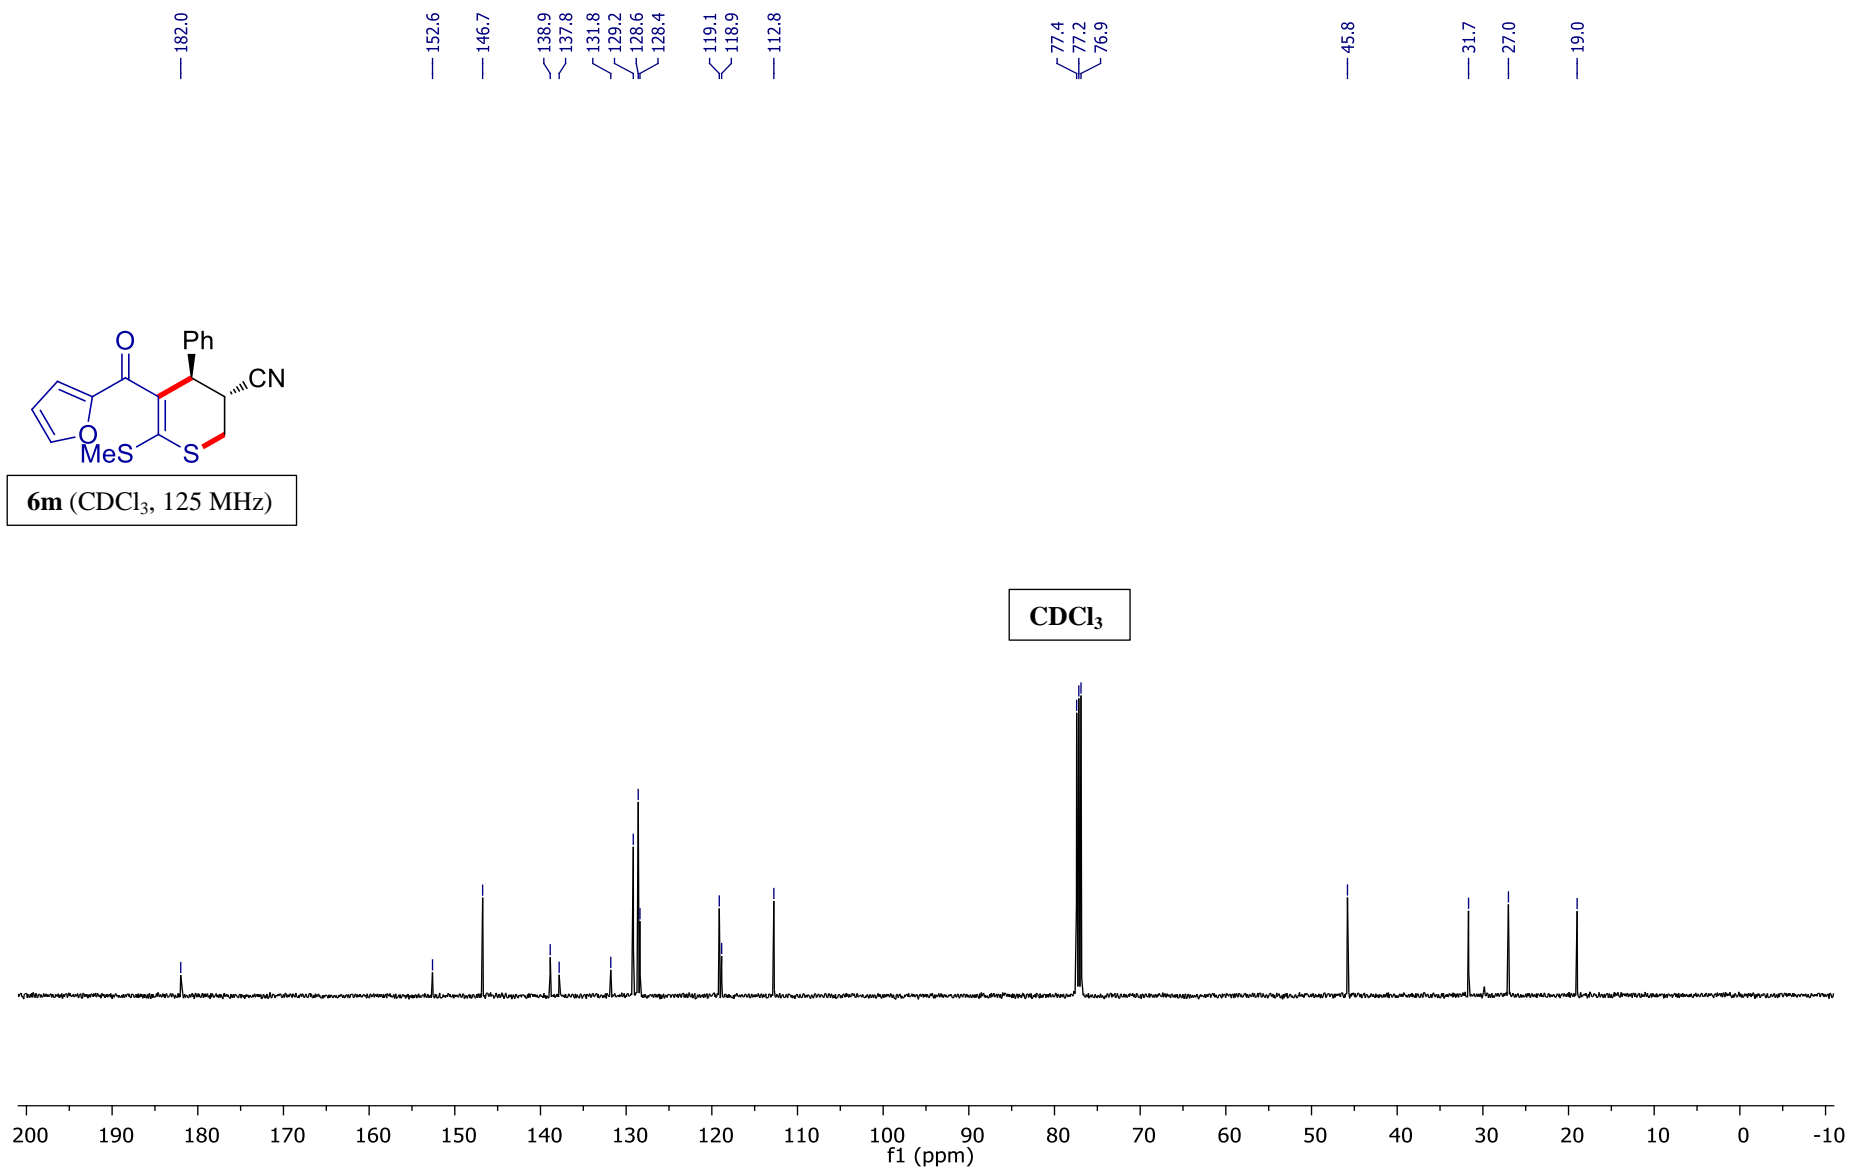

**$^1\text{H}$  (500 MHz,  $\text{CDCl}_3$ ) and  $^{13}\text{C}$ ( $^1\text{H}$ ) (125 MHz,  $\text{CDCl}_3$ ) NMR of Compound **6n****

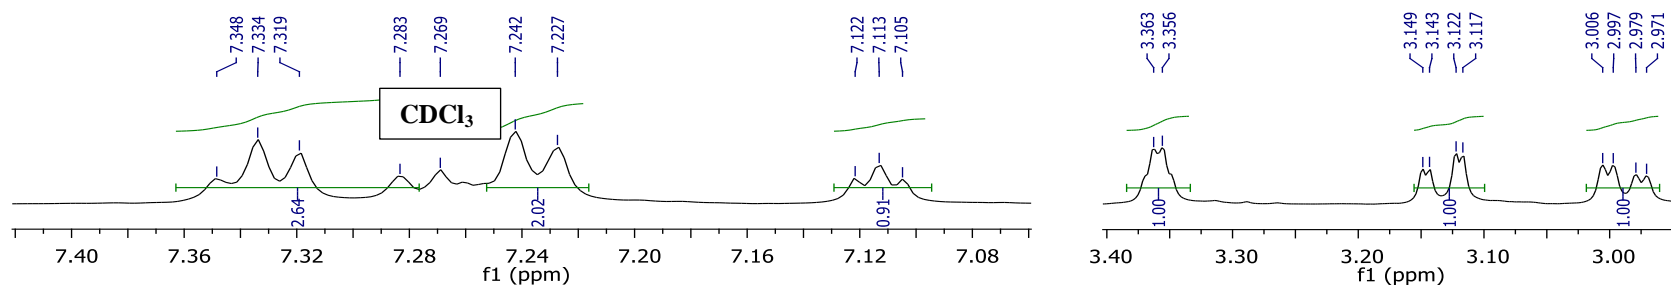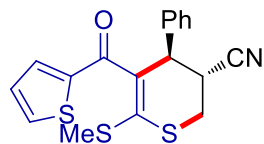

**6n** ( $\text{CDCl}_3$ , 500 MHz)

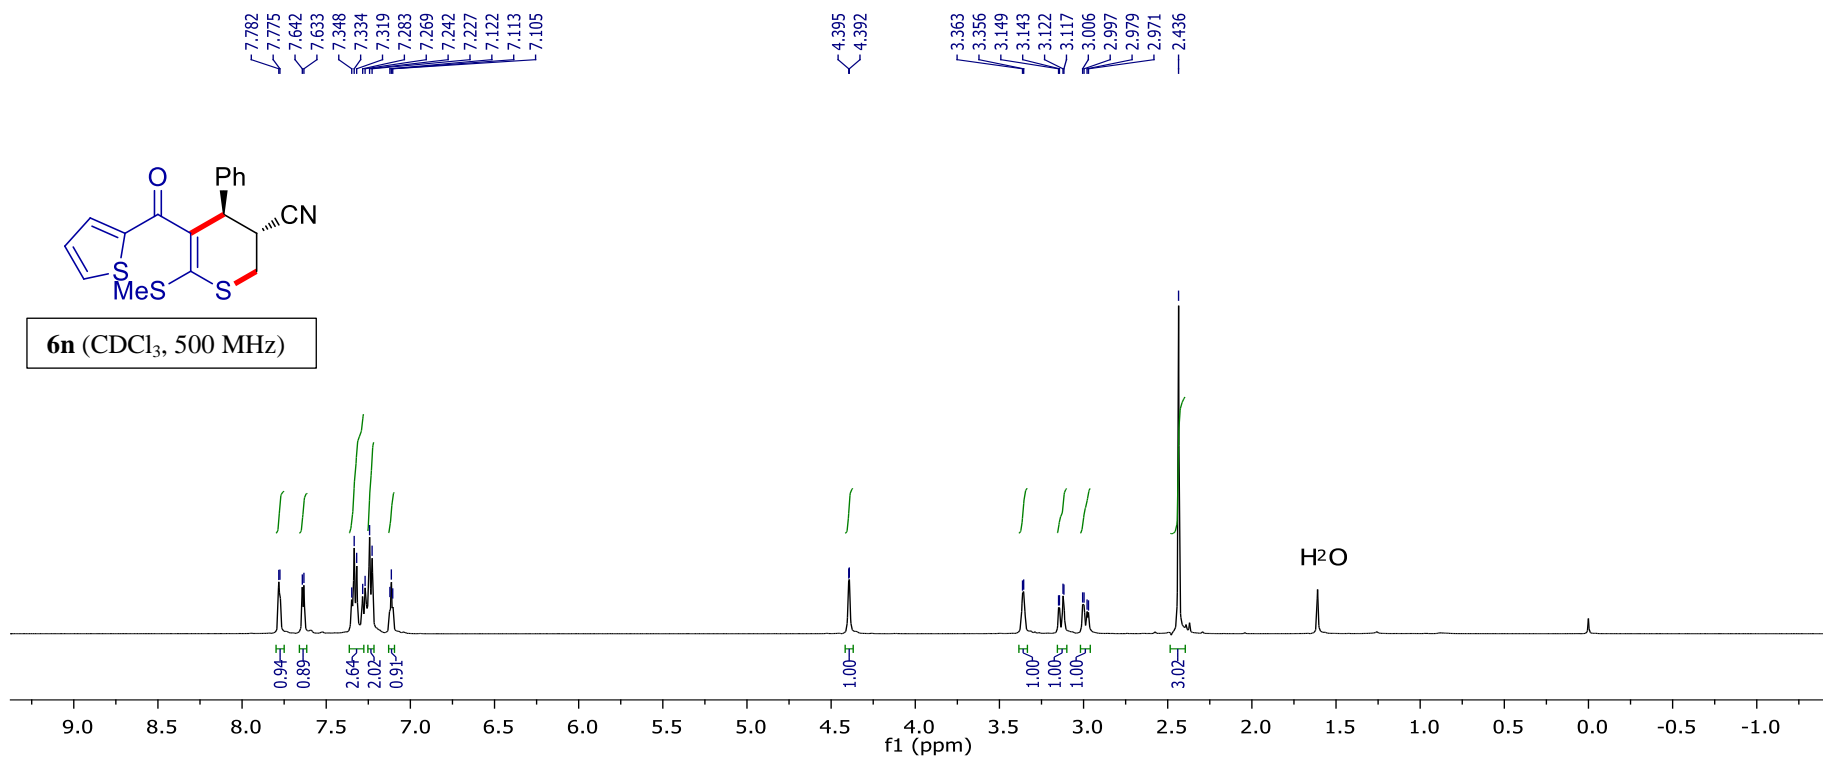

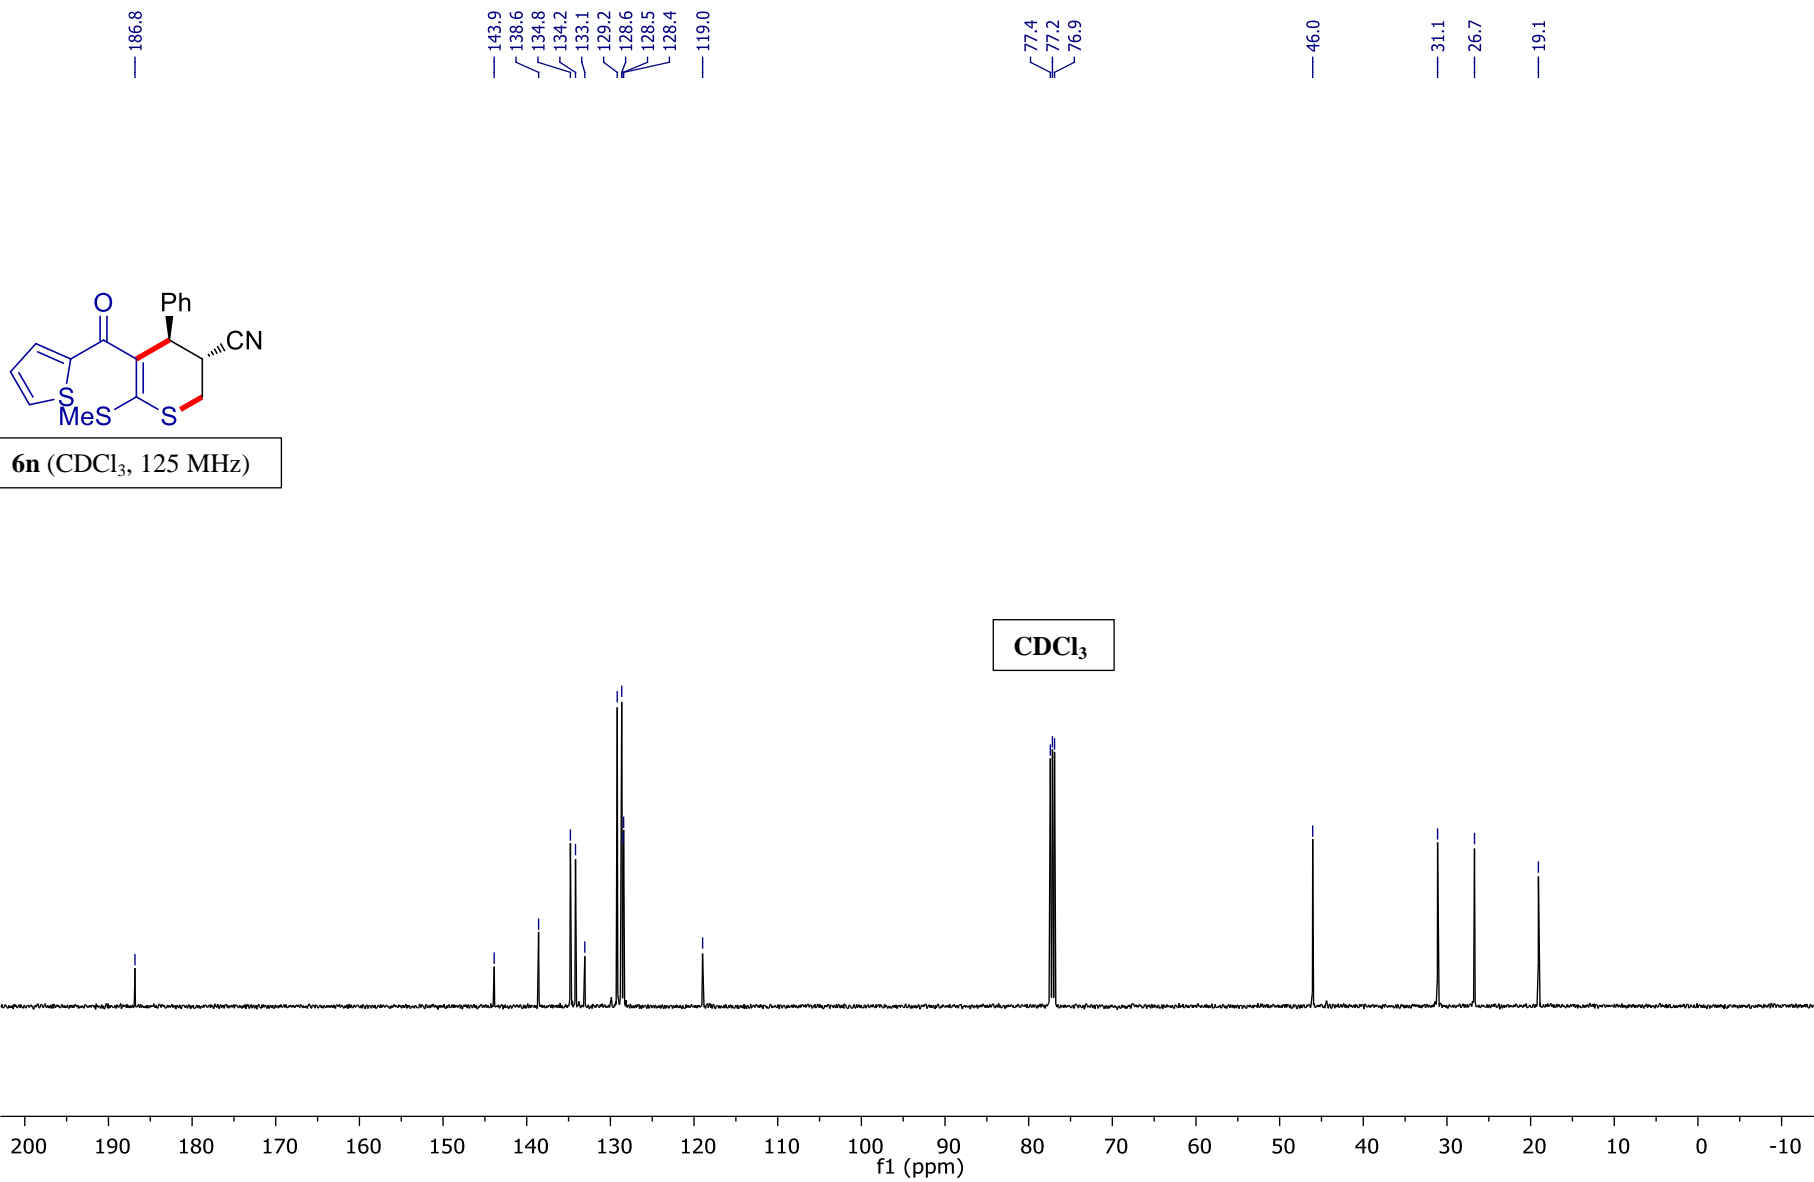



### DEPT-45 NMR of Compound 6n

134.8  
134.1  
129.2  
128.6  
128.4  
128.4

46.0

31.1

26.7

19.0

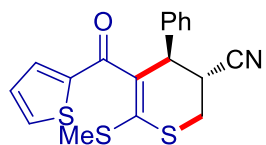

6n DEPT-45 (CDCl<sub>3</sub>, 125 MHz)

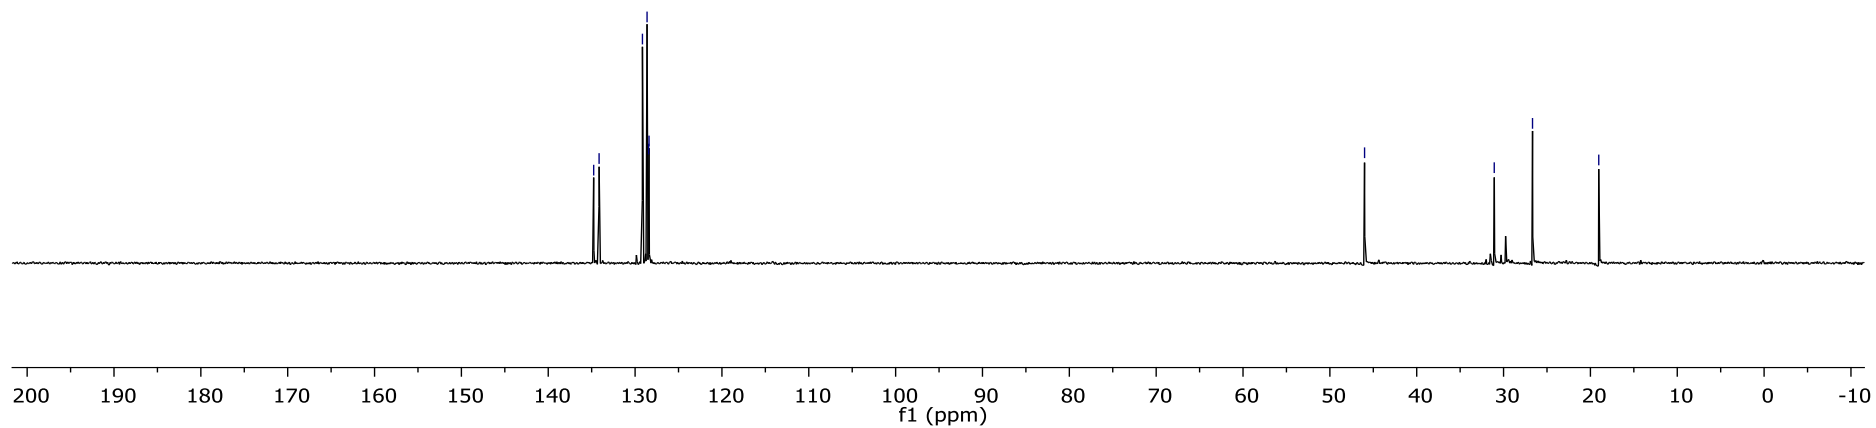

### DEPT-90 NMR of Compound 6n

134.8  
134.1  
129.2  
128.6  
128.4  
128.4

46.0

31.1

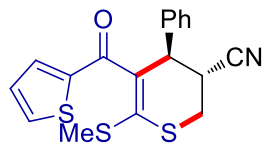

6n DEPT-90 (CDCl<sub>3</sub>, 125 MHz)

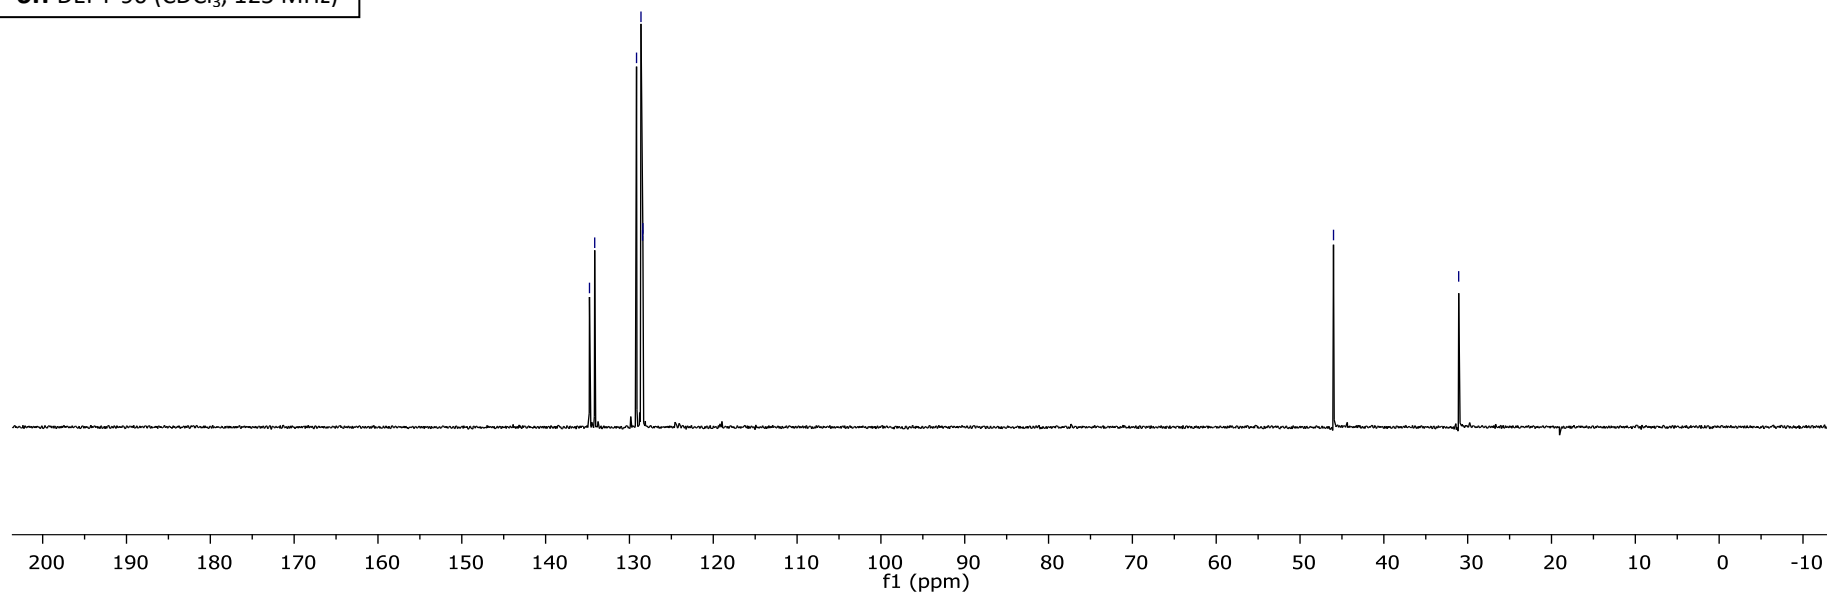

### DEPT-135 NMR of Compound 6n

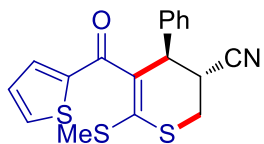

6n DEPT-135 (CDCl<sub>3</sub>, 125 MHz)

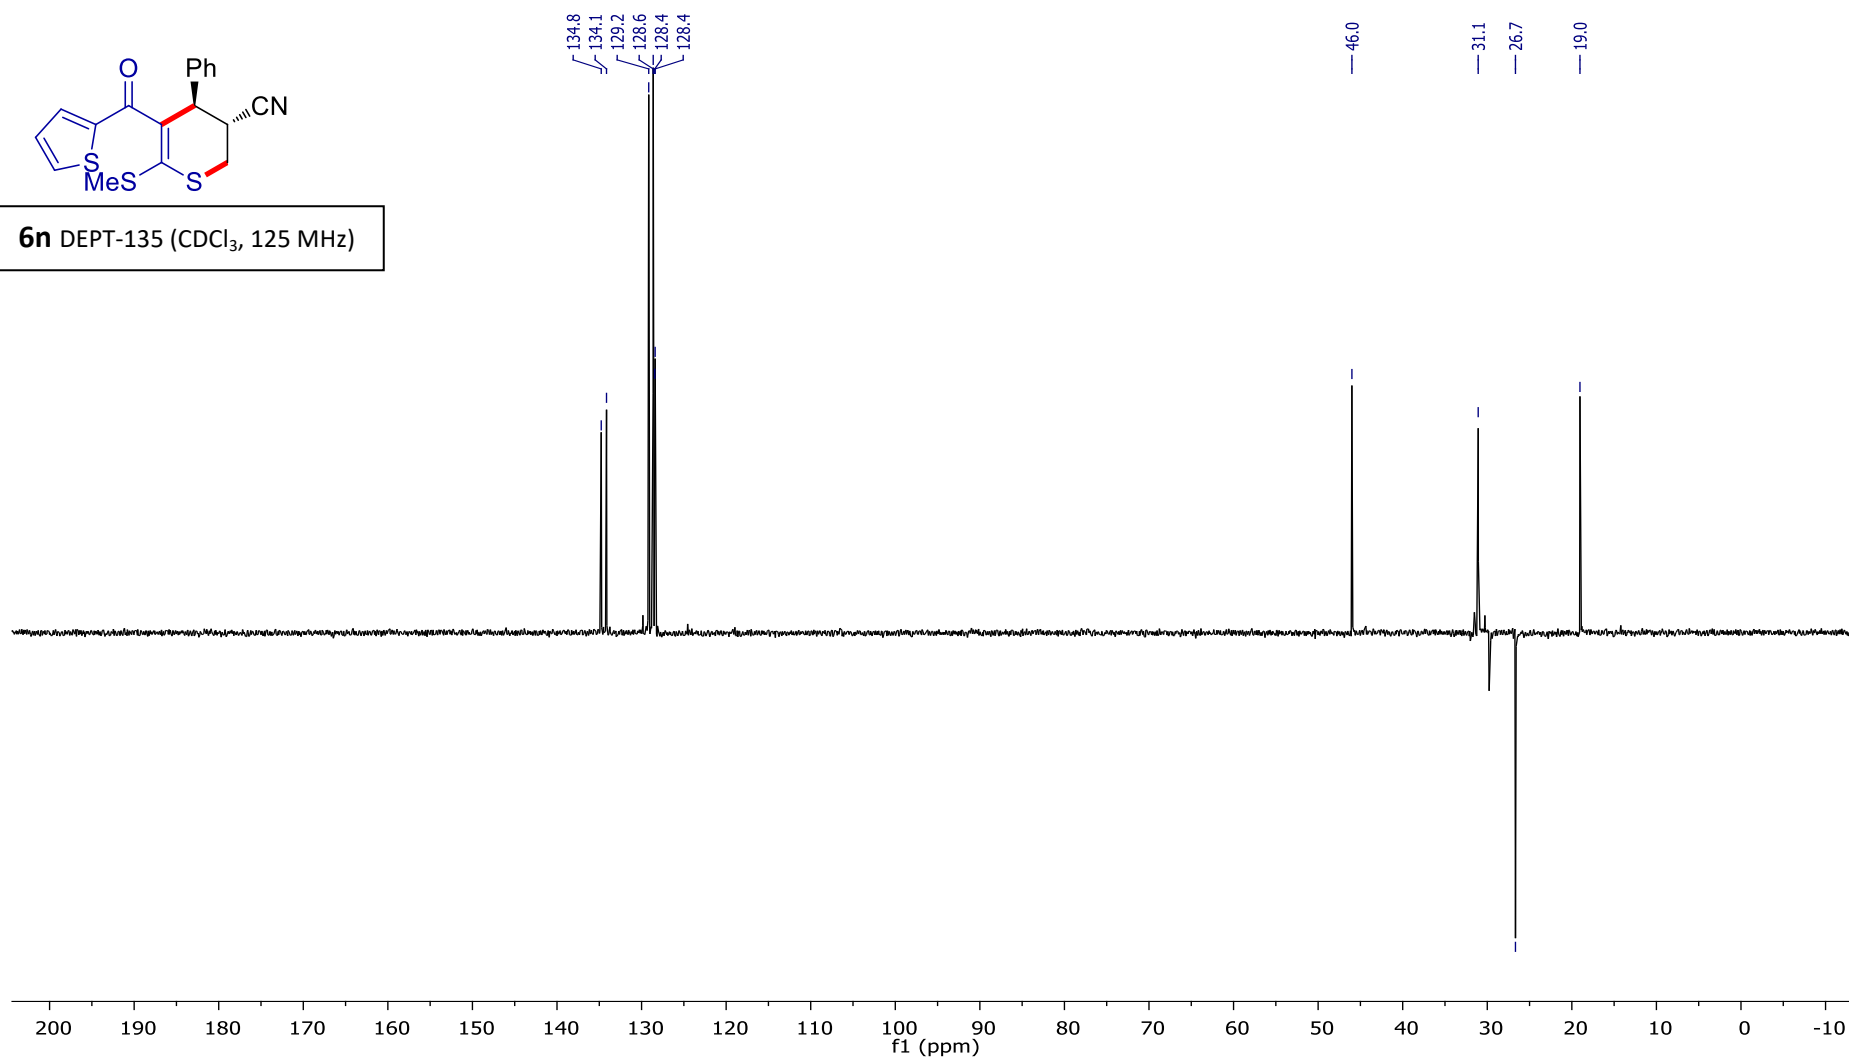

**$^1\text{H}$  (500 MHz,  $\text{CDCl}_3$ ) and  $^{13}\text{C}$ ( $^1\text{H}$ ) (125 MHz,  $\text{CDCl}_3$ ) NMR of Compound 6o**

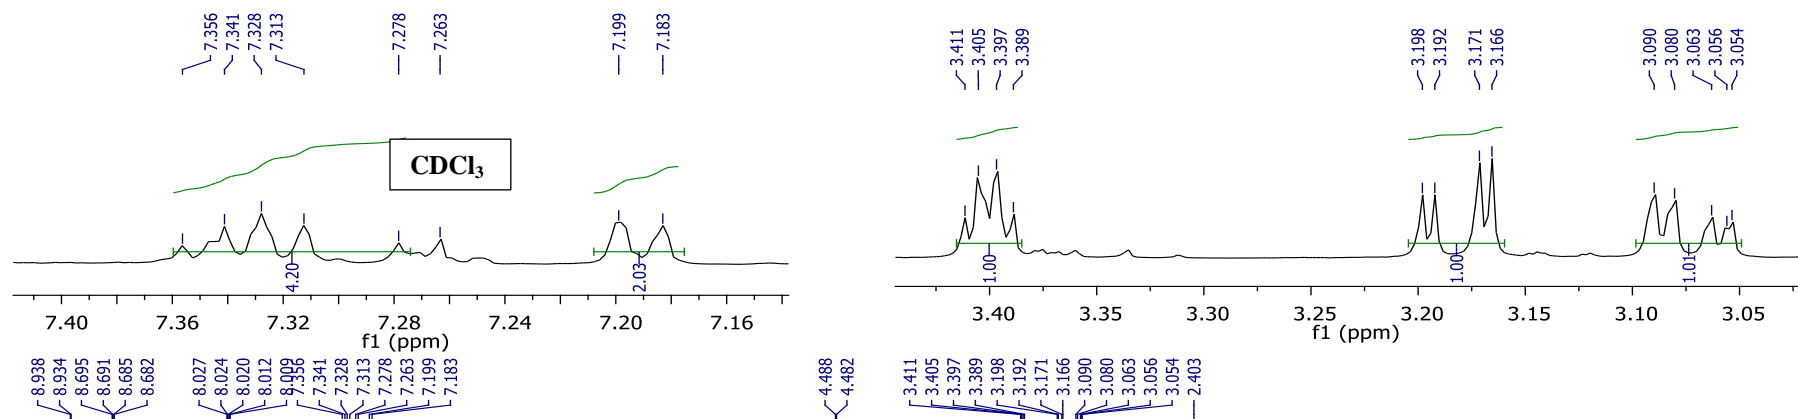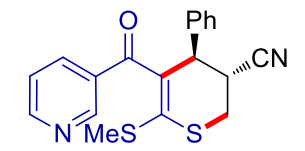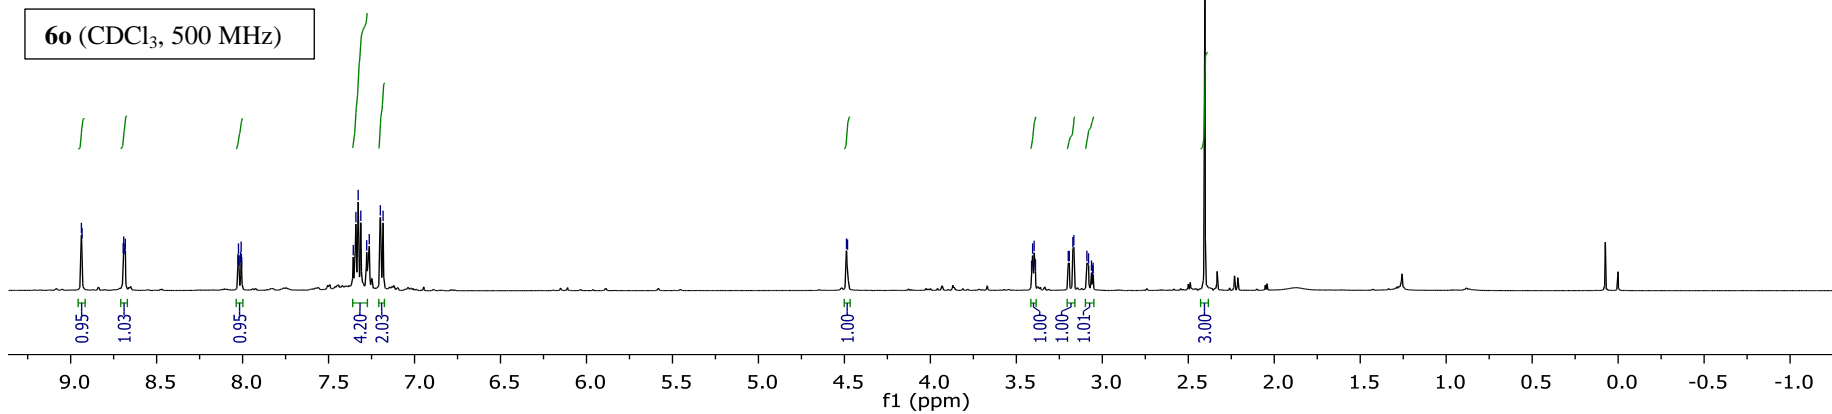

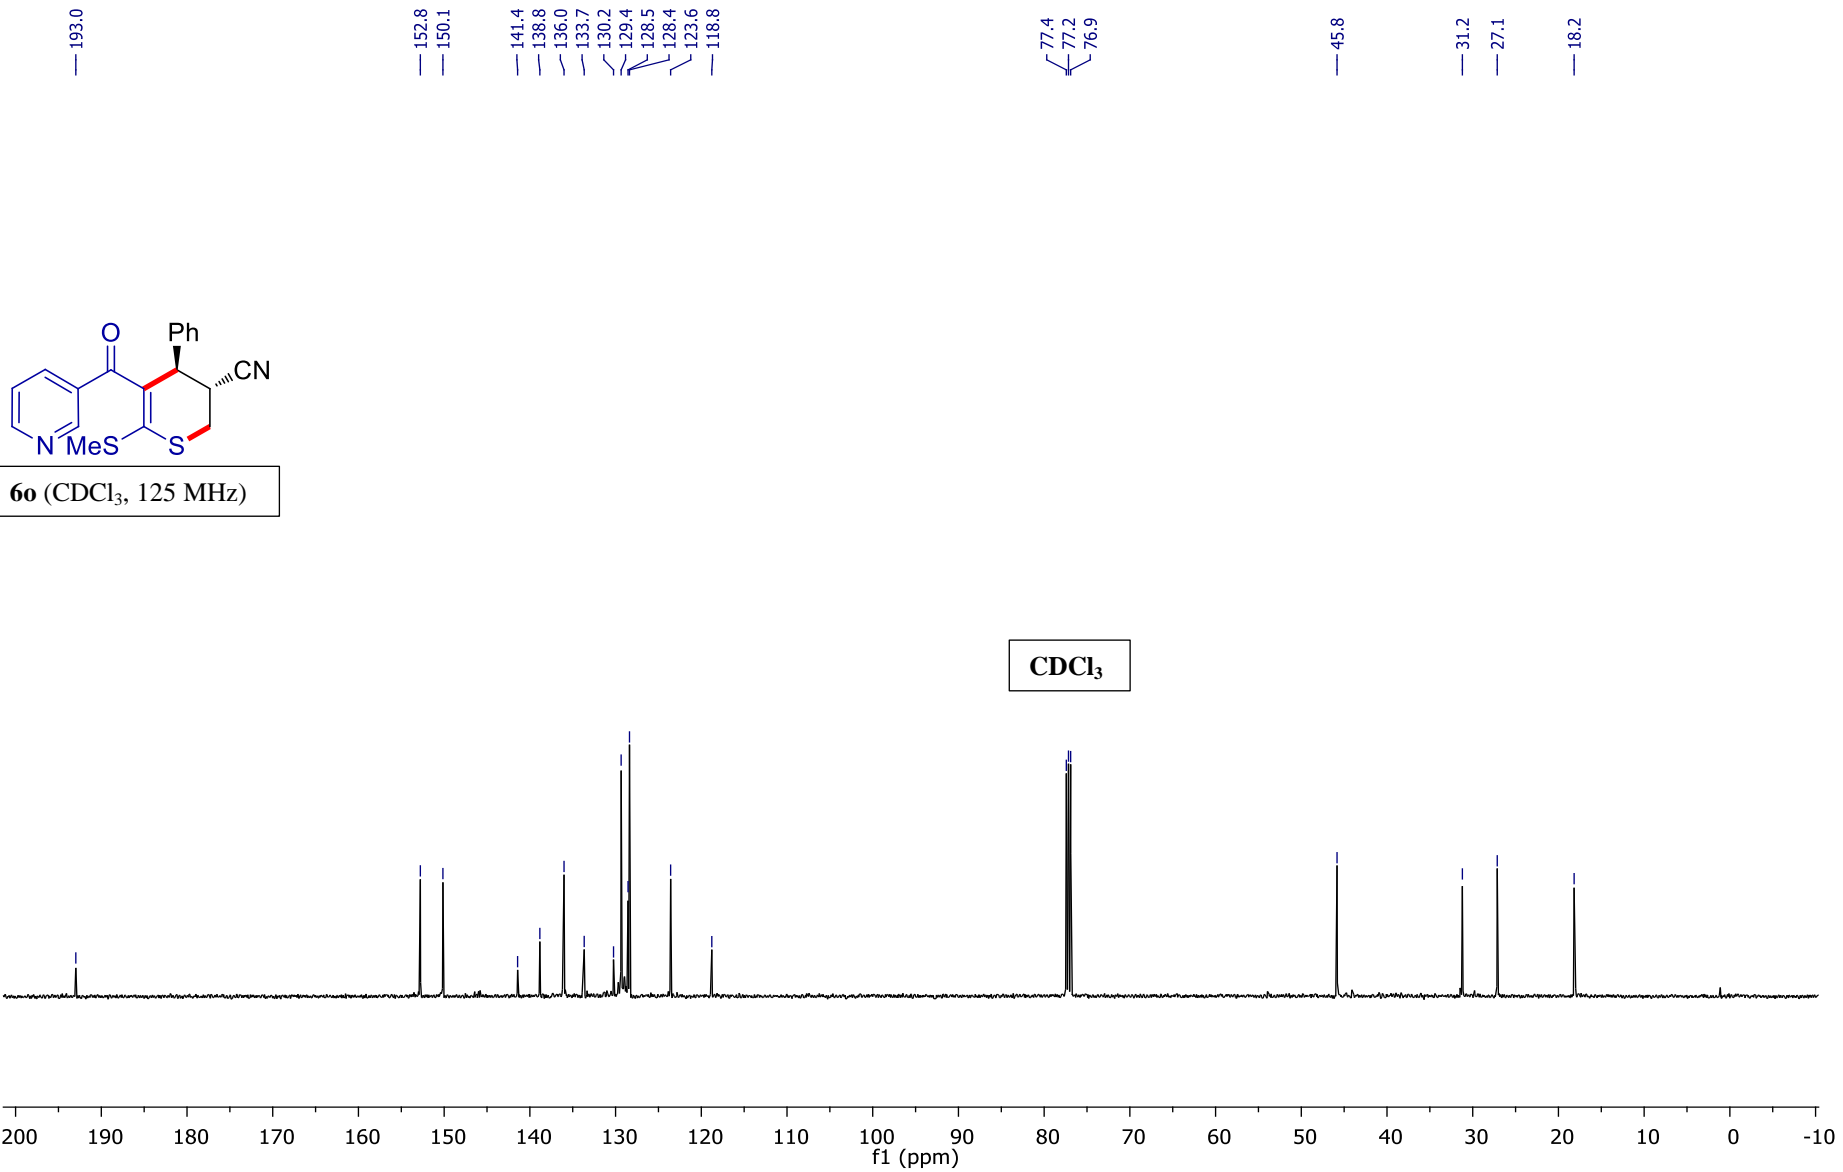

**$^1\text{H}$  (500 MHz,  $\text{CDCl}_3$ ) and  $^{13}\text{C}$ ( $^1\text{H}$ ) (125 MHz,  $\text{CDCl}_3$ ) NMR of Compound **6p****

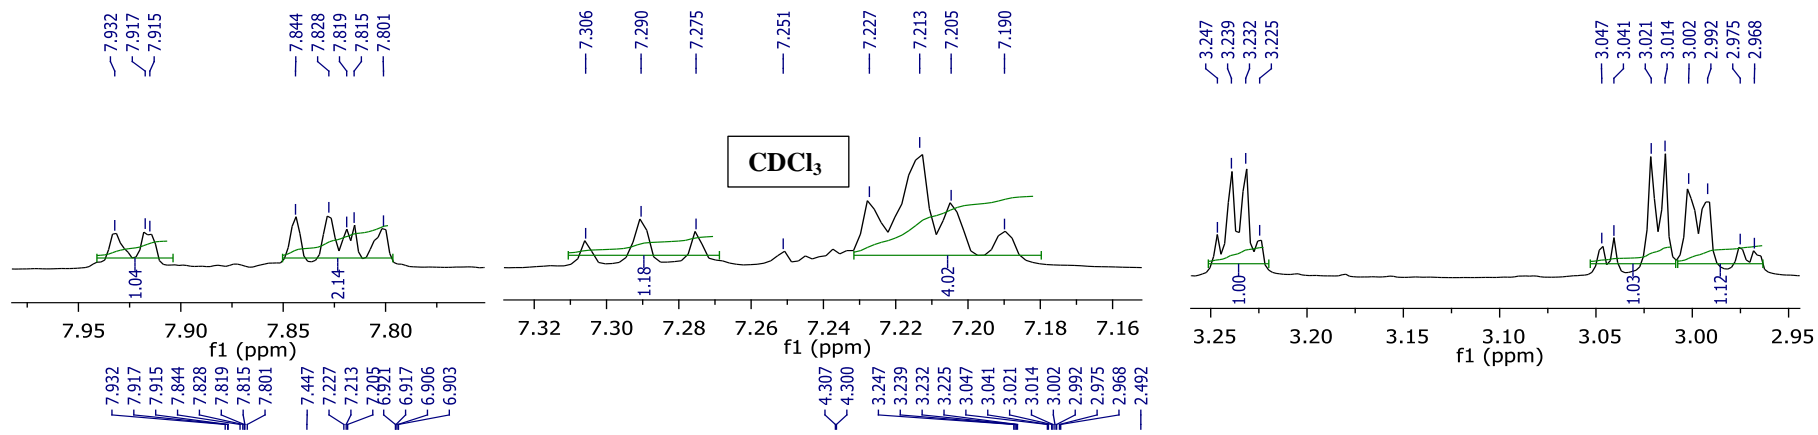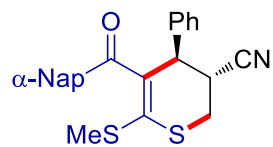

**6p** ( $\text{CDCl}_3$ , 500 MHz)

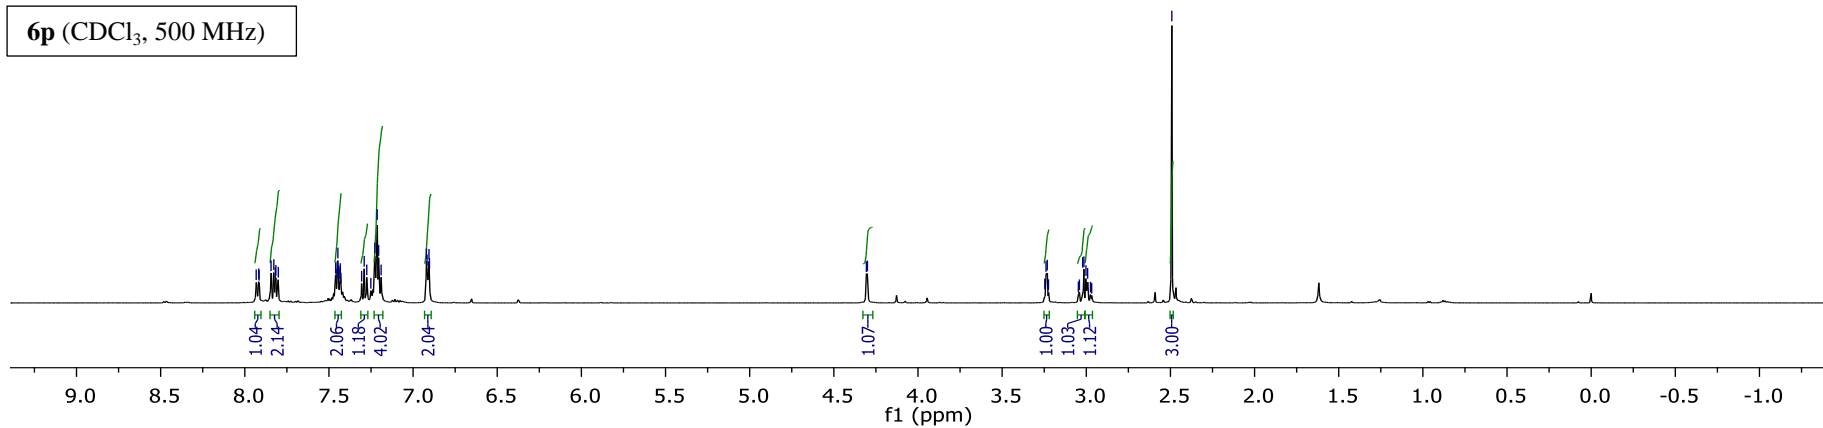

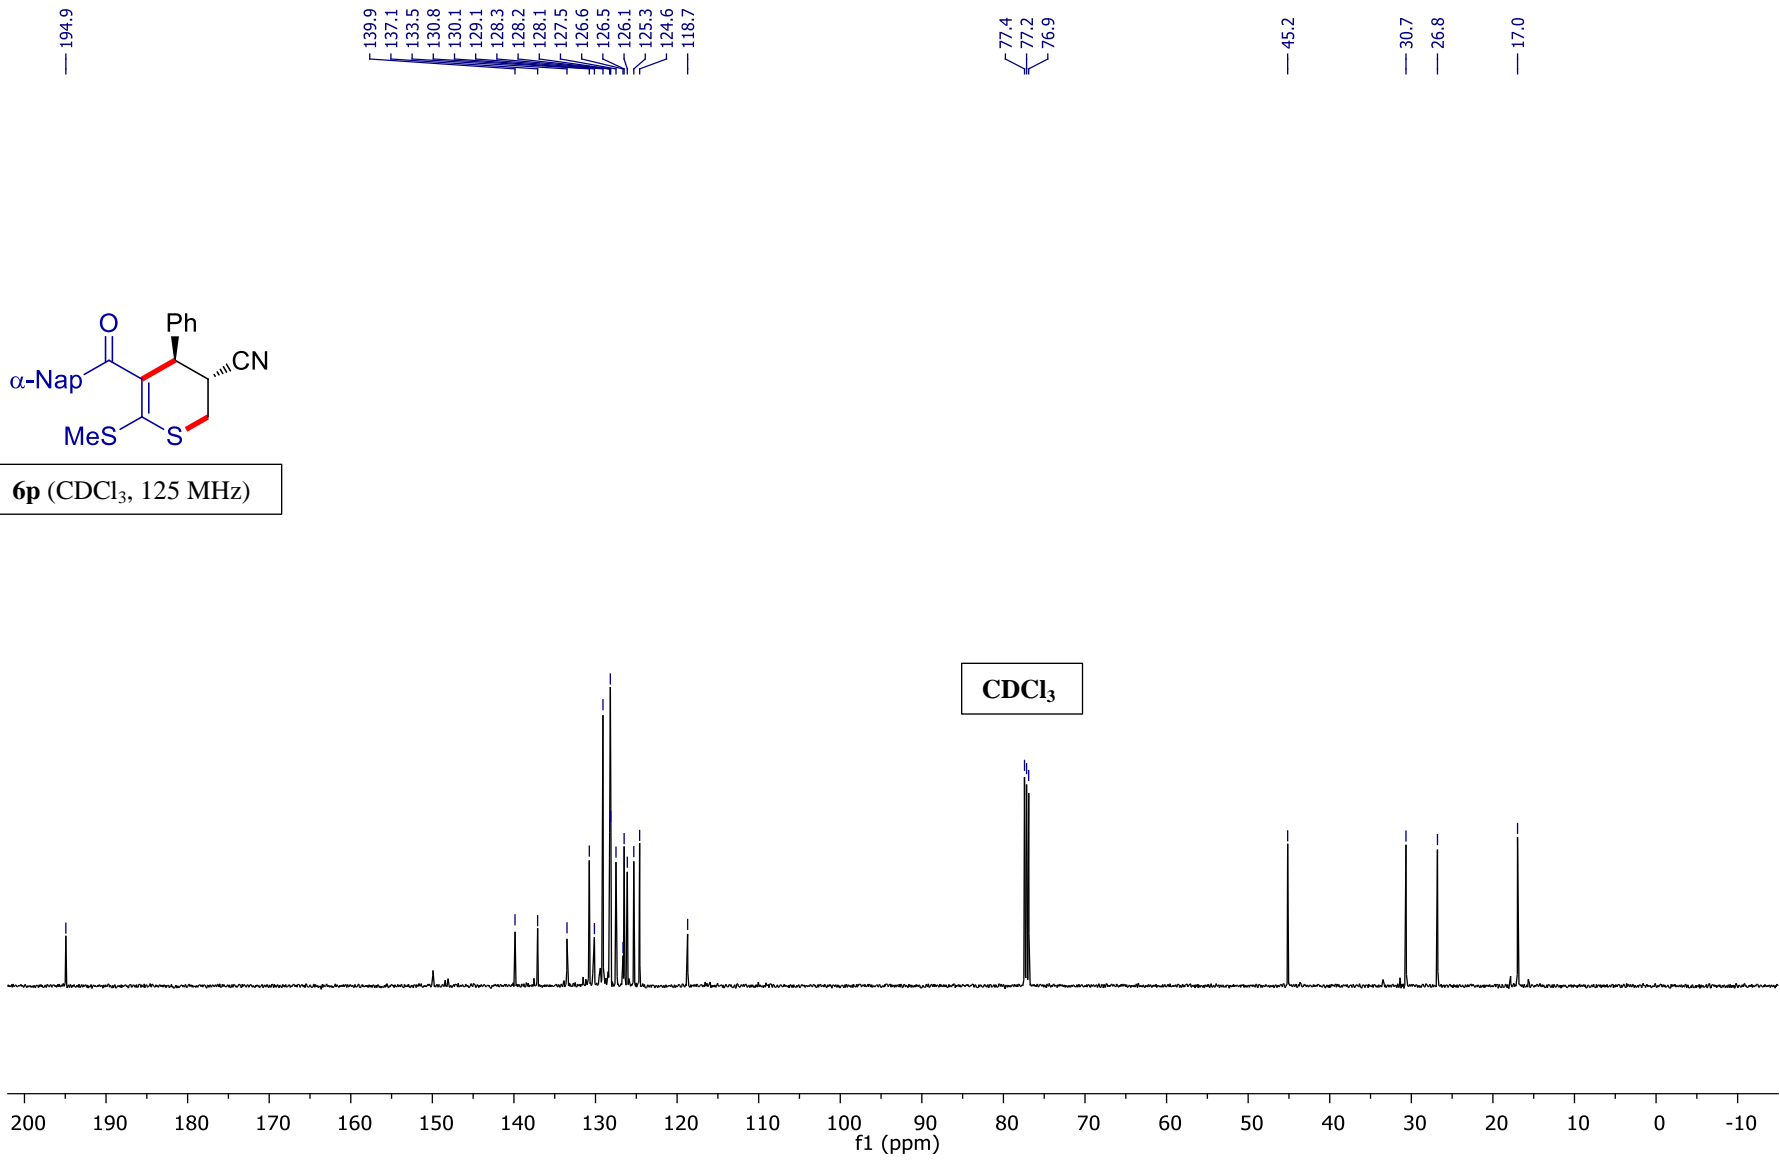

**$^1\text{H}$  - (500 MHz,  $\text{CDCl}_3$ ) and  $^{13}\text{C}$ ( $^1\text{H}$ ) (125 MHz,  $\text{CDCl}_3$ ) NMR of Compound 6q**

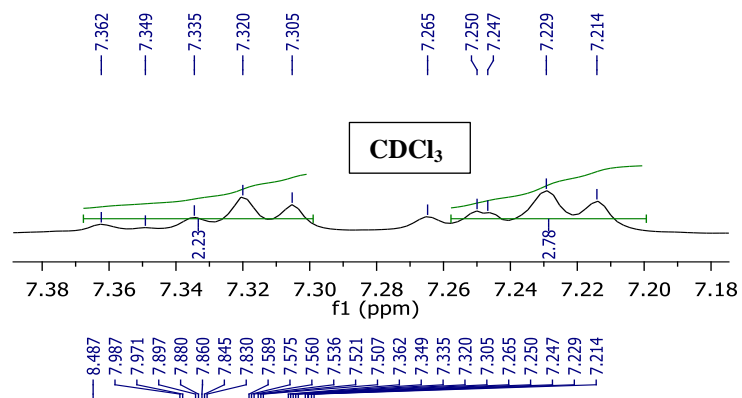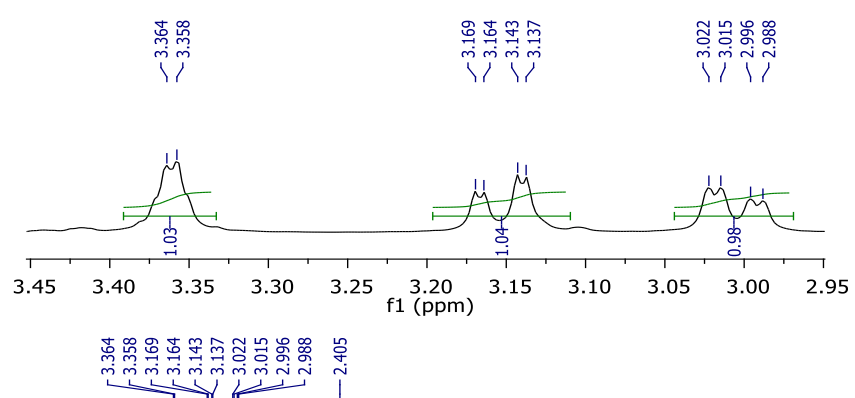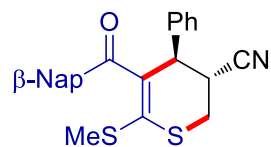

**6q** ( $\text{CDCl}_3$ , 500 MHz)

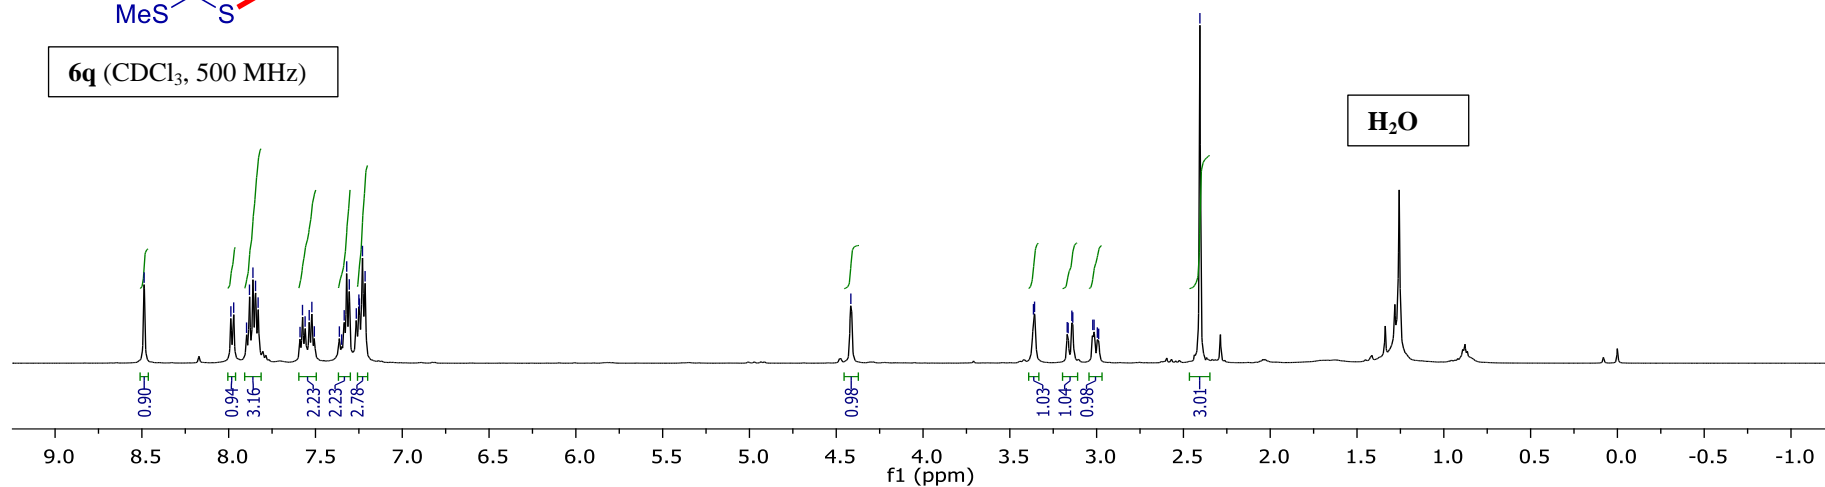



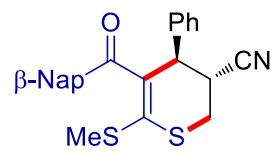

**6q** (CDCl<sub>3</sub>, 125 MHz)

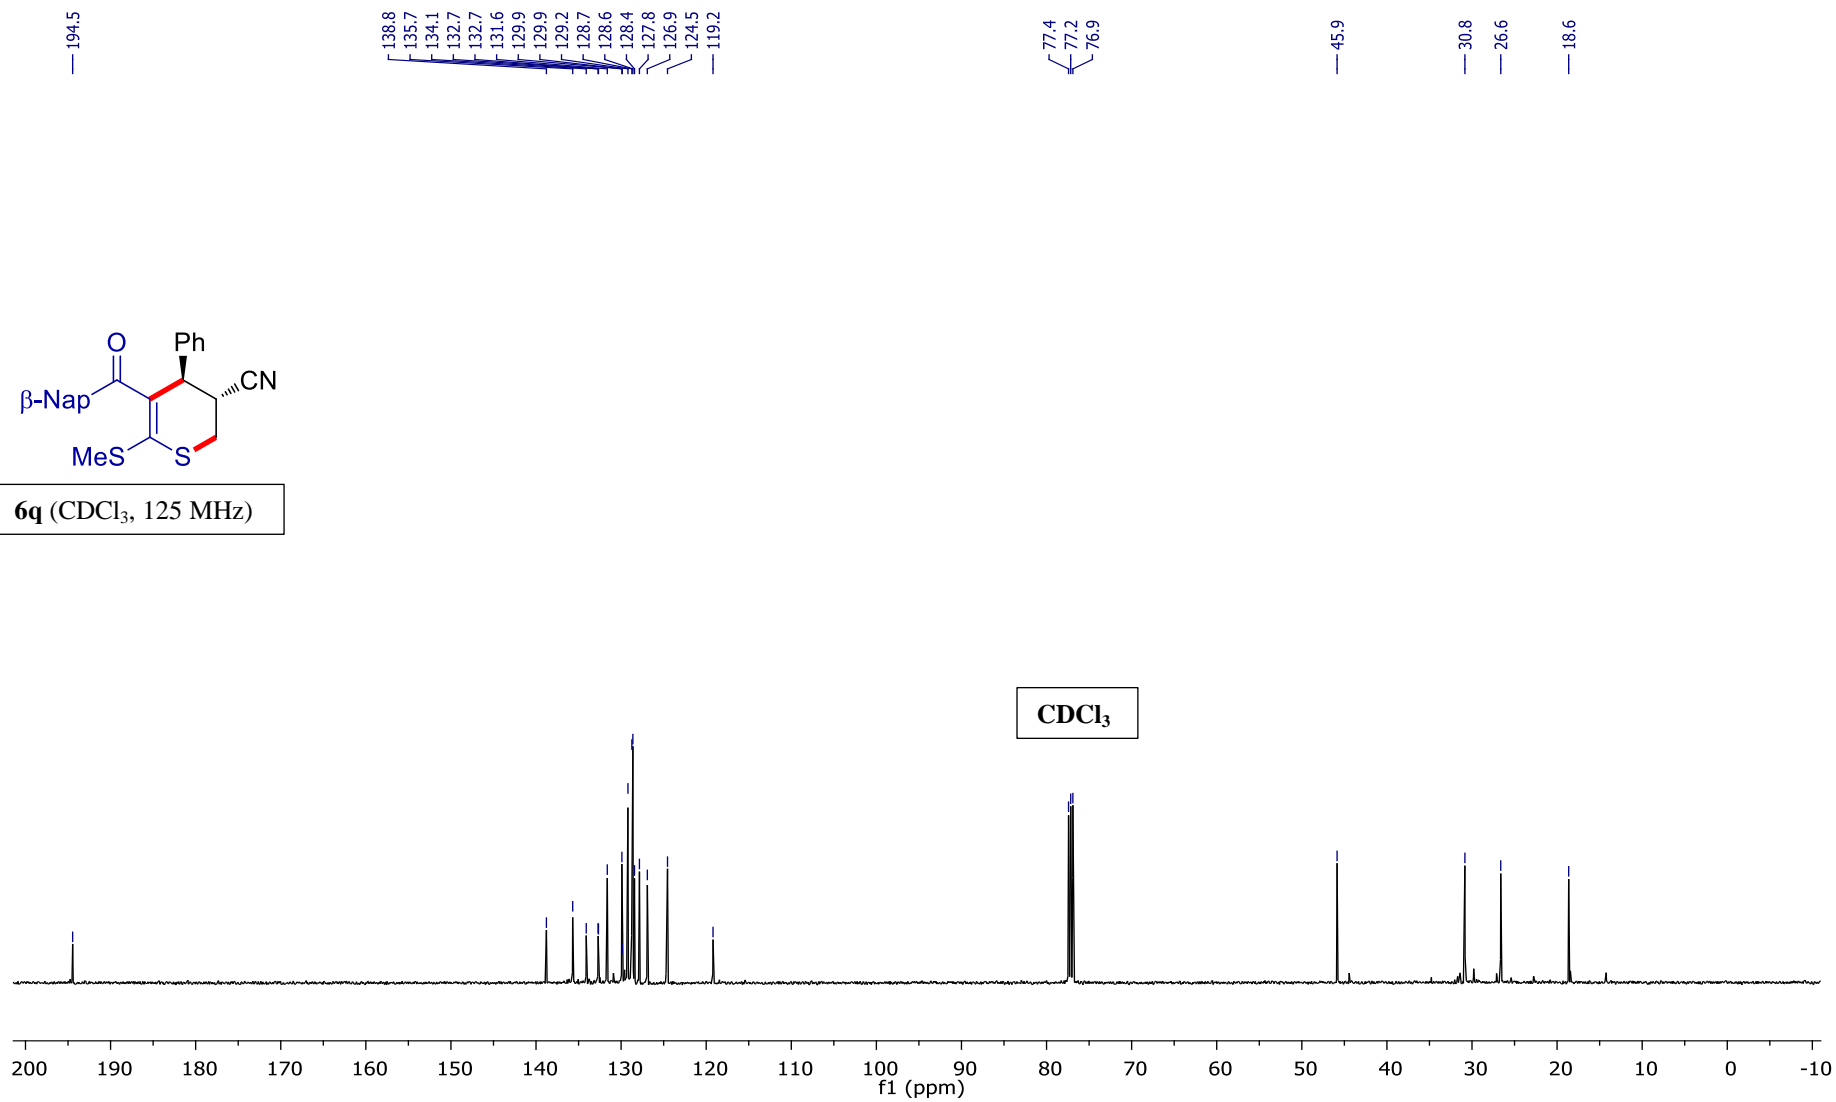

**$^1\text{H}$  (500 MHz,  $\text{CDCl}_3$ ) and  $^{13}\text{C}$ ( $^1\text{H}$ ) (125 MHz,  $\text{CDCl}_3$ ) NMR of Compound 6r**

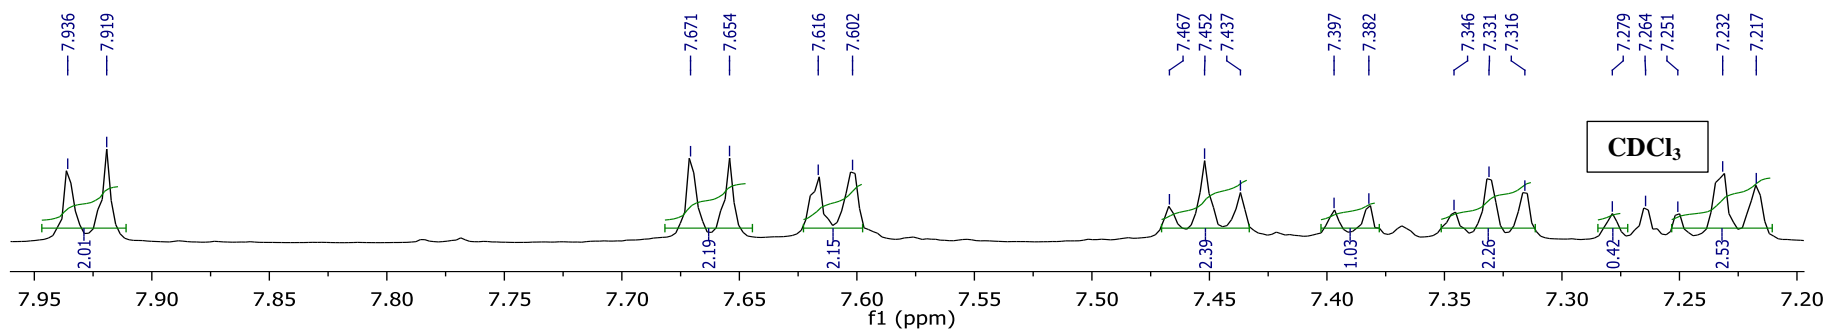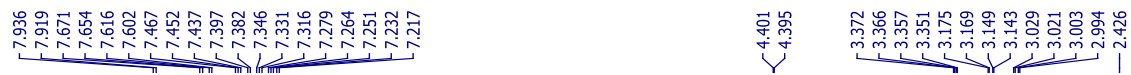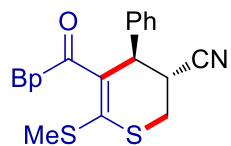

**6r** ( $\text{CDCl}_3$ , 500 MHz)

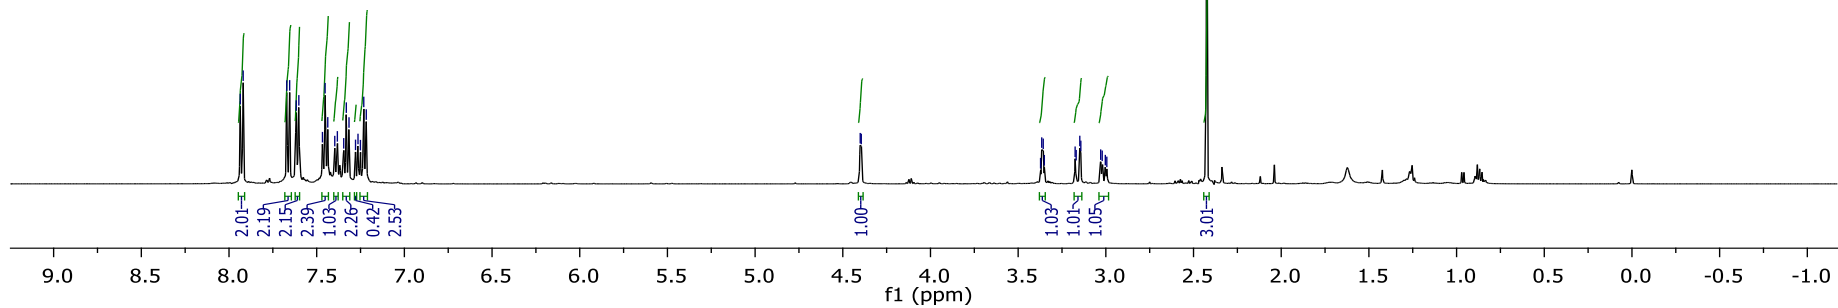

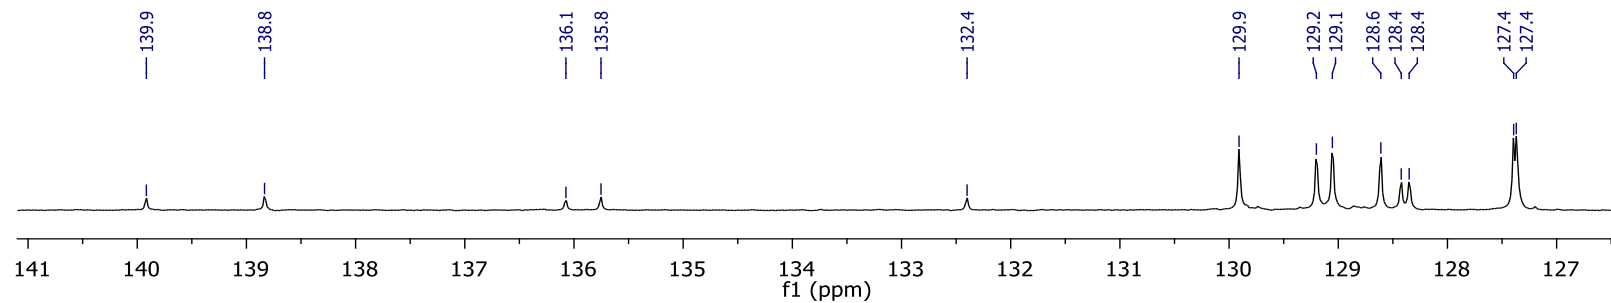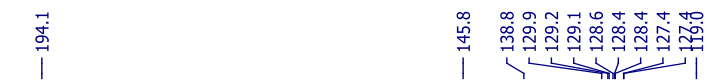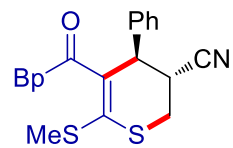

**6r** (CDCl<sub>3</sub>, 125 MHz)

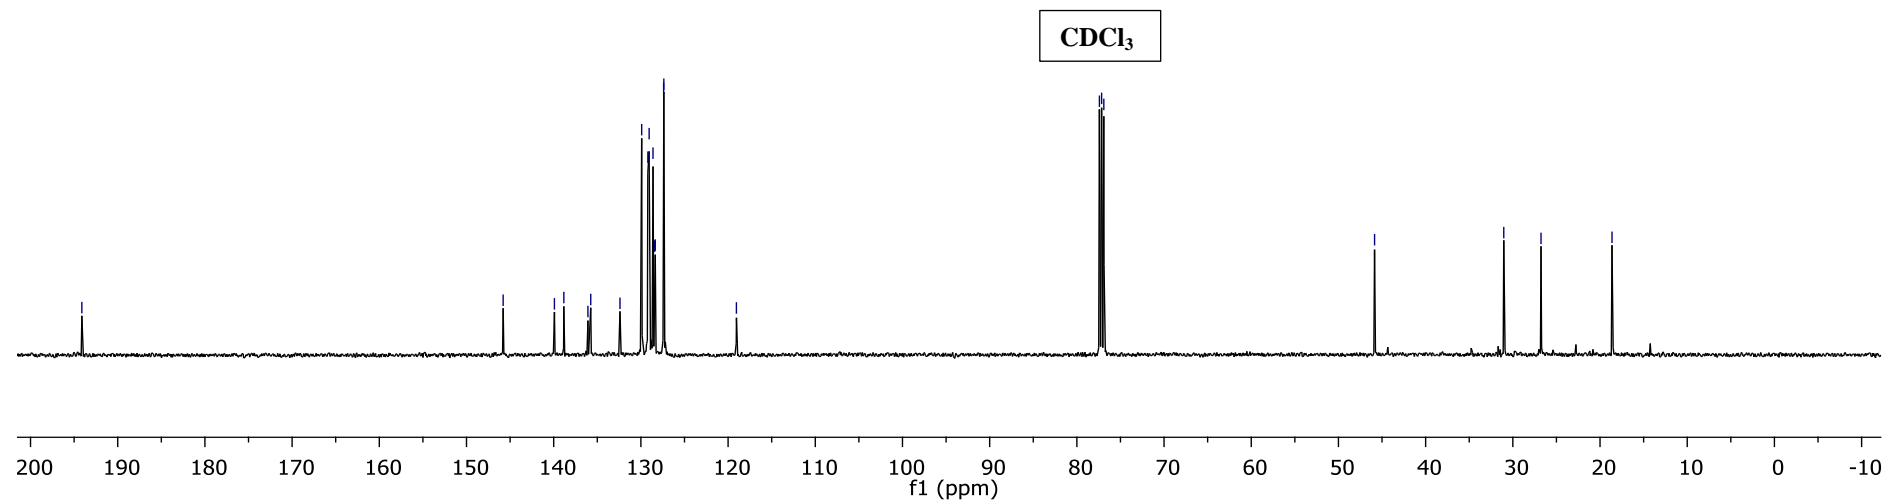

**$^1\text{H}$  (500 MHz,  $\text{CDCl}_3$ ) and  $^{13}\text{C}$ ( $^1\text{H}$ ) (125 MHz,  $\text{CDCl}_3$ ) NMR of Compound **6s****

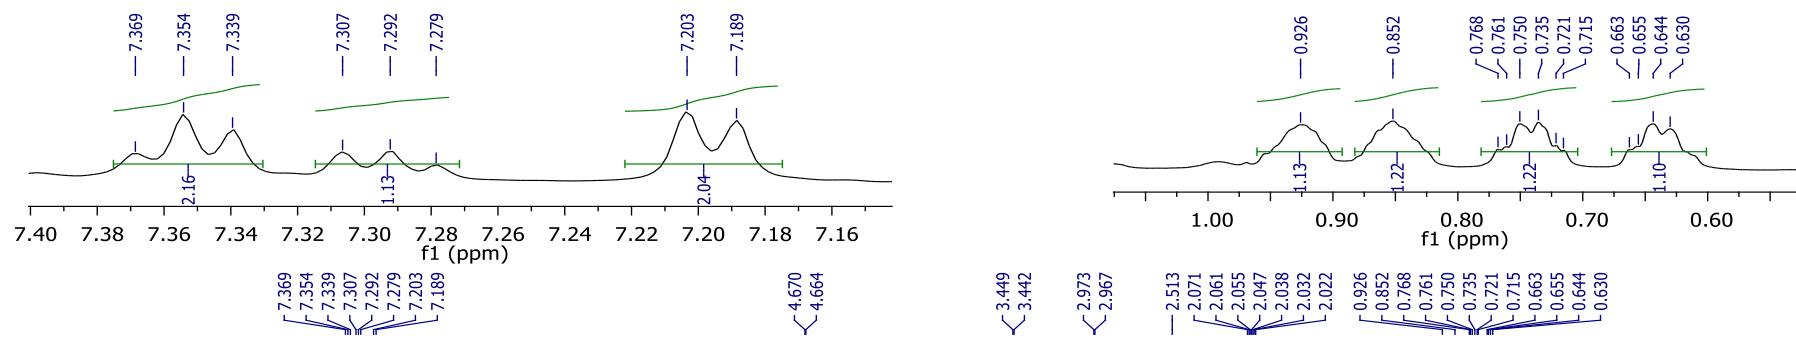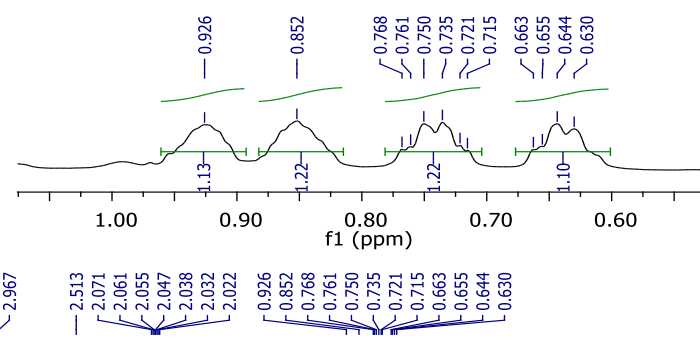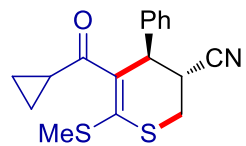

**6s** ( $\text{CDCl}_3$ , 500 MHz)

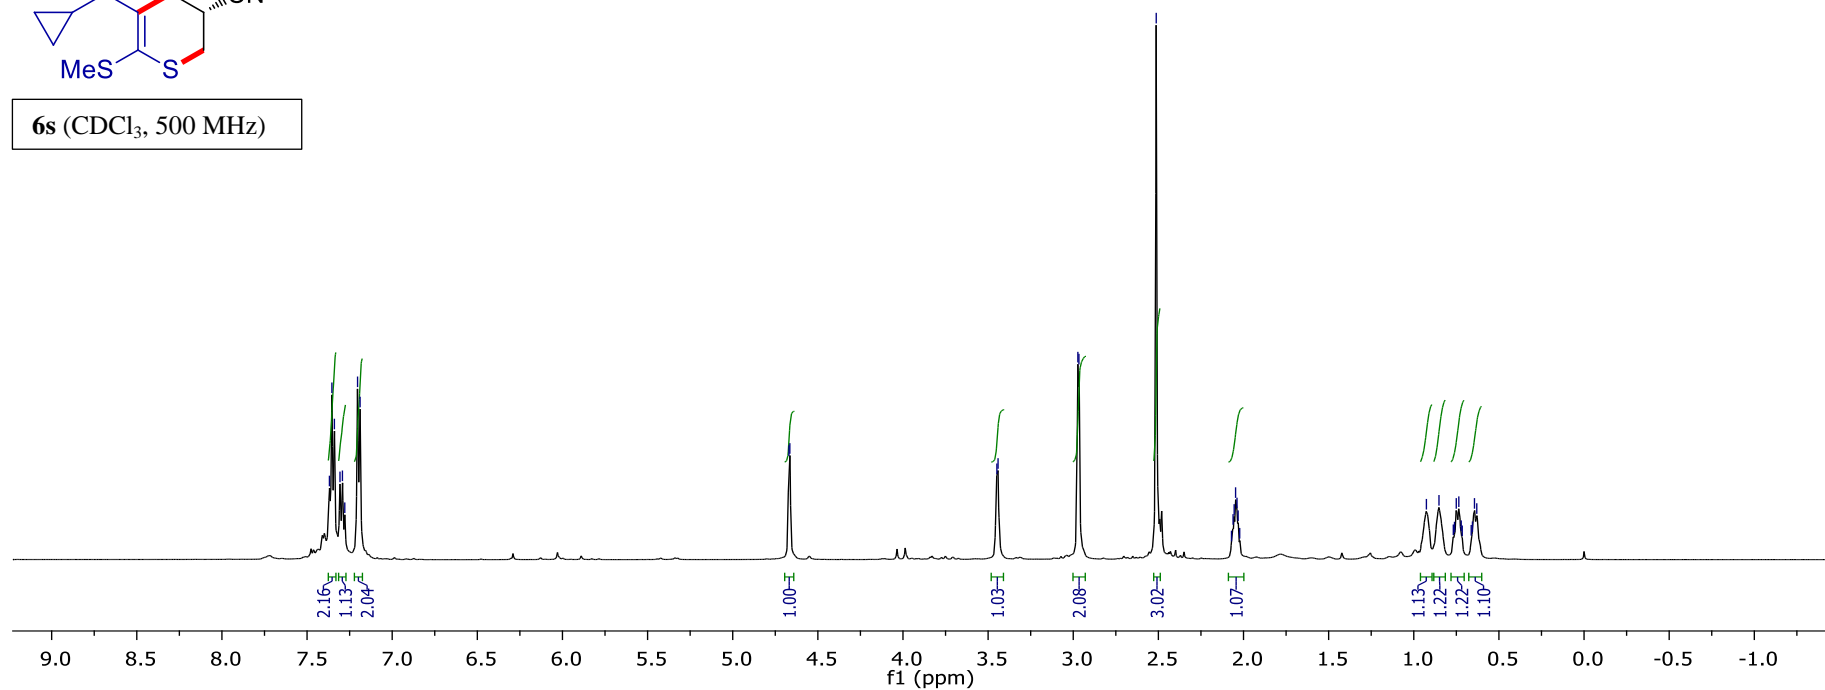

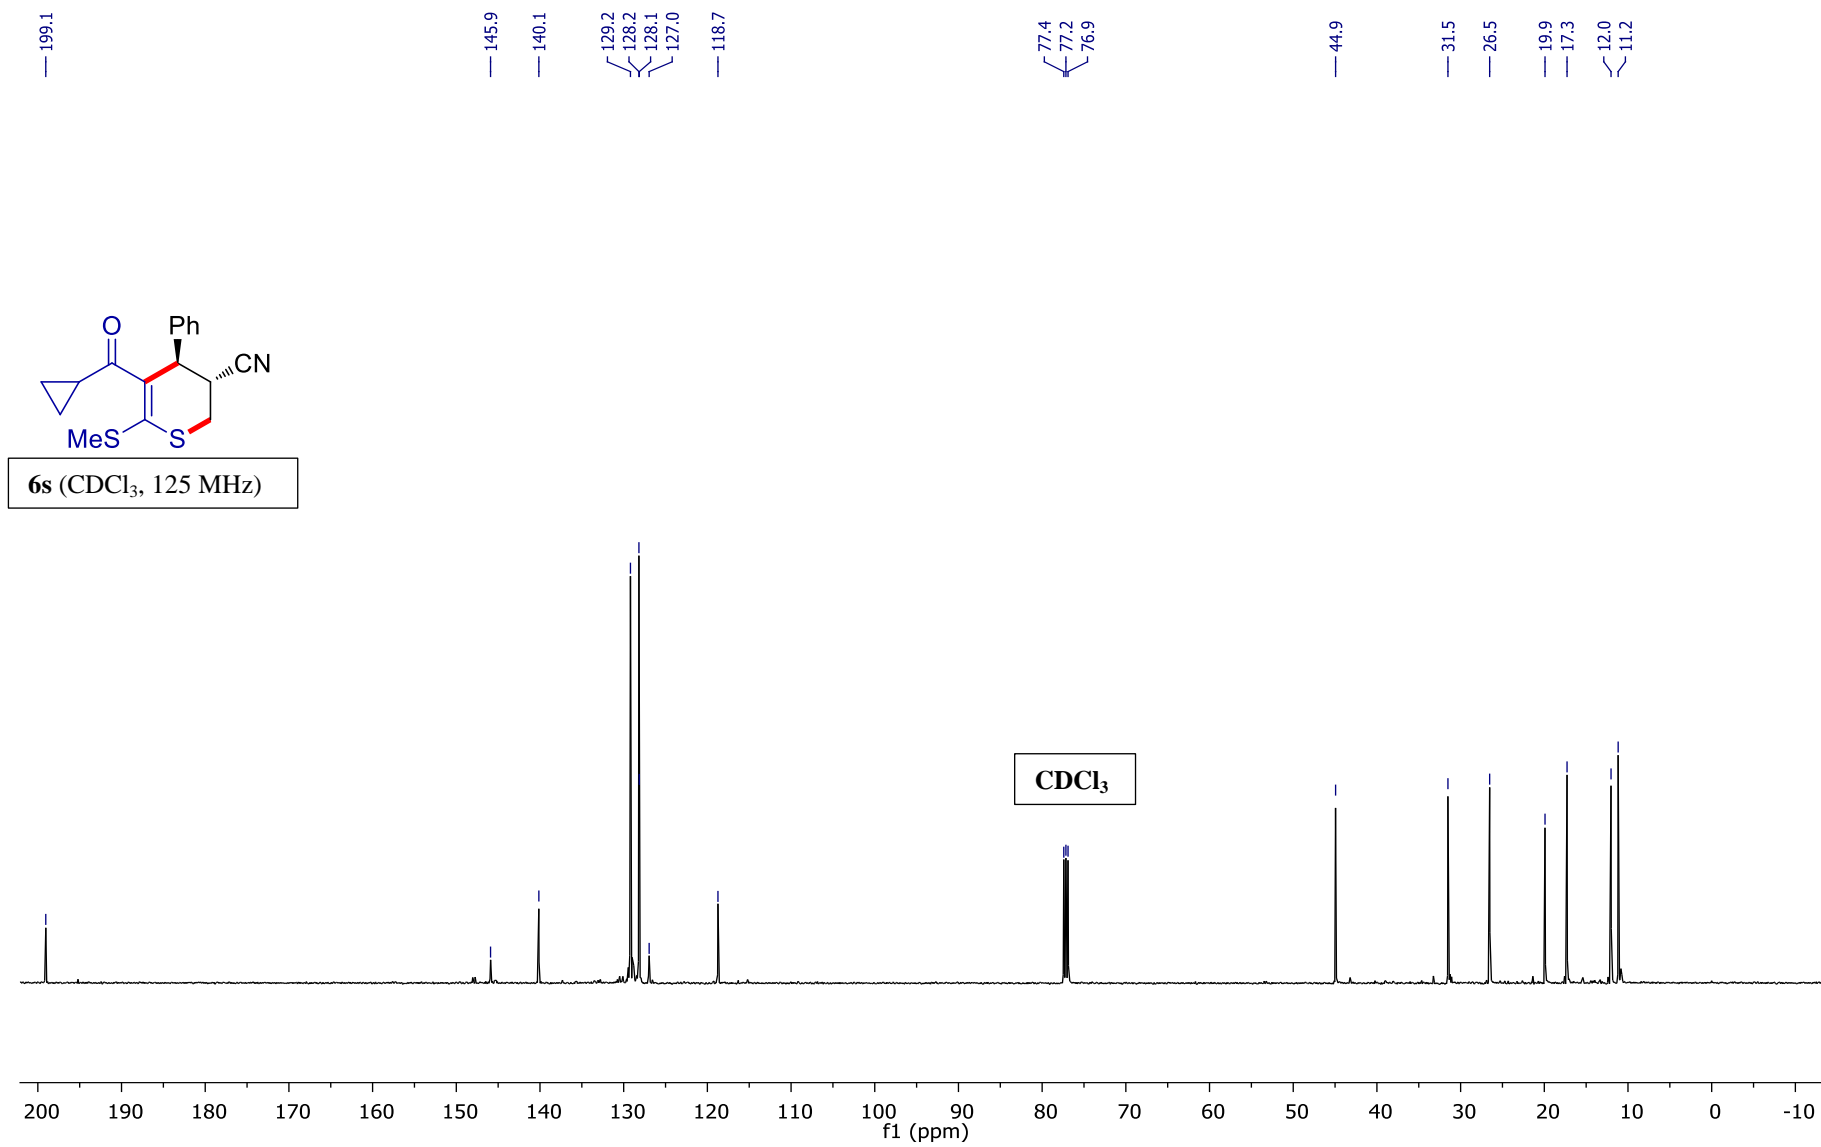

### $^1\text{H}$ (500 MHz, $\text{CDCl}_3$ ) and $^{13}\text{C}$ ( $^1\text{H}$ ) (125 MHz, $\text{CDCl}_3$ ) NMR of Compound **6t**

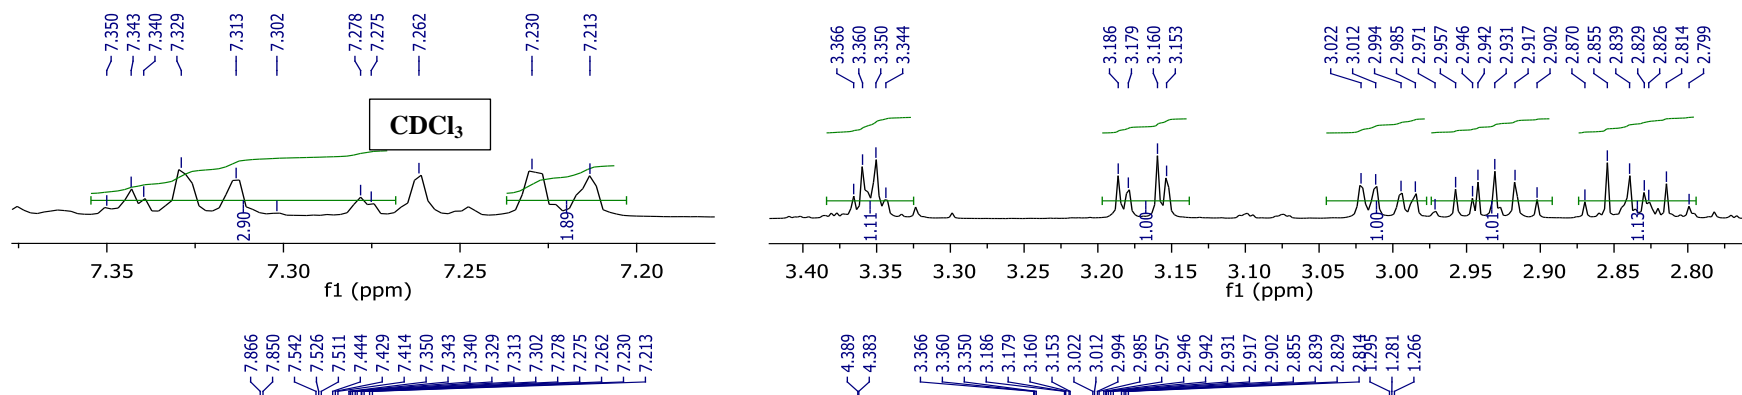

The trace amount of impurity is the inseparable diastereomer

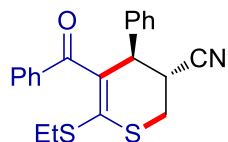

**6t** ( $\text{CDCl}_3$ , 500 MHz)

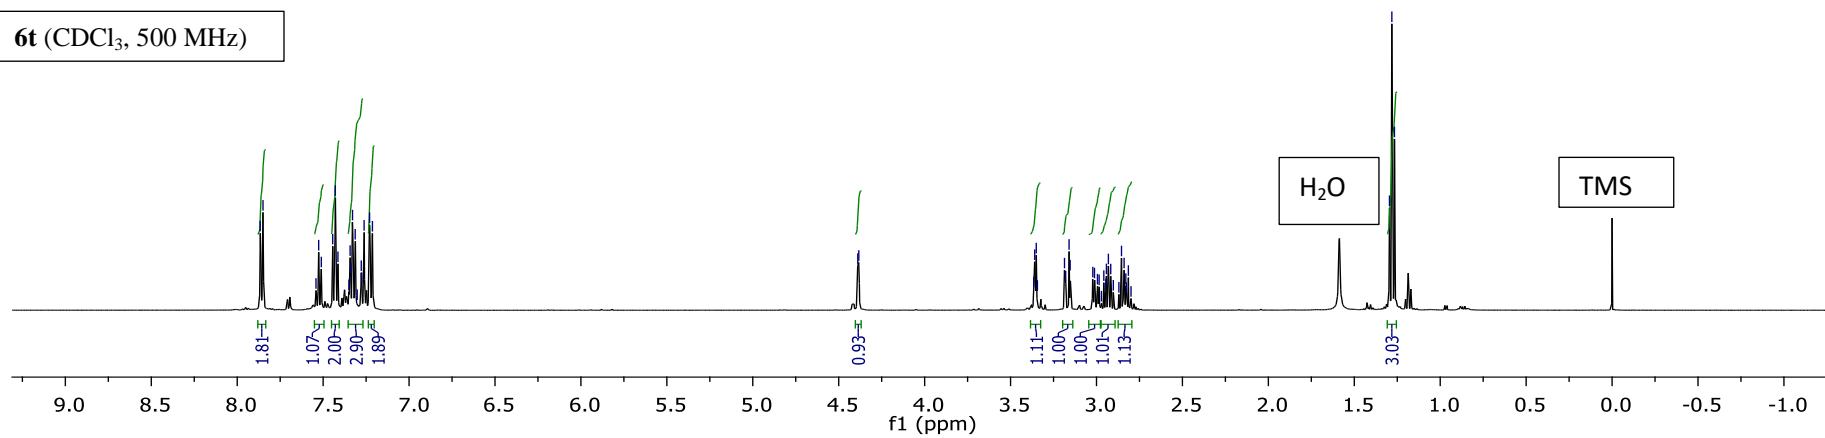

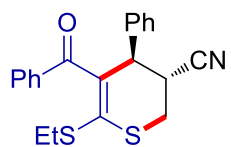

6t (CDCl<sub>3</sub>, 125 MHz)

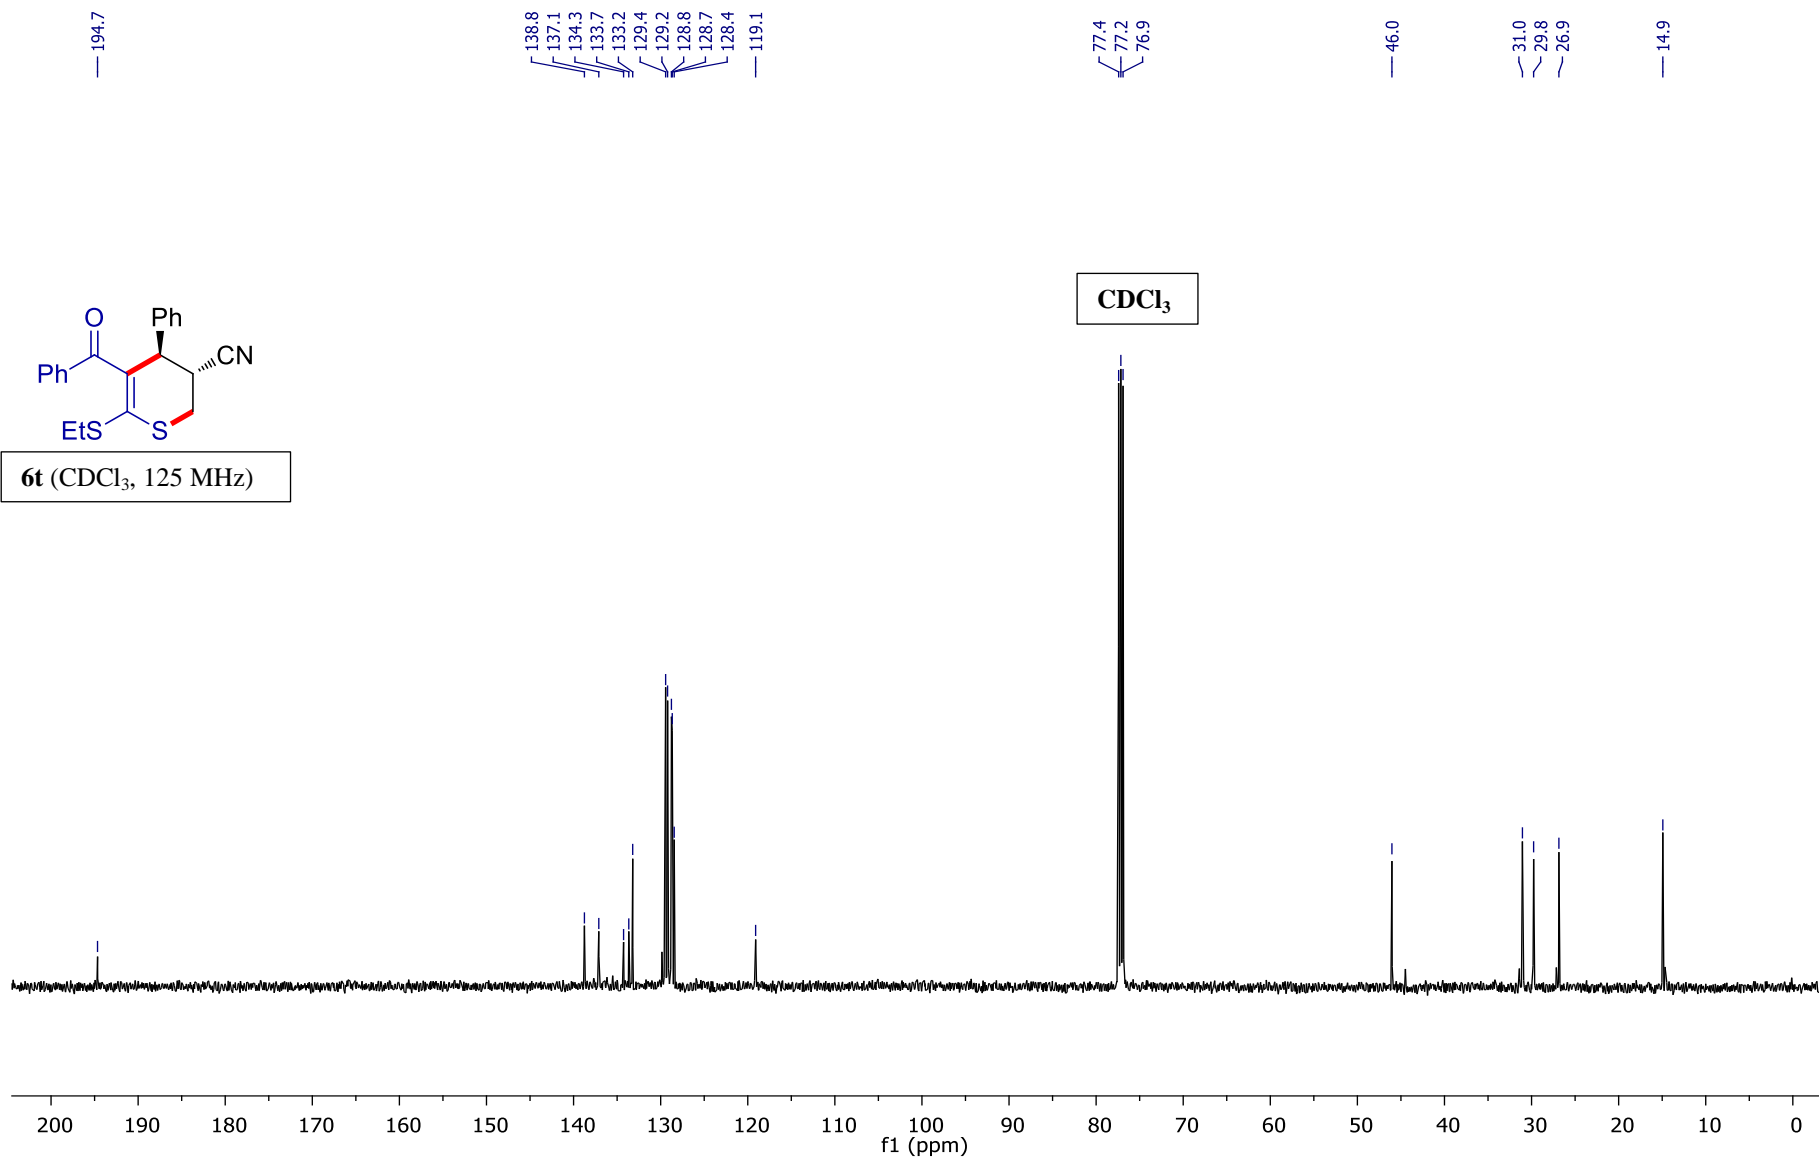

**$^1\text{H}$  (500 MHz,  $\text{CDCl}_3$ ) and  $^{13}\text{C}$ ( $^1\text{H}$ ) (125 MHz,  $\text{CDCl}_3$ ) NMR of Compound **6u****

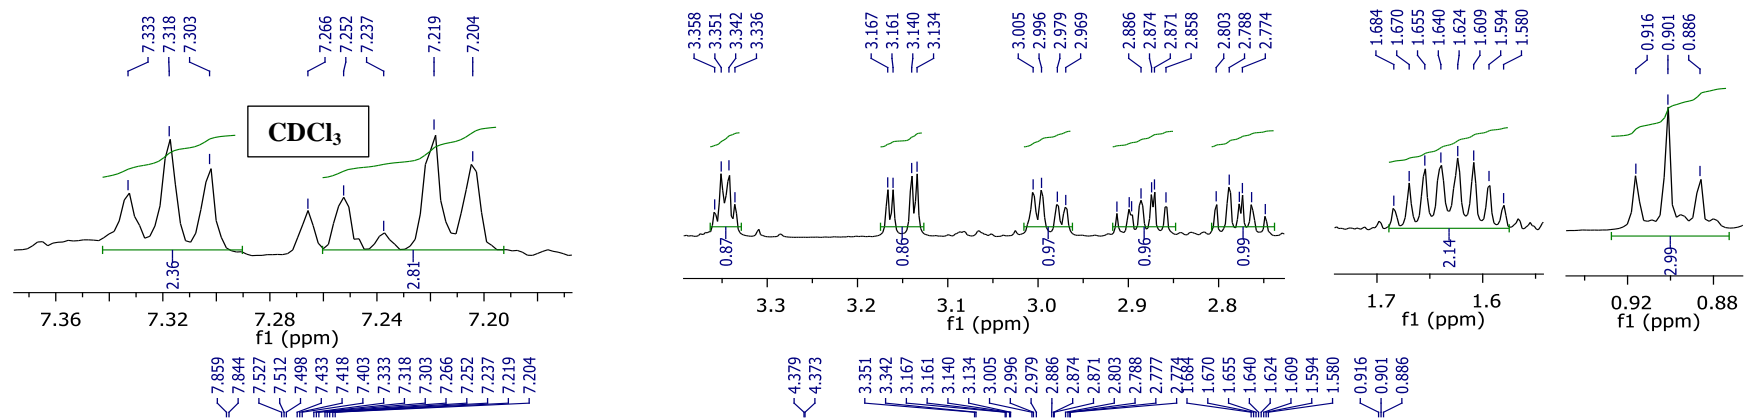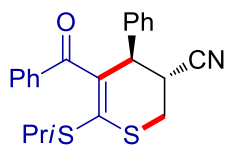

**6u** ( $\text{CDCl}_3$ , 500 MHz)

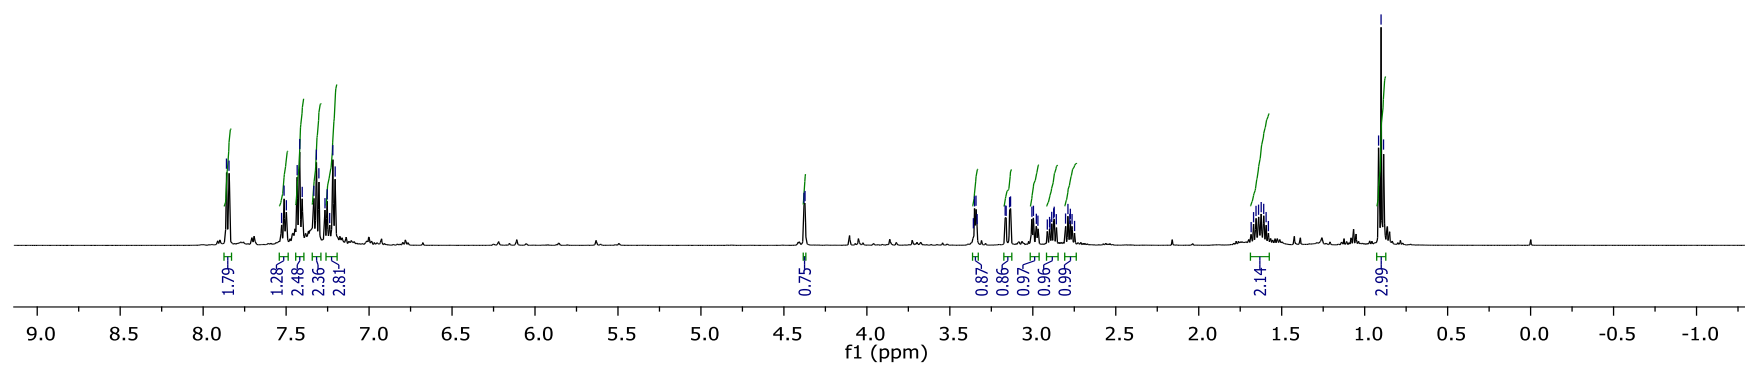



— 194.6

138.8  
137.2  
134.6  
133.5  
133.1  
129.4  
129.1  
128.7  
128.6  
128.4  
— 119.1

77.4  
77.2  
76.9

— 46.0

— 37.5

31.0  
26.9  
23.0

— 13.2

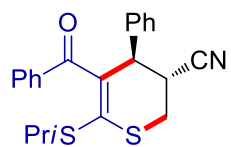

**6u** (CDCl<sub>3</sub>, 125 MHz)

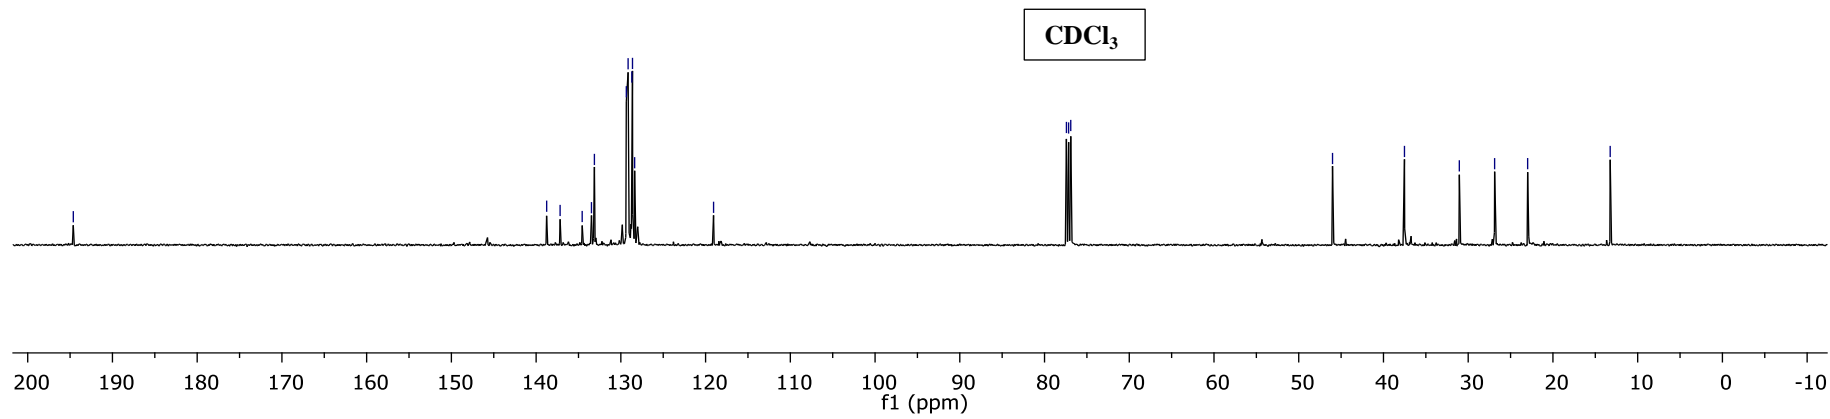

**$^1\text{H}$  (500 MHz,  $\text{CDCl}_3$ ) and  $^{13}\text{C}$ ( $^1\text{H}$ ) (125 MHz,  $\text{CDCl}_3$ ) NMR of Compound **6v****

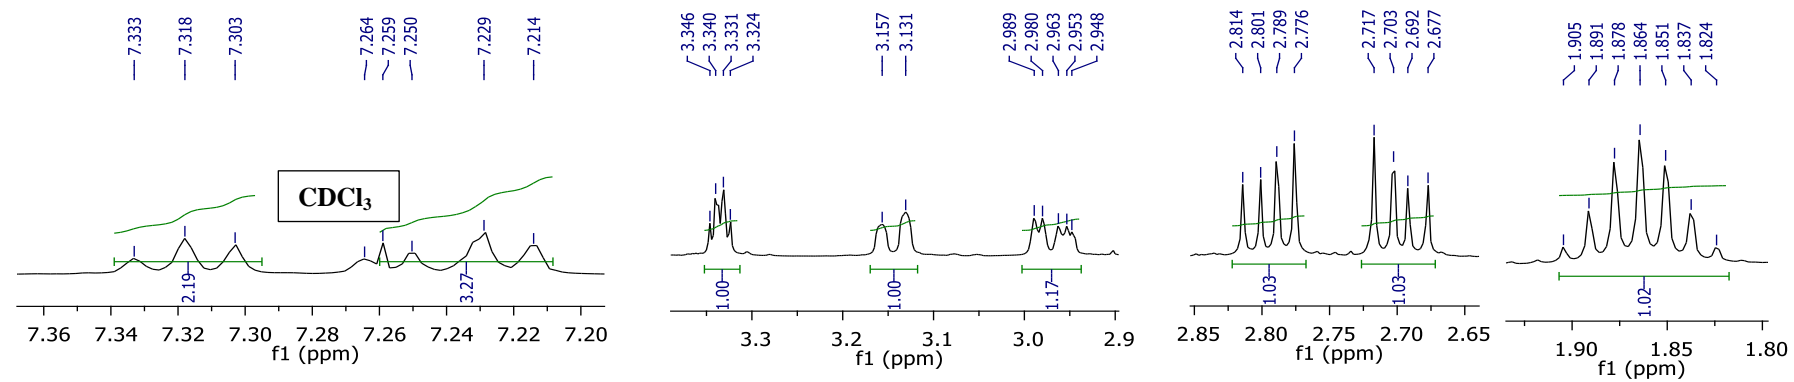

$\text{CDCl}_3$

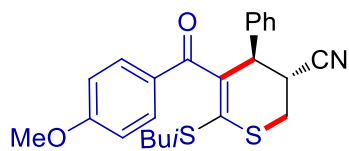

**6v** ( $\text{CDCl}_3$ , 500 MHz)

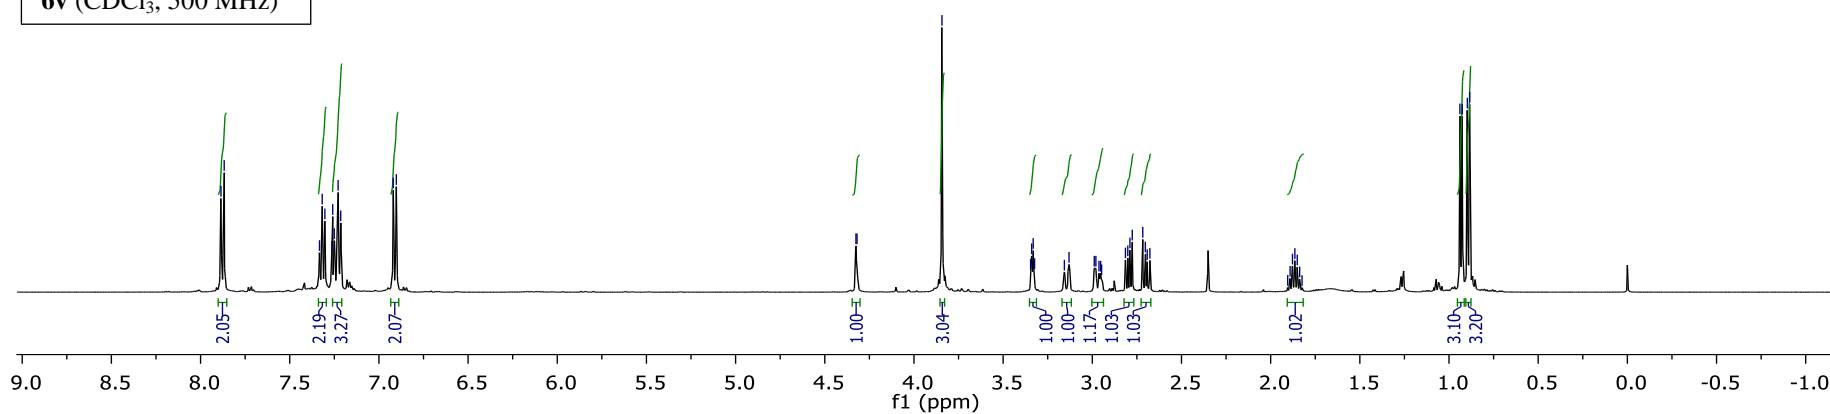

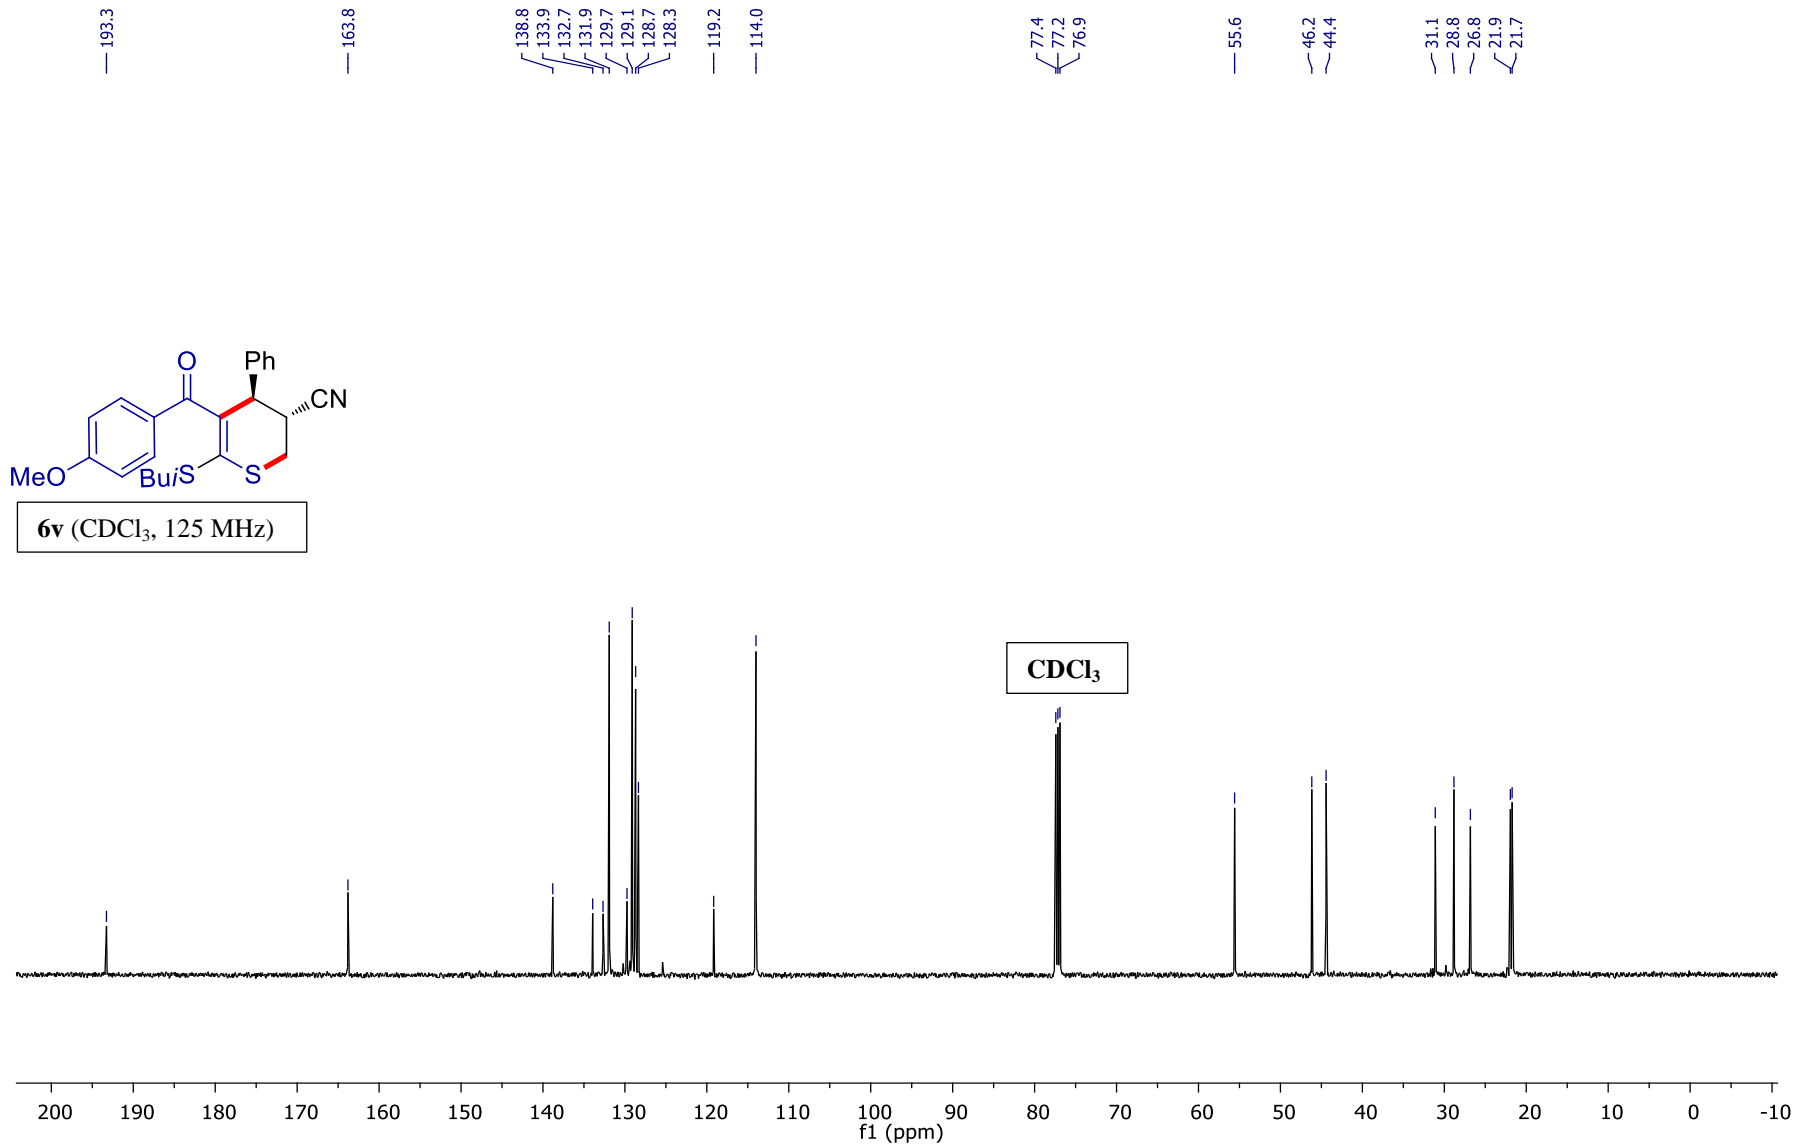

**$^1\text{H}$  (500 MHz,  $\text{CDCl}_3$ ) and  $^{13}\text{C}$  ( $^1\text{H}$ ) (125 MHz,  $\text{CDCl}_3$ ) NMR of Compound **6w****

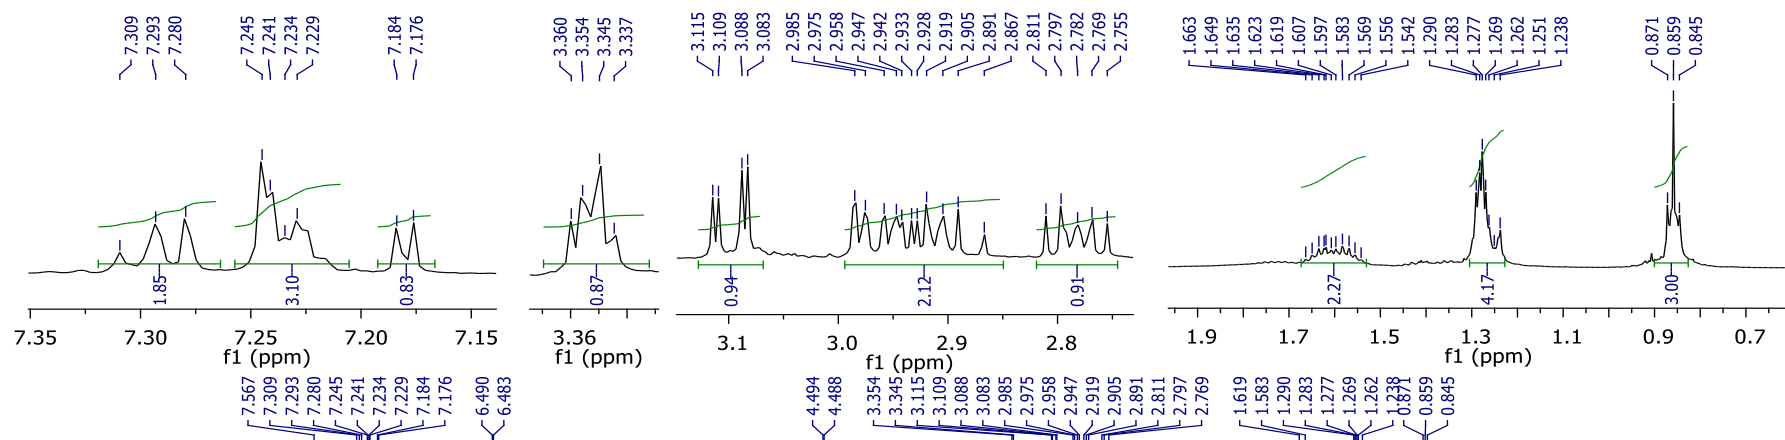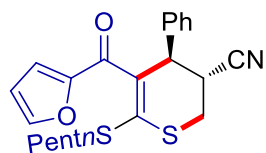

**6w** ( $\text{CDCl}_3$ , 500 MHz)

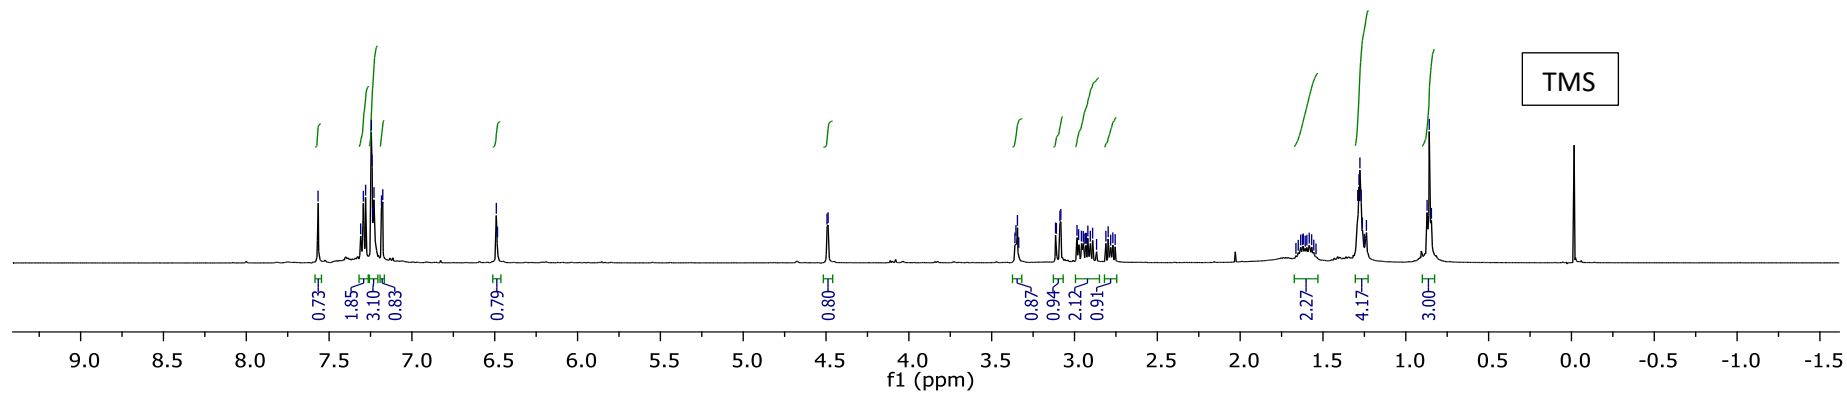

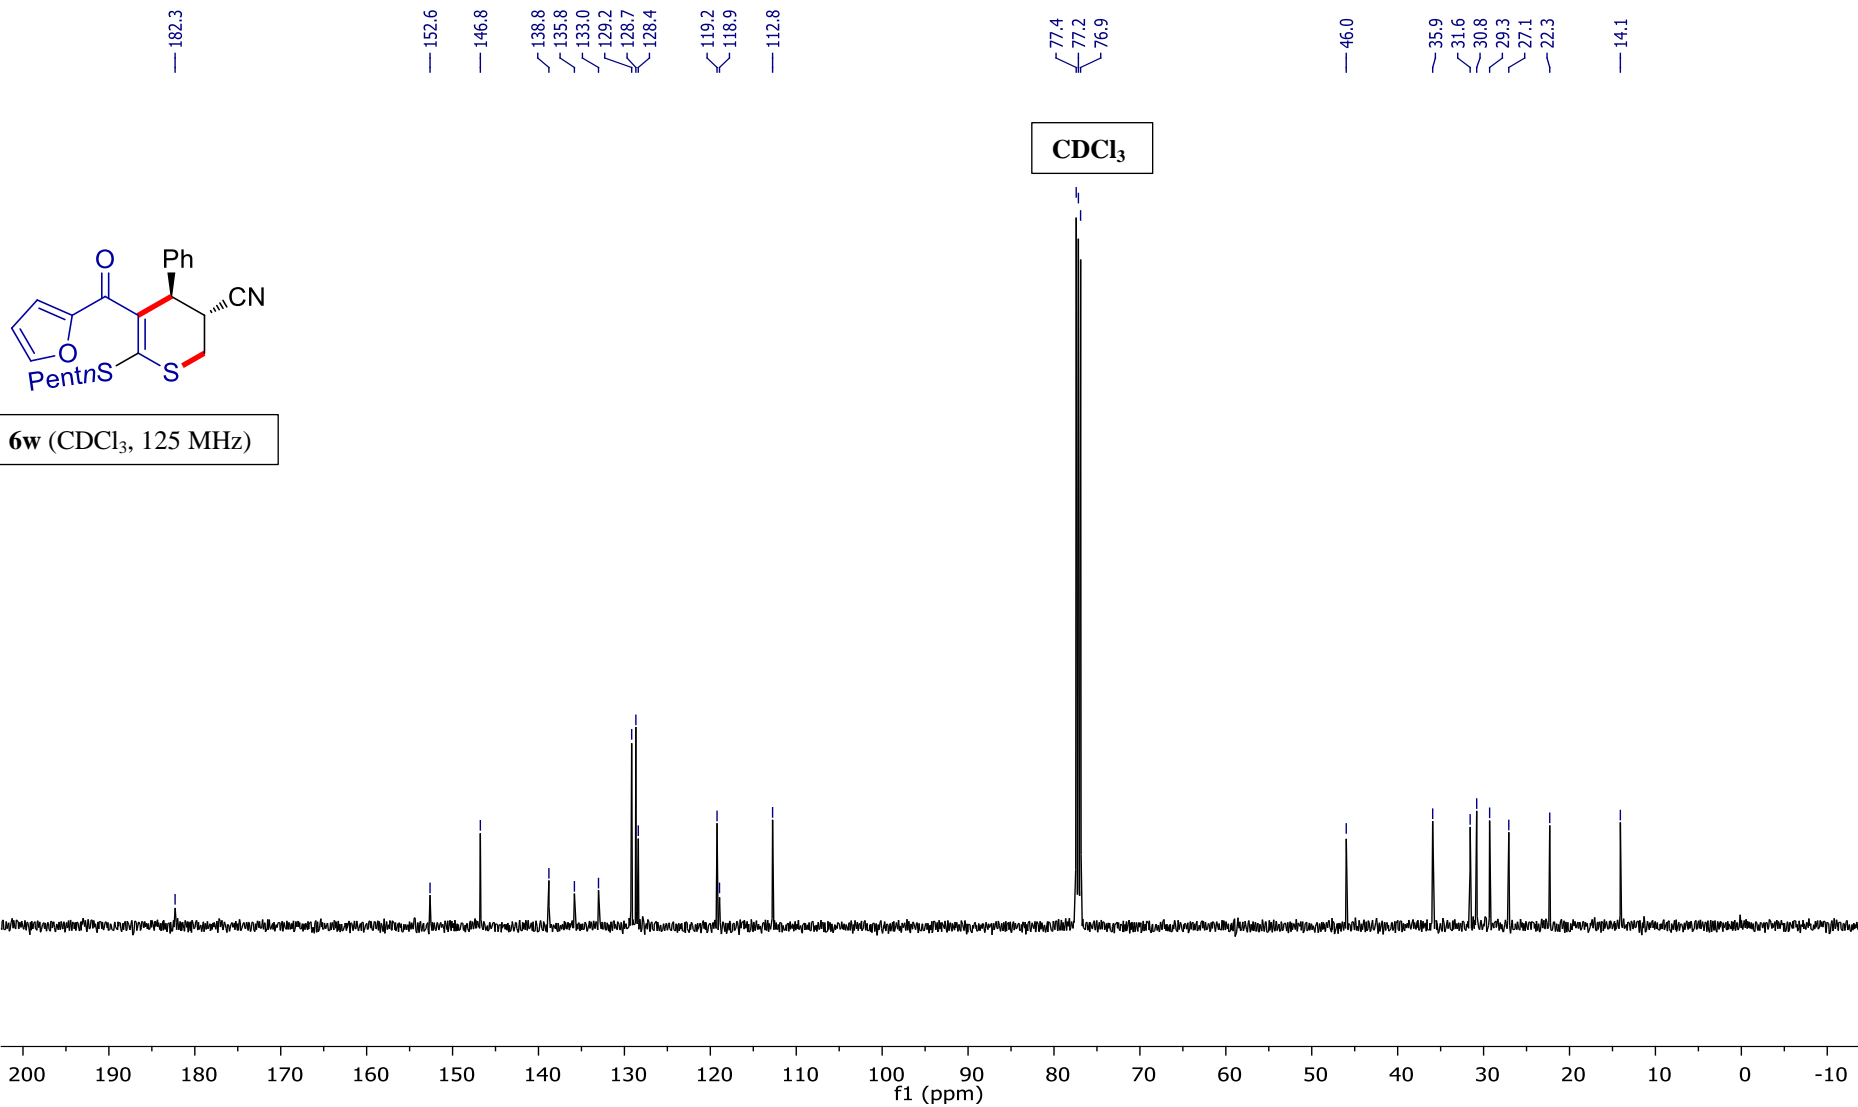

**$^1\text{H}$  (500 MHz,  $\text{CDCl}_3$ ) and  $^{13}\text{C}$ ( $^1\text{H}$ ) (125 MHz,  $\text{CDCl}_3$ ) NMR of Compound 6x**

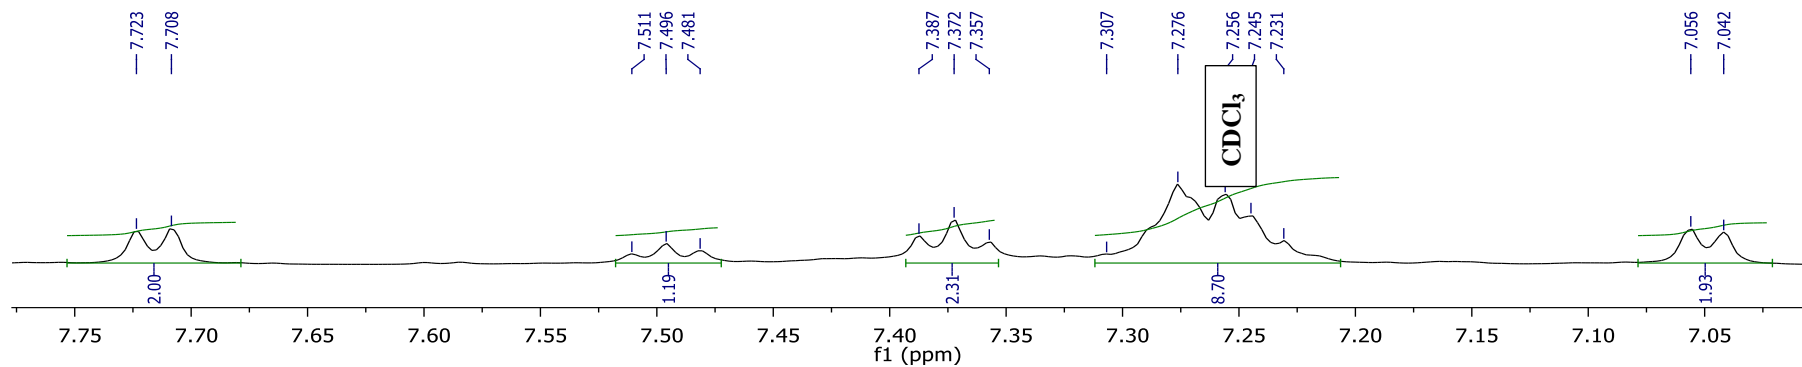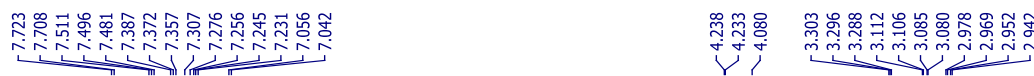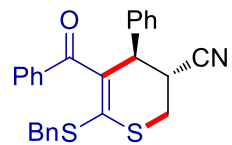

**6x** ( $\text{CDCl}_3$ , 500 MHz)

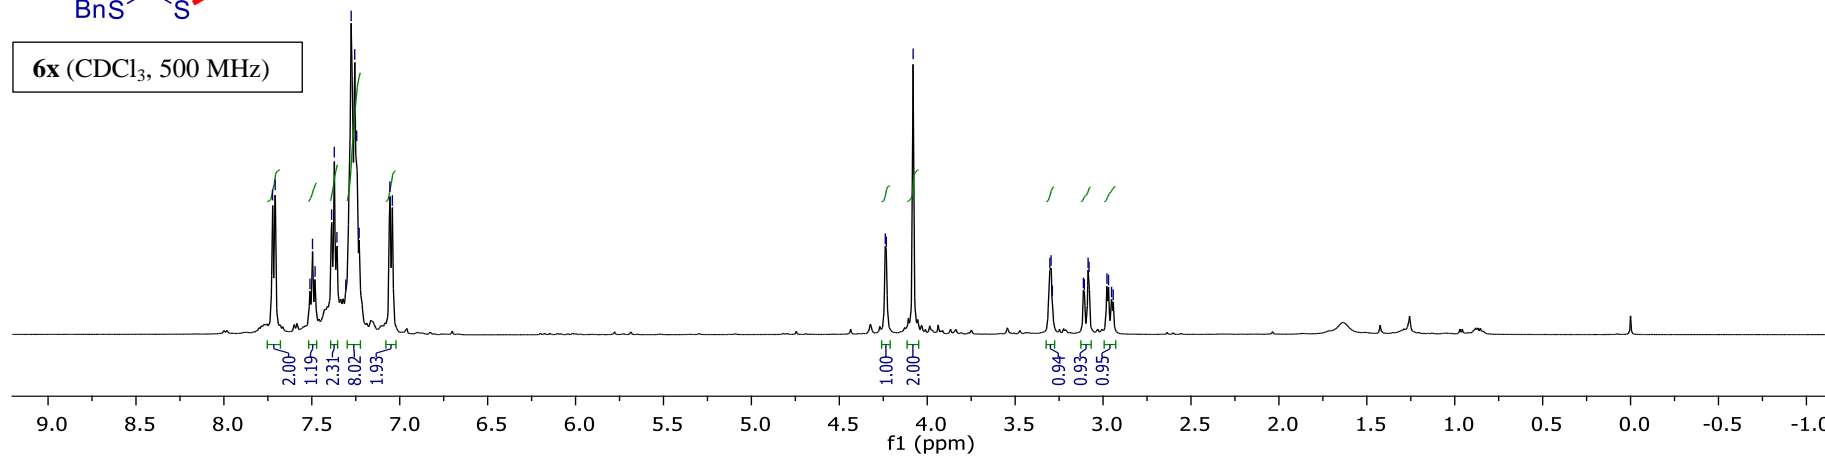

194.2

138.5  
137.0  
136.6  
134.5  
133.1  
129.4  
129.2  
129.1  
128.8  
128.7  
128.6  
128.3  
127.6  
119.0

77.4  
77.2  
76.9

46.0

39.8

31.1

26.9

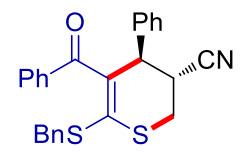

6x (CDCl<sub>3</sub>, 125 MHz)

CDCl<sub>3</sub>

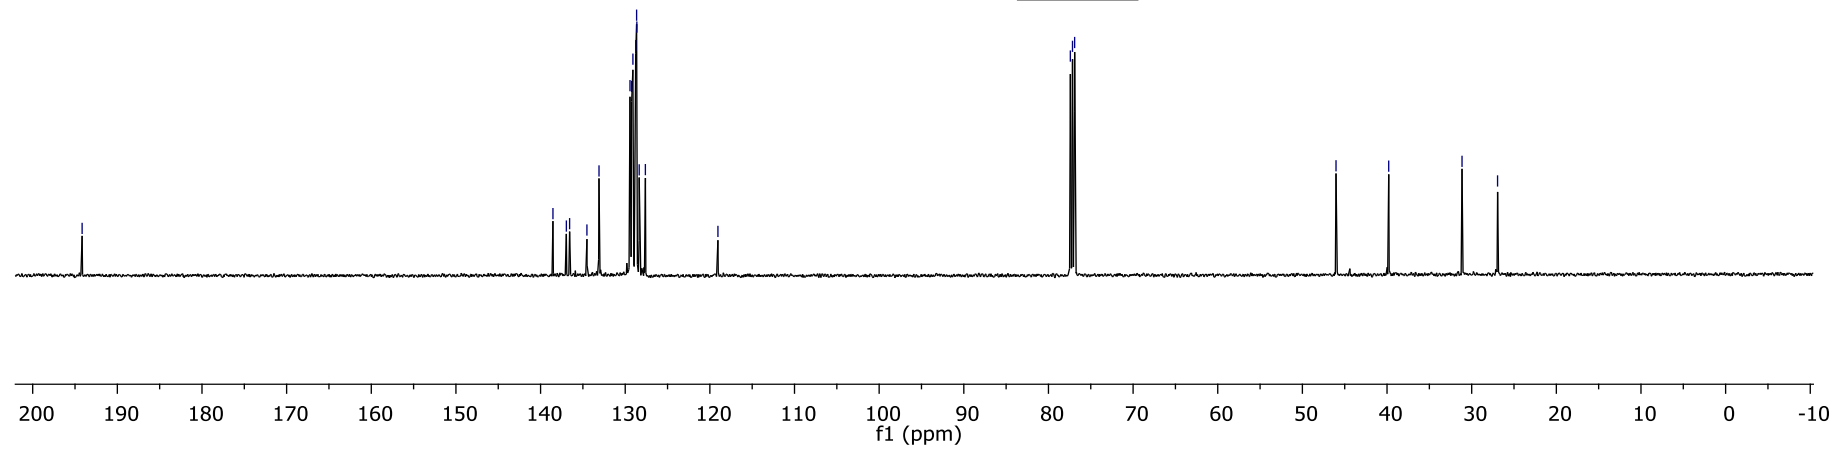

**$^1\text{H}$  (500 MHz,  $\text{CDCl}_3$ ) and  $^{13}\text{C}$ ( $^1\text{H}$ ) (125 MHz,  $\text{CDCl}_3$ ) NMR of Compound **6y****

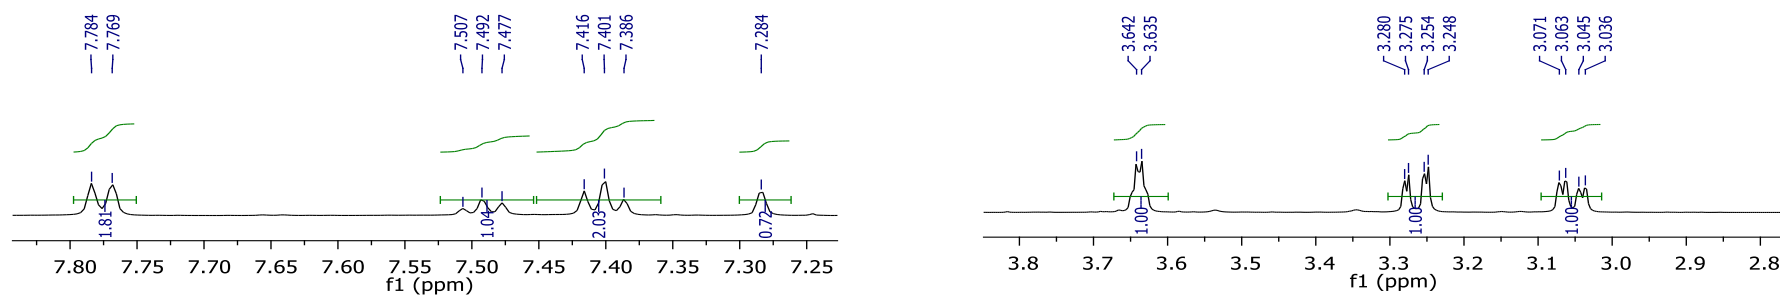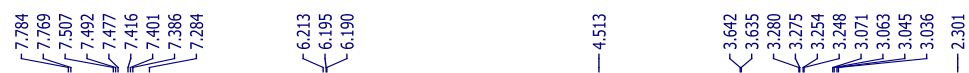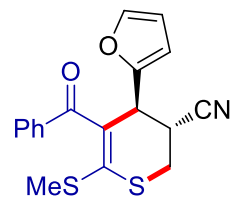

**6y** ( $\text{CDCl}_3$ , 500 MHz)

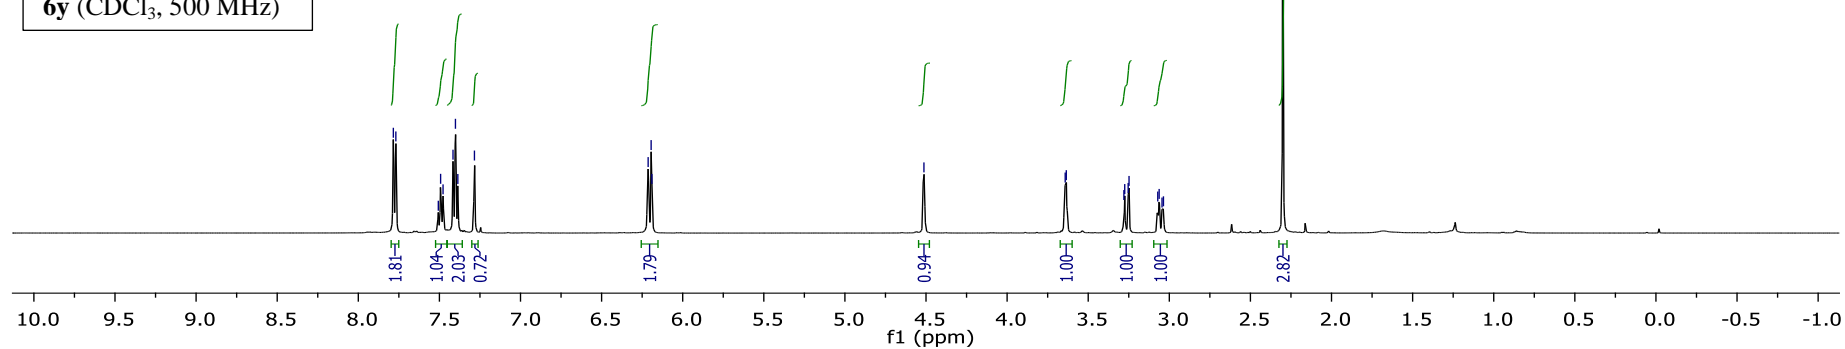



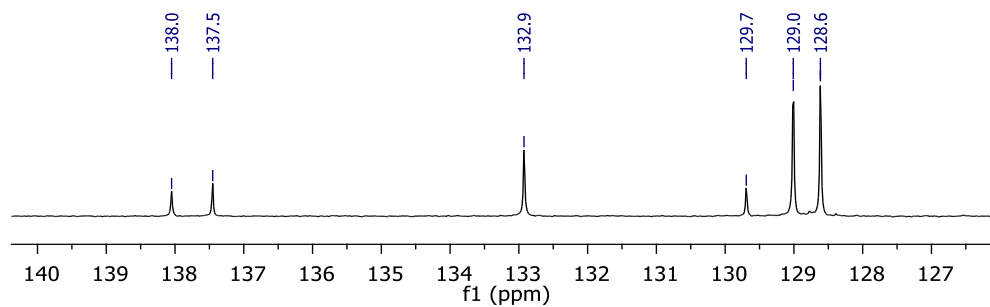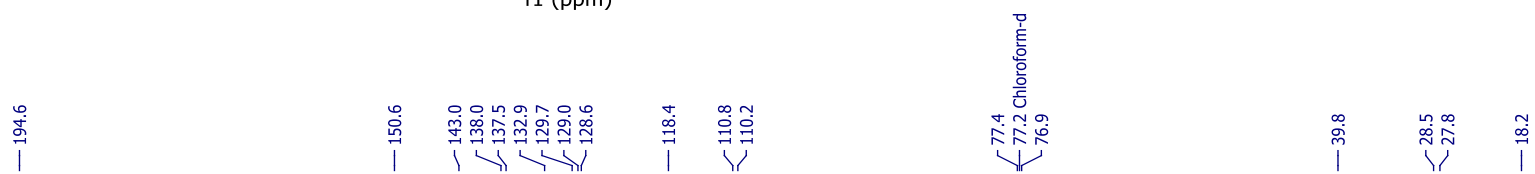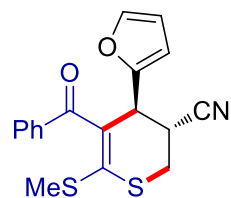

**6y** (CDCl<sub>3</sub>, 125 MHz)

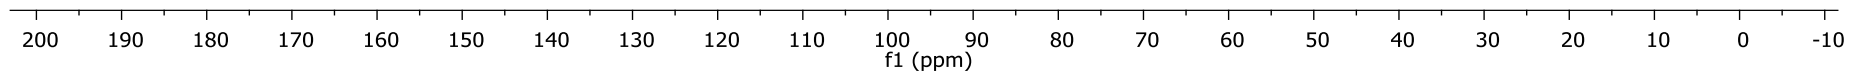

**$^1\text{H}$  (500 MHz,  $\text{CDCl}_3$ ) and  $^{13}\text{C}$ ( $^1\text{H}$ ) (125 MHz,  $\text{CDCl}_3$ ) NMR of Compound **6z****

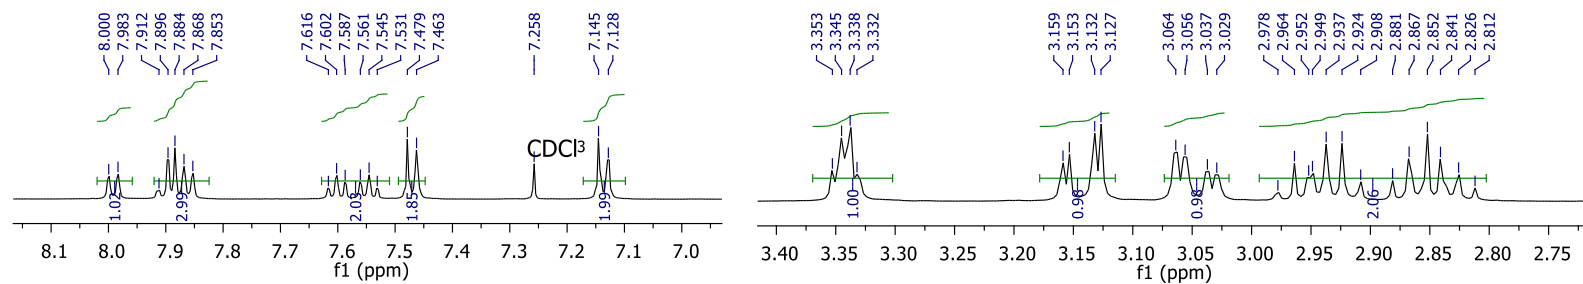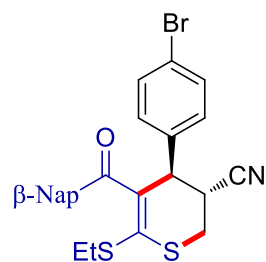

**6z** ( $\text{CDCl}_3$ , 500 MHz)

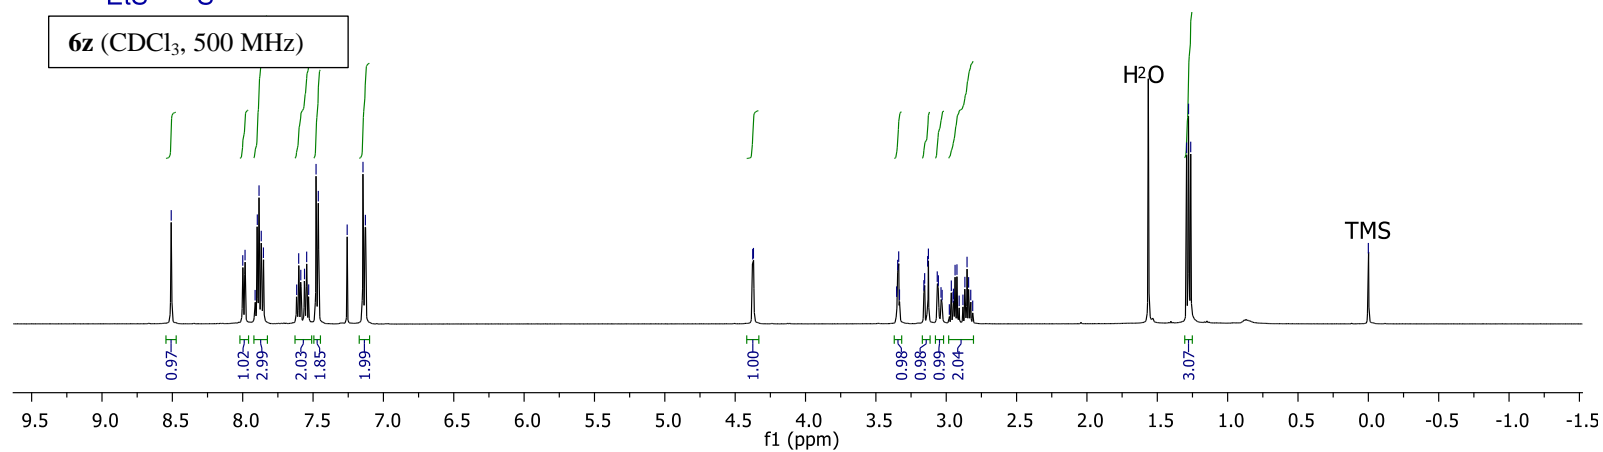

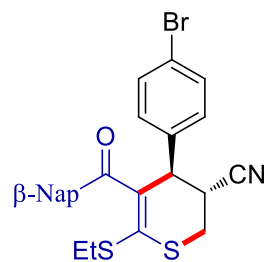

**6z** (CDCl<sub>3</sub>, 125 MHz)

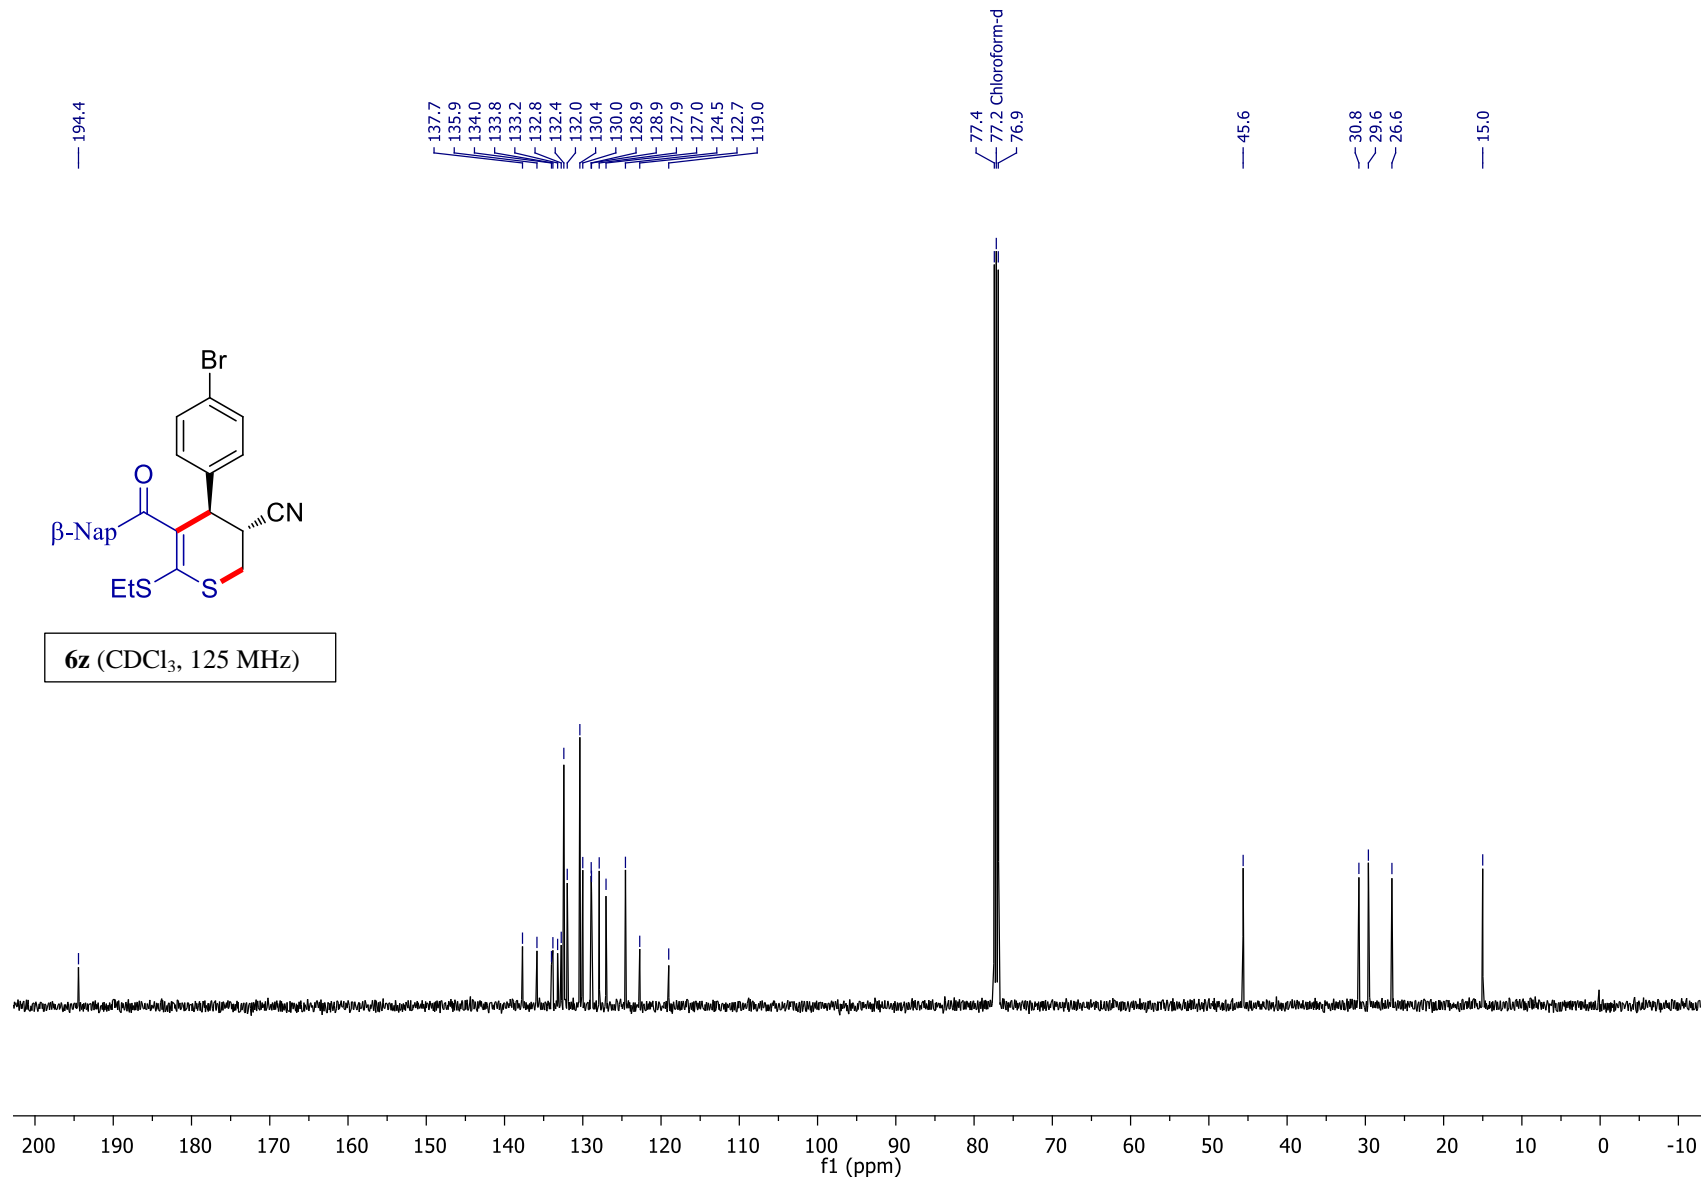

**$^1\text{H}$  (500 MHz,  $\text{CDCl}_3$ ) and  $^{13}\text{C}$ ( $^1\text{H}$ ) (125 MHz,  $\text{CDCl}_3$ ) NMR of Compound 6aa**

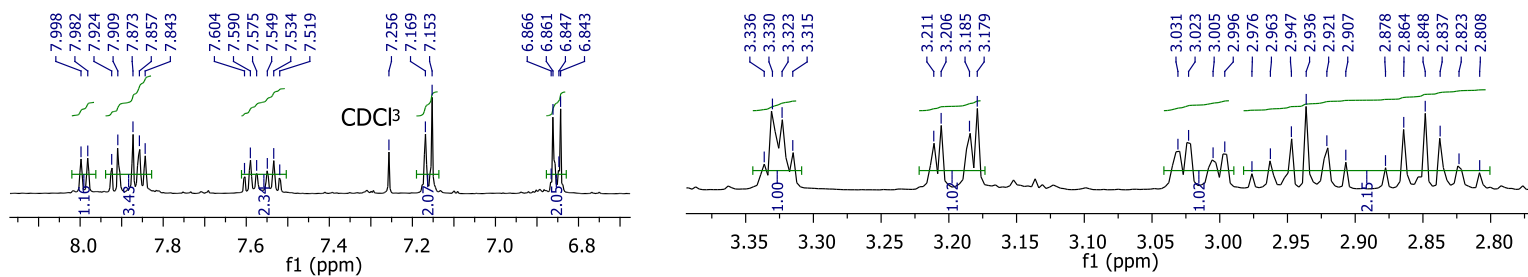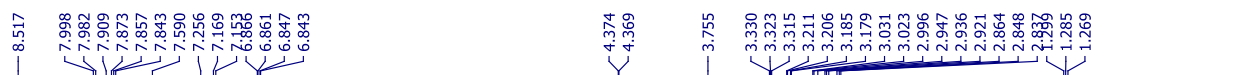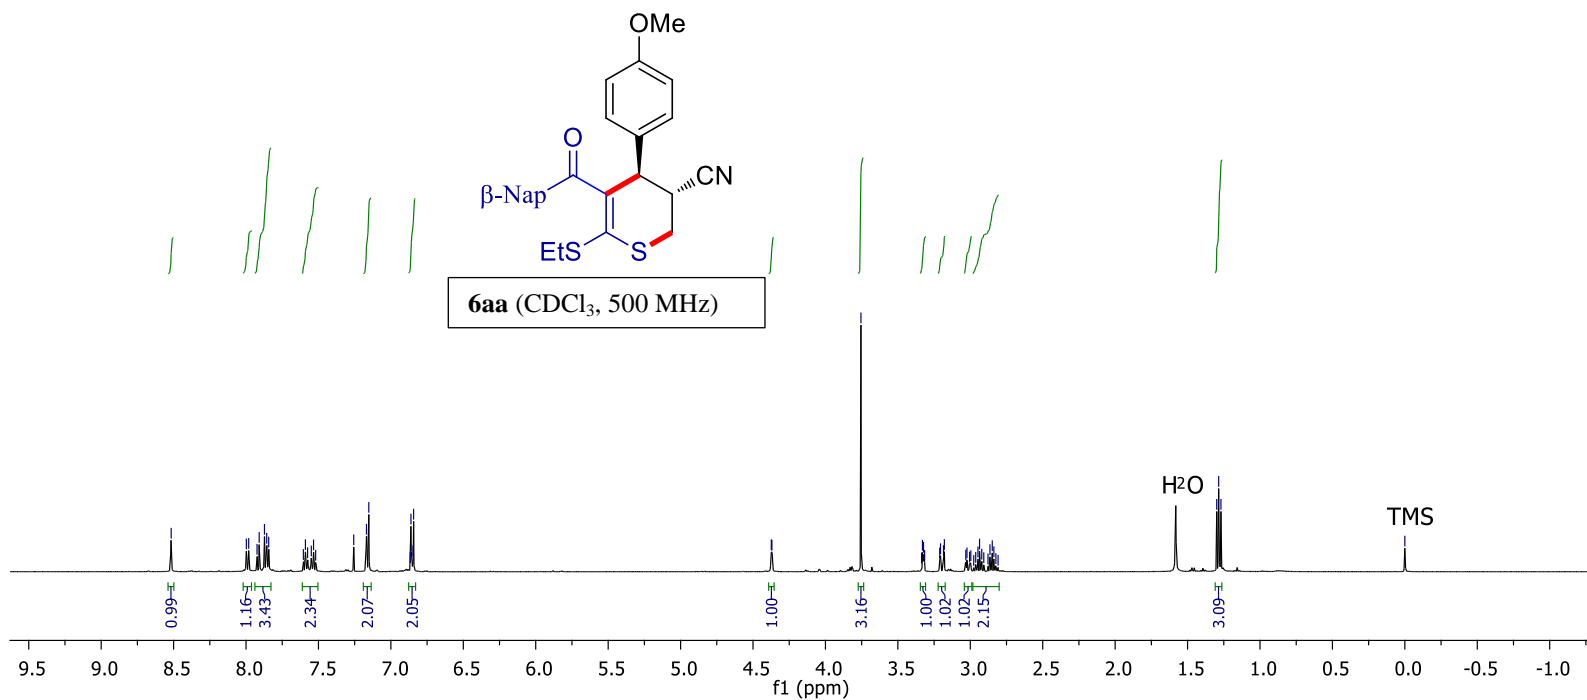

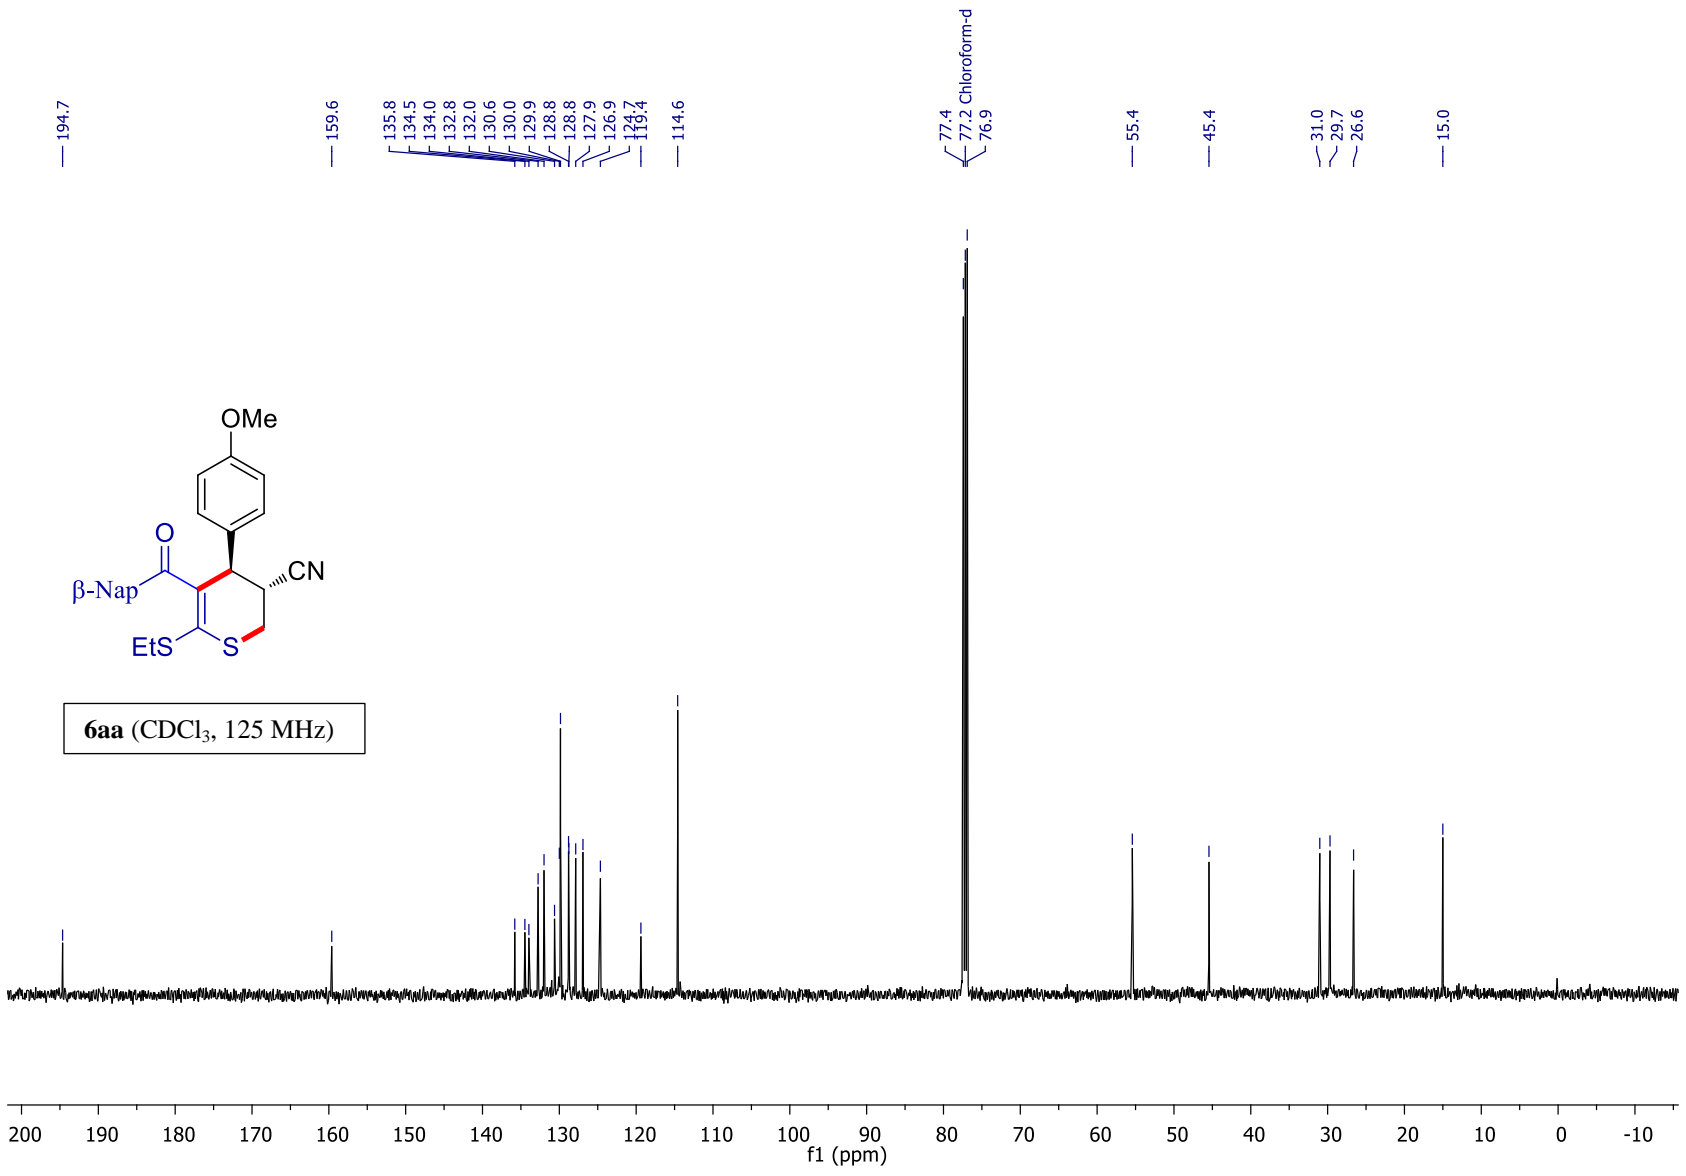

## HRMS Spectra of Compound 3a

Instrument: Thermo Exactive Orbitrap

GCN-SM-60-D #67-105 RT: 0.92-1.05 AV: 39 SB: 217 0.14-1.95 NL: 1.26E7

T: FTMS (1,1) + p ESI Full lock ms [100.00-2000.00]

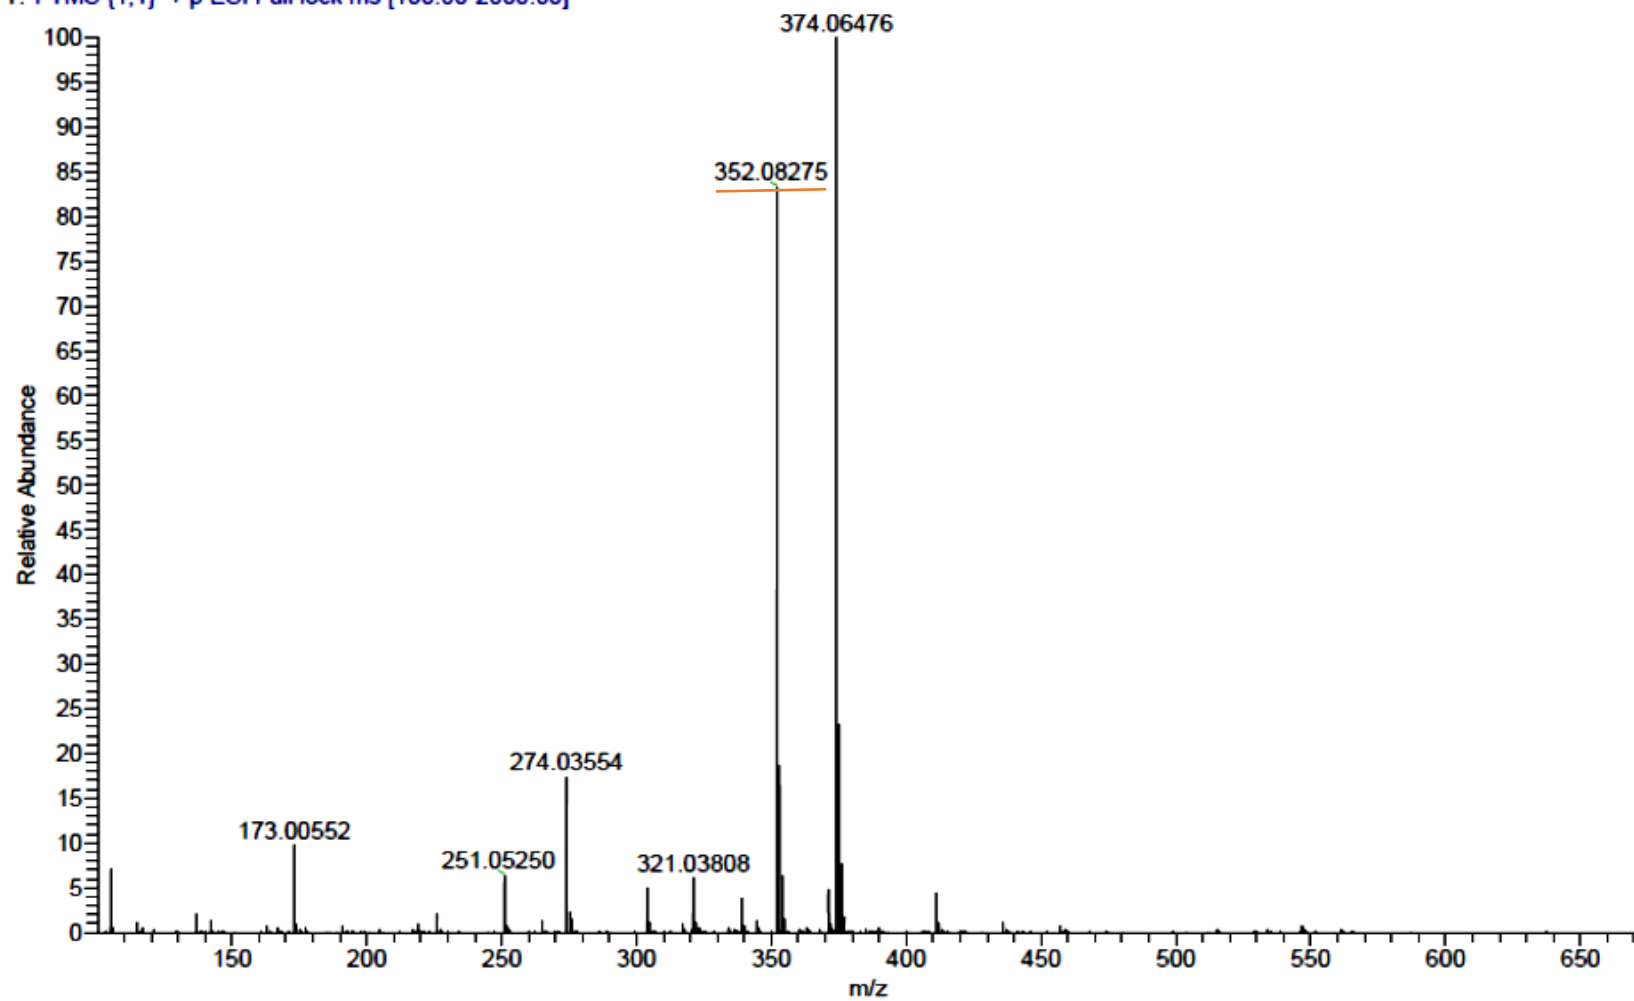

## HRMS Spectra of Compound 5a

Instrument: Thermo Exactive Orbitrap

GCN-SM-60-E #72-78 RT: 1.00-1.06 AV: 7 SB: 139 0.13-1.96 NL: 3.77E5

T: FTMS (1,1) + p ESI Full lock ms [100.00-2000.00]

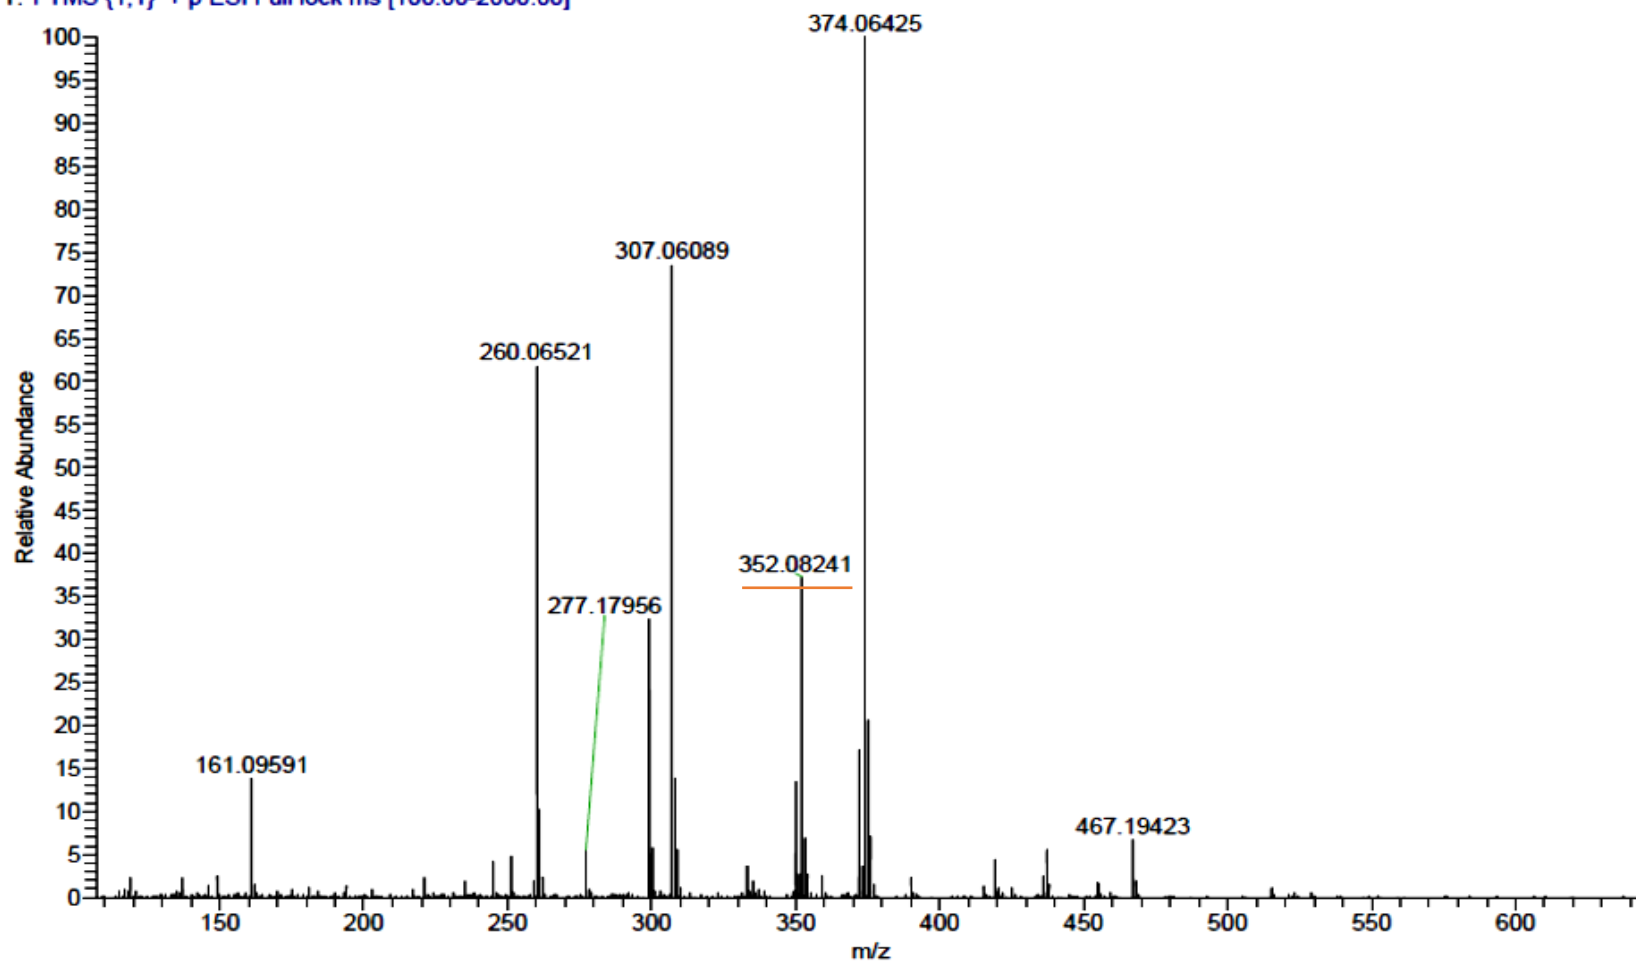

## HRMS Spectra of Compound 6a

Spectrum from SSBHCN-186\_Mrs. Sonam.wif2 (sample 1) - SSBHCN-186, Experiment 1, +IDA TOF MS (100 - 1000) from 0.741 to 0.936 min

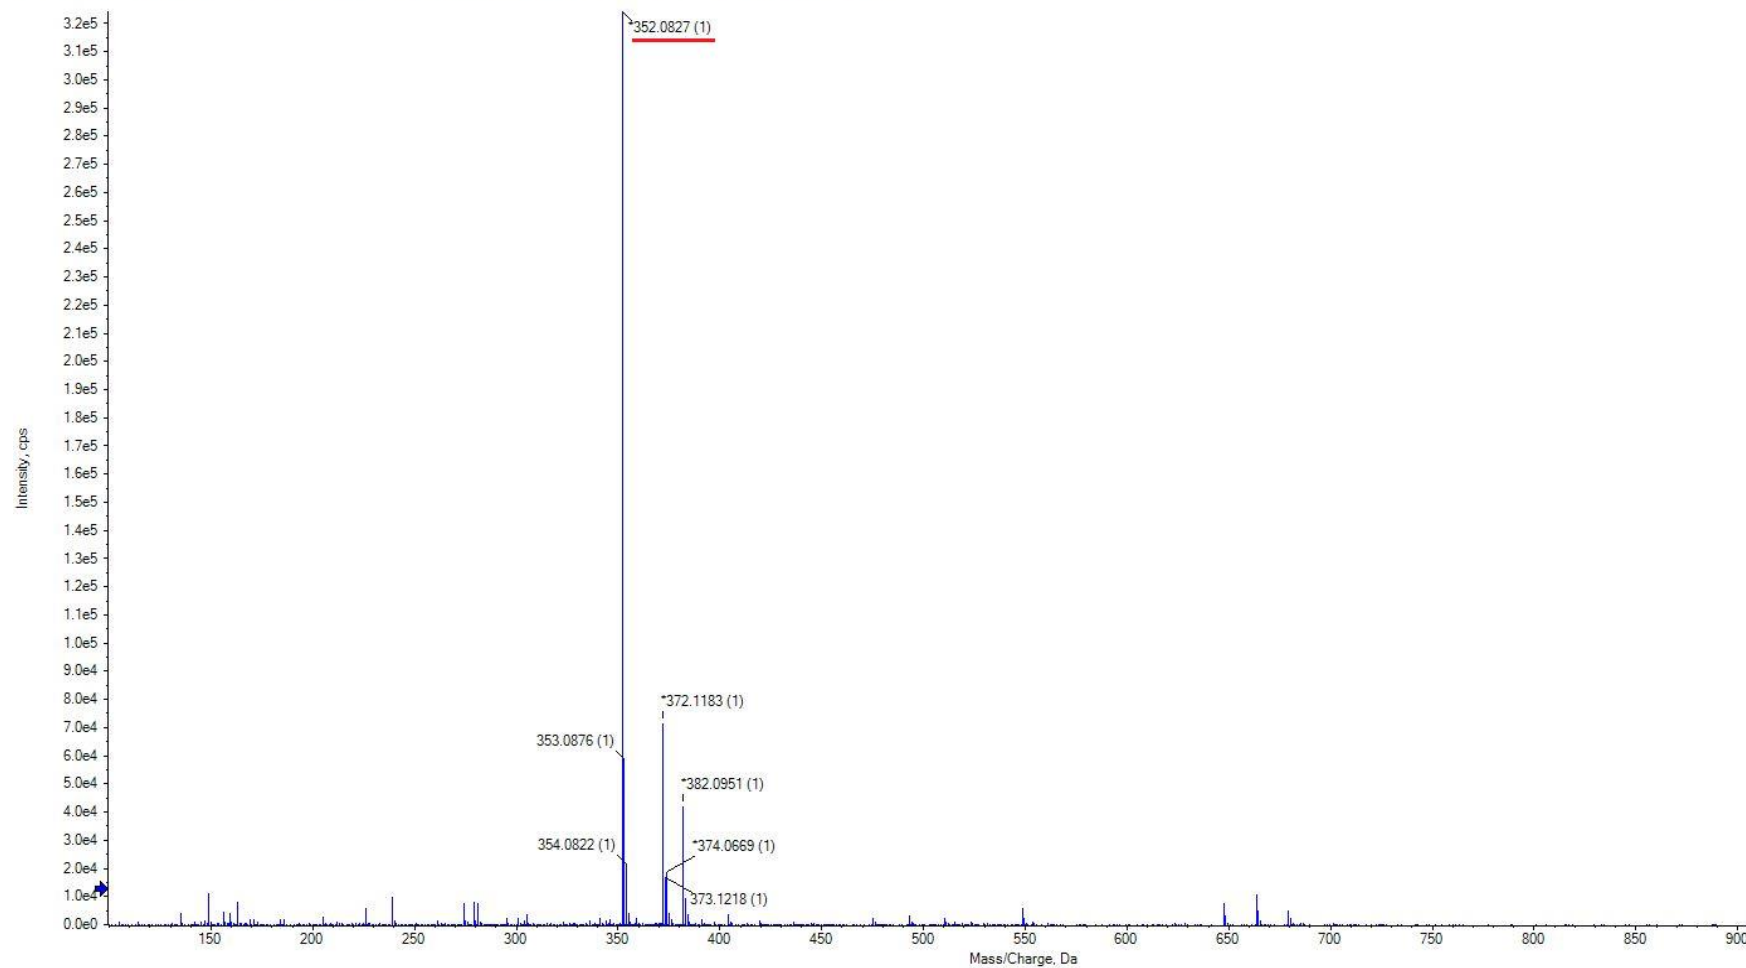



## HRMS Spectra of Compound 6b

Spectrum from SSBHCN-192\_Mrs. Sonam.wiff2 (sample 1) - SSBHCN-192\_ Experiment 1, +IDA TOF MS (100 - 1000) from 0.546 to 0.937 min

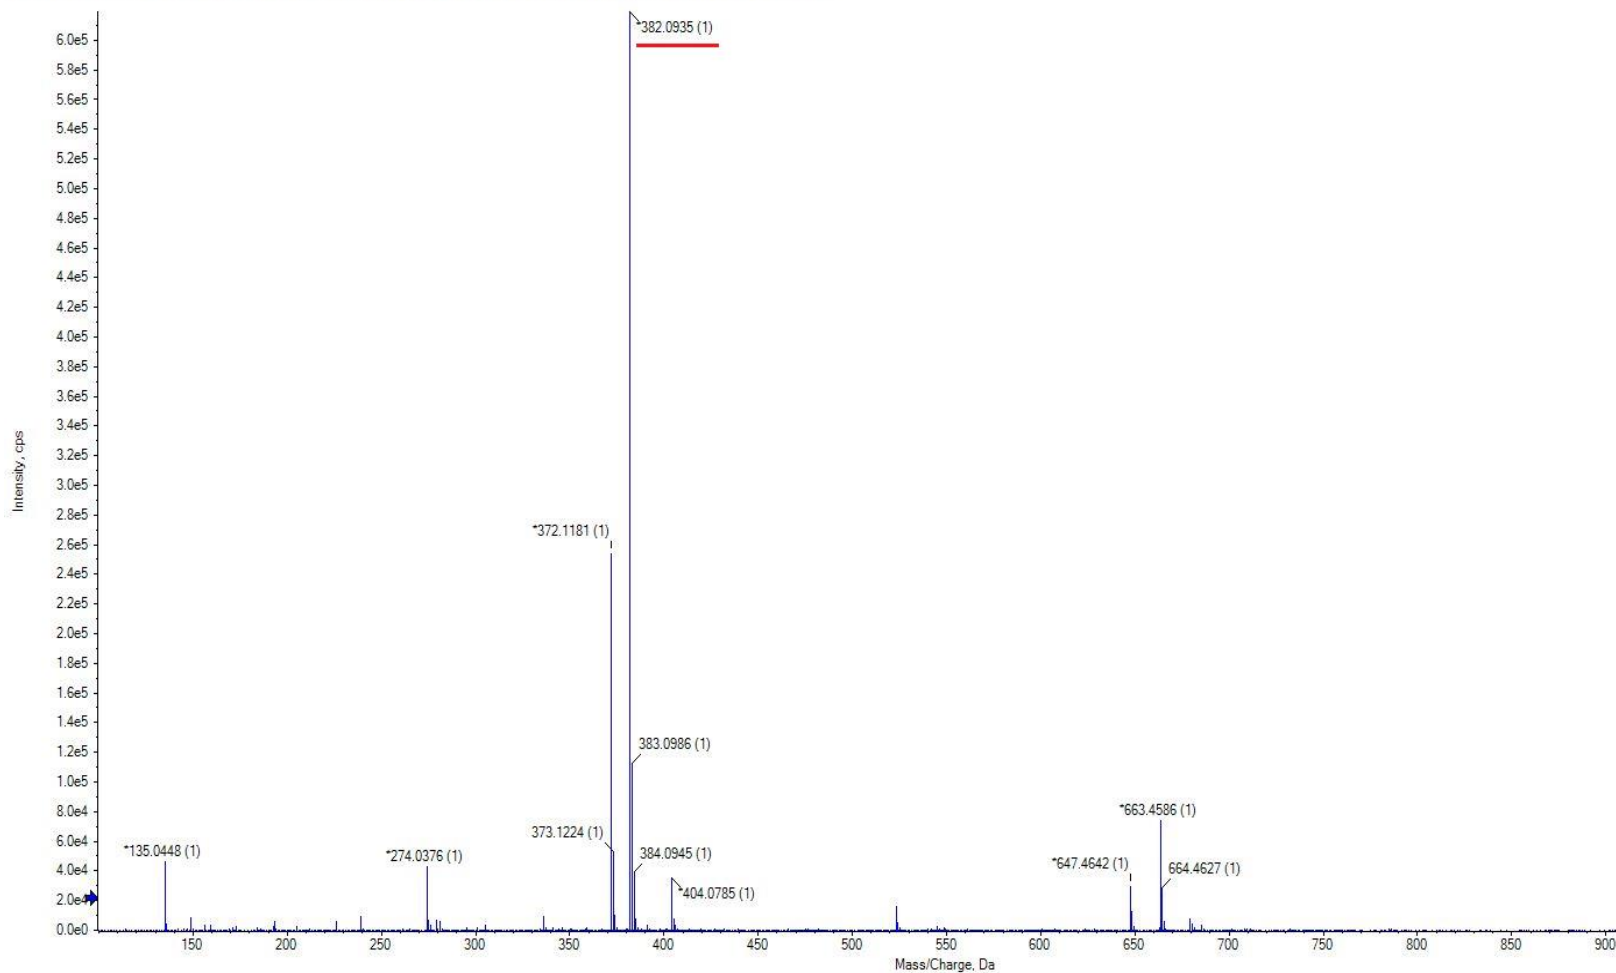

## HRMS Spectra of Compound 6c

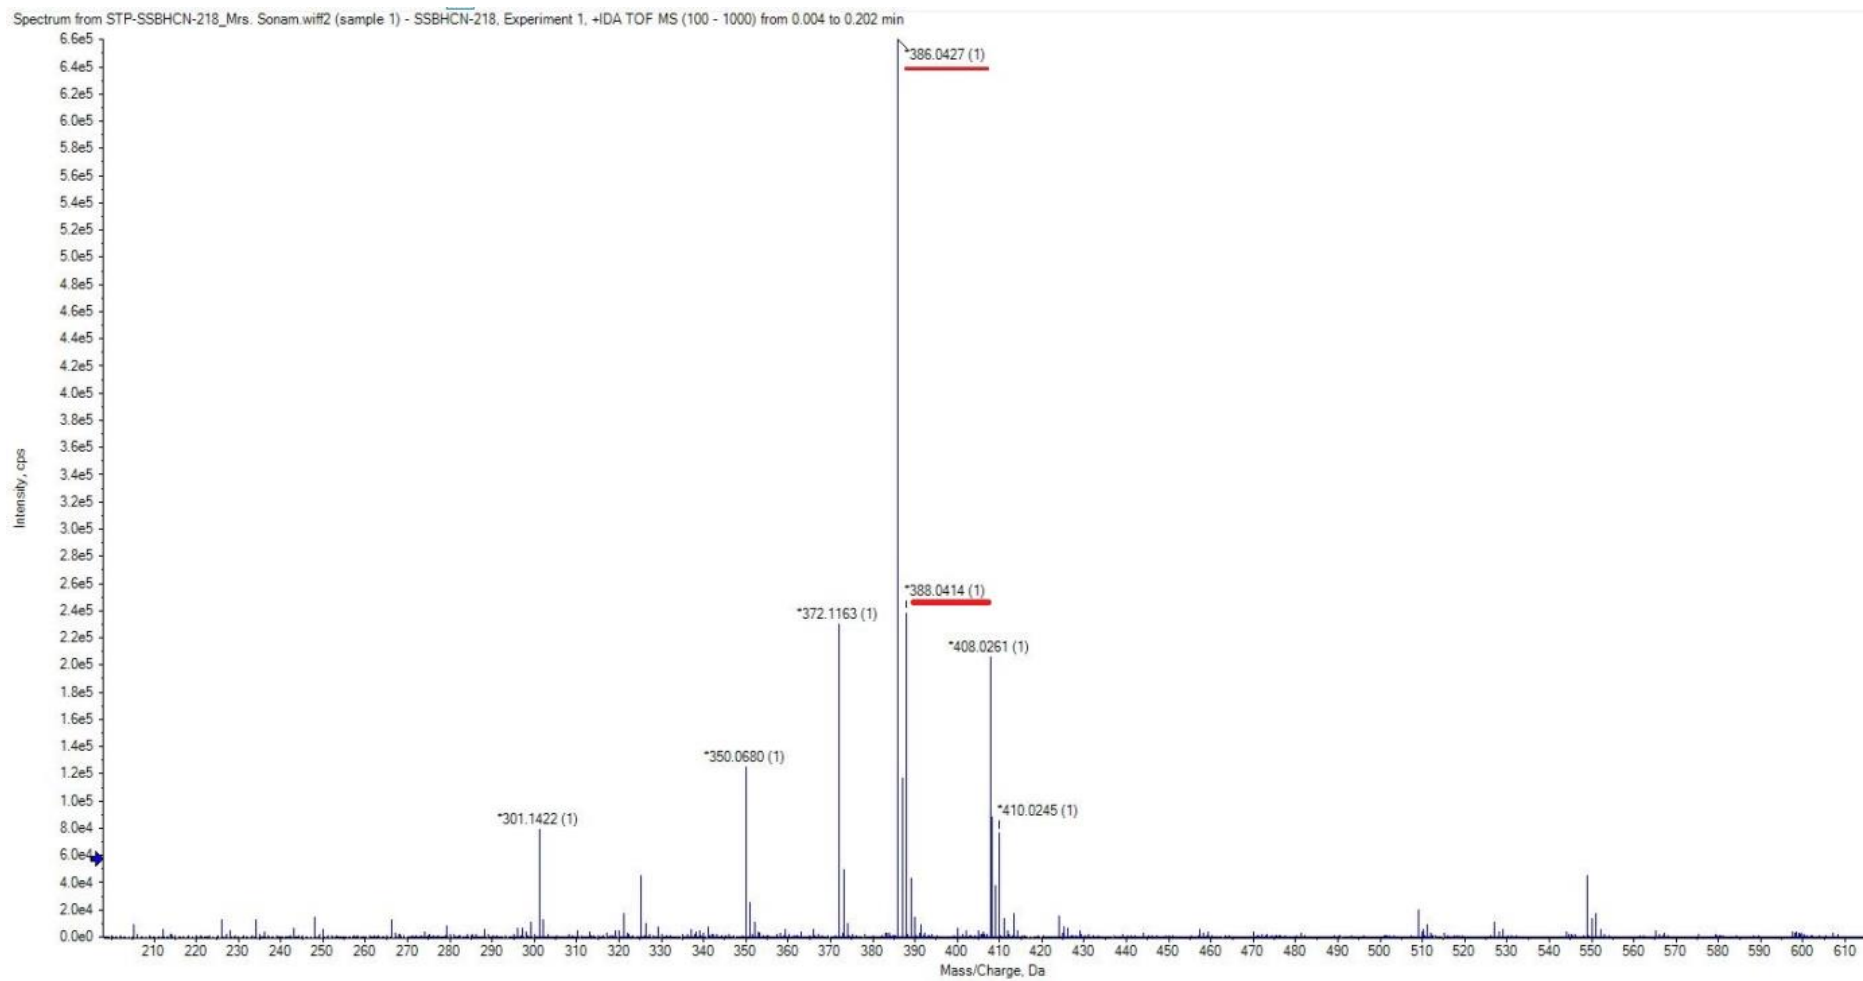

## HRMS Spectra of Compound 6d

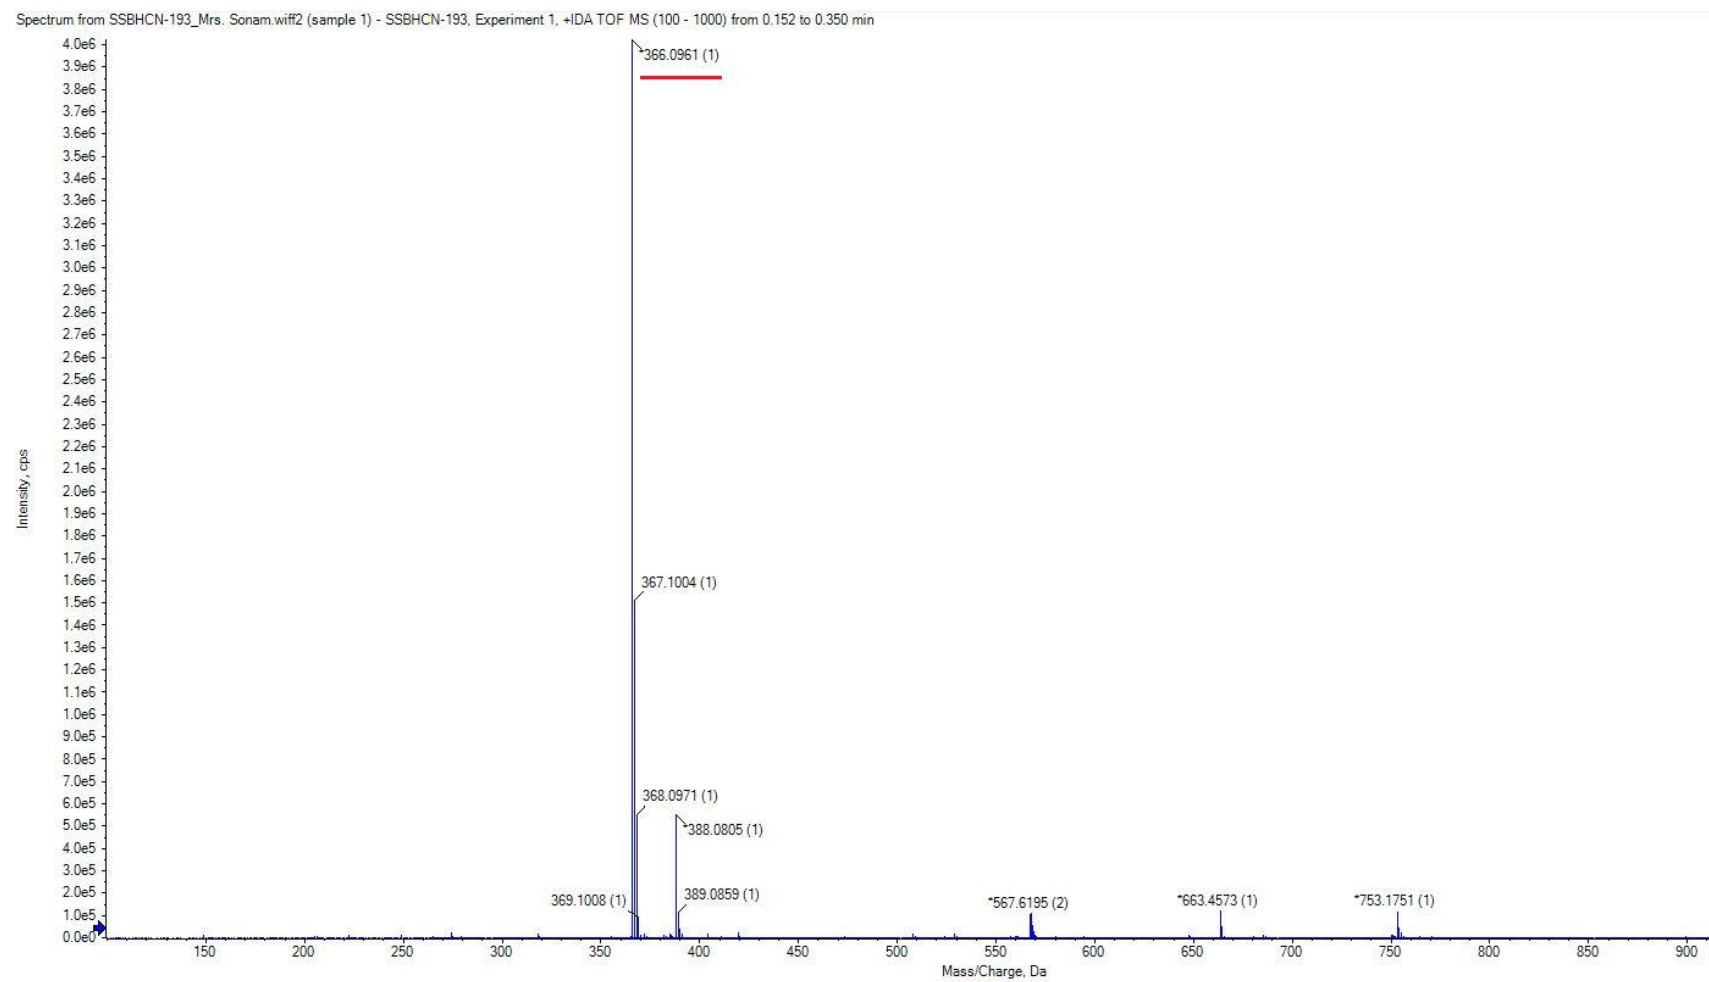

## HRMS Spectra of Compound 6e

Spectrum from SSBHCN-189\_Mrs. Sonam.wiff2 (sample 1) - SSBHCN-189, Experiment 1, +IDA TOF MS (100 - 1000) from 0.299 to 0.495 min

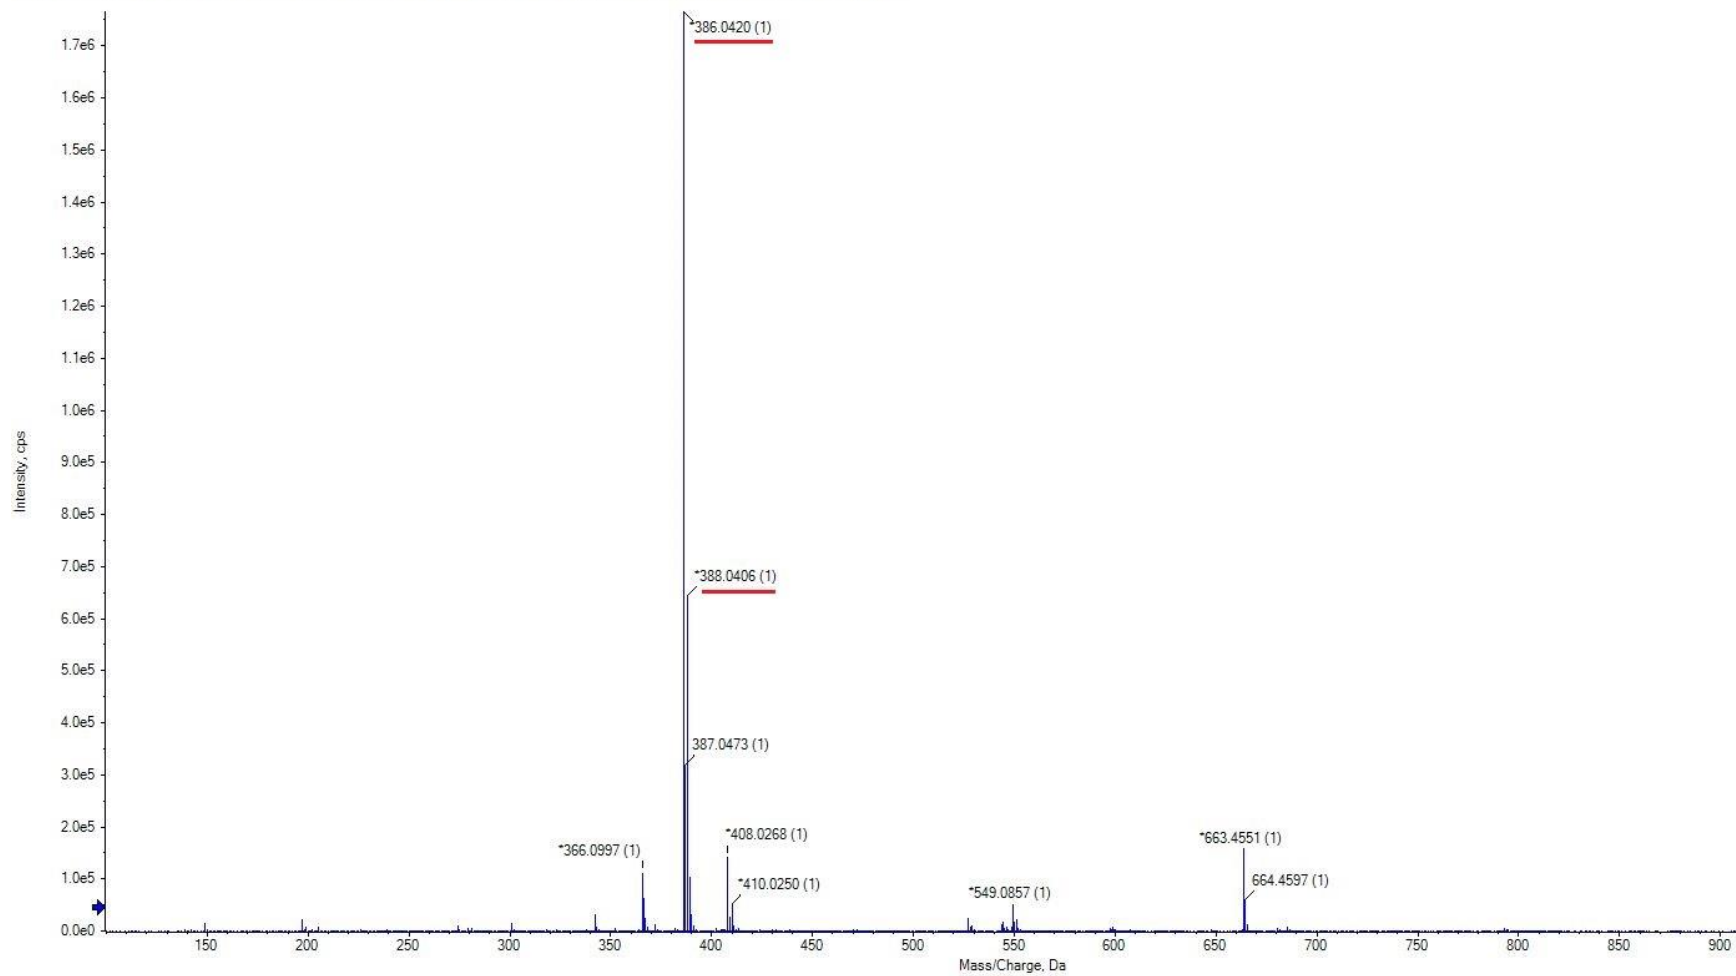

## HRMS Spectra of Compound 6f

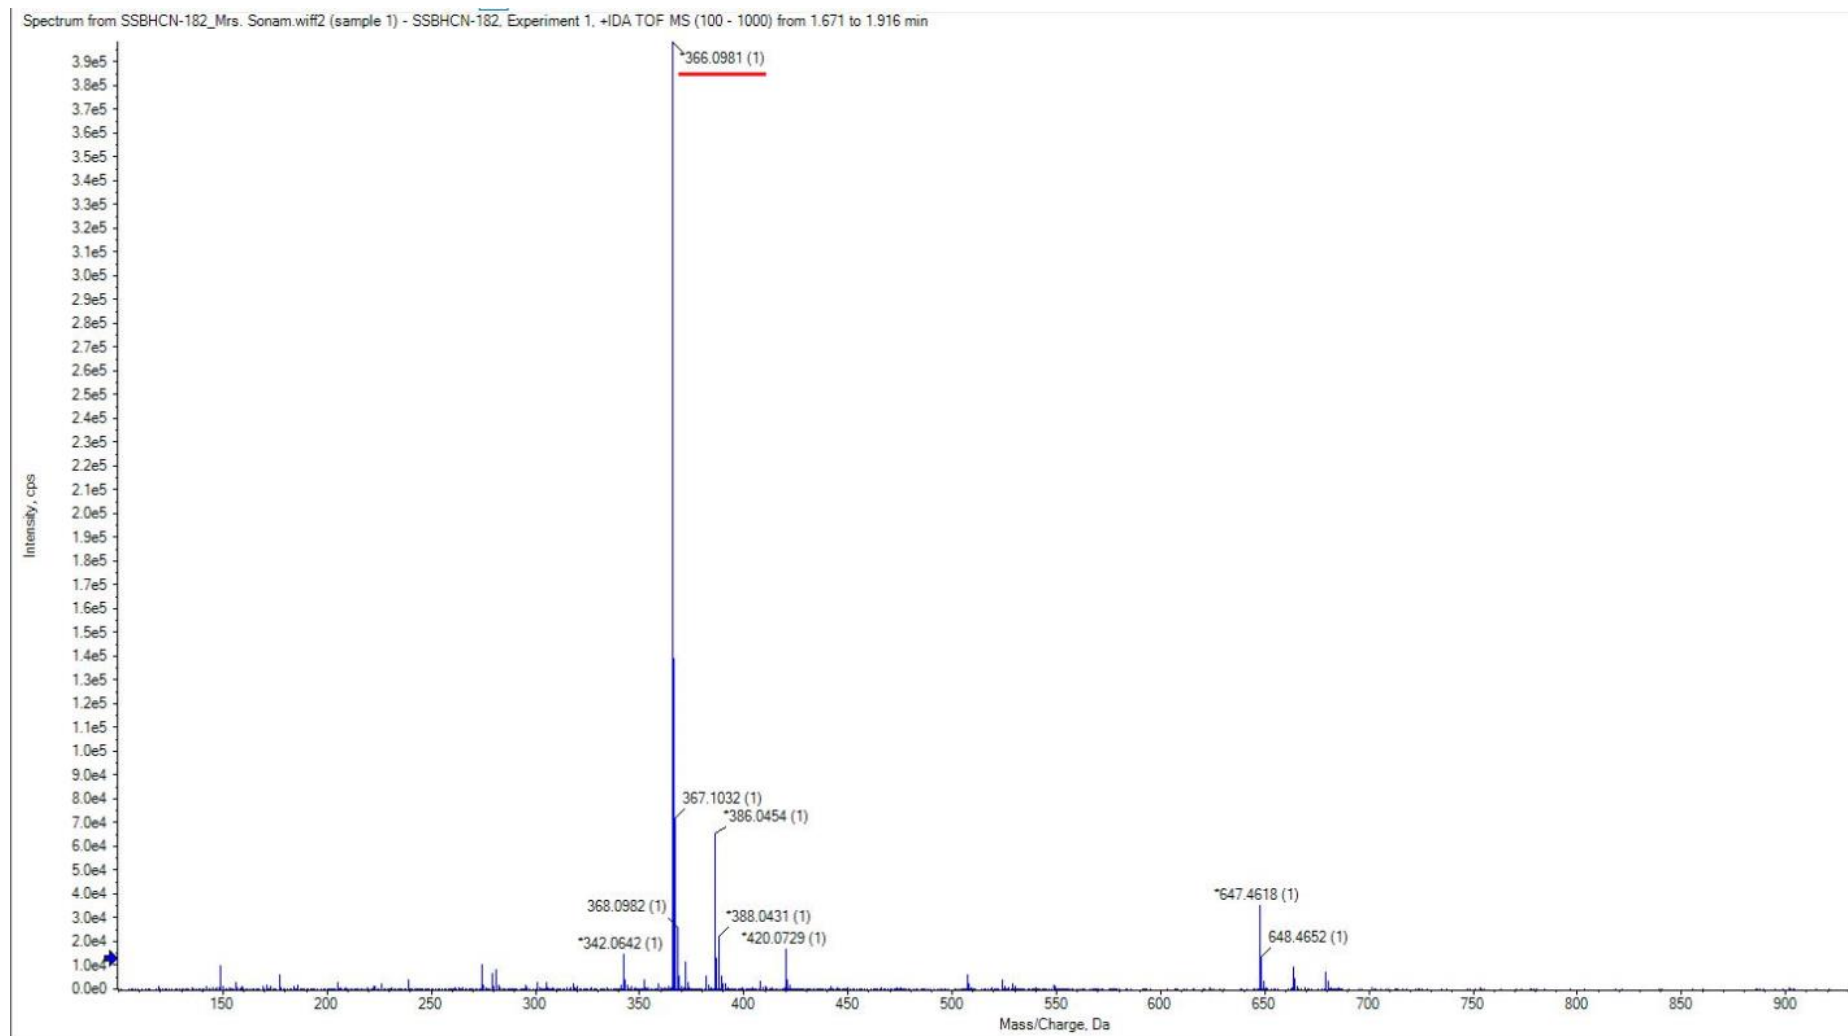

## HRMS Spectra of Compound 6g

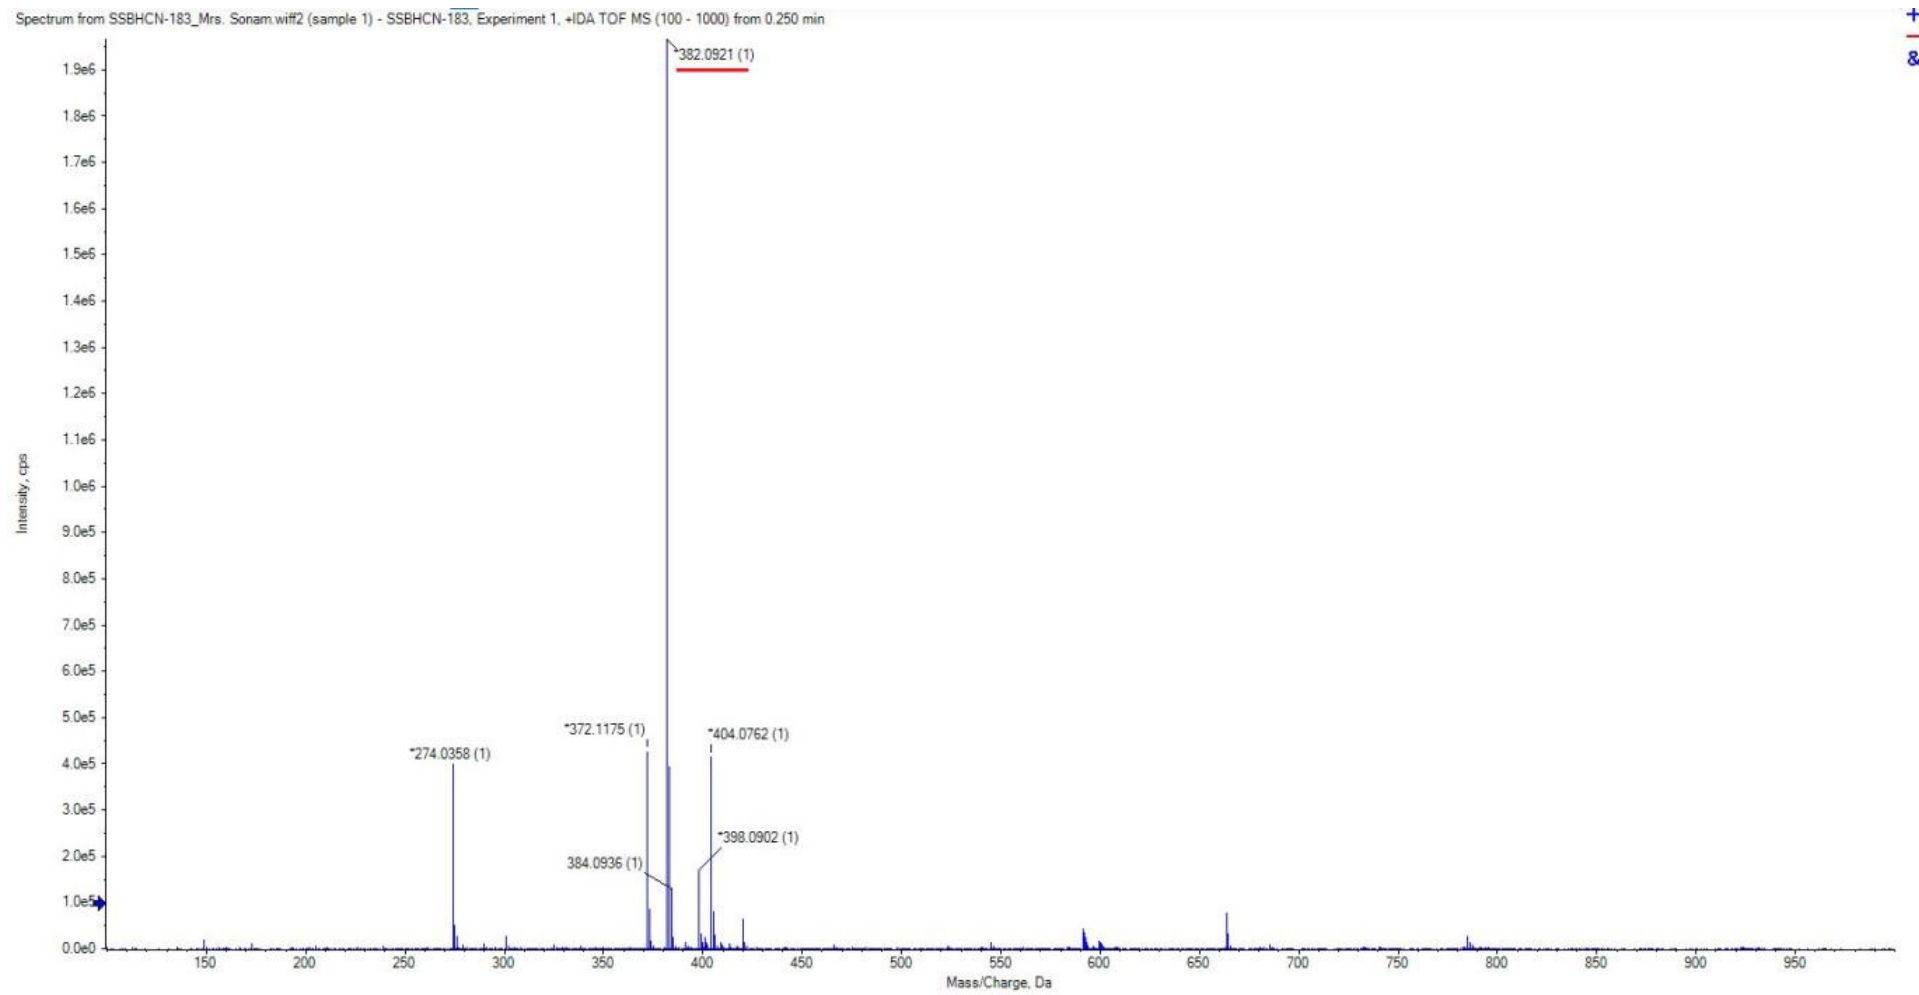

## HRMS Spectra of Compound 6h

Spectrum from SSBHCN-188\_Mrs. Sonam.wif2 (sample 1) - SSBHCN-188, Experiment 1, +DA TOF MS (100 - 1000) from 0.004 to 0.201 min

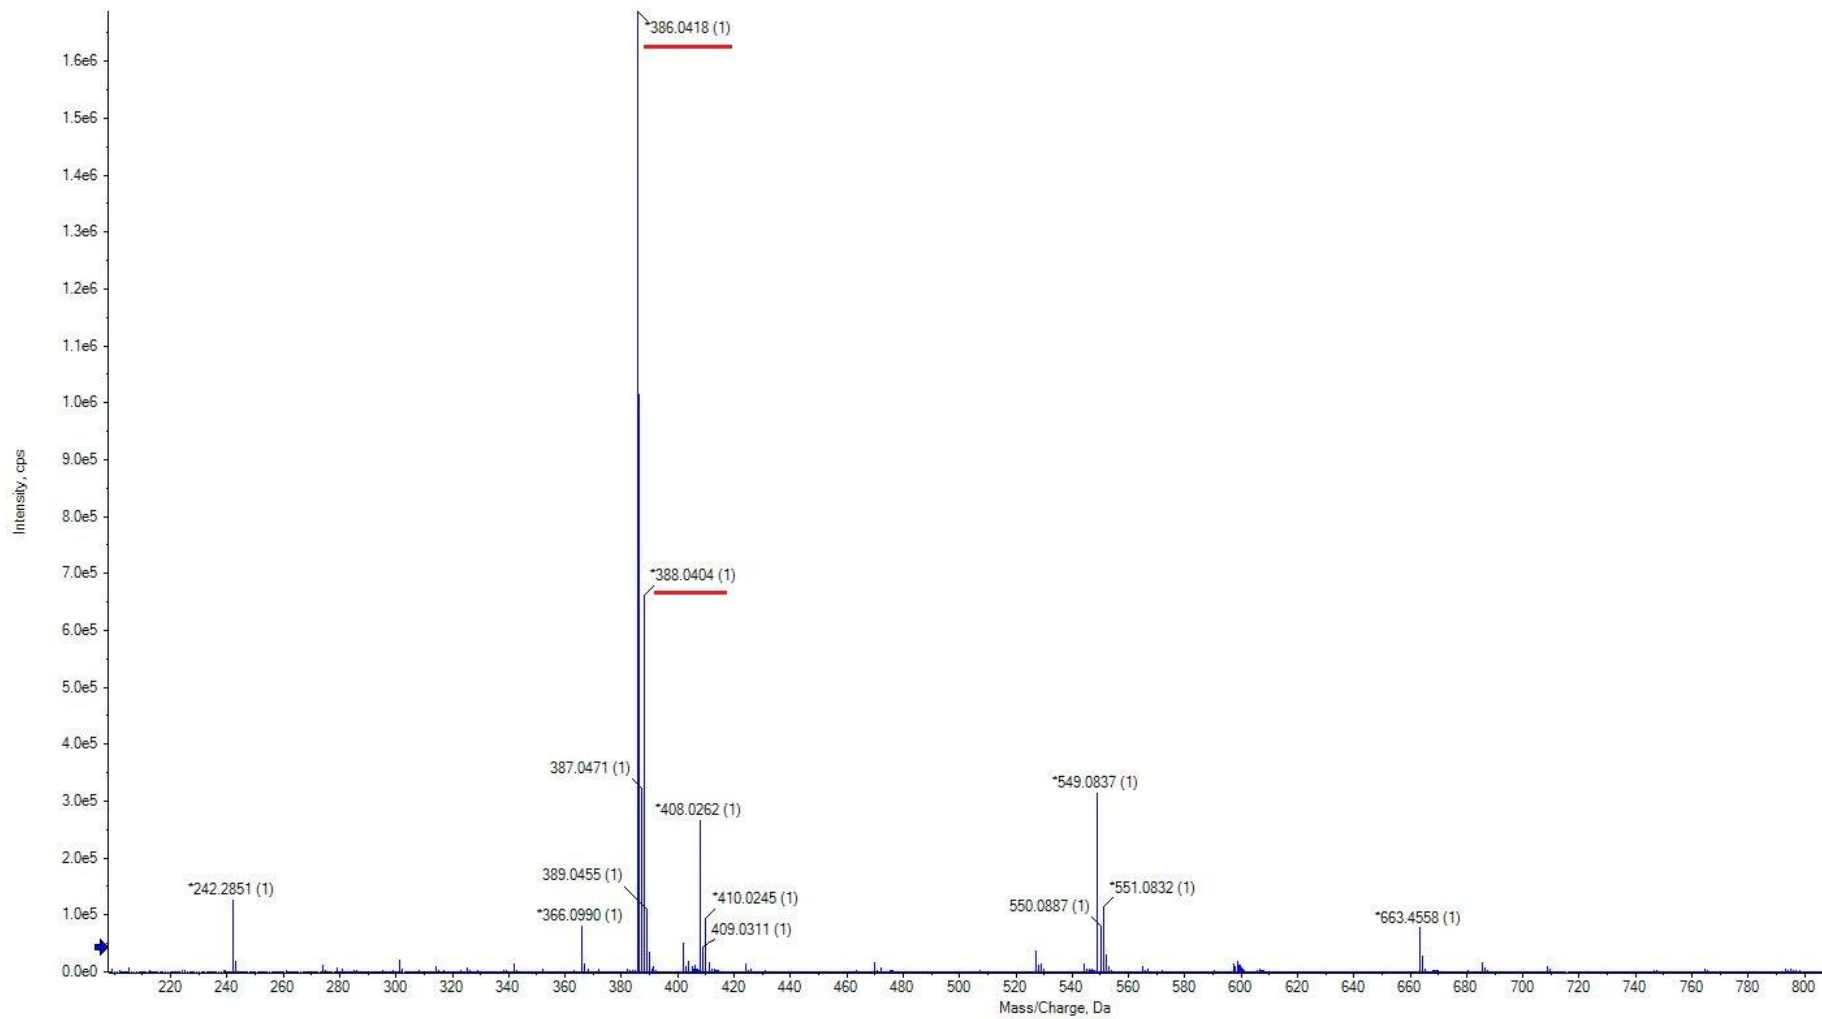

## HRMS Spectra of Compound 6i

Spectrum from SSBHCN-205\_Mrs. Sonam.wif2 (sample 1) - SSBHCN-205, Experiment 1, +IDA TOF MS (100 - 1000) from 0.839 to 1.035 min

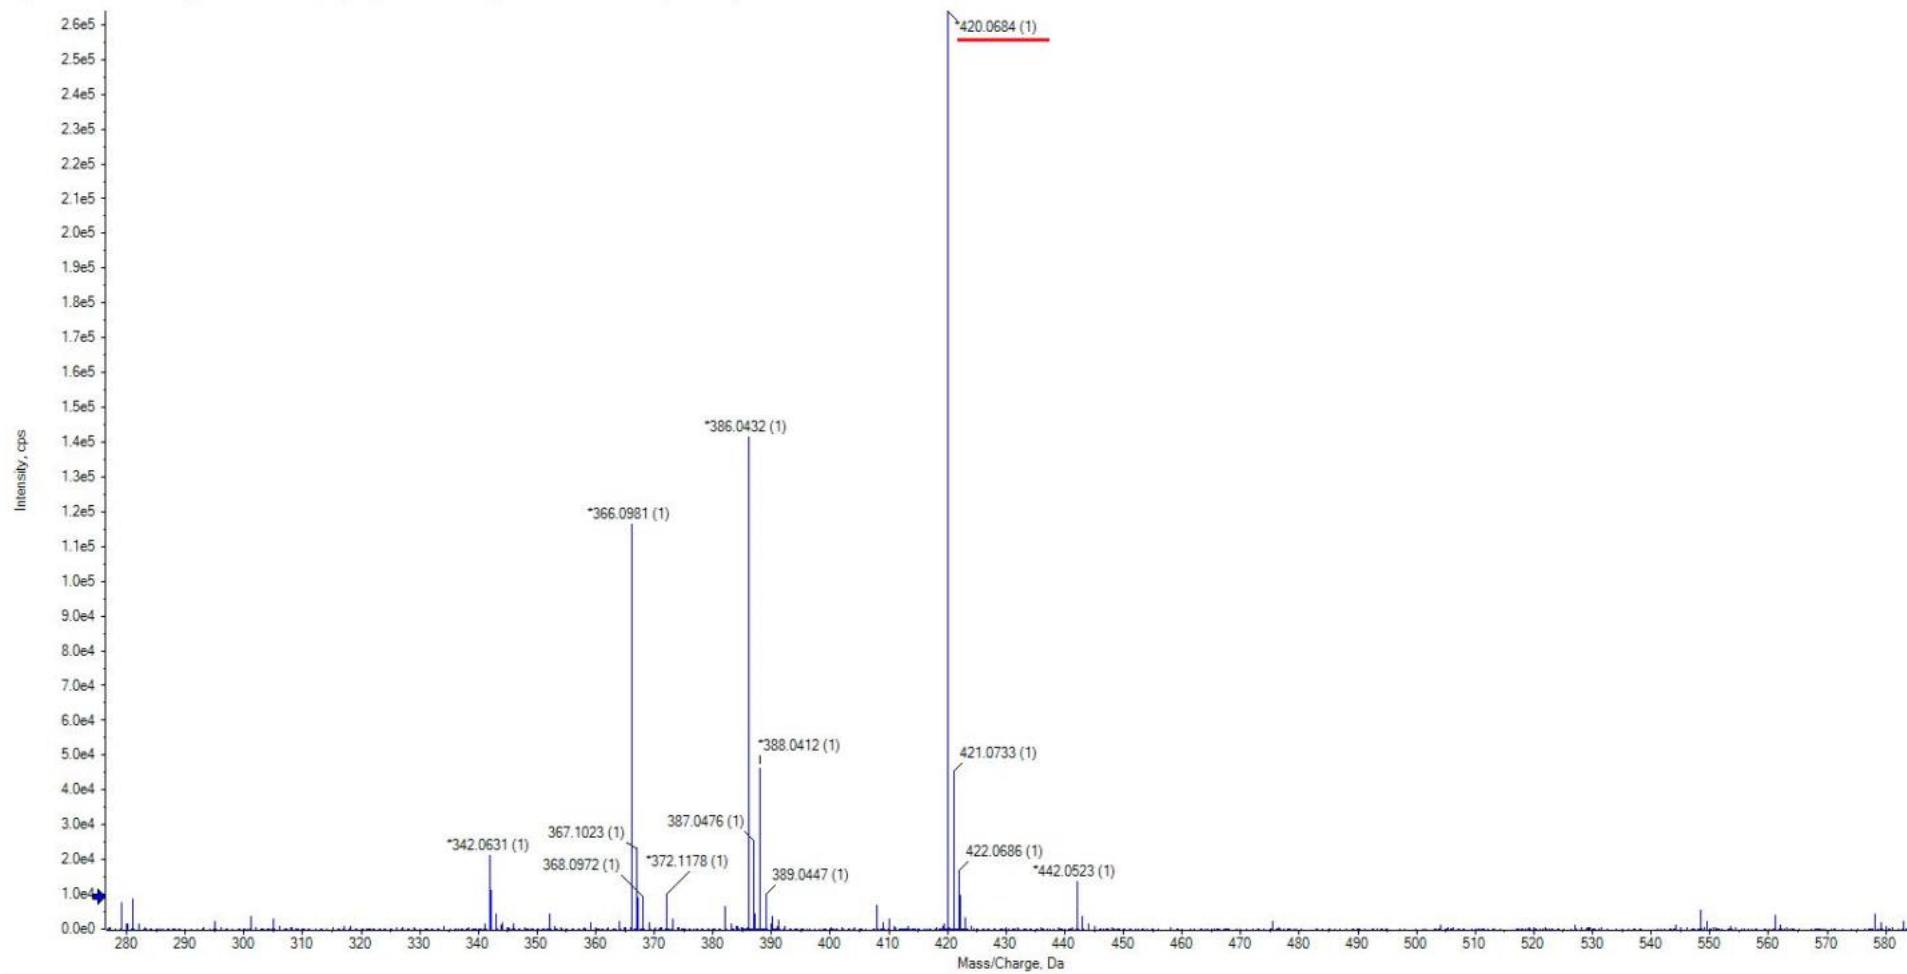



## HRMS Spectra of Compound 6j

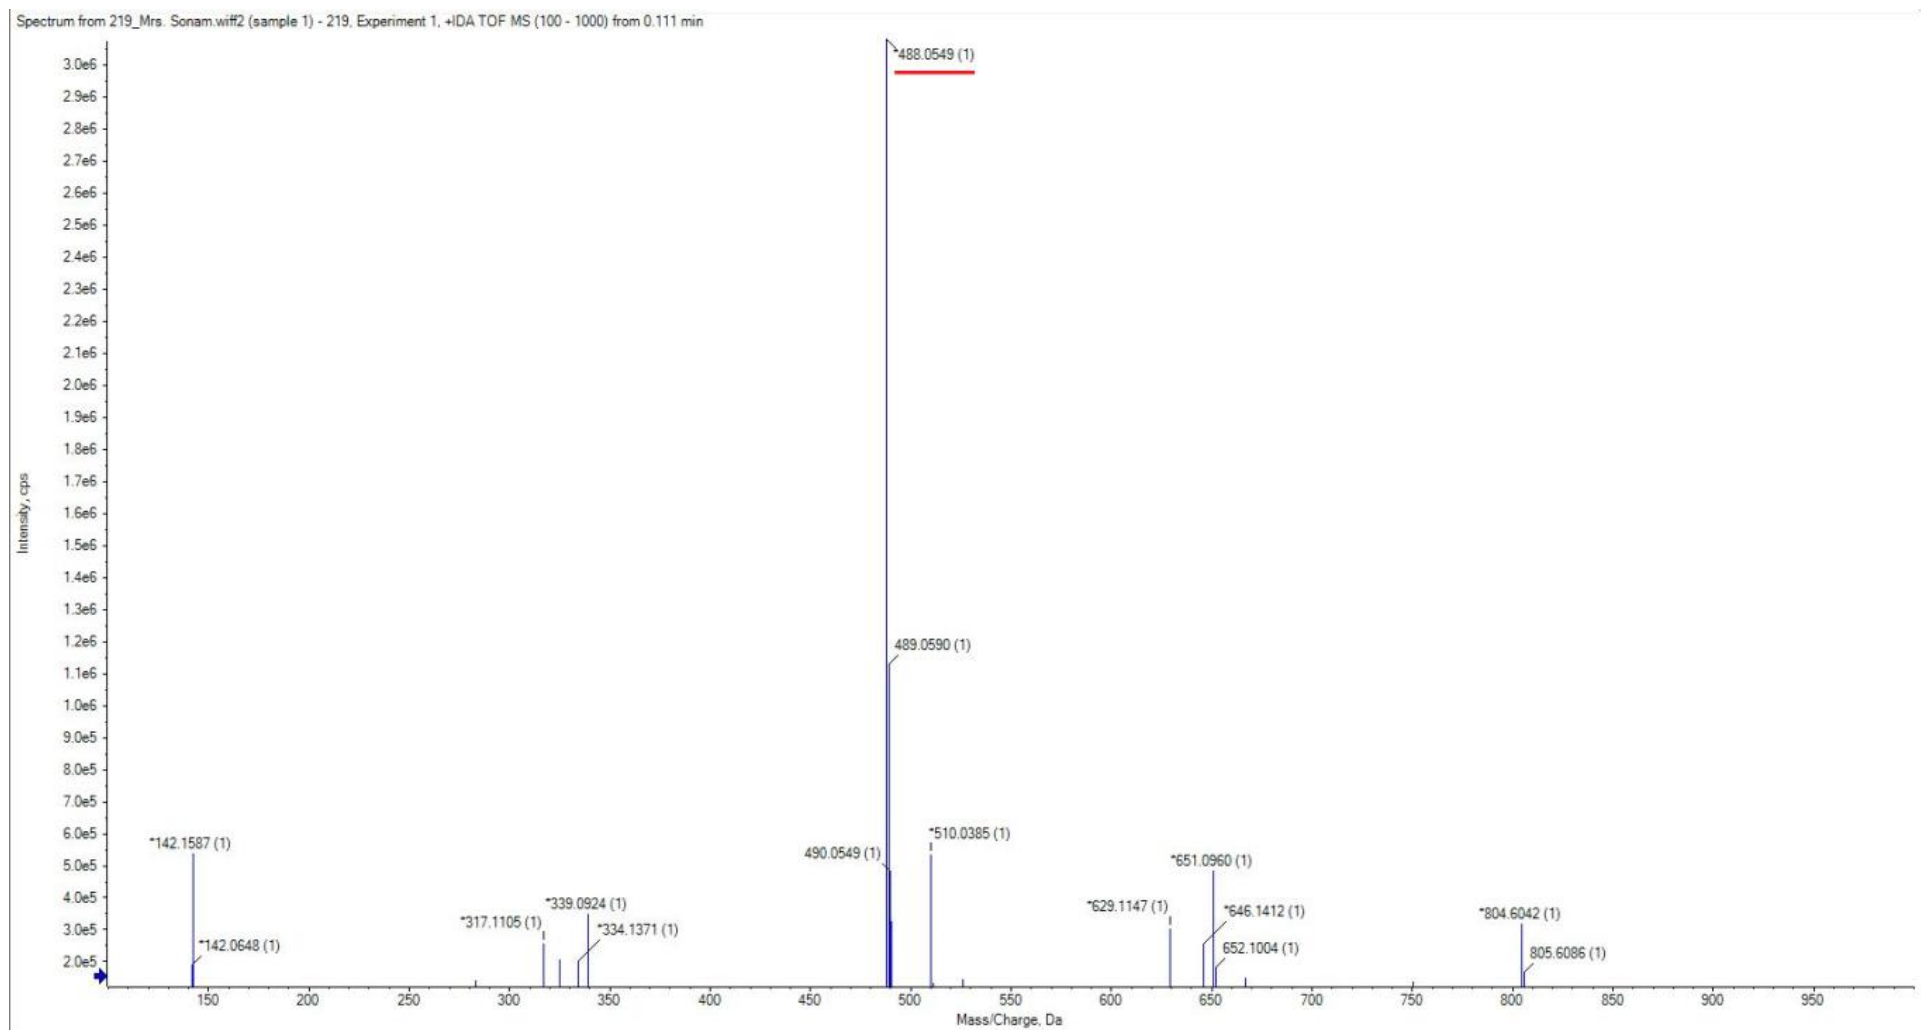

## HRMS Spectra of Compound 6k

Spectrum from SSBHCN-187-B\_Mrs. Sonam.wiff2 (sample 1) - SSBHCN-187-B, Experiment 1, +IDA TOF MS (100 - 1000) from 0.398 to 0.594 min

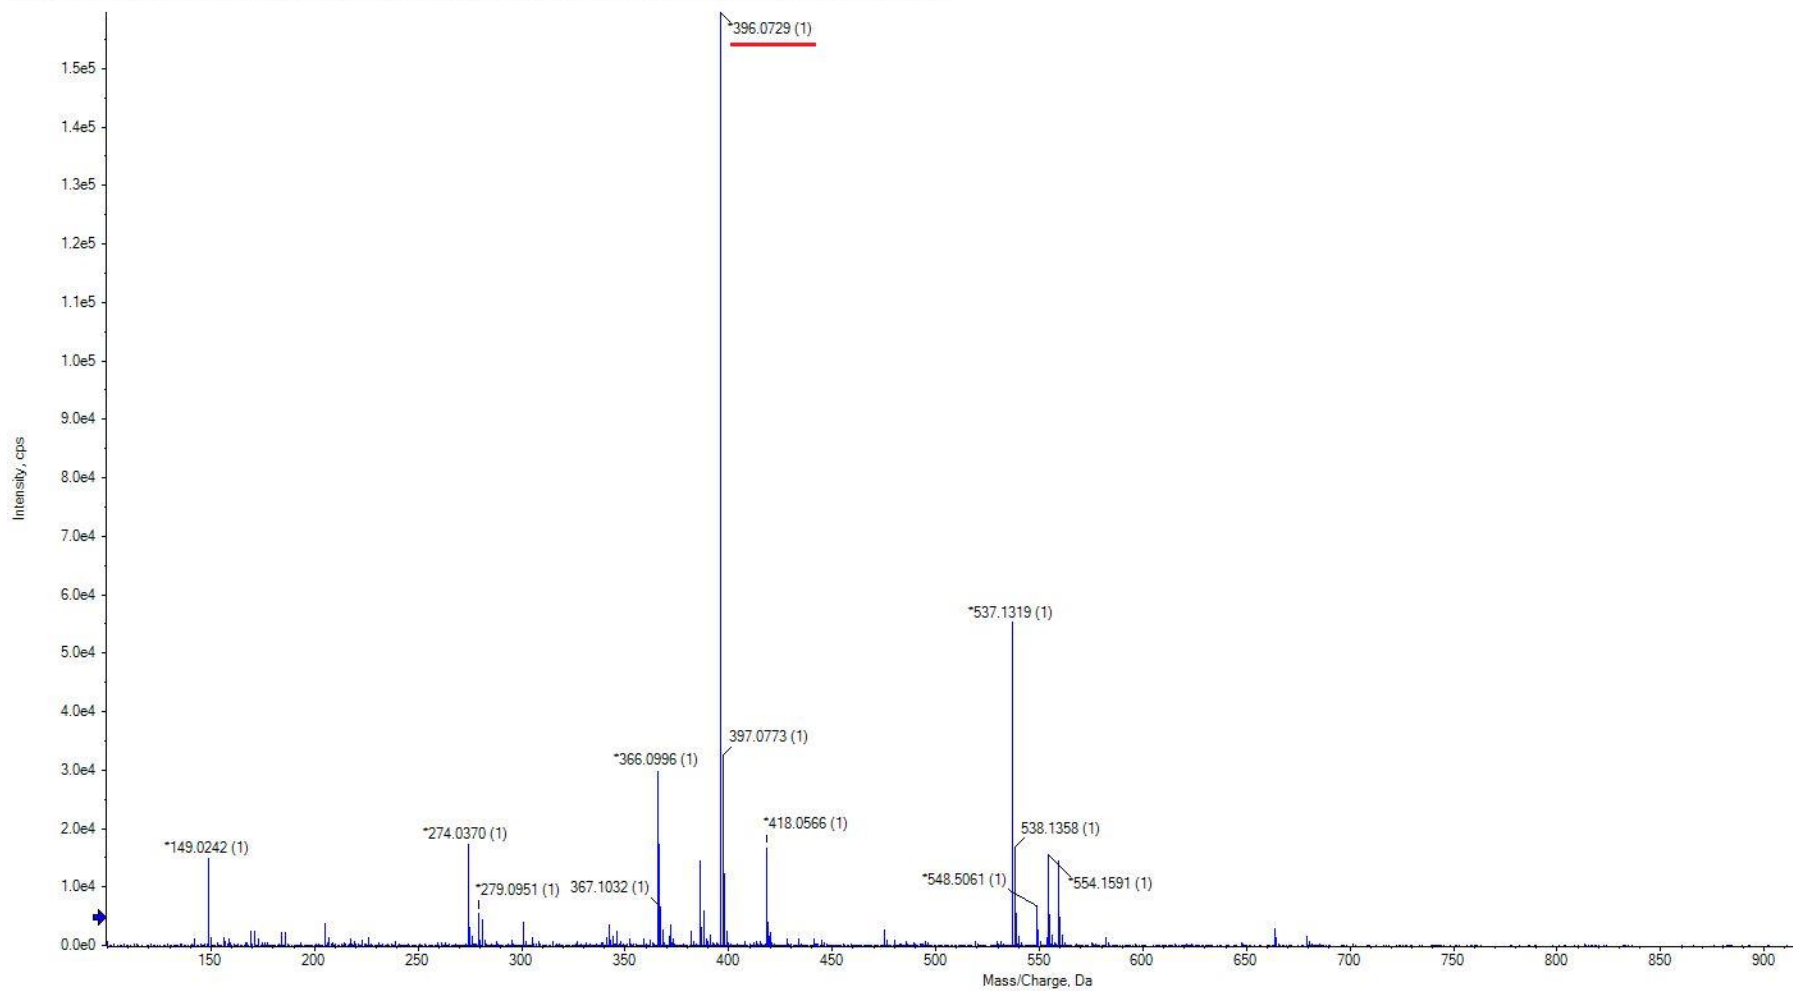

## HRMS Spectra of Compound 6l

Spectrum from SSBHCN-150\_Mrs. Sonam Soni.wiff2 (sample 1) - SSBHCN-150, Experiment 1, -HDA TOF MS (100 - 1000) from 0.053 to 0.252 min

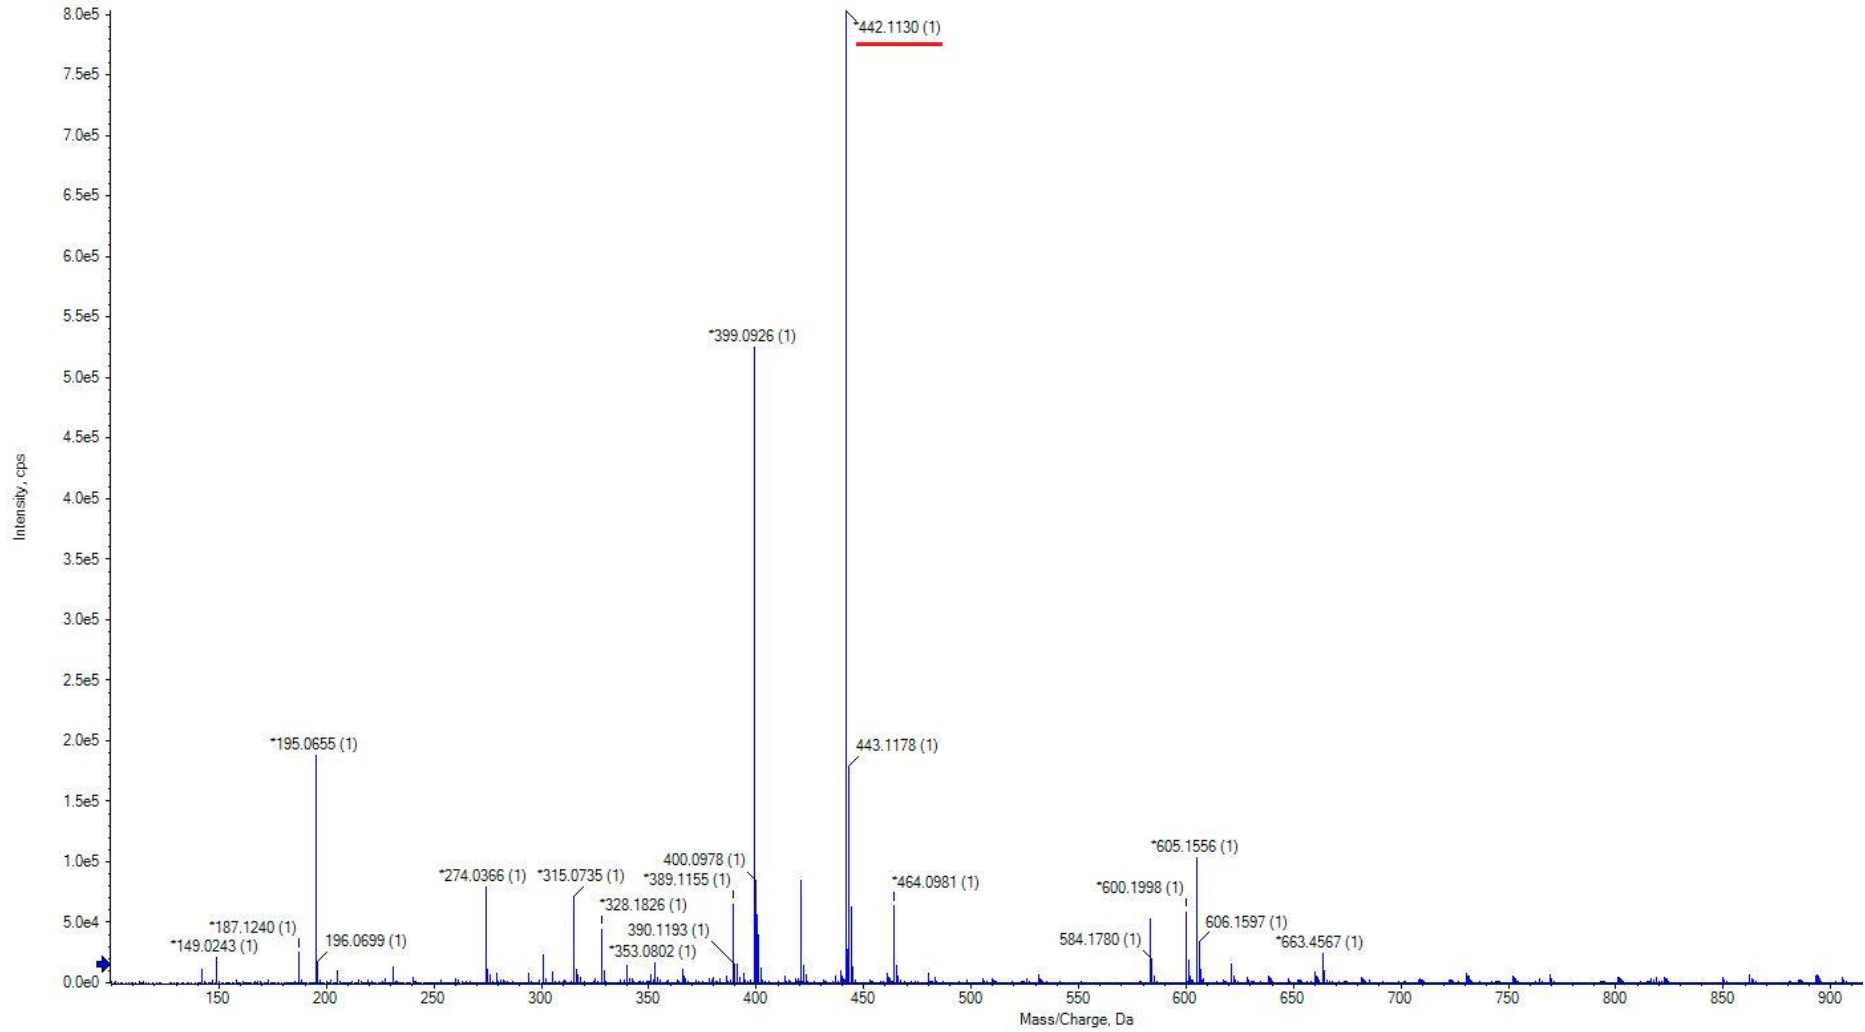

## HRMS Spectra of Compound 6m

Spectrum from SSBHCN-199\_Mrs. Sonam.wiff2 (sample 1) - SSBHCN-199, Experiment 1, +IDA TOF MS (100 - 1000) from 0.890 min.

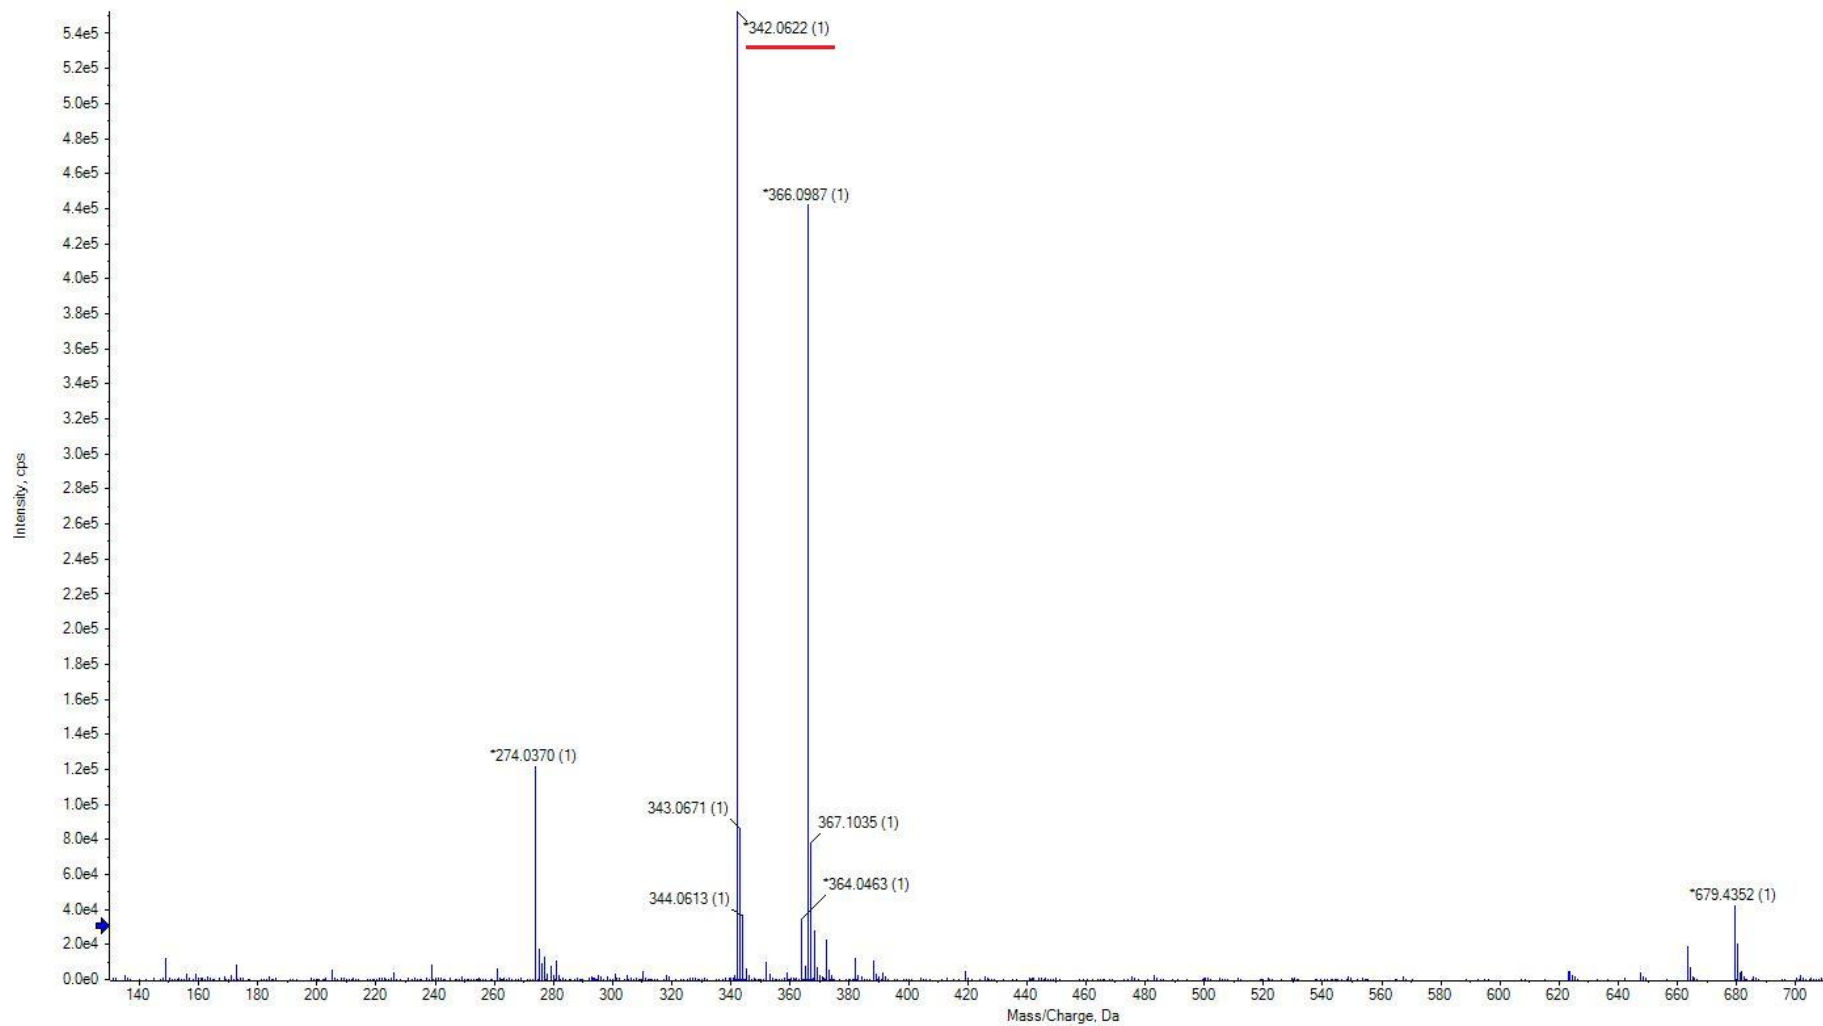

## HRMS Spectra of Compound 6n

Spectrum from SSBHCN-200\_Mrs. Sonam.wiff2 (sample 1) - SSBHCN-200, Experiment 1, +IDA TOF MS (100 - 1000) from 0.201 to 0.447 min

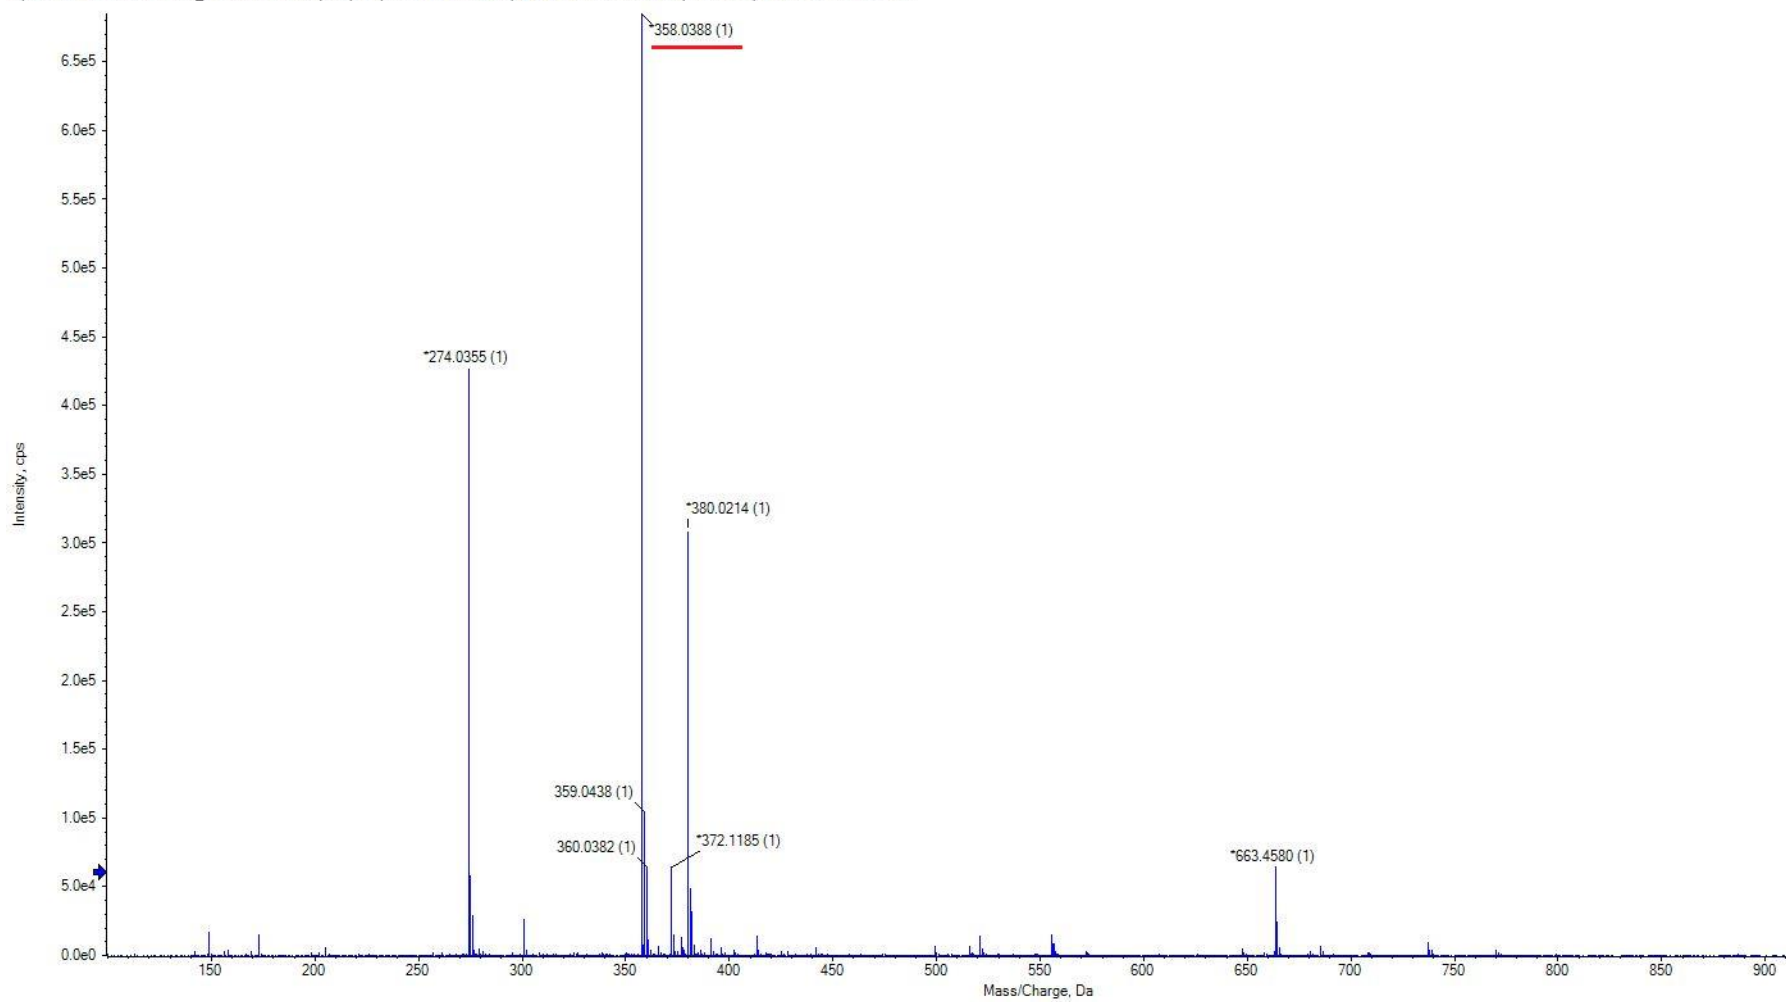

## HRMS Spectra of Compound 6o

Spectrum from SSBHCN-201\_Mrs. Sonam Soni.wiff2 (sample 1) - SSBHCN-201, Experiment 1, +IDA TOF MS (100 - 1000) from 1.718 to 1.865 min

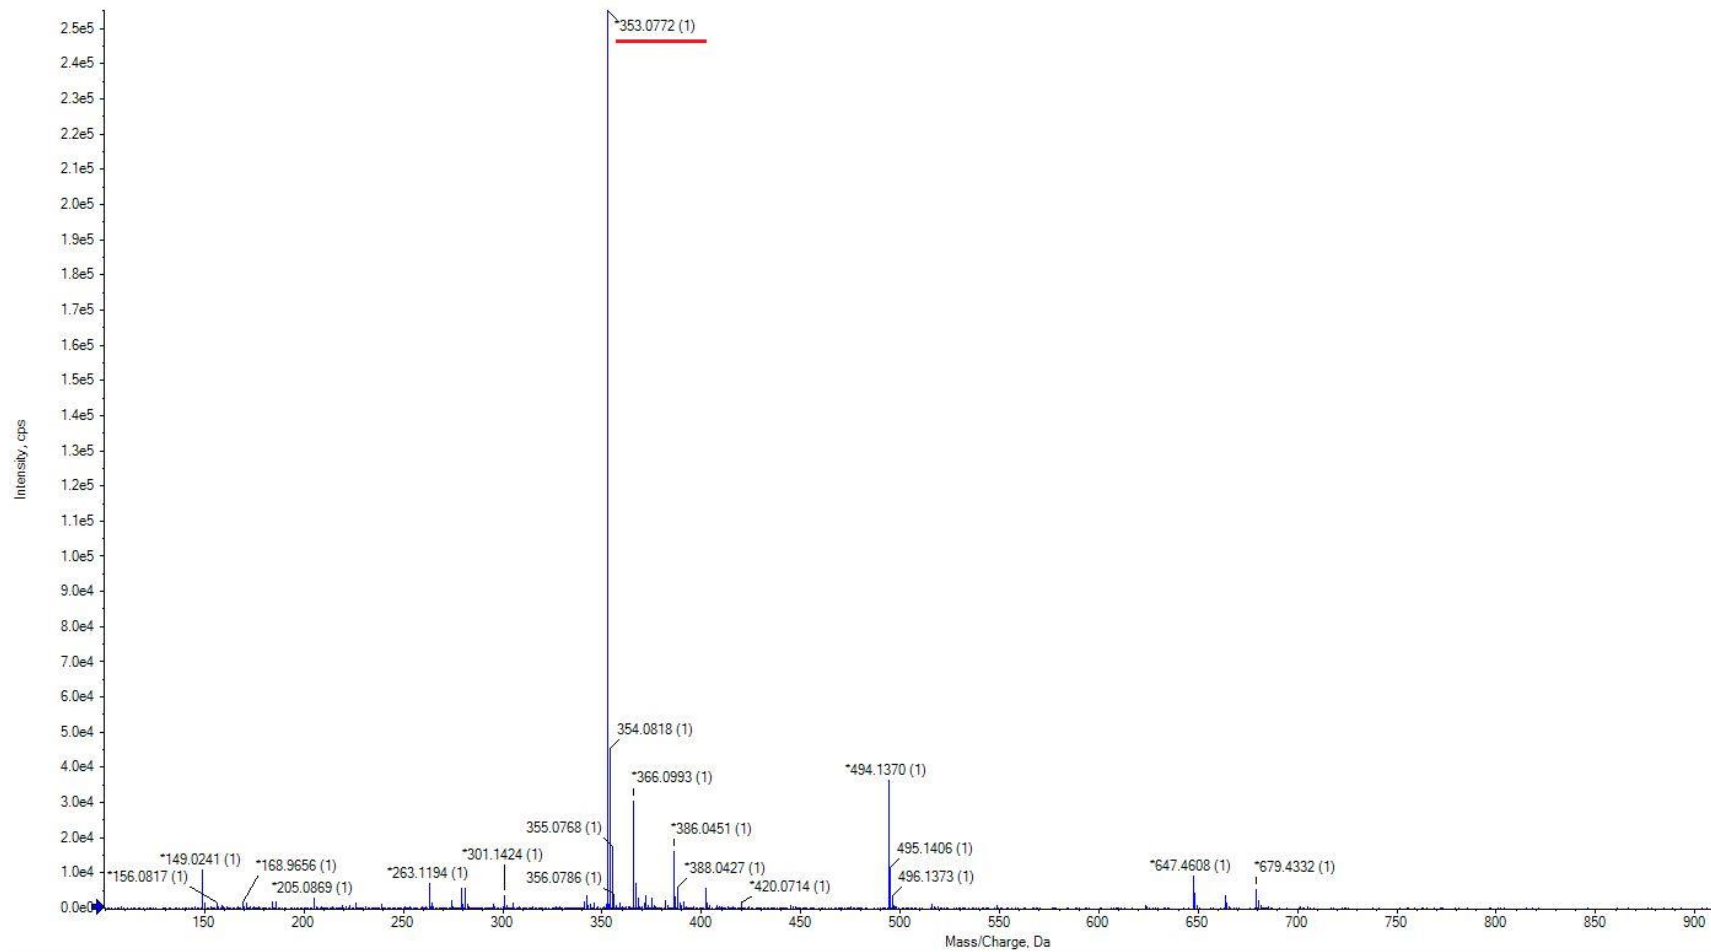

## HRMS Spectra of Compound 6p

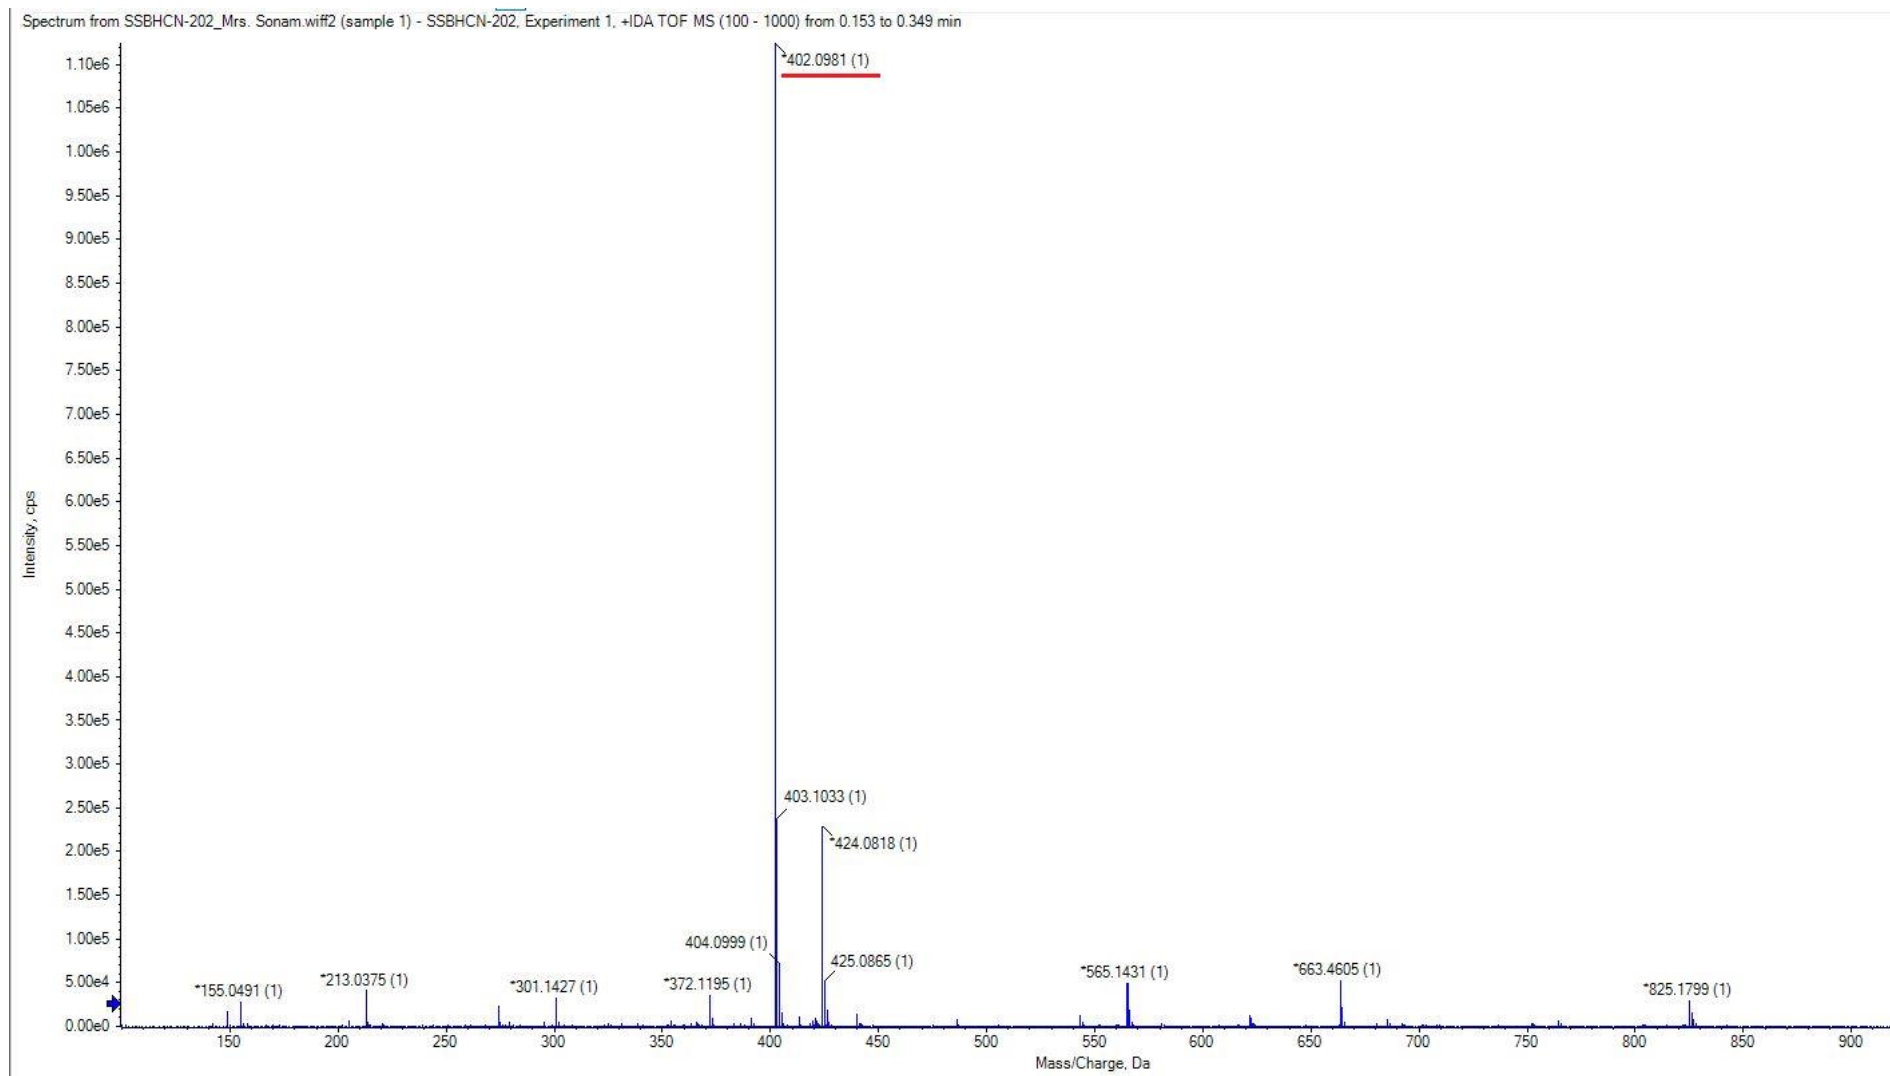

## HRMS Spectra of Compound 6q

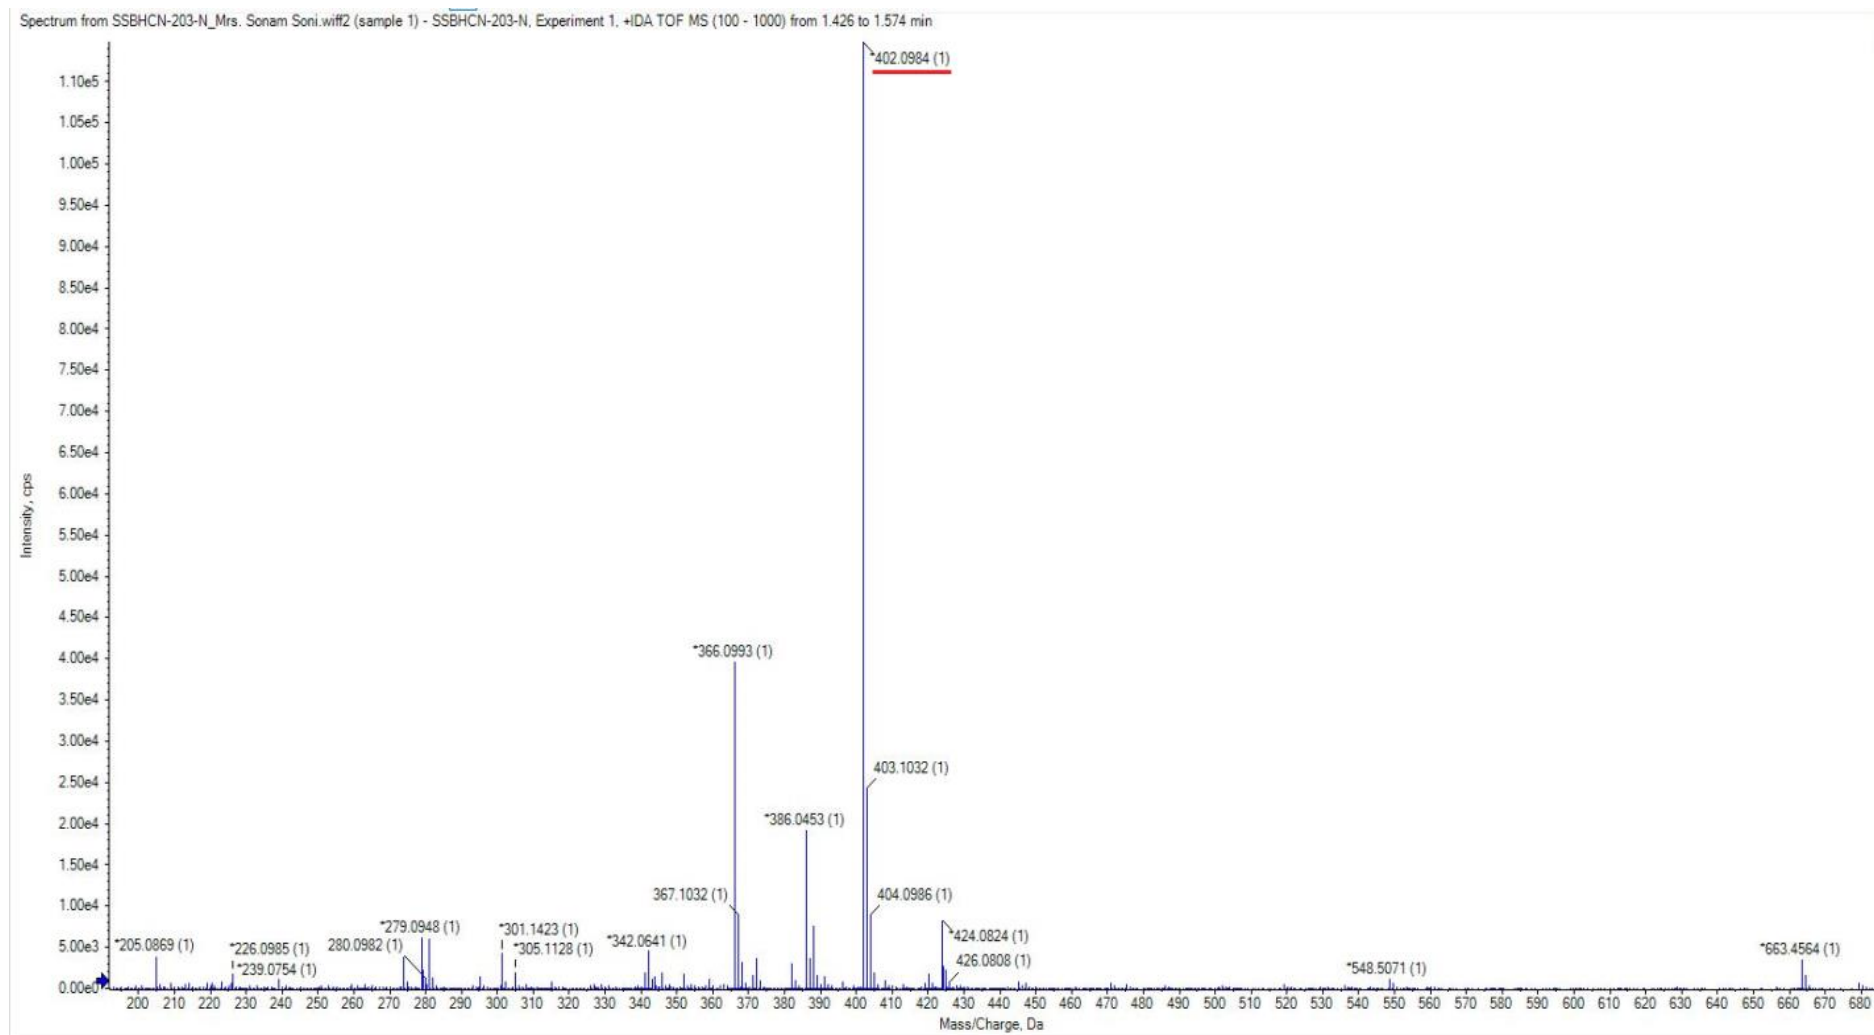



## HRMS Spectra of Compound 6r

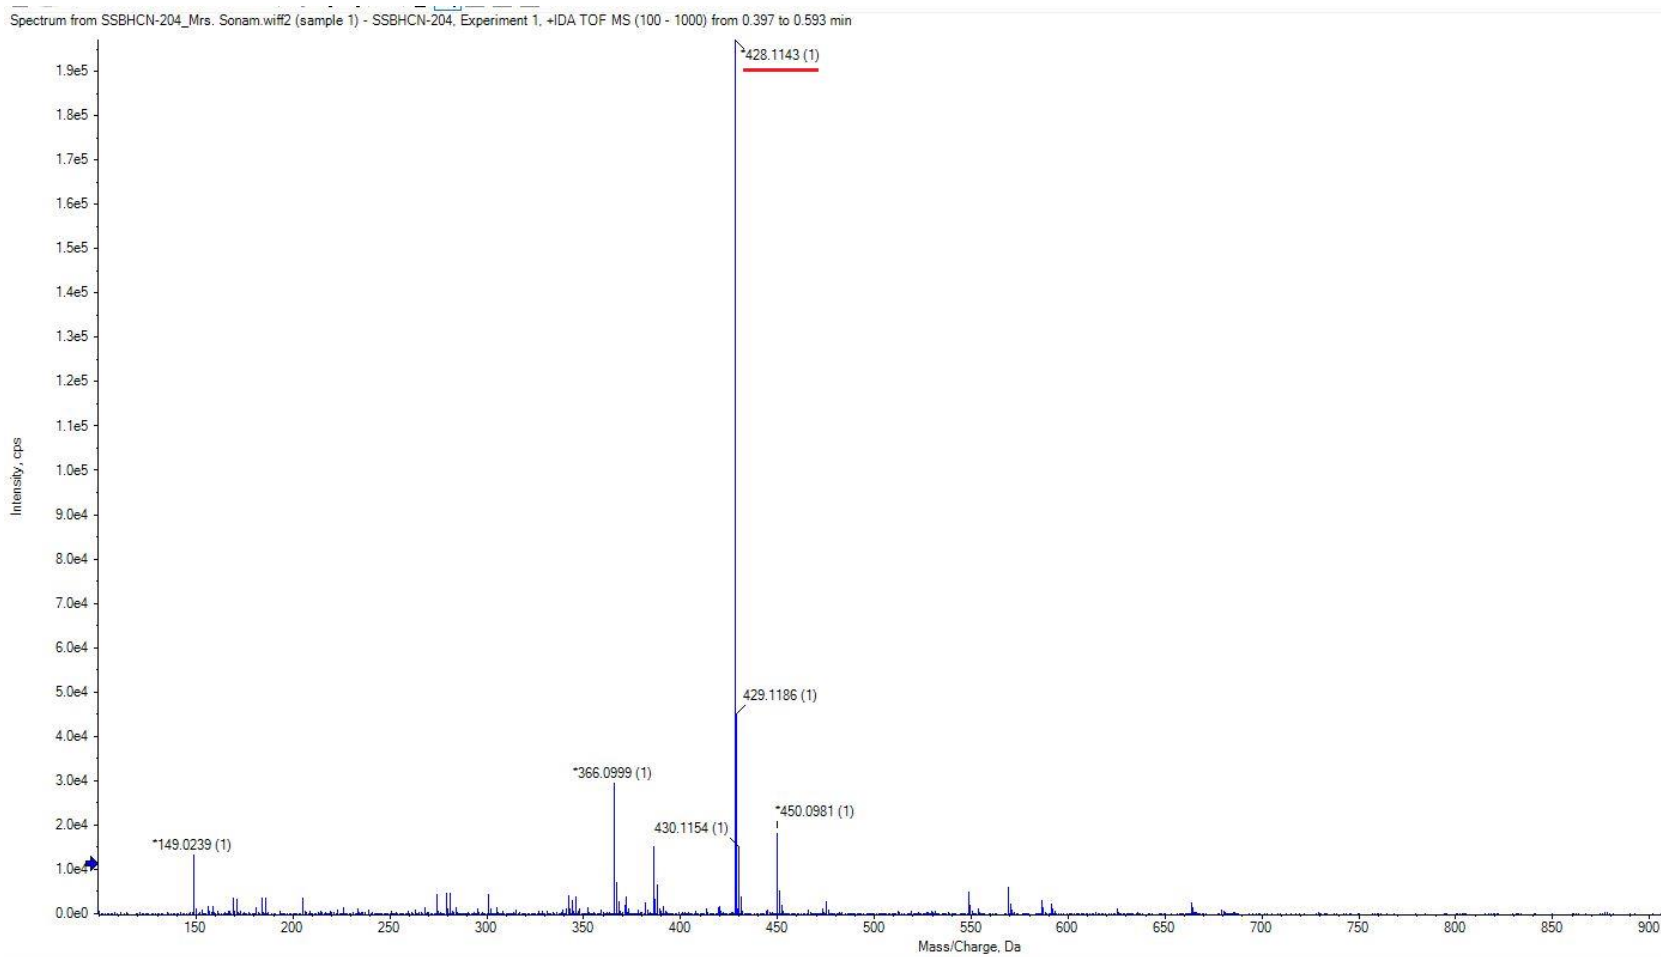

## HRMS Spectra of Compound 6s

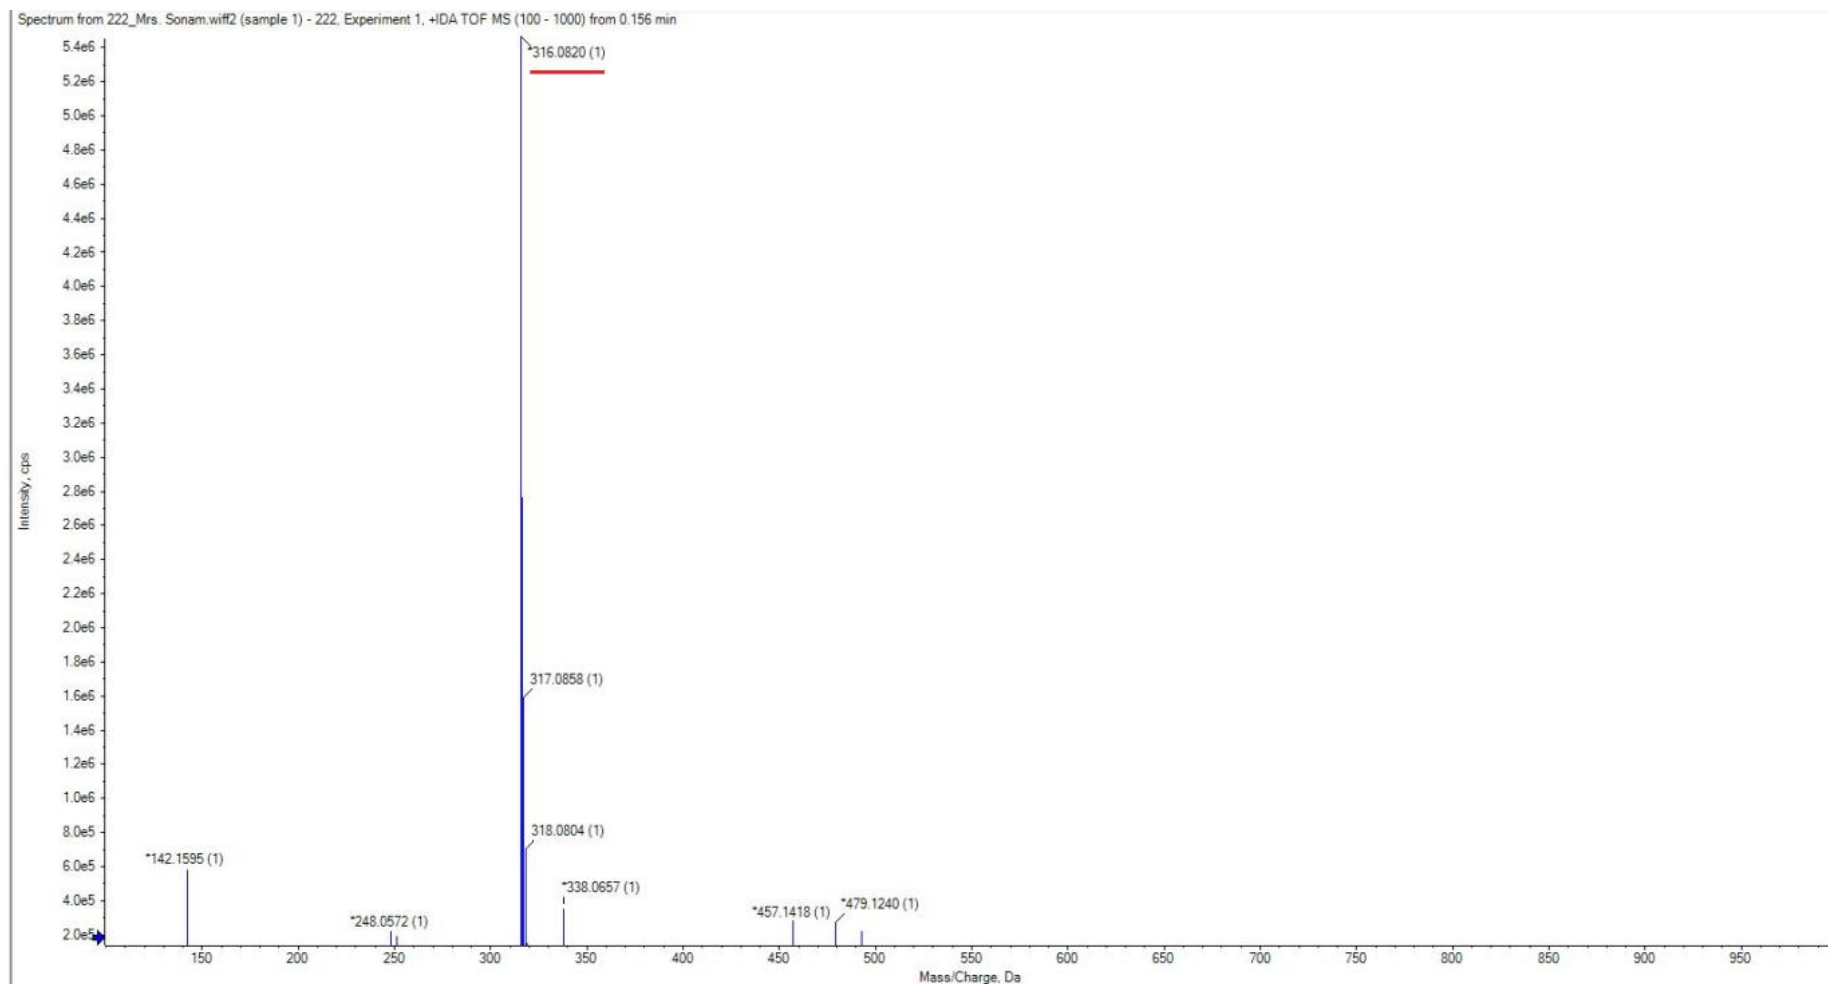

## HRMS Spectra of Compound 6t

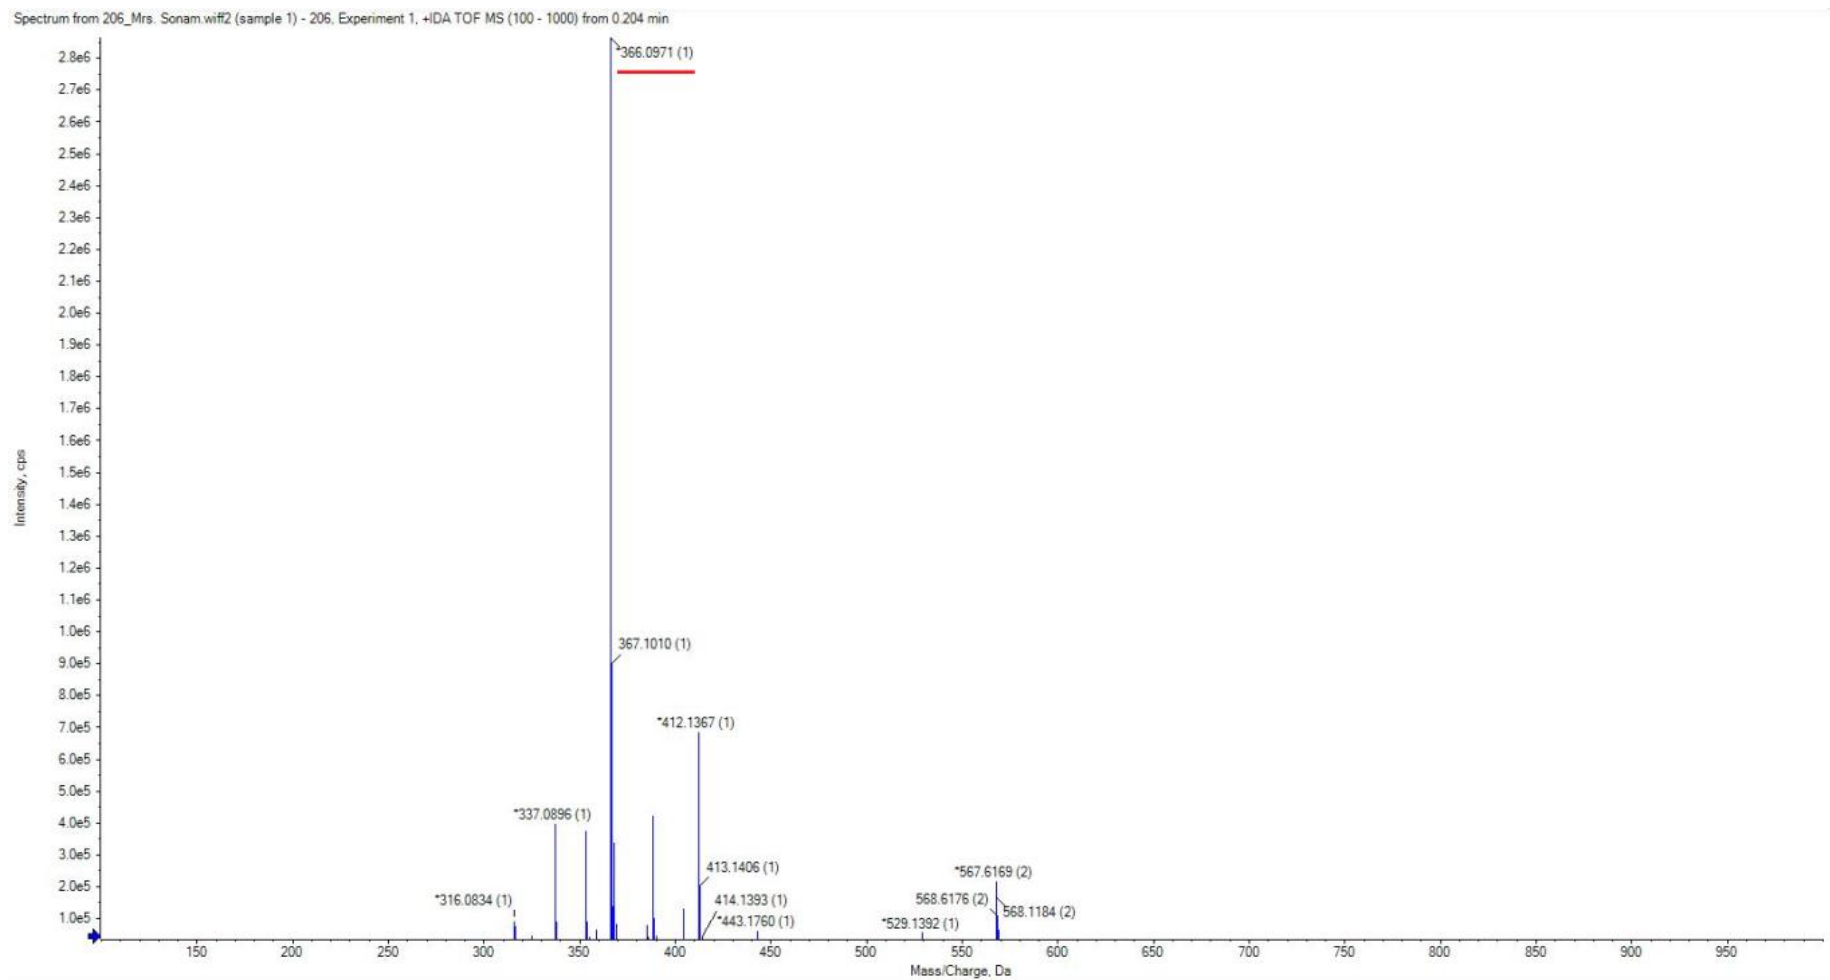

## HRMS Spectra of Compound 6u

Spectrum from SSBHCN-208\_Mrs. Sonam Soni.wiff2 (sample 1) - SSBHCN-208, Experiment 1, +IDA TOF MS (100 - 1000) from 0.647 to 0.843 min

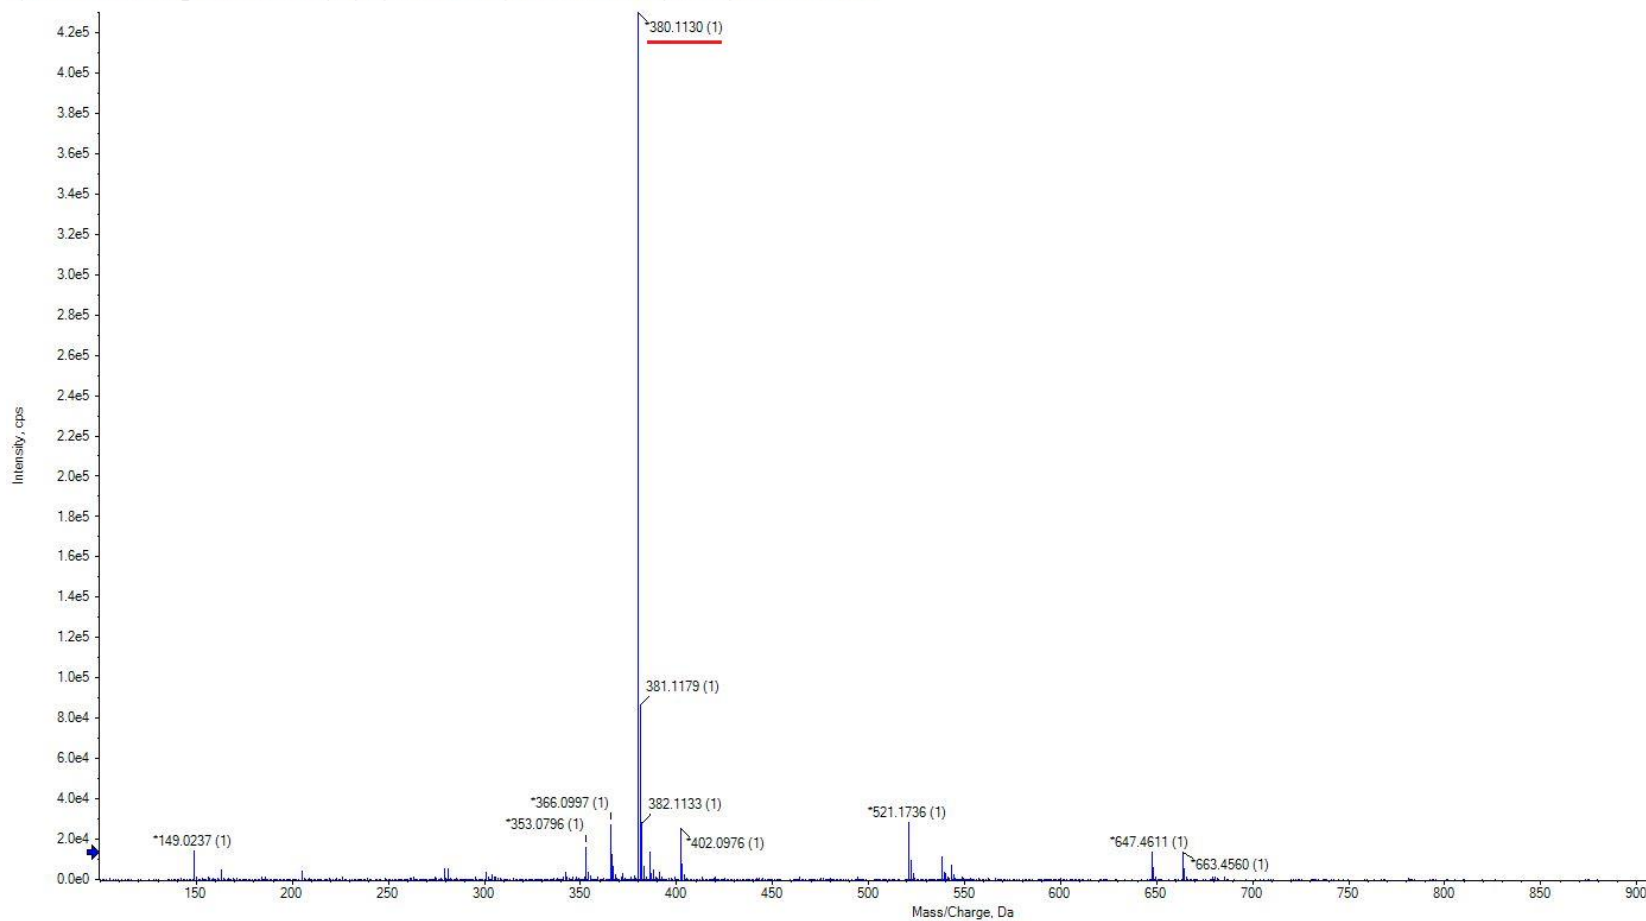

## HRMS Spectra of Compound 6v

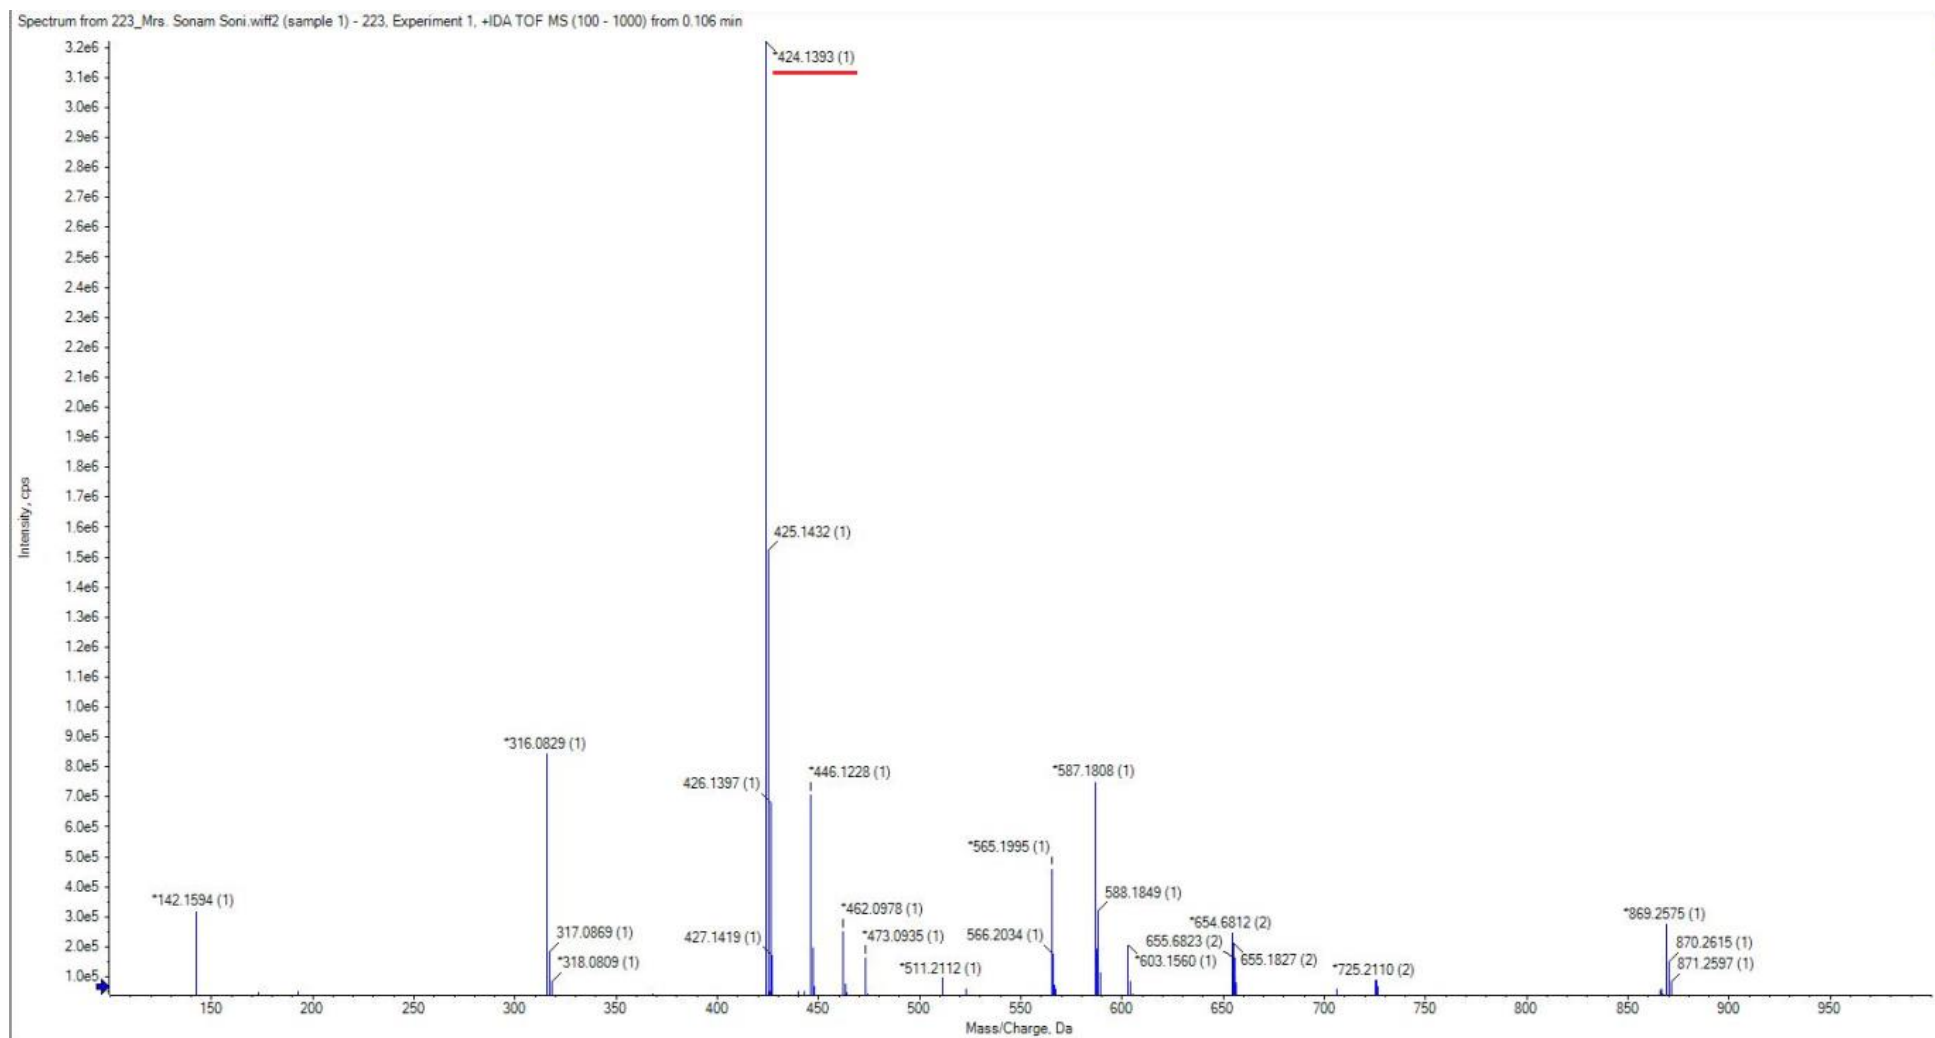

## HRMS Spectra of Compound 6w

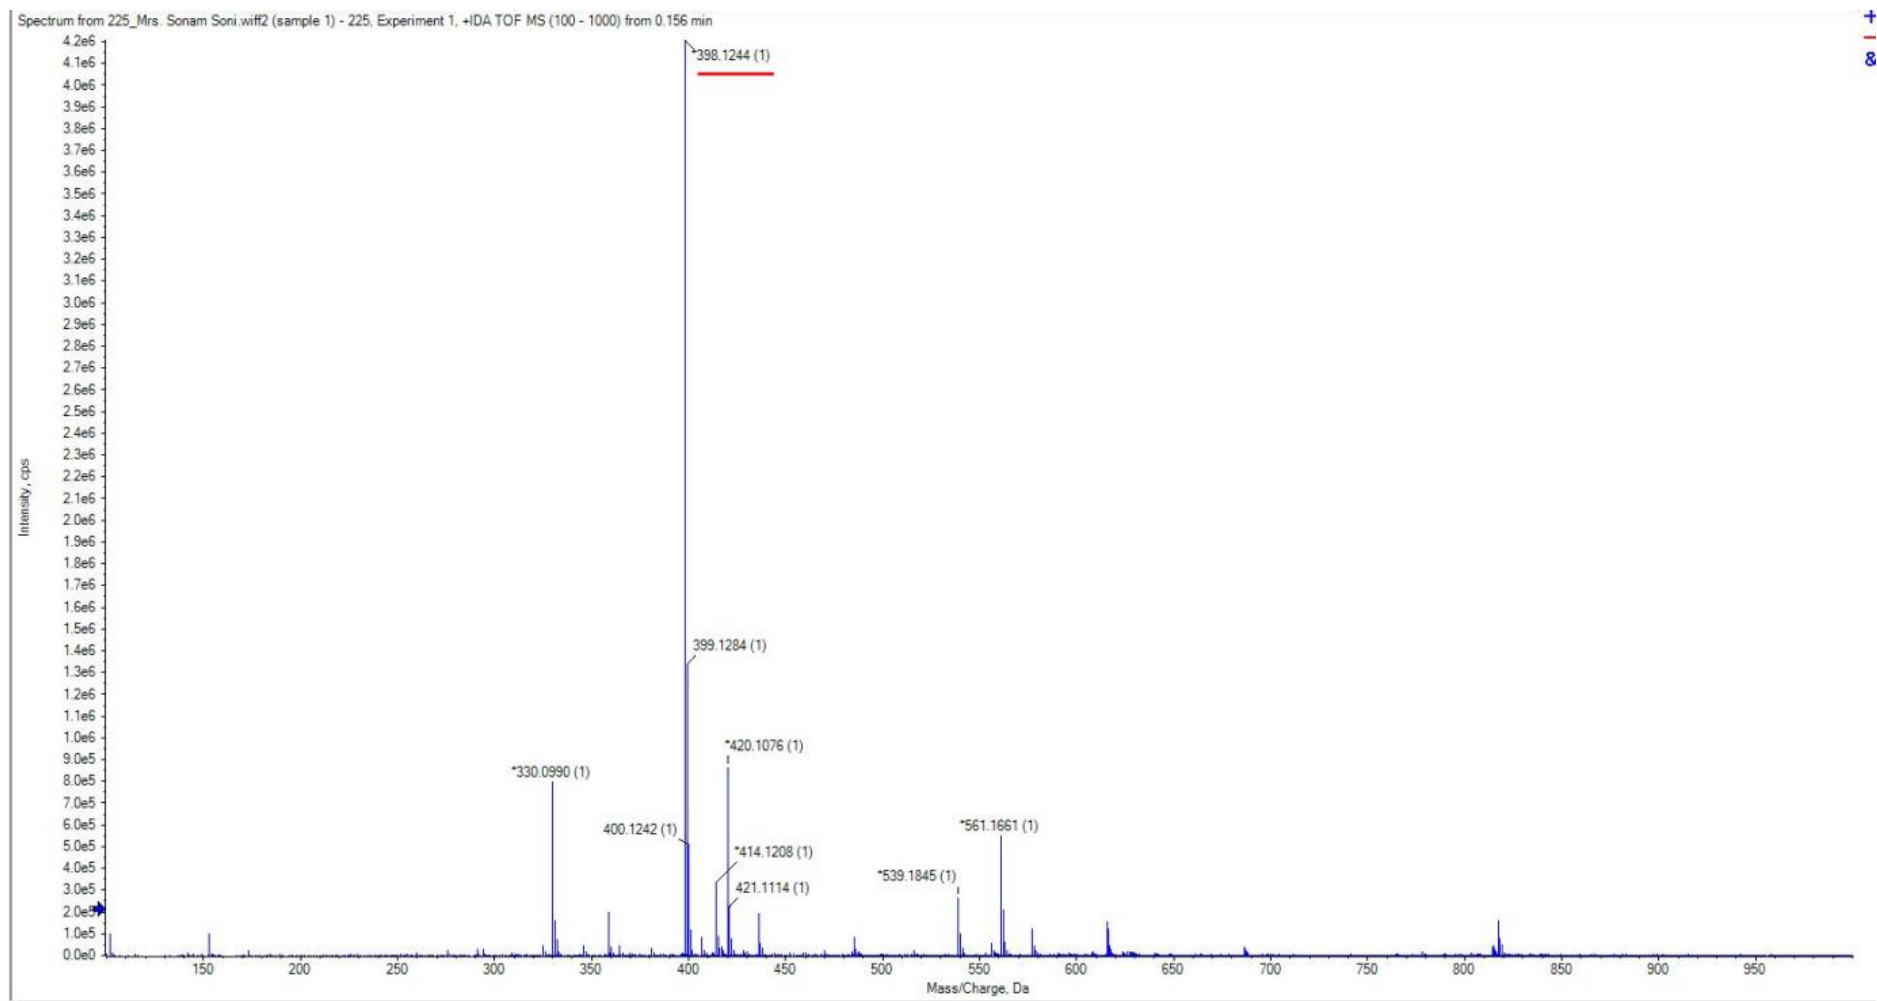

## HRMS Spectra of Compound 6x

Spectrum from SSBHCN-209R\_Mrs. Sonam.wiff2 (sample 1) - SSBHCN-209R, Experiment 1, +IDA TOF MS (100 - 1000) from 0.594 to 0.740 min

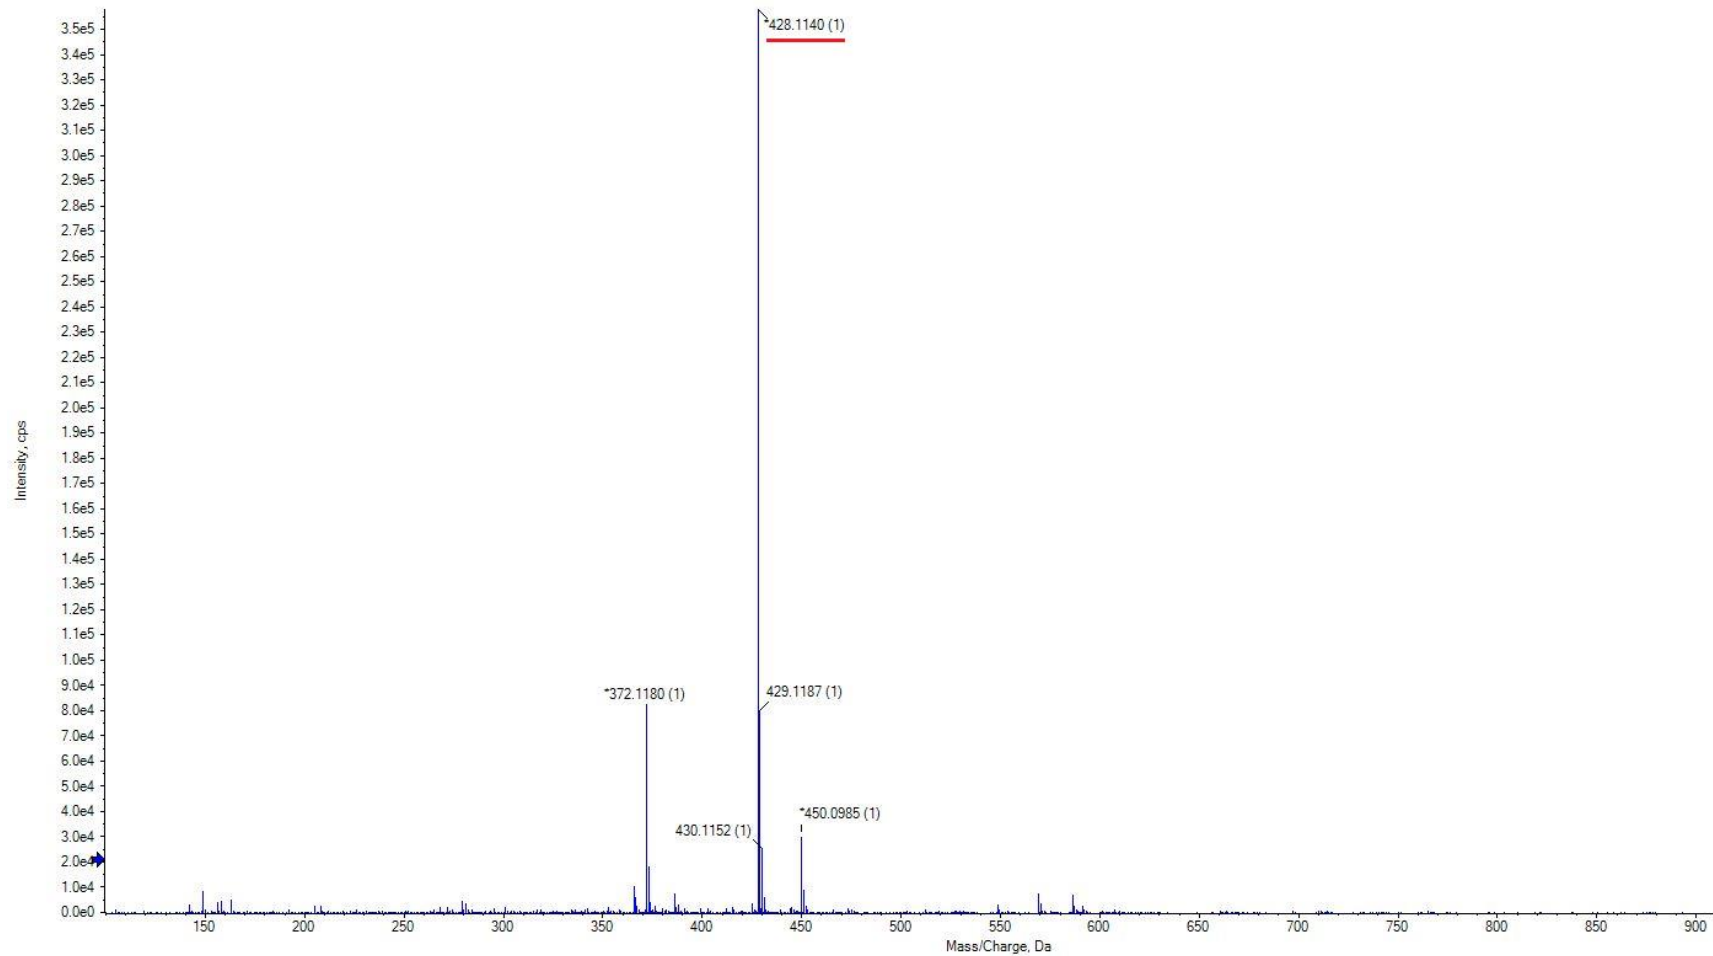

## HRMS Spectra of Compound 6y

Spectrum from Ph-Furan\_Mrs. Sonam Soni.wiff2 (sample 1) - Ph-Furan, Experiment 1, +IDA TOF MS (100 - 1000) from 0.106 min

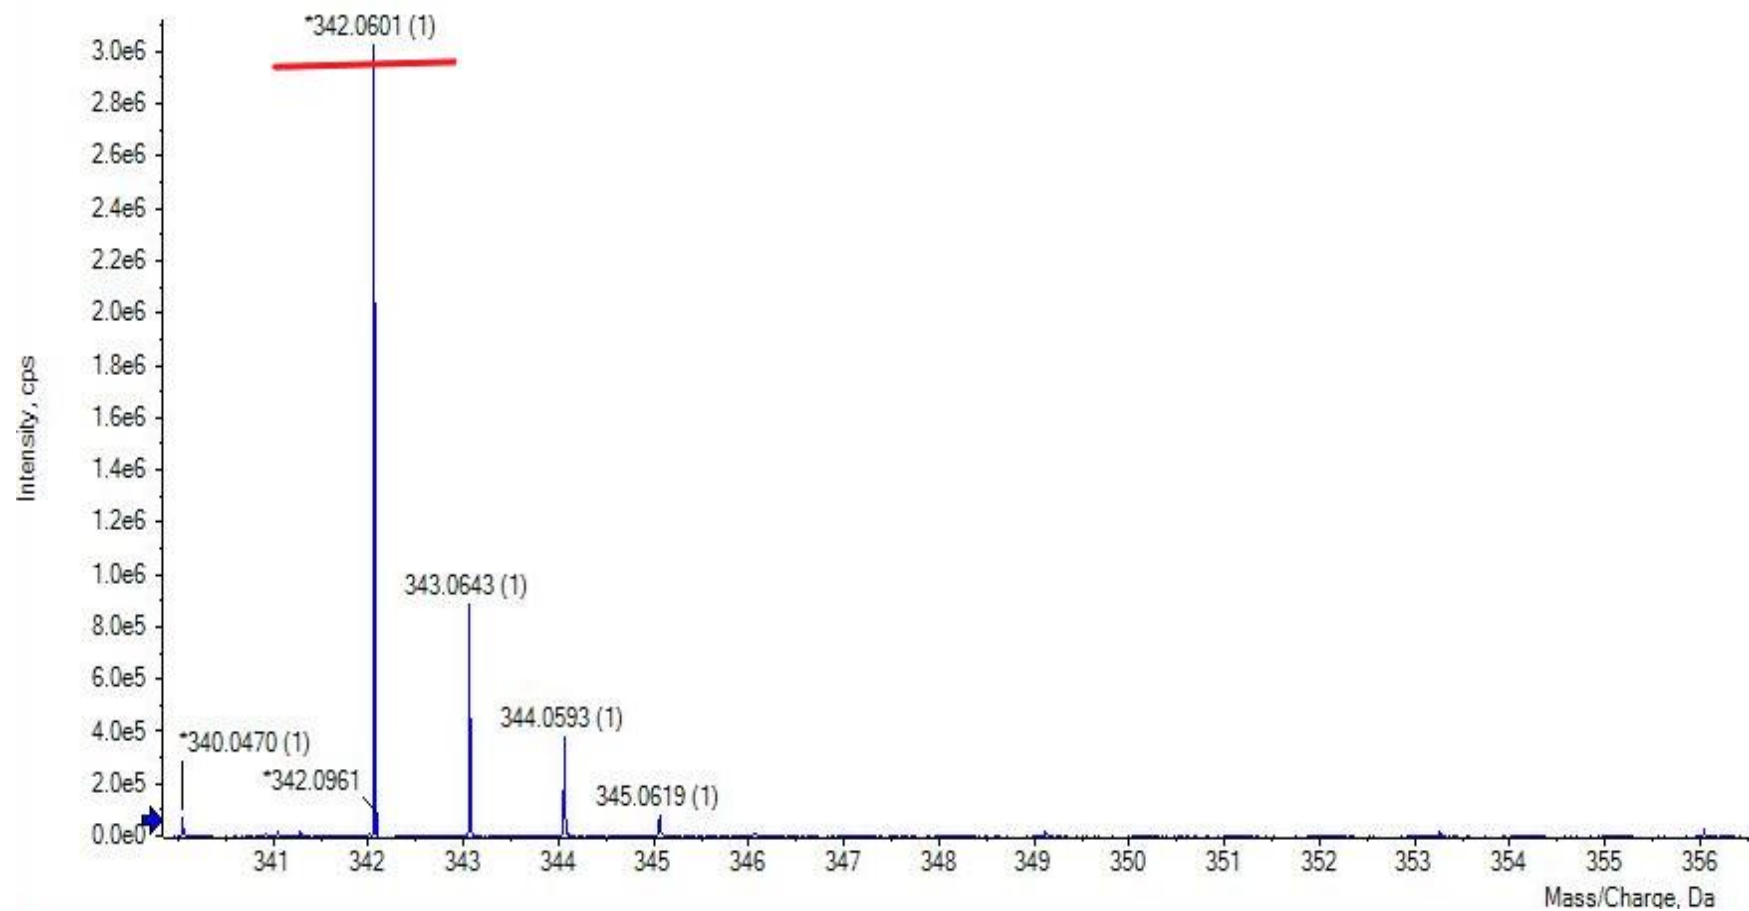



## HRMS Spectra of Compound 6z

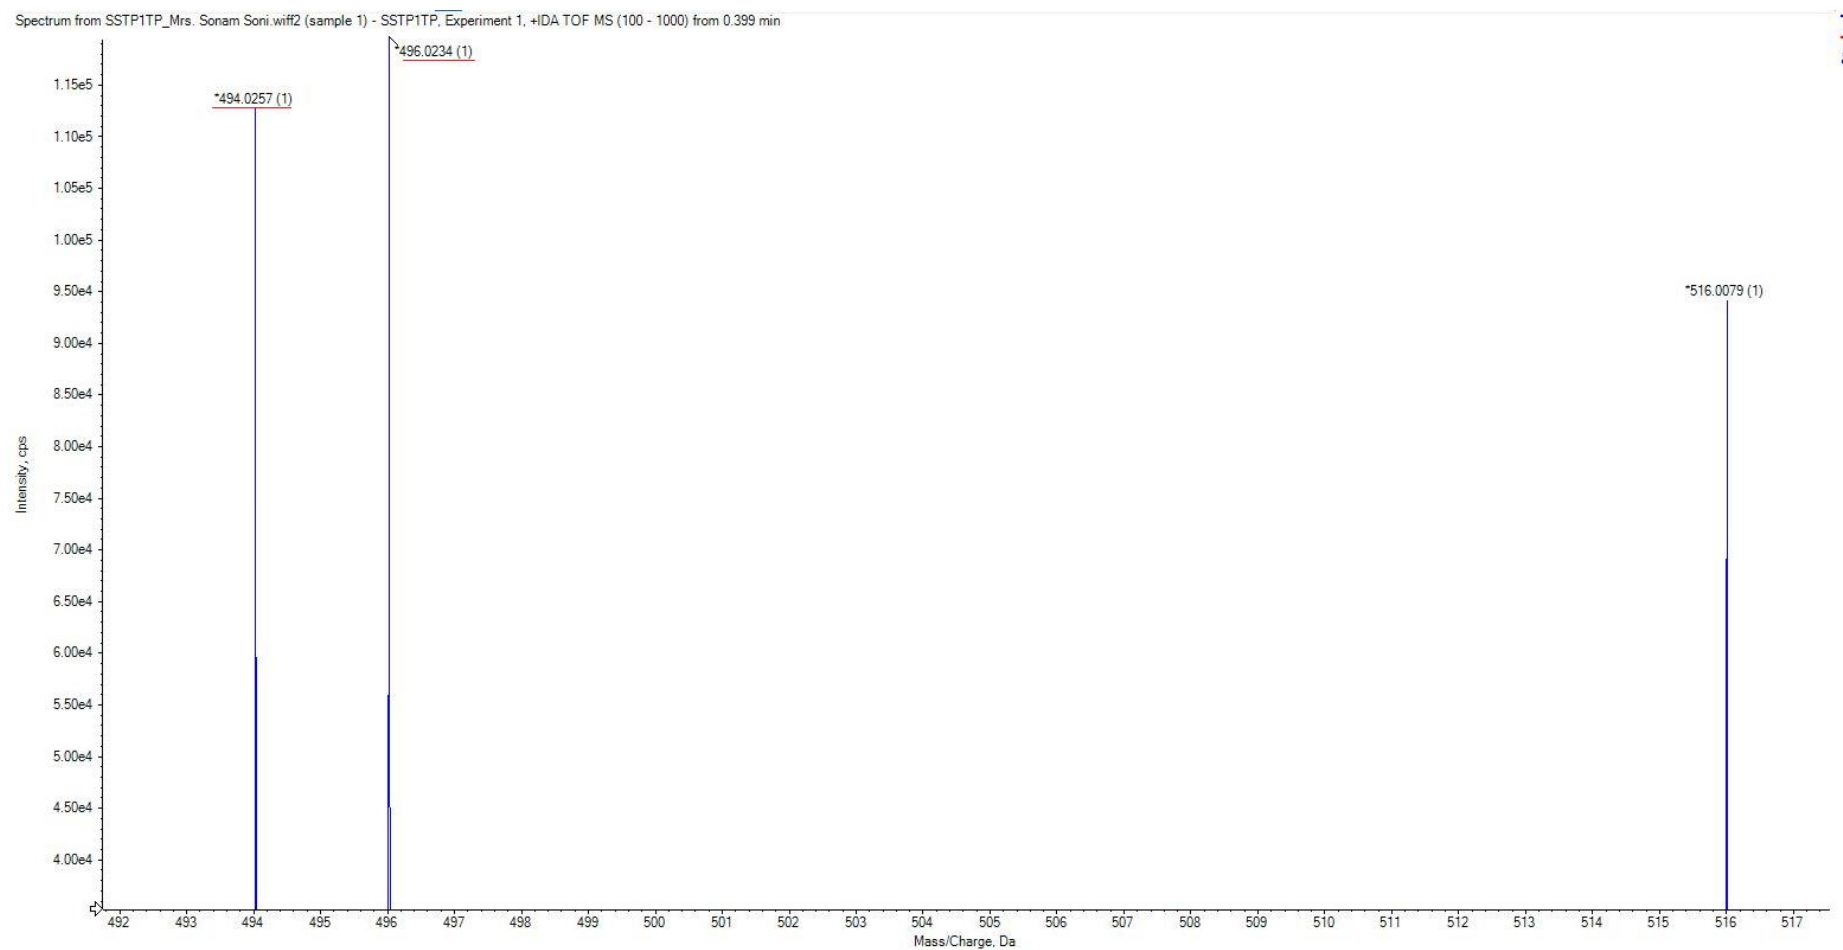

## HRMS Spectra of Compound 6ab

Spectrum from SSTP2TP\_Mrs. Sonam Soni.wiff2 (sample 1) - SSTP2TP, Experiment 1, +IDA TOF MS (100 - 1000) from 0.053 to 0.104 min

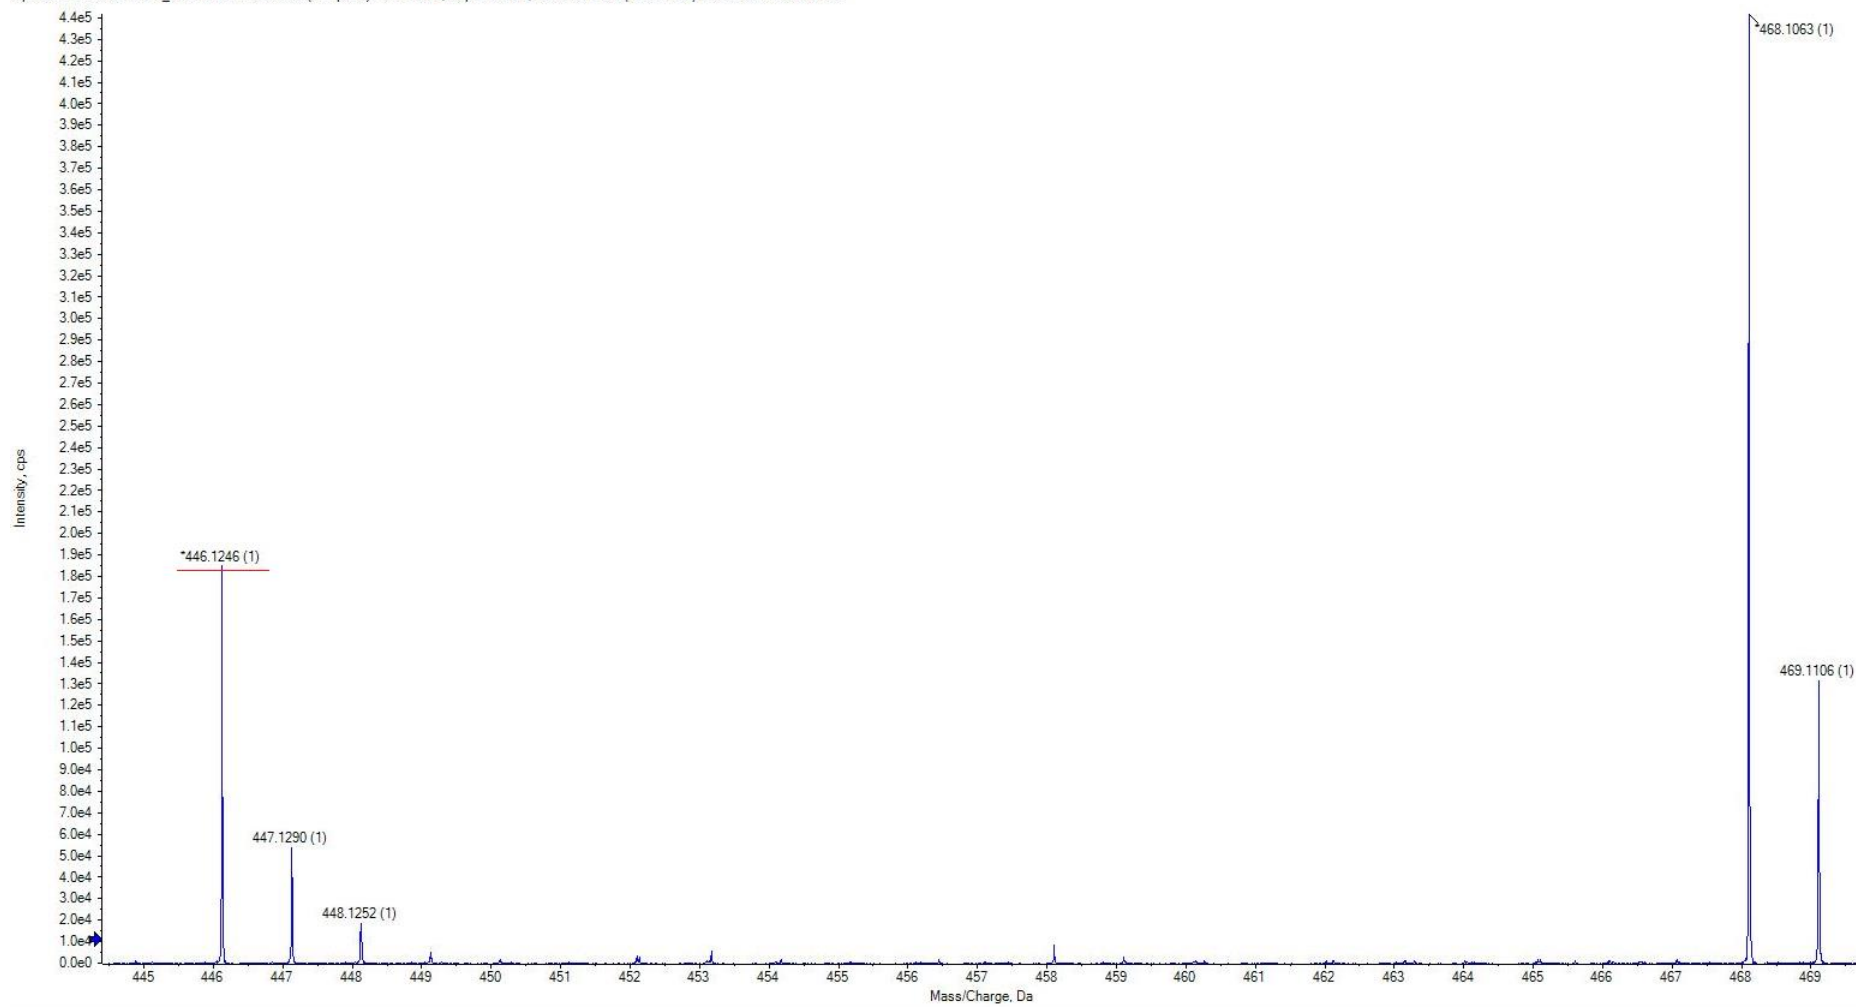

## Crystal Data<sup>1</sup> of 6i and 6l

### ORTEP Diagram of Compound 6i (CCDC 2096630)

Datablock 205\_auto - ellipsoid plot

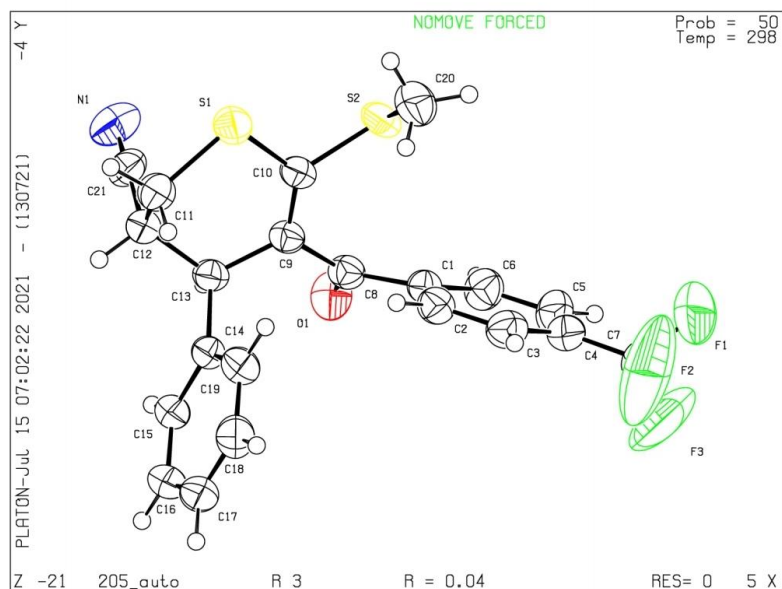

**Crystallization Details** For the crystallization of compound **6i**, vacuum dried pure sample of **6i** was taken in a vial and dissolved in 2 mL of acetonitrile. The vial was kept around 18-20 °C temperature for slow evaporation. After 5 days, we could find pale yellow needle shape crystal, which was picked up from the vial and performed single crystal XRD study.

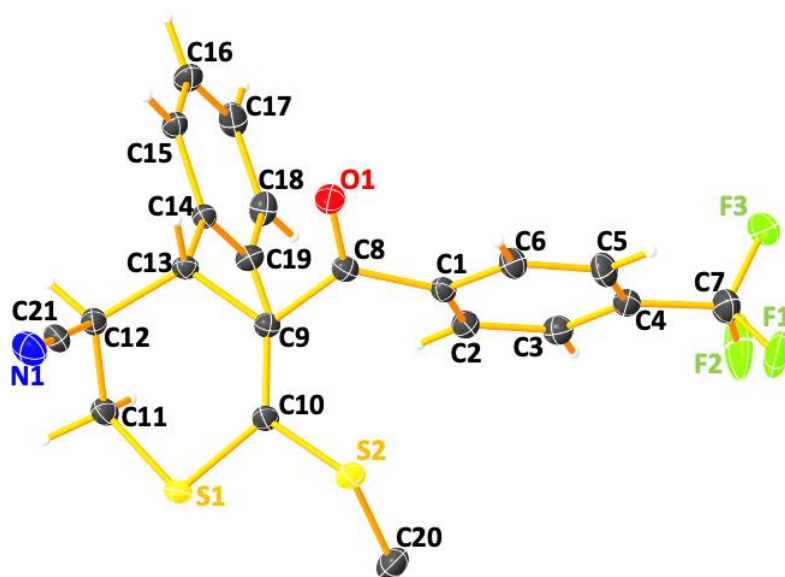

Figure S2: Thermal Ellipsoid Plot at 40% Probability Level

## 6i\_auto

Table S1 Crystal data and structure refinement for 6i\_auto.

|                                    |                                                                 |
|------------------------------------|-----------------------------------------------------------------|
| Identification code                | 6i_auto                                                         |
| Empirical formula                  | C <sub>21</sub> H <sub>13</sub> F <sub>3</sub> NOS <sub>2</sub> |
| Formula weight                     | 430.498                                                         |
| Temperature/K                      | N/A                                                             |
| Crystal system                     | trigonal                                                        |
| Space group                        | R3                                                              |
| a/Å                                | 29.2329(6)                                                      |
| b/Å                                | 29.2329(6)                                                      |
| c/Å                                | 6.01889(12)                                                     |
| α/°                                | 90                                                              |
| β/°                                | 90                                                              |
| γ/°                                | 120                                                             |
| Volume/Å <sup>3</sup>              | 4454.43(15)                                                     |
| Z                                  | 9                                                               |
| ρ <sub>calc</sub> /cm <sup>3</sup> | 1.444                                                           |
| μ/mm <sup>-1</sup>                 | 2.809                                                           |
| F(000)                             | 2001.6                                                          |
| Crystal size/mm <sup>3</sup>       | N/A × N/A × N/A                                                 |
| Radiation                          | Cu Kα (λ = 1.54184)                                             |
| 2θ range for data collection/°     | 6.04 to 136.12                                                  |
| Index ranges                       | -33 ≤ h ≤ 35, -30 ≤ k ≤ 34, -7 ≤ l ≤ 3                          |
| Reflections collected              | 4224                                                            |
| Independent reflections            | 2033 [R <sub>int</sub> = 0.0237, R <sub>sigma</sub> = 0.0257]   |

Data/restraints/parameters 2033/1/253  
 Goodness-of-fit on F<sup>2</sup> 0.888  
 Final R indexes [I>2σ (I)] R<sub>1</sub> = 0.0463, wR<sub>2</sub> = 0.1374  
 Final R indexes [all data] R<sub>1</sub> = 0.0468, wR<sub>2</sub> = 0.1387  
 Largest diff. peak/hole / e Å<sup>-3</sup> 0.27/-0.18  
 Flack parameter -0.00(2)

**Table S2 Fractional Atomic Coordinates (×10<sup>4</sup>) and Equivalent Isotropic Displacement Parameters (Å<sup>2</sup>×10<sup>3</sup>) for 6i\_auto. U<sub>eq</sub> is defined as 1/3 of the trace of the orthogonalised U<sub>ij</sub> tensor.**

| Atom | x            | y            | z            | U(eq)     |
|------|--------------|--------------|--------------|-----------|
| S1   | -4708.2 (4)  | -3806.0 (4)  | -2519.4 (19) | 56.3 (3)  |
| O1   | -5047.7 (14) | -5035.3 (14) | -8971 (5)    | 59.2 (8)  |
| C8   | -4899.2 (14) | -4960.2 (14) | -7034 (6)    | 42.2 (7)  |
| C13  | -5540.3 (13) | -4659.9 (14) | -6026 (6)    | 41.0 (7)  |
| C1   | -4657.9 (14) | -5270.4 (14) | -6126 (6)    | 42.1 (7)  |
| C12  | -5592.1 (15) | -4190.3 (15) | -5160 (7)    | 45.7 (8)  |
| C9   | -5004.4 (14) | -4609.5 (14) | -5602 (5)    | 39.0 (7)  |
| C11  | -5404.1 (17) | -4048.8 (17) | -2771 (7)    | 51.3 (9)  |
| C10  | -4634.4 (14) | -4240.7 (15) | -4250 (6)    | 43.0 (8)  |
| C14  | -5997.3 (14) | -5180.7 (14) | -5163 (6)    | 39.6 (7)  |
| C21  | -5300.6 (19) | -3729.8 (16) | -6653 (7)    | 52.5 (9)  |
| C7   | -4158 (2)    | -6350 (2)    | -4034 (11)   | 72.5 (13) |
| C2   | -4766.1 (15) | -5470.2 (16) | -3981 (7)    | 47.3 (8)  |
| N1   | -5085 (2)    | -3389.5 (17) | -7824 (8)    | 73.0 (12) |
| S2   | -3974.5 (3)  | -4100.5 (4)  | -4435 (2)    | 53.3 (3)  |
| C16  | -6876.2 (16) | -5915.5 (18) | -5698 (9)    | 58.4 (11) |
| C15  | -6450.5 (15) | -5453.6 (15) | -6460 (7)    | 48.3 (8)  |
| C17  | -6853.7 (17) | -6121.4 (17) | -3666 (10)   | 61.1 (11) |
| C19  | -5979.8 (16) | -5393.0 (17) | -3095 (6)    | 48.1 (8)  |
| C6   | -4373.8 (18) | -5407.3 (18) | -7558 (7)    | 52.6 (9)  |
| C3   | -4599.7 (18) | -5821.3 (17) | -3300 (7)    | 53.4 (9)  |
| C5   | -4207.2 (19) | -5751 (2)    | -6868 (8)    | 61.6 (11) |
| C20  | -3805 (2)    | -4143 (2)    | -1574 (9)    | 69.0 (13) |
| C4   | -4322.4 (17) | -5960.3 (17) | -4742 (8)    | 54.0 (10) |
| C18  | -6412.9 (18) | -5863.6 (19) | -2375 (8)    | 56.6 (10) |
| F1   | -3658 (2)    | -6168 (2)    | -4206 (11)   | 162 (3)   |
| F3   | -4361 (3)    | -6760.2 (19) | -5168 (11)   | 217 (5)   |
| F2   | -4244 (5)    | -6477 (4)    | -1975 (10)   | 218 (5)   |

**Table S3 Anisotropic Displacement Parameters (Å<sup>2</sup>×10<sup>3</sup>) for 6i\_auto. The Anisotropic displacement factor exponent takes the form: -2π<sup>2</sup>[h<sup>2</sup>a\*<sup>2</sup>U<sub>11</sub>+2hka\*b\*U<sub>12</sub>+...].**

| Atom | U <sub>11</sub> | U <sub>22</sub> | U <sub>33</sub> | U <sub>12</sub> | U <sub>13</sub> | U <sub>23</sub> |
|------|-----------------|-----------------|-----------------|-----------------|-----------------|-----------------|
|------|-----------------|-----------------|-----------------|-----------------|-----------------|-----------------|

**Table S3 Anisotropic Displacement Parameters ( $\text{\AA}^2 \times 10^3$ ) for 6i\_auto. The Anisotropic displacement factor exponent takes the form:  $-2\pi^2[h^2a^{*2}U_{11}+2hka^*b^*U_{12}+\dots]$ .**

| Atom | U <sub>11</sub> | U <sub>22</sub> | U <sub>33</sub> | U <sub>12</sub> | U <sub>13</sub> | U <sub>23</sub> |
|------|-----------------|-----------------|-----------------|-----------------|-----------------|-----------------|
| S1   | 48.8 (5)        | 53.7 (6)        | 67.1 (6)        | 26.1 (4)        | -15.1 (4)       | -24.6 (4)       |
| O1   | 73 (2)          | 77 (2)          | 40.9 (14)       | 46.9 (17)       | -7.0 (13)       | -9.8 (13)       |
| C8   | 37.1 (17)       | 41.3 (18)       | 44.1 (17)       | 16.5 (14)       | 3.8 (13)        | -0.8 (14)       |
| C13  | 34.9 (16)       | 36.6 (17)       | 45.5 (16)       | 13.3 (14)       | -1.9 (13)       | -3.6 (13)       |
| C1   | 36.9 (17)       | 38.0 (17)       | 49.5 (18)       | 17.2 (14)       | 0.2 (14)        | -5.1 (14)       |
| C12  | 37.8 (17)       | 38.7 (18)       | 58 (2)          | 17.6 (15)       | 0.5 (15)        | -1.4 (15)       |
| C9   | 34.9 (16)       | 38.5 (17)       | 39.7 (16)       | 15.4 (14)       | 2.4 (13)        | 0.6 (13)        |
| C11  | 49 (2)          | 51 (2)          | 56 (2)          | 25.9 (18)       | 0.4 (16)        | -10.5 (17)      |
| C10  | 32.2 (15)       | 38.1 (17)       | 53 (2)          | 13.0 (14)       | -0.2 (14)       | -2.7 (14)       |
| C14  | 35.6 (16)       | 38.4 (17)       | 44.4 (16)       | 18.3 (14)       | -1.8 (13)       | -4.0 (13)       |
| C21  | 62 (2)          | 41 (2)          | 59 (2)          | 28.8 (18)       | -6.0 (18)       | -7.2 (18)       |
| C7   | 75 (3)          | 54 (3)          | 95 (4)          | 38 (2)          | -14 (3)         | -1 (2)          |
| C2   | 42.4 (19)       | 47.1 (19)       | 50.6 (19)       | 21.0 (17)       | 2.8 (15)        | 0.3 (15)        |
| N1   | 91 (3)          | 48 (2)          | 74 (3)          | 30 (2)          | -1 (2)          | 3 (2)           |
| S2   | 30.2 (4)        | 52.5 (5)        | 67.0 (6)        | 13.1 (4)        | -2.2 (4)        | -5.2 (4)        |
| C16  | 36.1 (19)       | 46 (2)          | 85 (3)          | 14.2 (17)       | -9 (2)          | -2 (2)          |
| C15  | 38.5 (18)       | 40.2 (19)       | 64 (2)          | 18.1 (15)       | -7.8 (16)       | -2.1 (16)       |
| C17  | 40 (2)          | 42 (2)          | 94 (3)          | 15.6 (17)       | 13 (2)          | 7 (2)           |
| C19  | 43.0 (19)       | 51 (2)          | 48.3 (19)       | 21.7 (16)       | -4.7 (15)       | -1.8 (16)       |
| C6   | 57 (2)          | 55 (2)          | 51.0 (19)       | 32 (2)          | 7.7 (17)        | -0.6 (17)       |
| C3   | 54 (2)          | 47 (2)          | 53 (2)          | 20.7 (17)       | 0.2 (17)        | 4.6 (17)        |
| C5   | 64 (3)          | 61 (3)          | 72 (3)          | 40 (2)          | 11 (2)          | -4 (2)          |
| C20  | 57 (3)          | 73 (3)          | 77 (3)          | 33 (2)          | -14 (2)         | 4 (2)           |
| C4   | 48 (2)          | 44 (2)          | 68 (3)          | 21.8 (17)       | -9.7 (17)       | -5.9 (17)       |
| C18  | 53 (2)          | 59 (2)          | 62 (2)          | 31 (2)          | 10.8 (19)       | 13.5 (19)       |
| F1   | 99 (3)          | 118 (4)         | 299 (10)        | 77 (3)          | -26 (5)         | 23 (5)          |
| F3   | 270 (9)         | 83 (3)          | 340 (11)        | 118 (5)         | -194 (9)        | -90 (5)         |
| F2   | 379 (13)        | 287 (10)        | 158 (6)         | 294 (11)        | 85 (7)          | 110 (7)         |

**Table S4 Bond Lengths for 6i\_auto.**

| Atom | Atom | Length/ $\text{\AA}$ | Atom | Atom | Length/ $\text{\AA}$ |
|------|------|----------------------|------|------|----------------------|
| S1   | C11  | 1.795 (4)            | C14  | C19  | 1.403 (5)            |
| S1   | C10  | 1.738 (4)            | C21  | N1   | 1.121 (6)            |
| O1   | C8   | 1.225 (5)            | C7   | C4   | 1.503 (7)            |
| C8   | C1   | 1.503 (5)            | C7   | F1   | 1.287 (8)            |
| C8   | C9   | 1.485 (5)            | C7   | F3   | 1.243 (7)            |
| C13  | C12  | 1.545 (5)            | C7   | F2   | 1.282 (8)            |
| C13  | C9   | 1.520 (5)            | C2   | C3   | 1.399 (6)            |
| C13  | C14  | 1.529 (5)            | S2   | C20  | 1.813 (5)            |
| C1   | C2   | 1.387 (6)            | C16  | C15  | 1.379 (6)            |

**Table S4 Bond Lengths for 6i\_auto.**

| Atom | Atom | Length/Å  | Atom | Atom | Length/Å  |
|------|------|-----------|------|------|-----------|
| C1   | C6   | 1.387 (5) | C16  | C17  | 1.379 (8) |
| C12  | C11  | 1.521 (6) | C17  | C18  | 1.364 (7) |
| C12  | C21  | 1.483 (6) | C19  | C18  | 1.393 (6) |
| C9   | C10  | 1.352 (5) | C6   | C5   | 1.382 (7) |
| C10  | S2   | 1.764 (4) | C3   | C4   | 1.380 (6) |
| C14  | C15  | 1.394 (5) | C5   | C4   | 1.385 (7) |

**Table S5 Bond Angles for 6i\_auto.**

| Atom | Atom | Atom | Angle/°     | Atom | Atom | Atom | Angle/°   |
|------|------|------|-------------|------|------|------|-----------|
| C10  | S1   | C11  | 100.99 (18) | C19  | C14  | C15  | 118.6 (3) |
| C1   | C8   | O1   | 118.0 (3)   | N1   | C21  | C12  | 178.3 (5) |
| C9   | C8   | O1   | 119.9 (4)   | F1   | C7   | C4   | 113.1 (5) |
| C9   | C8   | C1   | 121.8 (3)   | F3   | C7   | C4   | 113.4 (5) |
| C9   | C13  | C12  | 114.3 (3)   | F3   | C7   | F1   | 104.5 (7) |
| C14  | C13  | C12  | 110.2 (3)   | F2   | C7   | C4   | 113.8 (5) |
| C14  | C13  | C9   | 112.6 (3)   | F2   | C7   | F1   | 102.4 (7) |
| C2   | C1   | C8   | 121.0 (3)   | F2   | C7   | F3   | 108.8 (7) |
| C6   | C1   | C8   | 118.5 (4)   | C3   | C2   | C1   | 119.5 (4) |
| C6   | C1   | C2   | 120.0 (4)   | C20  | S2   | C10  | 103.2 (2) |
| C11  | C12  | C13  | 112.2 (3)   | C17  | C16  | C15  | 120.4 (4) |
| C21  | C12  | C13  | 109.6 (3)   | C16  | C15  | C14  | 120.5 (4) |
| C21  | C12  | C11  | 111.1 (3)   | C18  | C17  | C16  | 120.1 (4) |
| C13  | C9   | C8   | 113.3 (3)   | C18  | C19  | C14  | 119.8 (4) |
| C10  | C9   | C8   | 122.7 (3)   | C5   | C6   | C1   | 120.2 (4) |
| C10  | C9   | C13  | 123.6 (3)   | C4   | C3   | C2   | 120.2 (4) |
| C12  | C11  | S1   | 111.8 (3)   | C4   | C5   | C6   | 120.1 (4) |
| C9   | C10  | S1   | 127.0 (3)   | C3   | C4   | C7   | 120.2 (5) |
| S2   | C10  | S1   | 112.9 (2)   | C5   | C4   | C7   | 119.8 (5) |
| S2   | C10  | C9   | 119.6 (3)   | C5   | C4   | C3   | 120.0 (4) |
| C15  | C14  | C13  | 119.1 (3)   | C19  | C18  | C17  | 120.6 (4) |
| C19  | C14  | C13  | 122.3 (3)   |      |      |      |           |

**Table S6 Torsion Angles for 6i\_auto.**

| A  | B   | C   | D   | Angle/°    | A   | B   | C   | D   | Angle/°    |
|----|-----|-----|-----|------------|-----|-----|-----|-----|------------|
| S1 | C11 | C12 | C13 | 65.6 (3)   | C13 | C9  | C10 | S2  | -163.2 (3) |
| S1 | C11 | C12 | C21 | -57.5 (3)  | C13 | C14 | C15 | C16 | -177.9 (4) |
| S1 | C10 | C9  | C8  | 179.5 (3)  | C13 | C14 | C19 | C18 | 178.6 (4)  |
| S1 | C10 | C9  | C13 | 7.5 (4)    | C1  | C2  | C3  | C4  | 1.1 (5)    |
| O1 | C8  | C1  | C2  | -140.4 (4) | C1  | C6  | C5  | C4  | -0.1 (5)   |

**Table S6 Torsion Angles for 6i\_auto.**

| A  | B  | C   | D   | Angle/°    | A   | B   | C   | D   | Angle/°    |
|----|----|-----|-----|------------|-----|-----|-----|-----|------------|
| O1 | C8 | C1  | C6  | 32.1 (4)   | C14 | C15 | C16 | C17 | -1.8 (5)   |
| O1 | C8 | C9  | C13 | 37.7 (4)   | C14 | C19 | C18 | C17 | 0.2 (5)    |
| O1 | C8 | C9  | C10 | -135.1 (4) | C7  | C4  | C3  | C2  | -178.1 (4) |
| C8 | C1 | C2  | C3  | 170.6 (4)  | C7  | C4  | C5  | C6  | 177.6 (5)  |
| C8 | C1 | C6  | C5  | -171.2 (4) | C2  | C3  | C4  | C5  | 0.1 (5)    |
| C8 | C9 | C13 | C12 | -161.3 (3) | C16 | C17 | C18 | C19 | -0.5 (5)   |
| C8 | C9 | C13 | C14 | 71.9 (3)   | C6  | C5  | C4  | C3  | -0.6 (6)   |
| C8 | C9 | C10 | S2  | 8.9 (4)    |     |     |     |     |            |

**Table S7 Hydrogen Atom Coordinates ( $\text{\AA} \times 10^4$ ) and Isotropic Displacement Parameters ( $\text{\AA}^2 \times 10^3$ ) for 6i\_auto.**

| Atom | x            | y            | z          | U(eq)     |
|------|--------------|--------------|------------|-----------|
| H13  | -5581.9 (13) | -4665.0 (14) | -7643 (6)  | 49.2 (9)  |
| H12  | -5966.6 (15) | -4293.4 (15) | -5208 (7)  | 54.8 (9)  |
| H11a | -5595.1 (17) | -4359.2 (17) | -1842 (7)  | 61.6 (11) |
| H11b | -5481.9 (17) | -3781.5 (17) | -2244 (7)  | 61.6 (11) |
| H2   | -4947.8 (15) | -5371.5 (16) | -3003 (7)  | 56.8 (10) |
| H16  | -7180.2 (16) | -6089.2 (18) | -6559 (9)  | 70.0 (13) |
| H15  | -6465.8 (15) | -5323.1 (15) | -7850 (7)  | 58.0 (10) |
| H17  | -7139.6 (17) | -6436.5 (17) | -3174 (10) | 73.3 (13) |
| H19  | -5680.3 (16) | -5220.1 (17) | -2208 (6)  | 57.7 (10) |
| H6   | -4295.3 (18) | -5267.2 (18) | -8985 (7)  | 63.1 (11) |
| H3   | -4676.1 (18) | -5961.3 (17) | -1872 (7)  | 64.0 (11) |
| H5   | -4017.3 (19) | -5842 (2)    | -7834 (8)  | 73.9 (13) |
| H18  | -6401.3 (18) | -6003.3 (19) | -1002 (8)  | 68.0 (12) |



## ORTEP Diagram of Compound 6l (CCDC 2099427)

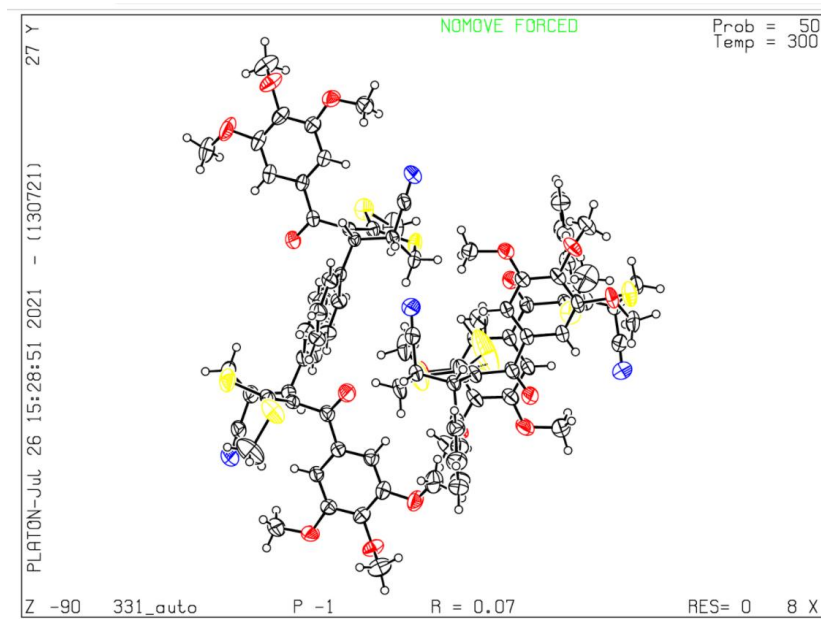

**Crystallization Details** For the crystallization of compound **6l**, vacuum dried pure sample of **6l** was taken in a vial and dissolved in 2 mL of acetonitrile. The vial was kept around 18-20 °C temperature for slow evaporation. After 4 days, we could find pink cube shape crystal, which was picked up from the vial and performed single crystal XRD study.

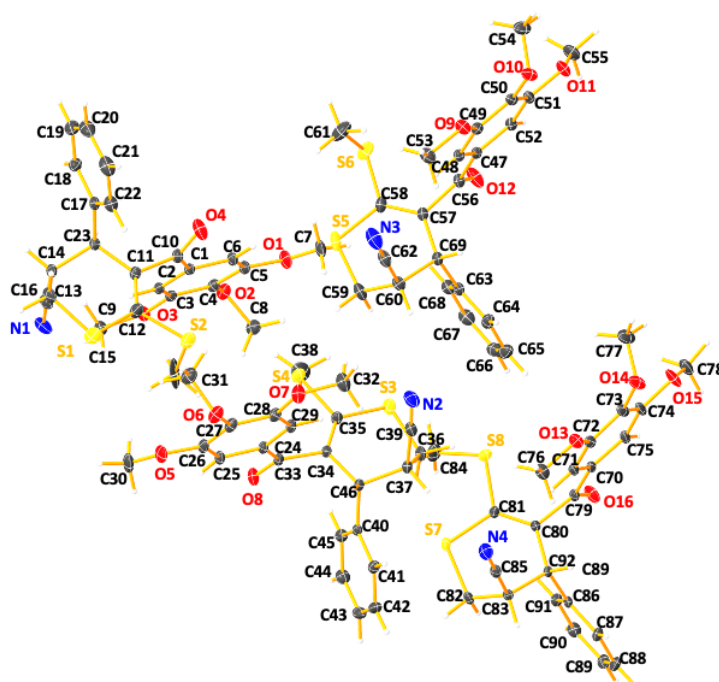

**Figure S3: Thermal Ellipsoid Plot at 40% Probability Level**

# 6l\_auto

**Table S8 Crystal data and structure refinement for 6l\_auto.**

|                                             |                                                                               |
|---------------------------------------------|-------------------------------------------------------------------------------|
| Identification code                         | 6l_auto                                                                       |
| Empirical formula                           | C <sub>92</sub> H <sub>92</sub> N <sub>4</sub> O <sub>16</sub> S <sub>8</sub> |
| Formula weight                              | 1766.302                                                                      |
| Temperature/K                               | 300(2)                                                                        |
| Crystal system                              | triclinic                                                                     |
| Space group                                 | P-1                                                                           |
| a/Å                                         | 14.9969(2)                                                                    |
| b/Å                                         | 15.45226(17)                                                                  |
| c/Å                                         | 19.0015(2)                                                                    |
| α/°                                         | 88.0358(9)                                                                    |
| β/°                                         | 84.5699(10)                                                                   |
| γ/°                                         | 88.8661(10)                                                                   |
| Volume/Å <sup>3</sup>                       | 4380.40(9)                                                                    |
| Z                                           | 2                                                                             |
| ρ <sub>calc</sub> /g/cm <sup>3</sup>        | 1.339                                                                         |
| μ/mm <sup>-1</sup>                          | 2.450                                                                         |
| F(000)                                      | 1866.8                                                                        |
| Crystal size/mm <sup>3</sup>                | 0.212 × 0.201 × 0.198                                                         |
| Radiation                                   | Cu Kα (λ = 1.54184)                                                           |
| 2θ range for data collection/°              | 5.72 to 136.12                                                                |
| Index ranges                                | -18 ≤ h ≤ 18, -18 ≤ k ≤ 18, -22 ≤ l ≤ 15                                      |
| Reflections collected                       | 46312                                                                         |
| Independent reflections                     | 15812 [R <sub>int</sub> = 0.0386, R <sub>sigma</sub> = 0.0362]                |
| Data/restraints/parameters                  | 15812/0/1097                                                                  |
| Goodness-of-fit on F <sup>2</sup>           | 1.040                                                                         |
| Final R indexes [I ≥ 2σ (I)]                | R <sub>1</sub> = 0.0770, wR <sub>2</sub> = 0.1954                             |
| Final R indexes [all data]                  | R <sub>1</sub> = 0.0880, wR <sub>2</sub> = 0.2030                             |
| Largest diff. peak/hole / e Å <sup>-3</sup> | 1.45/-1.53                                                                    |

**Table S9 Fractional Atomic Coordinates (×10<sup>4</sup>) and Equivalent Isotropic Displacement Parameters (Å<sup>2</sup>×10<sup>3</sup>) for 6l\_auto. U<sub>eq</sub> is defined as 1/3 of of the trace of the orthogonalised U<sub>ij</sub> tensor.**

| Atom | x            | y            | z           | U(eq)     |
|------|--------------|--------------|-------------|-----------|
| O9   | 13674.7 (17) | 4897.8 (17)  | 1362.9 (15) | 50.4 (6)  |
| O3   | 9622 (2)     | -2756.2 (16) | 3591.5 (18) | 65.2 (8)  |
| O10  | 13806.5 (19) | 6535 (2)     | 971.1 (16)  | 61.7 (8)  |
| C70  | 11307 (2)    | 5585.2 (19)  | 1678.7 (16) | 33.3 (7)  |
| C90  | 10342 (2)    | 4013.1 (18)  | 2805.0 (15) | 27.0 (6)  |
| O11  | 12392 (2)    | 7631.1 (18)  | 1069 (2)    | 74.8 (10) |
| C28  | 2848 (2)     | 4536 (2)     | 3616.9 (17) | 37.1 (7)  |
| C71  | 12050 (2)    | 5034 (2)     | 1644.7 (16) | 34.9 (7)  |

**Table S9 Fractional Atomic Coordinates ( $\times 10^4$ ) and Equivalent Isotropic Displacement Parameters ( $\text{\AA}^2 \times 10^3$ ) for 6l\_auto.  $U_{\text{eq}}$  is defined as 1/3 of of the trace of the orthogonalised  $U_{ij}$  tensor.**

| Atom | <i>x</i>    | <i>y</i>    | <i>z</i>    | $U(\text{eq})$ |
|------|-------------|-------------|-------------|----------------|
| C29  | 3686 (2)    | 4885 (2)    | 3419.2 (17) | 36.0 (7)       |
| C79  | 10386 (2)   | 5265.4 (19) | 1899.5 (17) | 35.1 (7)       |
| C83  | 10512 (2)   | 3022.1 (18) | 2865.0 (16) | 32.3 (6)       |
| C24  | 4440 (2)    | 4334 (2)    | 3380.5 (16) | 34.0 (7)       |
| C27  | 2764 (2)    | 3652 (2)    | 3777.5 (17) | 39.6 (7)       |
| C2   | 8625 (2)    | -1547 (2)   | 3914.3 (18) | 40.1 (8)       |
| C72  | 12891 (2)   | 5366 (2)    | 1418.9 (17) | 38.9 (7)       |
| C81  | 10018 (2)   | 3808.2 (19) | 1536.6 (16) | 33.7 (7)       |
| C80  | 10238 (2)   | 4310.5 (18) | 2049.9 (15) | 29.2 (6)       |
| C74  | 12227 (3)   | 6788 (2)    | 1265 (2)    | 47.4 (9)       |
| C17  | 6720 (2)    | 819 (2)     | 5582.3 (18) | 37.3 (7)       |
| C3   | 9466 (3)    | -1914 (2)   | 3763.1 (19) | 43.0 (8)       |
| C25  | 4356 (2)    | 3453 (2)    | 3538.6 (18) | 39.3 (7)       |
| O4   | 7017 (2)    | -823.7 (19) | 4459 (2)    | 77.5 (10)      |
| C75  | 11390 (3)   | 6466 (2)    | 1500.1 (18) | 40.9 (8)       |
| C10  | 7626 (2)    | -332 (2)    | 4285.9 (19) | 41.6 (8)       |
| C46  | 5383 (2)    | 5851 (2)    | 2205.3 (18) | 37.4 (7)       |
| C1   | 8543 (2)    | -669.4 (19) | 4071.8 (16) | 34.9 (7)       |
| C73  | 12974 (3)   | 6237 (2)    | 1211.8 (19) | 44.9 (8)       |
| C45  | 5959 (3)    | 5468 (3)    | 974 (2)     | 54.6 (10)      |
| C26  | 3521 (2)    | 3109 (2)    | 3737.4 (18) | 41.5 (8)       |
| C41  | 7024 (3)    | 5478 (2)    | 1832 (2)    | 49.8 (9)       |
| C40  | 6147 (2)    | 5579 (2)    | 1665.9 (19) | 39.9 (7)       |
| C76  | 13648 (3)   | 3998 (3)    | 1555 (2)    | 55.8 (10)      |
| C18  | 5849 (3)    | 797 (3)     | 5396 (2)    | 52.9 (9)       |
| C22  | 6859 (3)    | 700 (2)     | 6287.9 (19) | 48.1 (9)       |
| C77  | 13909 (3)   | 6801 (4)    | 239 (3)     | 75.5 (14)      |
| C42  | 7702 (3)    | 5282 (3)    | 1311 (3)    | 64.2 (12)      |
| C19  | 5145 (3)    | 672 (3)     | 5914 (3)    | 71.8 (14)      |
| C44  | 6643 (4)    | 5281 (3)    | 460 (2)     | 68.7 (13)      |
| C43  | 7506 (4)    | 5193 (3)    | 623 (3)     | 71.5 (14)      |
| C20  | 5300 (4)    | 571 (3)     | 6610 (3)    | 75.3 (15)      |
| C9   | 8883 (3)    | -3260 (3)   | 3442 (3)    | 70.0 (13)      |
| C21  | 6156 (3)    | 576 (3)     | 6796 (2)    | 67.3 (12)      |
| C78  | 11663 (4)   | 8187 (3)    | 954 (3)     | 72.7 (14)      |
| S1   | 6946.9 (11) | 2178.0 (8)  | 3704.3 (7)  | 82.7 (4)       |
| C92  | 11390 (2)   | 2800 (2)    | 2494.5 (18) | 40.1 (8)       |
| O5   | 4368.7 (18) | -3.2 (19)   | 1189.4 (17) | 60.3 (7)       |
| O8   | 8345.6 (18) | 478.5 (17)  | 602.7 (16)  | 55.8 (7)       |
| C89  | 8688 (2)    | 4347 (2)    | 3159.1 (18) | 38.1 (7)       |
| O13  | 2063.5 (16) | 4998.2 (17) | 3682.6 (15) | 51.4 (6)       |

**Table S9 Fractional Atomic Coordinates ( $\times 10^4$ ) and Equivalent Isotropic Displacement Parameters ( $\text{\AA}^2 \times 10^3$ ) for 6l\_auto.  $U_{\text{eq}}$  is defined as 1/3 of of the trace of the orthogonalised  $U_{ij}$  tensor.**

| Atom | <i>x</i>    | <i>y</i>    | <i>z</i>     | $U(\text{eq})$ |
|------|-------------|-------------|--------------|----------------|
| C63  | 8166 (2)    | -705.2 (19) | -927.7 (16)  | 32.4 (6)       |
| O6   | 4352.3 (19) | 1648.3 (19) | 1488.6 (15)  | 60.0 (7)       |
| C34  | 5518 (2)    | 5596 (2)    | 2964.3 (18)  | 35.9 (7)       |
| C51  | 5950 (3)    | 1727 (2)    | 1237.7 (19)  | 45.4 (8)       |
| C68  | 9059 (2)    | -637 (2)    | -830.2 (19)  | 43.0 (8)       |
| O15  | 3367.7 (19) | 2254.0 (16) | 3888.1 (17)  | 58.3 (7)       |
| C82  | 9774 (2)    | 2524 (2)    | 2571.3 (18)  | 39.9 (7)       |
| C14  | 7704 (2)    | 1987 (2)    | 4989.5 (19)  | 42.7 (8)       |
| C65  | 8507 (3)    | -290 (2)    | -2155.0 (19) | 53.0 (10)      |
| C37  | 5198 (2)    | 6838 (2)    | 2113 (2)     | 47.3 (9)       |
| C85  | 9729 (2)    | 4391 (2)    | 4029.5 (17)  | 39.6 (7)       |
| C87  | 8173 (3)    | 4662 (2)    | 4354 (2)     | 50.2 (9)       |
| N4   | 12053 (2)   | 2640 (2)    | 2187 (2)     | 58.8 (9)       |
| O14  | 1920.7 (17) | 3330.4 (18) | 3948.8 (14)  | 52.7 (7)       |
| C62  | 6426 (3)    | -2192 (2)   | 11 (2)       | 48.3 (9)       |
| C58  | 7238 (2)    | -1964 (2)   | -448.1 (18)  | 37.5 (7)       |
| C69  | 7660 (2)    | 60 (2)      | 621.7 (16)   | 35.7 (7)       |
| C50  | 5162 (2)    | 1261 (2)    | 1284.4 (18)  | 44.6 (8)       |
| C6   | 9294 (2)    | -158.9 (19) | 4072.0 (16)  | 34.5 (7)       |
| C35  | 5815 (2)    | 6130 (2)    | 3422 (2)     | 45.7 (8)       |
| N2   | 5822 (3)    | -2342 (2)   | 397 (2)      | 71.0 (11)      |
| C54  | 4195 (3)    | 1752 (3)    | 2230 (2)     | 65.9 (12)      |
| S7   | 9740.4 (7)  | 2710.2 (5)  | 1631.1 (5)   | 47.1 (2)       |
| C84  | 9563 (2)    | 4268.9 (18) | 3334.9 (16)  | 29.4 (6)       |
| O7   | 5860 (2)    | 2572.7 (16) | 1423.7 (17)  | 64.6 (8)       |
| O12  | 9750.6 (19) | 5769.1 (16) | 1967.7 (19)  | 65.2 (8)       |
| C86  | 9039 (3)    | 4584 (3)    | 4536.3 (19)  | 49.0 (9)       |
| C47  | 6774 (2)    | 459 (2)     | 841.9 (16)   | 35.0 (7)       |
| C36  | 5965 (3)    | 7371 (2)    | 2330 (3)     | 58.1 (11)      |
| C49  | 5178 (2)    | 385 (2)     | 1114.9 (19)  | 43.1 (8)       |
| C66  | 9395 (3)    | -228 (3)    | -2054 (2)    | 55.2 (10)      |
| C39  | 4349 (3)    | 7073 (2)    | 2515 (3)     | 54.9 (10)      |
| C56  | 7716 (2)    | -868.6 (19) | 393.6 (16)   | 32.2 (6)       |
| C52  | 6758 (3)    | 1330 (2)    | 1009.4 (18)  | 42.3 (8)       |
| S5   | 6153.3 (8)  | 7202.1 (7)  | 3250.6 (7)   | 68.6 (3)       |
| C88  | 7997 (2)    | 4541 (2)    | 3671 (2)     | 47.6 (9)       |
| C60  | 8015 (2)    | -1493 (2)   | 822.1 (18)   | 41.7 (8)       |
| C23  | 7525 (2)    | 1007 (2)    | 5050.8 (17)  | 34.9 (7)       |
| C48  | 5992 (2)    | -17 (2)     | 895.8 (18)   | 38.5 (7)       |
| C55  | 6632 (4)    | 3005 (3)    | 1587 (3)     | 76.1 (14)      |
| C59  | 8013 (3)    | -2570 (2)   | -298 (2)     | 46.7 (8)       |

**Table S9 Fractional Atomic Coordinates ( $\times 10^4$ ) and Equivalent Isotropic Displacement Parameters ( $\text{\AA}^2 \times 10^3$ ) for 6l\_auto.  $U_{\text{eq}}$  is defined as 1/3 of the trace of the orthogonalised  $U_{ij}$  tensor.**

| Atom | x            | y            | z            | U(eq)     |
|------|--------------|--------------|--------------|-----------|
| C33  | 5359 (2)     | 4658 (2)     | 3171.9 (19)  | 40.6 (7)  |
| O1   | 10928.7 (16) | -108.5 (15)  | 3929.0 (13)  | 45.0 (6)  |
| C11  | 7456 (2)     | 632 (2)      | 4332.3 (18)  | 39.4 (7)  |
| S8   | 10122.6 (8)  | 4217.9 (7)   | 655.1 (5)    | 54.7 (3)  |
| C31  | 1738 (3)     | 3019 (3)     | 4658 (2)     | 68.4 (13) |
| C16  | 8604 (3)     | 2143 (2)     | 4642 (2)     | 53.8 (10) |
| C5   | 10143 (2)    | -536 (2)     | 3934.1 (16)  | 34.2 (7)  |
| O2   | 11071.0 (17) | -1773.2 (17) | 3678.8 (14)  | 51.4 (6)  |
| C57  | 7463 (2)     | -1007.0 (19) | -343.3 (16)  | 30.9 (6)  |
| C7   | 10894 (3)    | 799 (2)      | 4033 (2)     | 49.7 (9)  |
| C13  | 6995 (3)     | 2493 (2)     | 4604 (2)     | 58.0 (11) |
| C91  | 9421 (4)     | 3565 (3)     | 199 (3)      | 82.5 (17) |
| C67  | 9675 (3)     | -404 (3)     | -1391 (2)    | 53.7 (10) |
| C38  | 4880 (4)     | 6319 (4)     | 4705 (3)     | 95.2 (19) |
| O16  | 5995.1 (19)  | 4155.6 (18)  | 3144 (2)     | 76.1 (10) |
| N1   | 9301 (3)     | 2240 (2)     | 4369 (3)     | 76.0 (12) |
| C64  | 7890 (3)     | -522 (2)     | -1601.4 (18) | 42.2 (8)  |
| C4   | 10231 (2)    | -1412 (2)    | 3781.1 (17)  | 40.0 (8)  |
| S6   | 5897.1 (9)   | 5808.5 (9)   | 4319.9 (6)   | 71.8 (4)  |
| C30  | 4083 (3)     | 1728 (3)     | 4112 (3)     | 69.9 (13) |
| C8   | 11357 (3)    | -1991 (3)    | 2968 (2)     | 57.4 (10) |
| C32  | 2090 (3)     | 5901 (3)     | 3529 (3)     | 60.7 (11) |
| N3   | 3694 (3)     | 7234 (3)     | 2832 (3)     | 86.5 (14) |
| C53  | 4337 (3)     | -894 (3)     | 1029 (3)     | 69.5 (13) |
| C12  | 7223 (3)     | 1075 (3)     | 3767 (2)     | 57.7 (11) |
| S3   | 8209.9 (9)   | -2582.8 (6)  | 622.5 (6)    | 61.9 (3)  |
| S4   | 8106.5 (9)   | -1301.3 (8)  | 1723.2 (5)   | 62.7 (3)  |
| C61  | 9201 (4)     | -1706 (4)    | 1835 (3)     | 95.3 (19) |
| S2   | 7118.3 (10)  | 530.7 (9)    | 2956.0 (6)   | 75.1 (4)  |
| C15  | 7951 (4)     | 868 (3)      | 2636 (4)     | 119 (3)   |

**Table S10 Anisotropic Displacement Parameters ( $\text{\AA}^2 \times 10^3$ ) for 6l\_auto. The Anisotropic displacement factor exponent takes the form:  $-2\pi^2[h^2a^*U_{11}+2hka^*b^*U_{12}+\dots]$ .**

| Atom | $U_{11}$  | $U_{22}$  | $U_{33}$  | $U_{12}$   | $U_{13}$   | $U_{23}$   |
|------|-----------|-----------|-----------|------------|------------|------------|
| O9   | 36.5 (14) | 49.1 (14) | 65.7 (16) | -4.0 (11)  | -7.2 (12)  | 3.8 (12)   |
| O3   | 66.1 (19) | 29.4 (13) | 99 (2)    | 14.0 (12)  | 1.2 (16)   | -18.0 (13) |
| O10  | 46.3 (16) | 69.5 (18) | 71.1 (18) | -27.9 (14) | -18.0 (13) | 21.8 (14)  |
| C70  | 40.3 (18) | 28.9 (15) | 32.0 (15) | -4.9 (13)  | -8.6 (13)  | -2.8 (12)  |
| C90  | 26.1 (15) | 24.8 (13) | 31.4 (14) | -1.0 (11)  | -7.6 (11)  | -4.8 (11)  |
| O11  | 75 (2)    | 33.5 (14) | 117 (3)   | -17.9 (14) | -22.7 (19) | 22.8 (15)  |

**Table S10 Anisotropic Displacement Parameters ( $\text{\AA}^2 \times 10^3$ ) for 6I\_auto. The Anisotropic displacement factor exponent takes the form:  $-2\pi^2[h^2a^{*2}U_{11}+2hka^*b^*U_{12}+\dots]$ .**

| Atom | U <sub>11</sub> | U <sub>22</sub> | U <sub>33</sub> | U <sub>12</sub> | U <sub>13</sub> | U <sub>23</sub> |
|------|-----------------|-----------------|-----------------|-----------------|-----------------|-----------------|
| C28  | 32.0 (17)       | 41.3 (17)       | 38.7 (16)       | 1.3 (13)        | -8.0 (13)       | -1.4 (13)       |
| C71  | 40.7 (18)       | 28.4 (15)       | 36.1 (16)       | -3.4 (13)       | -6.8 (13)       | 0.0 (12)        |
| C29  | 36.4 (18)       | 32.1 (16)       | 40.3 (17)       | 1.2 (13)        | -7.3 (14)       | -2.1 (13)       |
| C79  | 39.8 (18)       | 25.8 (15)       | 39.9 (16)       | 2.7 (13)        | -4.5 (14)       | -4.2 (12)       |
| C83  | 35.4 (17)       | 26.5 (14)       | 34.8 (15)       | 3.9 (12)        | -2.7 (13)       | -0.9 (12)       |
| C24  | 33.0 (17)       | 35.1 (16)       | 35.0 (15)       | 0.3 (13)        | -7.7 (13)       | -4.1 (12)       |
| C27  | 38.6 (19)       | 43.8 (18)       | 37.7 (17)       | -7.4 (14)       | -11.1 (14)      | 3.2 (14)        |
| C2   | 43 (2)          | 28.9 (15)       | 48.0 (19)       | 2.8 (13)        | -0.3 (15)       | -7.6 (13)       |
| C72  | 38.5 (19)       | 40.8 (17)       | 38.7 (17)       | -6.5 (14)       | -10.0 (14)      | -0.8 (13)       |
| C81  | 37.8 (18)       | 31.1 (15)       | 33.1 (15)       | 1.5 (13)        | -7.2 (13)       | -3.8 (12)       |
| C80  | 28.3 (16)       | 26.5 (14)       | 33.2 (15)       | -0.5 (11)       | -4.1 (12)       | -1.6 (11)       |
| C74  | 61 (2)          | 30.7 (16)       | 54 (2)          | -16.7 (16)      | -20.3 (18)      | 6.6 (15)        |
| C17  | 34.5 (18)       | 30.1 (15)       | 47.8 (18)       | 3.3 (13)        | -4.5 (14)       | -9.0 (13)       |
| C3   | 53 (2)          | 26.8 (15)       | 48.0 (19)       | 9.8 (14)        | -1.0 (16)       | -7.7 (13)       |
| C25  | 38.4 (19)       | 35.2 (16)       | 45.5 (18)       | 2.8 (14)        | -11.1 (14)      | -1.2 (14)       |
| O4   | 42.1 (17)       | 45.7 (16)       | 143 (3)         | -0.9 (13)       | 7.1 (18)        | -19.1 (18)      |
| C75  | 53 (2)          | 27.3 (15)       | 44.8 (18)       | -4.6 (14)       | -14.5 (16)      | -1.4 (13)       |
| C10  | 40 (2)          | 34.5 (17)       | 50.8 (19)       | 6.7 (15)        | -6.8 (15)       | -9.8 (14)       |
| C46  | 31.1 (17)       | 33.1 (16)       | 49.2 (19)       | 1.5 (13)        | -9.5 (14)       | -5.1 (13)       |
| C1   | 40.5 (18)       | 28.5 (15)       | 35.6 (16)       | 7.2 (13)        | -3.1 (13)       | -4.1 (12)       |
| C73  | 46 (2)          | 43.7 (19)       | 47.3 (19)       | -16.9 (16)      | -15.9 (16)      | 5.9 (15)        |
| C45  | 64 (3)          | 50 (2)          | 51 (2)          | 7.6 (18)        | -10.9 (19)      | -6.7 (17)       |
| C26  | 50 (2)          | 32.5 (16)       | 43.8 (18)       | -3.5 (14)       | -12.4 (15)      | 2.1 (13)        |
| C41  | 42 (2)          | 47 (2)          | 60 (2)          | 2.5 (16)        | -5.8 (17)       | -1.4 (17)       |
| C40  | 39.7 (19)       | 30.9 (15)       | 49.4 (19)       | 2.3 (13)        | -5.4 (15)       | -3.6 (14)       |
| C76  | 46 (2)          | 47 (2)          | 76 (3)          | 2.9 (17)        | -10.2 (19)      | 0.4 (19)        |
| C18  | 37 (2)          | 50 (2)          | 72 (3)          | 2.9 (16)        | -11.5 (18)      | -5.5 (18)       |
| C22  | 46 (2)          | 52 (2)          | 47 (2)          | -3.7 (16)       | -1.7 (16)       | -6.7 (16)       |
| C77  | 68 (3)          | 86 (3)          | 73 (3)          | -37 (3)         | -8 (2)          | 17 (3)          |
| C42  | 45 (2)          | 55 (2)          | 89 (3)          | 7.7 (18)        | 10 (2)          | 3 (2)           |
| C19  | 30 (2)          | 63 (3)          | 121 (4)         | 1.2 (18)        | 1 (2)           | -13 (3)         |
| C44  | 98 (4)          | 57 (2)          | 50 (2)          | 14 (2)          | 2 (2)           | -5.1 (19)       |
| C43  | 84 (4)          | 54 (2)          | 69 (3)          | 13 (2)          | 26 (3)          | 3 (2)           |
| C20  | 64 (3)          | 65 (3)          | 90 (4)          | -5 (2)          | 34 (3)          | -11 (3)         |
| C9   | 87 (3)          | 35 (2)          | 86 (3)          | -8 (2)          | 12 (3)          | -22 (2)         |
| C21  | 73 (3)          | 69 (3)          | 57 (3)          | -10 (2)         | 13 (2)          | -10 (2)         |
| C78  | 100 (4)         | 31.8 (19)       | 87 (3)          | -8 (2)          | -16 (3)         | 11 (2)          |
| S1   | 127.1 (12)      | 53.2 (6)        | 68.8 (7)        | 43.2 (7)        | -26.3 (7)       | 4.2 (5)         |
| C92  | 44 (2)          | 29.2 (15)       | 47.1 (18)       | 6.6 (14)        | -6.7 (16)       | -4.1 (13)       |
| O5   | 35.5 (15)       | 59.7 (17)       | 87 (2)          | 6.3 (12)        | -4.3 (13)       | -23.9 (15)      |
| O8   | 42.4 (15)       | 43.7 (14)       | 83 (2)          | -3.6 (12)       | -6.5 (13)       | -20.6 (13)      |
| C89  | 32.6 (18)       | 41.2 (17)       | 41.7 (17)       | 0.3 (14)        | -9.8 (14)       | -5.1 (14)       |

**Table S10 Anisotropic Displacement Parameters ( $\text{\AA}^2 \times 10^3$ ) for 6l\_auto. The Anisotropic displacement factor exponent takes the form:  $-2\pi^2[h^2a^{*2}U_{11}+2hka^*b^*U_{12}+\dots]$ .**

| Atom | U <sub>11</sub> | U <sub>22</sub> | U <sub>33</sub> | U <sub>12</sub> | U <sub>13</sub> | U <sub>23</sub> |
|------|-----------------|-----------------|-----------------|-----------------|-----------------|-----------------|
| O13  | 31.7 (13)       | 48.7 (14)       | 72.5 (17)       | 4.7 (11)        | -1.8 (12)       | 6.0 (12)        |
| C63  | 37.2 (18)       | 25.9 (14)       | 34.2 (15)       | 3.7 (12)        | -3.5 (13)       | -4.9 (11)       |
| O6   | 51.8 (17)       | 69.9 (18)       | 59.5 (16)       | 33.1 (14)       | -12.2 (13)      | -20.6 (14)      |
| C34  | 26.7 (16)       | 34.7 (16)       | 46.8 (18)       | 2.6 (12)        | -4.2 (13)       | -7.3 (13)       |
| C51  | 62 (2)          | 30.3 (16)       | 44.9 (19)       | 13.5 (16)       | -8.3 (16)       | -10.7 (14)      |
| C68  | 41 (2)          | 43.7 (18)       | 44.9 (19)       | 1.5 (15)        | -7.6 (15)       | -1.0 (15)       |
| O15  | 56.4 (17)       | 34.3 (13)       | 85 (2)          | -6.3 (11)       | -13.5 (14)      | 10.9 (13)       |
| C82  | 48 (2)          | 24.1 (14)       | 48.3 (19)       | -3.5 (13)       | -8.2 (15)       | -0.7 (13)       |
| C14  | 46 (2)          | 32.8 (16)       | 48.5 (19)       | 0.1 (14)        | 4.8 (15)        | -9.8 (14)       |
| C65  | 74 (3)          | 48 (2)          | 35.5 (18)       | -0.3 (19)       | -2.1 (18)       | 2.1 (15)        |
| C37  | 40 (2)          | 35.4 (17)       | 66 (2)          | 4.0 (14)        | -8.1 (17)       | 2.1 (16)        |
| C85  | 35.4 (18)       | 45.7 (18)       | 39.8 (17)       | 1.3 (14)        | -9.3 (14)       | -15.0 (14)      |
| C87  | 46 (2)          | 47 (2)          | 55 (2)          | -2.3 (16)       | 12.0 (17)       | -14.7 (16)      |
| N4   | 49 (2)          | 49.7 (19)       | 76 (2)          | 10.1 (15)       | 3.9 (18)        | -11.7 (16)      |
| O14  | 39.1 (14)       | 63.8 (17)       | 55.9 (15)       | -13.8 (12)      | -12.2 (12)      | 15.8 (12)       |
| C62  | 47 (2)          | 37.0 (18)       | 61 (2)          | -4.3 (16)       | -3.6 (19)       | -5.2 (16)       |
| C58  | 39.2 (18)       | 33.3 (16)       | 40.7 (17)       | -1.6 (13)       | -4.8 (14)       | -8.7 (13)       |
| C69  | 40.6 (19)       | 31.9 (16)       | 35.4 (16)       | 3.2 (14)        | -6.3 (13)       | -8.0 (12)       |
| C50  | 45 (2)          | 46.8 (19)       | 42.6 (18)       | 22.5 (16)       | -8.0 (15)       | -13.1 (15)      |
| C6   | 40.0 (18)       | 27.5 (14)       | 35.8 (16)       | 6.0 (13)        | -3.0 (13)       | -3.2 (12)       |
| C35  | 35.5 (19)       | 45.1 (19)       | 59 (2)          | 7.6 (15)        | -12.8 (16)      | -18.9 (16)      |
| N2   | 56 (2)          | 58 (2)          | 95 (3)          | -12.4 (18)      | 14 (2)          | -2 (2)          |
| C54  | 63 (3)          | 72 (3)          | 61 (3)          | 23 (2)          | 2 (2)           | -15 (2)         |
| S7   | 65.8 (6)        | 32.6 (4)        | 45.8 (5)        | -10.2 (4)       | -15.6 (4)       | -9.9 (3)        |
| C84  | 30.0 (16)       | 22.7 (13)       | 36.1 (15)       | -1.6 (11)       | -5.2 (12)       | -5.0 (11)       |
| O7   | 80 (2)          | 32.3 (13)       | 82 (2)          | 18.1 (13)       | -4.5 (16)       | -17.7 (13)      |
| O12  | 49.5 (16)       | 31.3 (13)       | 111 (2)         | 9.4 (11)        | 7.9 (16)        | 5.2 (14)        |
| C86  | 53 (2)          | 55 (2)          | 40.1 (19)       | -1.3 (17)       | -2.9 (16)       | -18.2 (16)      |
| C47  | 37.4 (18)       | 31.5 (15)       | 36.7 (16)       | 7.1 (13)        | -6.5 (13)       | -8.9 (12)       |
| C36  | 46 (2)          | 33.7 (18)       | 95 (3)          | -4.5 (16)       | -7 (2)          | -2.5 (19)       |
| C49  | 39 (2)          | 46.7 (19)       | 44.4 (18)       | 9.8 (15)        | -6.2 (15)       | -12.0 (15)      |
| C66  | 66 (3)          | 49 (2)          | 47 (2)          | -2.3 (18)       | 15.6 (19)       | 1.5 (16)        |
| C39  | 40 (2)          | 34.5 (18)       | 90 (3)          | 6.4 (15)        | -8 (2)          | -5.1 (18)       |
| C56  | 30.8 (16)       | 30.9 (15)       | 35.1 (15)       | 3.4 (12)        | -3.0 (12)       | -7.5 (12)       |
| C52  | 51 (2)          | 29.5 (16)       | 47.4 (19)       | 4.7 (14)        | -4.8 (16)       | -9.1 (14)       |
| S5   | 64.6 (7)        | 43.6 (5)        | 103.4 (9)       | -6.9 (5)        | -30.6 (6)       | -23.2 (5)       |
| C88  | 28.0 (18)       | 50 (2)          | 65 (2)          | 2.0 (15)        | -3.9 (16)       | -4.6 (17)       |
| C60  | 49 (2)          | 37.1 (17)       | 40.3 (17)       | 4.3 (15)        | -13.3 (15)      | -3.9 (14)       |
| C23  | 33.0 (17)       | 30.9 (15)       | 41.3 (17)       | 4.5 (12)        | -5.7 (13)       | -4.0 (13)       |
| C48  | 38.1 (19)       | 33.6 (16)       | 44.5 (18)       | 8.3 (13)        | -6.1 (14)       | -12.1 (13)      |
| C55  | 105 (4)         | 37 (2)          | 91 (4)          | 4 (2)           | -25 (3)         | -24 (2)         |
| C59  | 53 (2)          | 30.3 (16)       | 57 (2)          | 6.1 (15)        | -4.2 (17)       | -12.2 (15)      |

**Table S10 Anisotropic Displacement Parameters ( $\text{\AA}^2 \times 10^3$ ) for 6l\_auto. The Anisotropic displacement factor exponent takes the form:  $-2\pi^2[h^2a^{*2}U_{11}+2hka^*b^*U_{12}+\dots]$ .**

| Atom | U <sub>11</sub> | U <sub>22</sub> | U <sub>33</sub> | U <sub>12</sub> | U <sub>13</sub> | U <sub>23</sub> |
|------|-----------------|-----------------|-----------------|-----------------|-----------------|-----------------|
| C33  | 35.1 (18)       | 34.8 (17)       | 53 (2)          | 3.4 (14)        | -8.1 (15)       | -4.6 (14)       |
| O1   | 34.5 (13)       | 42.0 (13)       | 58.6 (15)       | 5.0 (10)        | -4.4 (11)       | -6.4 (11)       |
| C11  | 40.2 (19)       | 34.9 (17)       | 43.8 (18)       | 11.0 (14)       | -7.2 (14)       | -8.0 (14)       |
| S8   | 77.9 (7)        | 55.0 (5)        | 32.1 (4)        | -0.2 (5)        | -10.8 (4)       | 0.3 (4)         |
| C31  | 63 (3)          | 82 (3)          | 59 (3)          | -19 (2)         | 0 (2)           | 13 (2)          |
| C16  | 56 (3)          | 33.0 (18)       | 69 (3)          | 0.6 (16)        | 10 (2)          | 1.2 (17)        |
| C5   | 35.5 (18)       | 35.5 (16)       | 31.4 (15)       | 6.0 (13)        | -3.6 (13)       | -3.0 (12)       |
| O2   | 43.2 (15)       | 54.0 (15)       | 57.6 (15)       | 24.8 (12)       | -8.3 (12)       | -13.0 (12)      |
| C57  | 29.8 (16)       | 29.5 (14)       | 34.4 (15)       | 4.7 (12)        | -7.5 (12)       | -6.2 (12)       |
| C7   | 48 (2)          | 41.4 (19)       | 60 (2)          | -2.7 (16)       | -5.7 (18)       | -4.0 (16)       |
| C13  | 66 (3)          | 29.8 (17)       | 76 (3)          | 16.8 (17)       | 4 (2)           | -4.3 (17)       |
| C91  | 126 (5)         | 70 (3)          | 61 (3)          | 2 (3)           | -50 (3)         | -10 (2)         |
| C67  | 38 (2)          | 56 (2)          | 65 (2)          | -3.8 (17)       | 3.3 (18)        | -2.8 (19)       |
| C38  | 100 (4)         | 128 (5)         | 59 (3)          | 40 (4)          | -11 (3)         | -29 (3)         |
| O16  | 38.0 (15)       | 39.6 (15)       | 148 (3)         | 8.0 (12)        | -1.8 (17)       | 7.6 (17)        |
| N1   | 63 (2)          | 47 (2)          | 111 (3)         | 1.3 (17)        | 25 (2)          | 10 (2)          |
| C64  | 48 (2)          | 41.1 (18)       | 39.1 (17)       | 2.9 (15)        | -10.8 (15)      | -4.4 (14)       |
| C4   | 42 (2)          | 38.6 (17)       | 38.7 (17)       | 15.5 (14)       | -3.0 (14)       | -6.4 (13)       |
| S6   | 74.5 (8)        | 87.4 (8)        | 56.8 (6)        | 32.7 (6)        | -23.5 (5)       | -21.4 (6)       |
| C30  | 79 (3)          | 43 (2)          | 86 (3)          | 5 (2)           | -10 (3)         | 23 (2)          |
| C8   | 57 (3)          | 54 (2)          | 59 (2)          | 19.8 (19)       | 4.8 (19)        | -9.7 (18)       |
| C32  | 51 (2)          | 46 (2)          | 83 (3)          | 11.8 (18)       | 1 (2)           | 5 (2)           |
| N3   | 51 (2)          | 52 (2)          | 153 (4)         | 8.7 (18)        | 12 (3)          | -13 (2)         |
| C53  | 49 (3)          | 55 (2)          | 104 (4)         | -1.7 (19)       | -3 (2)          | -14 (2)         |
| C12  | 79 (3)          | 49 (2)          | 46 (2)          | 22 (2)          | -14 (2)         | -6.0 (17)       |
| S3   | 88.8 (8)        | 34.9 (5)        | 65.5 (6)        | 19.1 (5)        | -28.8 (6)       | -3.6 (4)        |
| S4   | 81.8 (8)        | 67.5 (7)        | 41.4 (5)        | -1.3 (6)        | -18.6 (5)       | -4.8 (4)        |
| C61  | 96 (4)          | 107 (5)         | 91 (4)          | -11 (3)         | -57 (3)         | 8 (3)           |
| S2   | 83.4 (9)        | 85.9 (9)        | 58.6 (6)        | -13.3 (7)       | -14.6 (6)       | -13.6 (6)       |
| C15  | 133 (5)         | 52 (3)          | 201 (7)         | 18 (3)          | -149 (5)        | -50 (3)         |

**Table S11 Bond Lengths for 6l\_auto.**

| Atom Atom | Length/ $\text{\AA}$ | Atom Atom | Length/ $\text{\AA}$ |
|-----------|----------------------|-----------|----------------------|
| O9 C72    | 1.365 (4)            | C89 C84   | 1.386 (4)            |
| O9 C76    | 1.425 (4)            | C89 C88   | 1.388 (5)            |
| O3 C3     | 1.363 (4)            | O13 C32   | 1.417 (5)            |
| O3 C9     | 1.422 (5)            | C63 C68   | 1.376 (5)            |
| O10 C73   | 1.372 (4)            | C63 C57   | 1.525 (4)            |
| O10 C77   | 1.432 (5)            | C63 C64   | 1.400 (4)            |
| C70 C71   | 1.387 (5)            | O6 C50    | 1.371 (4)            |



**Table S11 Bond Lengths for 6l\_auto.**

| Atom | Atom | Length/Å  | Atom | Atom | Length/Å  |
|------|------|-----------|------|------|-----------|
| C70  | C79  | 1.493 (5) | O6   | C54  | 1.420 (5) |
| C70  | C75  | 1.397 (4) | C34  | C35  | 1.332 (5) |
| C90  | C83  | 1.549 (4) | C34  | C33  | 1.505 (4) |
| C90  | C80  | 1.513 (4) | C51  | C50  | 1.391 (6) |
| C90  | C84  | 1.524 (4) | C51  | O7   | 1.366 (4) |
| O11  | C74  | 1.363 (4) | C51  | C52  | 1.387 (5) |
| O11  | C78  | 1.405 (6) | C68  | C67  | 1.385 (5) |
| C28  | C29  | 1.390 (5) | O15  | C30  | 1.422 (5) |
| C28  | C27  | 1.394 (5) | C82  | S7   | 1.805 (3) |
| C28  | O13  | 1.363 (4) | C14  | C23  | 1.541 (4) |
| C71  | C72  | 1.394 (5) | C14  | C16  | 1.467 (5) |
| C29  | C24  | 1.399 (4) | C14  | C13  | 1.534 (6) |
| C79  | C80  | 1.510 (4) | C65  | C66  | 1.370 (6) |
| C79  | O12  | 1.219 (4) | C65  | C64  | 1.376 (5) |
| C83  | C92  | 1.474 (5) | C37  | C36  | 1.524 (5) |
| C83  | C82  | 1.519 (5) | C37  | C39  | 1.468 (6) |
| C24  | C25  | 1.390 (4) | C85  | C84  | 1.386 (4) |
| C24  | C33  | 1.489 (5) | C85  | C86  | 1.381 (5) |
| C27  | C26  | 1.396 (5) | C87  | C86  | 1.376 (6) |
| C27  | O14  | 1.374 (4) | C87  | C88  | 1.369 (6) |
| C2   | C3   | 1.381 (5) | O14  | C31  | 1.420 (5) |
| C2   | C1   | 1.400 (4) | C62  | C58  | 1.470 (5) |
| C72  | C73  | 1.394 (5) | C62  | N2   | 1.133 (5) |
| C81  | C80  | 1.336 (4) | C58  | C59  | 1.520 (5) |
| C81  | S7   | 1.754 (3) | C58  | C57  | 1.547 (4) |
| C81  | S8   | 1.764 (3) | C69  | C47  | 1.484 (4) |
| C74  | C75  | 1.388 (5) | C69  | C56  | 1.512 (4) |
| C74  | C73  | 1.392 (6) | C50  | C49  | 1.401 (5) |
| C17  | C18  | 1.387 (5) | C6   | C5   | 1.395 (4) |
| C17  | C22  | 1.382 (5) | C35  | S5   | 1.753 (4) |
| C17  | C23  | 1.525 (5) | C35  | S6   | 1.775 (4) |
| C3   | C4   | 1.401 (5) | O7   | C55  | 1.413 (6) |
| C25  | C26  | 1.385 (5) | C47  | C52  | 1.392 (4) |
| O4   | C10  | 1.214 (5) | C47  | C48  | 1.391 (5) |
| C10  | C1   | 1.485 (5) | C36  | S5   | 1.807 (5) |
| C10  | C11  | 1.510 (4) | C49  | C48  | 1.394 (5) |
| C46  | C40  | 1.525 (5) | C66  | C67  | 1.381 (6) |
| C46  | C34  | 1.513 (5) | C39  | N3   | 1.130 (5) |
| C46  | C37  | 1.552 (4) | C56  | C60  | 1.339 (5) |
| C1   | C6   | 1.389 (5) | C56  | C57  | 1.508 (4) |
| C45  | C40  | 1.387 (5) | C60  | S3   | 1.752 (3) |
| C45  | C44  | 1.381 (6) | C60  | S4   | 1.766 (3) |
| C26  | O15  | 1.361 (4) | C23  | C11  | 1.515 (5) |

**Table S11 Bond Lengths for 6l\_auto.**

| Atom | Atom | Length/Å  | Atom | Atom | Length/Å  |
|------|------|-----------|------|------|-----------|
| C41  | C40  | 1.387 (5) | C59  | S3   | 1.800 (4) |
| C41  | C42  | 1.387 (6) | C33  | O16  | 1.217 (4) |
| C18  | C19  | 1.385 (6) | O1   | C5   | 1.362 (4) |
| C22  | C21  | 1.373 (6) | O1   | C7   | 1.422 (4) |
| C42  | C43  | 1.378 (7) | C11  | C12  | 1.325 (5) |
| C19  | C20  | 1.367 (8) | S8   | C91  | 1.774 (5) |
| C44  | C43  | 1.363 (7) | C16  | N1   | 1.132 (5) |
| C20  | C21  | 1.364 (8) | C5   | C4   | 1.396 (4) |
| S1   | C13  | 1.801 (5) | O2   | C4   | 1.367 (4) |
| S1   | C12  | 1.749 (4) | O2   | C8   | 1.428 (5) |
| C92  | N4   | 1.131 (5) | C38  | S6   | 1.806 (5) |
| O5   | C49  | 1.358 (5) | C12  | S2   | 1.802 (4) |
| O5   | C53  | 1.423 (5) | S4   | C61  | 1.774 (6) |
| O8   | C69  | 1.222 (4) | S2   | C15  | 1.436 (8) |

**Table S12 Bond Angles for 6l\_auto.**

| Atom | Atom | Atom | Angle/°   | Atom | Atom | Atom | Angle/°   |
|------|------|------|-----------|------|------|------|-----------|
| C76  | O9   | C72  | 118.4 (3) | O7   | C51  | C50  | 115.7 (3) |
| C9   | O3   | C3   | 118.4 (3) | C52  | C51  | C50  | 120.0 (3) |
| C77  | O10  | C73  | 115.0 (3) | C52  | C51  | O7   | 124.3 (4) |
| C79  | C70  | C71  | 121.8 (3) | C67  | C68  | C63  | 120.5 (3) |
| C75  | C70  | C71  | 121.1 (3) | C30  | O15  | C26  | 118.3 (3) |
| C75  | C70  | C79  | 117.1 (3) | S7   | C82  | C83  | 112.7 (2) |
| C80  | C90  | C83  | 111.5 (2) | C16  | C14  | C23  | 110.2 (3) |
| C84  | C90  | C83  | 109.5 (2) | C13  | C14  | C23  | 112.6 (3) |
| C84  | C90  | C80  | 114.4 (2) | C13  | C14  | C16  | 110.7 (3) |
| C78  | O11  | C74  | 118.7 (3) | C64  | C65  | C66  | 120.6 (4) |
| C27  | C28  | C29  | 120.4 (3) | C36  | C37  | C46  | 111.9 (3) |
| O13  | C28  | C29  | 124.9 (3) | C39  | C37  | C46  | 109.8 (3) |
| O13  | C28  | C27  | 114.7 (3) | C39  | C37  | C36  | 111.1 (3) |
| C72  | C71  | C70  | 119.2 (3) | C86  | C85  | C84  | 120.8 (3) |
| C24  | C29  | C28  | 118.9 (3) | C88  | C87  | C86  | 119.9 (3) |
| C80  | C79  | C70  | 120.0 (3) | C31  | O14  | C27  | 115.5 (3) |
| O12  | C79  | C70  | 120.7 (3) | N2   | C62  | C58  | 175.7 (4) |
| O12  | C79  | C80  | 119.4 (3) | C59  | C58  | C62  | 110.7 (3) |
| C92  | C83  | C90  | 109.7 (2) | C57  | C58  | C62  | 109.3 (3) |
| C82  | C83  | C90  | 111.6 (2) | C57  | C58  | C59  | 111.7 (3) |
| C82  | C83  | C92  | 110.5 (3) | C47  | C69  | O8   | 121.0 (3) |
| C25  | C24  | C29  | 120.7 (3) | C56  | C69  | O8   | 119.3 (3) |
| C33  | C24  | C29  | 122.1 (3) | C56  | C69  | C47  | 119.7 (3) |
| C33  | C24  | C25  | 117.2 (3) | C51  | C50  | O6   | 120.9 (3) |

**Table S12 Bond Angles for 6l\_auto.**

| Atom Atom Atom | Angle/°     | Atom Atom Atom | Angle/°     |
|----------------|-------------|----------------|-------------|
| C26 C27 C28    | 120.2 (3)   | C49 C50 O6     | 118.6 (4)   |
| O14 C27 C28    | 118.4 (3)   | C49 C50 C51    | 120.5 (3)   |
| O14 C27 C26    | 121.3 (3)   | C5 C6 C1       | 119.3 (3)   |
| C1 C2 C3       | 119.6 (3)   | S5 C35 C34     | 126.9 (3)   |
| C71 C72 O9     | 125.3 (3)   | S6 C35 C34     | 121.7 (3)   |
| C73 C72 O9     | 114.7 (3)   | S6 C35 S5      | 111.4 (2)   |
| C73 C72 C71    | 120.0 (3)   | C82 S7 C81     | 101.16 (14) |
| S7 C81 C80     | 126.1 (2)   | C89 C84 C90    | 122.8 (3)   |
| S8 C81 C80     | 119.1 (2)   | C85 C84 C90    | 118.7 (3)   |
| S8 C81 S7      | 114.43 (17) | C85 C84 C89    | 118.5 (3)   |
| C79 C80 C90    | 114.5 (2)   | C55 O7 C51     | 118.2 (3)   |
| C81 C80 C90    | 125.6 (3)   | C87 C86 C85    | 120.1 (3)   |
| C81 C80 C79    | 119.9 (3)   | C52 C47 C69    | 117.2 (3)   |
| C75 C74 O11    | 124.8 (4)   | C48 C47 C69    | 121.7 (3)   |
| C73 C74 O11    | 115.1 (3)   | C48 C47 C52    | 121.1 (3)   |
| C73 C74 C75    | 120.1 (3)   | S5 C36 C37     | 113.0 (3)   |
| C22 C17 C18    | 118.3 (3)   | C50 C49 O5     | 115.1 (3)   |
| C23 C17 C18    | 123.1 (3)   | C48 C49 O5     | 125.5 (3)   |
| C23 C17 C22    | 118.5 (3)   | C48 C49 C50    | 119.5 (3)   |
| C2 C3 O3       | 124.4 (3)   | C67 C66 C65    | 119.7 (3)   |
| C4 C3 O3       | 115.5 (3)   | N3 C39 C37     | 178.3 (4)   |
| C4 C3 C2       | 120.0 (3)   | C60 C56 C69    | 120.1 (3)   |
| C26 C25 C24    | 120.2 (3)   | C57 C56 C69    | 115.2 (3)   |
| C74 C75 C70    | 119.3 (3)   | C57 C56 C60    | 124.6 (3)   |
| C1 C10 O4      | 120.8 (3)   | C47 C52 C51    | 119.5 (3)   |
| C11 C10 O4     | 119.1 (3)   | C36 S5 C35     | 102.30 (18) |
| C11 C10 C1     | 120.0 (3)   | C87 C88 C89    | 120.3 (3)   |
| C34 C46 C40    | 114.6 (3)   | S3 C60 C56     | 126.6 (3)   |
| C37 C46 C40    | 109.3 (3)   | S4 C60 C56     | 120.7 (3)   |
| C37 C46 C34    | 111.6 (3)   | S4 C60 S3      | 112.23 (19) |
| C10 C1 C2      | 116.9 (3)   | C14 C23 C17    | 110.6 (3)   |
| C6 C1 C2       | 120.9 (3)   | C11 C23 C17    | 113.7 (3)   |
| C6 C1 C10      | 122.0 (3)   | C11 C23 C14    | 111.5 (3)   |
| C72 C73 O10    | 118.5 (3)   | C49 C48 C47    | 119.5 (3)   |
| C74 C73 O10    | 121.3 (3)   | S3 C59 C58     | 111.4 (2)   |
| C74 C73 C72    | 120.2 (3)   | C34 C33 C24    | 121.3 (3)   |
| C44 C45 C40    | 120.1 (4)   | O16 C33 C24    | 119.9 (3)   |
| C25 C26 C27    | 119.6 (3)   | O16 C33 C34    | 118.8 (3)   |
| O15 C26 C27    | 115.9 (3)   | C7 O1 C5       | 118.4 (3)   |
| O15 C26 C25    | 124.5 (3)   | C23 C11 C10    | 115.8 (3)   |
| C42 C41 C40    | 120.4 (4)   | C12 C11 C10    | 119.0 (3)   |
| C45 C40 C46    | 118.3 (3)   | C12 C11 C23    | 125.1 (3)   |
| C41 C40 C46    | 122.7 (3)   | C91 S8 C81     | 105.3 (2)   |

**Table S12 Bond Angles for 6l\_auto.**

| Atom | Atom | Atom | Angle/°    | Atom | Atom | Atom | Angle/°    |
|------|------|------|------------|------|------|------|------------|
| C41  | C40  | C45  | 118.9(4)   | N1   | C16  | C14  | 178.0(4)   |
| C19  | C18  | C17  | 119.9(4)   | O1   | C5   | C6   | 124.8(3)   |
| C21  | C22  | C17  | 121.3(4)   | C4   | C5   | C6   | 120.2(3)   |
| C43  | C42  | C41  | 120.0(4)   | C4   | C5   | O1   | 115.0(3)   |
| C20  | C19  | C18  | 120.6(4)   | C8   | O2   | C4   | 115.4(3)   |
| C43  | C44  | C45  | 120.9(4)   | C58  | C57  | C63  | 109.6(2)   |
| C44  | C43  | C42  | 119.8(4)   | C56  | C57  | C63  | 114.0(3)   |
| C21  | C20  | C19  | 119.8(4)   | C56  | C57  | C58  | 111.6(2)   |
| C20  | C21  | C22  | 120.1(5)   | C14  | C13  | S1   | 113.5(2)   |
| C12  | S1   | C13  | 101.42(18) | C66  | C67  | C68  | 120.2(4)   |
| N4   | C92  | C83  | 177.5(4)   | C65  | C64  | C63  | 120.3(4)   |
| C53  | O5   | C49  | 118.1(3)   | C5   | C4   | C3   | 120.0(3)   |
| C88  | C89  | C84  | 120.4(3)   | O2   | C4   | C3   | 121.1(3)   |
| C32  | O13  | C28  | 118.3(3)   | O2   | C4   | C5   | 118.8(3)   |
| C57  | C63  | C68  | 123.1(3)   | C38  | S6   | C35  | 98.6(2)    |
| C64  | C63  | C68  | 118.8(3)   | C11  | C12  | S1   | 127.3(3)   |
| C64  | C63  | C57  | 118.1(3)   | S2   | C12  | S1   | 112.5(2)   |
| C54  | O6   | C50  | 113.7(3)   | S2   | C12  | C11  | 120.2(3)   |
| C35  | C34  | C46  | 123.9(3)   | C59  | S3   | C60  | 101.25(16) |
| C33  | C34  | C46  | 115.6(3)   | C61  | S4   | C60  | 101.9(2)   |
| C33  | C34  | C35  | 120.3(3)   | C15  | S2   | C12  | 92.1(3)    |

**Table S13 Torsion Angles for 6l\_auto.**

| A   | B   | C   | D   | Angle/°   | A   | B   | C   | D   | Angle/°   |
|-----|-----|-----|-----|-----------|-----|-----|-----|-----|-----------|
| O9  | C72 | C71 | C70 | 179.8(3)  | C10 | C11 | C23 | C14 | 158.1(3)  |
| O9  | C72 | C73 | O10 | 0.6(3)    | C10 | C11 | C12 | S1  | 177.0(3)  |
| O9  | C72 | C73 | C74 | -178.0(3) | C10 | C11 | C12 | S2  | -0.2(4)   |
| O3  | C3  | C2  | C1  | -178.8(4) | C46 | C40 | C45 | C44 | 175.5(3)  |
| O3  | C3  | C4  | C5  | 178.4(3)  | C46 | C40 | C41 | C42 | -176.0(3) |
| O3  | C3  | C4  | O2  | -4.2(4)   | C46 | C34 | C35 | S5  | -2.9(4)   |
| O10 | C73 | C72 | C71 | -177.9(3) | C46 | C34 | C35 | S6  | 176.3(3)  |
| O10 | C73 | C74 | O11 | -0.5(4)   | C46 | C34 | C33 | O16 | 94.7(4)   |
| O10 | C73 | C74 | C75 | 179.0(3)  | C46 | C37 | C36 | S5  | -61.6(3)  |
| C70 | C71 | C72 | C73 | -1.8(4)   | C1  | C6  | C5  | O1  | -179.0(3) |
| C70 | C79 | C80 | C90 | 88.2(3)   | C1  | C6  | C5  | C4  | 1.5(4)    |
| C70 | C79 | C80 | C81 | -92.9(3)  | C45 | C40 | C41 | C42 | 0.9(4)    |
| C70 | C75 | C74 | O11 | 179.2(3)  | C45 | C44 | C43 | C42 | 0.7(5)    |
| C70 | C75 | C74 | C73 | -0.2(4)   | C41 | C42 | C43 | C44 | -1.3(5)   |
| C90 | C83 | C82 | S7  | 65.4(2)   | C18 | C19 | C20 | C21 | -1.2(5)   |
| C90 | C80 | C79 | O12 | -91.0(3)  | C22 | C21 | C20 | C19 | 1.3(5)    |
| C90 | C80 | C81 | S7  | 3.9(4)    | S1  | C13 | C14 | C23 | -61.6(3)  |

**Table S13 Torsion Angles for 6l\_auto.**

| A   | B   | C   | D   | Angle/°    | A   | B   | C   | D   | Angle/°    |
|-----|-----|-----|-----|------------|-----|-----|-----|-----|------------|
| C90 | C80 | C81 | S8  | -168.7 (3) | S1  | C13 | C14 | C16 | 62.2 (3)   |
| C90 | C84 | C89 | C88 | 176.8 (3)  | S1  | C12 | C11 | C23 | 0.1 (5)    |
| C90 | C84 | C85 | C86 | -176.9 (3) | O5  | C49 | C50 | O6  | -1.5 (4)   |
| O11 | C74 | C73 | C72 | 178.1 (3)  | O5  | C49 | C50 | C51 | 179.2 (3)  |
| C28 | C29 | C24 | C25 | -0.2 (4)   | O5  | C49 | C48 | C47 | 180.0 (4)  |
| C28 | C29 | C24 | C33 | 179.9 (3)  | O8  | C69 | C47 | C52 | 1.3 (4)    |
| C28 | C27 | C26 | C25 | 0.2 (4)    | O8  | C69 | C47 | C48 | -177.2 (3) |
| C28 | C27 | C26 | O15 | -178.5 (3) | O8  | C69 | C56 | C60 | 76.2 (4)   |
| C28 | C27 | O14 | C31 | -113.0 (4) | O8  | C69 | C56 | C57 | -100.6 (3) |
| C71 | C72 | C73 | C74 | 3.5 (4)    | C89 | C84 | C85 | C86 | 0.3 (4)    |
| C29 | C24 | C25 | C26 | -0.0 (4)   | C89 | C88 | C87 | C86 | -0.5 (4)   |
| C29 | C24 | C33 | C34 | -2.4 (4)   | C63 | C68 | C67 | C66 | 0.7 (4)    |
| C29 | C24 | C33 | O16 | -179.8 (4) | C63 | C57 | C58 | C62 | -167.3 (3) |
| C79 | C80 | C81 | S7  | -174.9 (2) | C63 | C57 | C58 | C59 | 70.0 (3)   |
| C79 | C80 | C81 | S8  | 12.5 (3)   | C63 | C57 | C56 | C69 | 73.8 (3)   |
| C24 | C25 | C26 | C27 | 0.0 (4)    | C63 | C57 | C56 | C60 | -102.9 (3) |
| C24 | C25 | C26 | O15 | 178.6 (3)  | C63 | C64 | C65 | C66 | -0.6 (4)   |
| C24 | C33 | C34 | C46 | -82.8 (3)  | O6  | C50 | C51 | O7  | 1.6 (4)    |
| C24 | C33 | C34 | C35 | 101.4 (3)  | O6  | C50 | C51 | C52 | -178.0 (3) |
| C27 | C26 | O15 | C30 | -157.1 (4) | O6  | C50 | C49 | C48 | 179.0 (3)  |
| C2  | C3  | C4  | C5  | -1.6 (4)   | C51 | C50 | C49 | C48 | -0.2 (4)   |
| C2  | C3  | C4  | O2  | 175.7 (3)  | C51 | C52 | C47 | C69 | -178.2 (3) |
| C2  | C1  | C10 | O4  | 15.0 (4)   | C51 | C52 | C47 | C48 | 0.4 (4)    |
| C2  | C1  | C10 | C11 | -168.6 (3) | C68 | C67 | C66 | C65 | -0.5 (5)   |
| C2  | C1  | C6  | C5  | -2.0 (4)   | C14 | C23 | C11 | C12 | -25.0 (4)  |
| C72 | C73 | C74 | C75 | -2.5 (4)   | C85 | C86 | C87 | C88 | 0.6 (4)    |
| C17 | C18 | C19 | C20 | 0.0 (5)    | C62 | C58 | C59 | S3  | -55.3 (3)  |
| C17 | C22 | C21 | C20 | -0.2 (5)   | C62 | C58 | C57 | C56 | 65.6 (3)   |
| C17 | C23 | C14 | C16 | 164.1 (3)  | C58 | C57 | C56 | C69 | -161.4 (3) |
| C17 | C23 | C14 | C13 | -71.7 (3)  | C58 | C57 | C56 | C60 | 21.9 (3)   |
| C17 | C23 | C11 | C10 | -76.1 (3)  | C69 | C47 | C48 | C49 | 179.1 (3)  |
| C17 | C23 | C11 | C12 | 100.9 (4)  | C69 | C56 | C60 | S3  | -174.5 (2) |
| C3  | C4  | C5  | C6  | 0.3 (4)    | C69 | C56 | C60 | S4  | 14.5 (3)   |
| C3  | C4  | C5  | O1  | -179.2 (3) | C50 | C49 | C48 | C47 | -0.7 (4)   |
| C3  | C4  | O2  | C8  | 73.4 (4)   | C6  | C5  | O1  | C7  | -3.6 (4)   |
| C25 | C26 | O15 | C30 | 24.3 (5)   | C6  | C5  | C4  | O2  | -177.2 (3) |
| O4  | C10 | C1  | C6  | -160.7 (4) | C23 | C11 | C12 | S2  | -177.1 (3) |
| O4  | C10 | C11 | C23 | 84.2 (4)   | O1  | C5  | C4  | O2  | 3.4 (3)    |
| O4  | C10 | C11 | C12 | -93.0 (5)  | C5  | C4  | O2  | C8  | -109.2 (3) |
| C10 | C1  | C6  | C5  | 173.6 (3)  |     |     |     |     |            |

**Table S14 Hydrogen Atom Coordinates ( $\text{\AA}\times 10^4$ ) and Isotropic Displacement Parameters ( $\text{\AA}^2\times 10^3$ ) for 6l\_auto.**

| Atom | x          | y           | z            | U(eq)     |
|------|------------|-------------|--------------|-----------|
| H90  | 10877 (2)  | 4291.4 (18) | 2945.1 (15)  | 32.4 (7)  |
| H71  | 11988 (2)  | 4450 (2)    | 1771.1 (16)  | 41.8 (8)  |
| H29  | 3744 (2)   | 5474 (2)    | 3314.4 (17)  | 43.3 (8)  |
| H83  | 10523 (2)  | 2855.5 (18) | 3366.4 (16)  | 38.8 (8)  |
| H2   | 8117 (2)   | -1882 (2)   | 3911.4 (18)  | 48.1 (9)  |
| H25  | 4862 (2)   | 3094 (2)    | 3510.9 (18)  | 47.2 (9)  |
| H75  | 10889 (3)  | 6833 (2)    | 1538.0 (18)  | 49.1 (9)  |
| H46  | 4846 (2)   | 5557 (2)    | 2088.8 (18)  | 44.8 (8)  |
| H45  | 5372 (3)   | 5519 (3)    | 857 (2)      | 65.5 (12) |
| H41  | 7159 (3)   | 5542 (2)    | 2294 (2)     | 59.7 (11) |
| H76a | 13275 (17) | 3709 (4)    | 1256 (11)    | 83.8 (15) |
| H76b | 14243 (4)  | 3755 (5)    | 1498 (16)    | 83.8 (15) |
| H76c | 13410 (20) | 3925 (3)    | 2039 (5)     | 83.8 (15) |
| H18  | 5737 (3)   | 865 (3)     | 4924 (2)     | 63.4 (11) |
| H22  | 7440 (3)   | 704 (2)     | 6420.7 (19)  | 57.7 (10) |
| H77a | 13670 (20) | 6367 (12)   | -37 (3)      | 113 (2)   |
| H77b | 13590 (20) | 7340 (13)   | 174 (4)      | 113 (2)   |
| H77c | 14533 (4)  | 6870 (30)   | 89 (6)       | 113 (2)   |
| H42  | 8289 (3)   | 5211 (3)    | 1425 (3)     | 77.0 (14) |
| H19  | 4562 (3)   | 658 (3)     | 5787 (3)     | 86.1 (17) |
| H44  | 6512 (4)   | 5214 (3)    | -4 (2)       | 82.4 (15) |
| H43  | 7961 (4)   | 5073 (3)    | 271 (3)      | 85.8 (16) |
| H20  | 4822 (4)   | 499 (3)     | 6955 (3)     | 90.3 (18) |
| H9a  | 8592 (15)  | -2984 (13)  | 3063 (13)    | 105 (2)   |
| H9b  | 9093 (5)   | -3827 (8)   | 3306 (19)    | 105 (2)   |
| H9c  | 8465 (13)  | -3310 (20)  | 3856 (6)     | 105 (2)   |
| H21  | 6264 (3)   | 495 (3)     | 7268 (2)     | 80.8 (15) |
| H78a | 11306 (15) | 7936 (12)   | 623 (15)     | 109 (2)   |
| H78b | 11305 (14) | 8270 (20)   | 1393 (4)     | 109 (2)   |
| H78c | 11881 (4)  | 8736 (9)    | 767 (19)     | 109 (2)   |
| H89  | 8564 (2)   | 4270 (2)    | 2695.4 (18)  | 45.7 (9)  |
| H68  | 9251 (2)   | -748 (2)    | -384.1 (19)  | 51.6 (9)  |
| H82a | 9865 (2)   | 1910 (2)    | 2668.4 (18)  | 47.8 (9)  |
| H82b | 9201 (2)   | 2694 (2)    | 2811.9 (18)  | 47.8 (9)  |
| H14  | 7683 (2)   | 2202 (2)    | 5470.0 (19)  | 51.2 (9)  |
| H65  | 8319 (3)   | -175 (2)    | -2601.8 (19) | 63.6 (12) |
| H37  | 5138 (2)   | 6968 (2)    | 1611 (2)     | 56.8 (10) |
| H85  | 10313 (2)  | 4344 (2)    | 4155.8 (17)  | 47.5 (9)  |
| H87  | 7709 (3)   | 4796 (2)    | 4695 (2)     | 60.2 (11) |
| H58  | 7115 (2)   | -2026 (2)   | -941.2 (18)  | 45.0 (8)  |
| H6   | 9233 (2)   | 427.8 (19)  | 4163.1 (16)  | 41.4 (8)  |
| H54a | 4280 (20)  | 1206 (6)    | 2472 (2)     | 98.9 (18) |

**Table S14 Hydrogen Atom Coordinates ( $\text{\AA}\times 10^4$ ) and Isotropic Displacement Parameters ( $\text{\AA}^2\times 10^3$ ) for 6l\_auto.**

| Atom | x          | y           | z            | U(eq)      |
|------|------------|-------------|--------------|------------|
| H54b | 4605 (16)  | 2164 (18)   | 2376 (4)     | 98.9 (18)  |
| H54c | 3591 (8)   | 1960 (20)   | 2343 (3)     | 98.9 (18)  |
| H86  | 9159 (3)   | 4661 (3)    | 5001.1 (19)  | 58.8 (11)  |
| H36a | 5835 (3)   | 7980 (2)    | 2241 (3)     | 69.7 (13)  |
| H36b | 6510 (3)   | 7221 (2)    | 2040 (3)     | 69.7 (13)  |
| H66  | 9808 (3)   | -68 (3)     | -2429 (2)    | 66.2 (12)  |
| H52  | 7285 (3)   | 1643 (2)    | 968.6 (18)   | 50.8 (9)   |
| H88  | 7412 (2)   | 4589 (2)    | 3549 (2)     | 57.1 (10)  |
| H23  | 8048 (2)   | 730 (2)     | 5242.5 (17)  | 41.9 (8)   |
| H48  | 6013 (2)   | -600 (2)    | 786.5 (18)   | 46.2 (9)   |
| H55a | 6925 (15)  | 2667 (13)   | 1934 (16)    | 114 (2)    |
| H55b | 7034 (12)  | 3080 (20)   | 1167 (5)     | 114 (2)    |
| H55c | 6462 (5)   | 3561 (11)   | 1770 (20)    | 114 (2)    |
| H59a | 8550 (3)   | -2385 (2)   | -583 (2)     | 56.0 (10)  |
| H59b | 7880 (3)   | -3151 (2)   | -430 (2)     | 56.0 (10)  |
| H31a | 1119 (6)   | 2870 (20)   | 4742 (6)     | 102.6 (19) |
| H31b | 2107 (18)  | 2517 (14)   | 4738 (6)     | 102.6 (19) |
| H31c | 1870 (20)  | 3462 (9)    | 4975 (2)     | 102.6 (19) |
| H57  | 6917 (2)   | -663.3 (19) | -399.8 (16)  | 37.1 (8)   |
| H7a  | 10575 (17) | 1083 (3)    | 3673 (9)     | 74.6 (13)  |
| H7b  | 10591 (17) | 911 (3)     | 4490 (7)     | 74.6 (13)  |
| H7c  | 11492 (3)  | 1016 (4)    | 4007 (15)    | 74.6 (13)  |
| H13a | 7124 (3)   | 3106 (2)    | 4604 (2)     | 69.6 (13)  |
| H13b | 6413 (3)   | 2407 (2)    | 4862 (2)     | 69.6 (13)  |
| H91a | 9410 (20)  | 3787 (17)   | -278 (7)     | 124 (2)    |
| H91b | 9651 (16)  | 2981 (7)    | 190 (20)     | 124 (2)    |
| H91c | 8826 (8)   | 3570 (20)   | 435 (13)     | 124 (2)    |
| H67  | 10278 (3)  | -366 (3)    | -1321 (2)    | 64.4 (11)  |
| H38a | 4373 (4)   | 6070 (20)   | 4520 (20)    | 143 (3)    |
| H38b | 4835 (17)  | 6230 (30)   | 5209 (4)     | 143 (3)    |
| H38c | 4893 (15)  | 6929 (6)    | 4590 (20)    | 143 (3)    |
| H64  | 7288 (3)   | -557 (2)    | -1675.0 (18) | 50.6 (9)   |
| H30a | 4561 (11)  | 1709 (19)   | 3739 (7)     | 104.8 (19) |
| H30b | 4298 (16)  | 1968 (13)   | 4523 (12)    | 104.8 (19) |
| H30c | 3874 (7)   | 1152 (7)    | 4226 (19)    | 104.8 (19) |
| H8a  | 11280 (20) | -1496 (7)   | 2658 (3)     | 86.1 (16)  |
| H8b  | 11978 (6)  | -2160 (20)  | 2934 (4)     | 86.1 (16)  |
| H8c  | 11006 (15) | -2460 (14)  | 2832 (6)     | 86.1 (16)  |
| H32a | 2340 (20)  | 6004 (3)    | 3050 (6)     | 91.0 (17)  |
| H32b | 1493 (4)   | 6141 (4)    | 3585 (18)    | 91.0 (17)  |
| H32c | 2452 (19)  | 6171 (4)    | 3846 (12)    | 91.0 (17)  |
| H53a | 4710 (20)  | -1226 (4)   | 1322 (14)    | 104.3 (19) |

**Table S14 Hydrogen Atom Coordinates ( $\text{\AA}\times 10^4$ ) and Isotropic Displacement Parameters ( $\text{\AA}^2\times 10^3$ ) for 6l\_auto.**

| Atom | x         | y          | z         | U(eq)      |
|------|-----------|------------|-----------|------------|
| H53b | 3732 (5)  | -1090 (7)  | 1117 (19) | 104.3 (19) |
| H53c | 4540 (20) | -967 (4)   | 541 (5)   | 104.3 (19) |
| H61a | 9610 (7)  | -1500 (30) | 1451 (14) | 143 (3)    |
| H61b | 9384 (13) | -1510 (30) | 2274 (12) | 143 (3)    |
| H61c | 9202 (8)  | -2327 (4)  | 1840 (30) | 143 (3)    |
| H15a | 8080 (20) | 640 (30)   | 2174 (14) | 179 (4)    |
| H15b | 7907 (14) | 1488 (4)   | 2600 (30) | 179 (4)    |
| H15c | 8424 (8)  | 700 (30)   | 2924 (17) | 179 (4)    |

**Note:** The atom No. C15 is showing high thermal parameter values with high anisotropy. This is probably due to the receding of SCXRD data at room temperature. The atom needs splitting which tried to be performed by using the free variable method and with fixing thermal ellipsoid at 50-50 % but the atom is not refined properly thus atom C15 is kept as Isotropic.

### 3. Quantum Chemical Calculations

DFT calculations were employed to calculate the optimized energies and to compute the geometries for different possible conformers of intermediates and final product. DFT calculations with a hybrid functional B3LYP (Becke's three parameter hybrid functional using the LYP correlation functional) at 6-311++g(d,p) basis set were performed with the Gaussian 09W software package.<sup>2</sup> In every case, the optimized structures finally converged into the minima of the potential surface, which was confirmed from the absence of negative (imaginary) wavenumbers for any normal mode.

#### Optimized Coordinate\_3

---

```
# opt b3lyp/6-311g geom=connectivity
```

```
Int-CC_Opt
```

```
0 1
C      3.44301900  -1.52550700  -1.23455400
C      3.66212400  -2.72234200  -0.53729600
C      2.88618100  -3.03436600   0.58863600
C      1.90074600  -2.14552900   1.00438500
C      1.66684100  -0.93941100   0.32048400
C      2.45827000  -0.64591800  -0.80988300
C      0.59836700  -0.05105500   0.82318100
C      0.33411300   1.30368000   0.12500700
```



|   |             |             |             |
|---|-------------|-------------|-------------|
| O | -0.10933400 | -0.38259900 | 1.79447700  |
| C | -1.05055000 | 1.88392700  | 0.55583000  |
| C | 1.42485400  | 2.31582600  | 0.43639000  |
| S | 2.04404300  | 2.59459300  | 1.96964200  |
| C | -2.22743200 | 1.16148000  | -0.08695400 |
| C | -3.00857400 | 0.31390000  | 0.62829700  |
| C | -4.18739200 | -0.47431600 | 0.26180600  |
| C | -4.69846300 | -1.35296600 | 1.24266400  |
| C | -5.81466500 | -2.14763900 | 0.99194400  |
| C | -6.45424100 | -2.08001100 | -0.24852400 |
| C | -5.96665600 | -1.21147100 | -1.23044600 |
| C | -4.84871200 | -0.41680700 | -0.98407300 |
| S | 1.90005200  | 3.23840300  | -1.05425100 |
| C | 3.16397200  | 4.47761200  | -0.41220500 |
| C | -2.41161100 | 1.44960100  | -1.47398000 |
| N | -2.49680600 | 1.72249400  | -2.60900800 |
| O | 4.66805200  | -3.52842800 | -1.03956600 |
| C | 4.97511300  | -4.78898500 | -0.37945300 |
| H | 4.05544200  | -1.31454700 | -2.09846400 |
| H | 3.04227000  | -3.95097600 | 1.13684100  |
| H | 1.29260500  | -2.36702600 | 1.86938100  |
| H | 2.31596200  | 0.27097800  | -1.36227600 |
| H | 0.31026700  | 1.13506400  | -0.95512400 |
| H | -1.12034000 | 1.81188800  | 1.63814600  |
| H | -1.07964800 | 2.93965700  | 0.28083400  |
| H | -2.69164800 | 0.17432800  | 1.65518800  |
| H | -4.20496700 | -1.40886100 | 2.20467800  |
| H | -6.18423100 | -2.81444200 | 1.75934400  |
| H | -7.32242400 | -2.69377200 | -0.44790500 |
| H | -6.45934500 | -1.15119300 | -2.19155100 |
| H | -4.49903300 | 0.24474200  | -1.76053400 |
| H | 3.47954300  | 5.03955900  | -1.28626400 |
| H | 2.69519800  | 5.12604000  | 0.31965700  |
| H | 3.99778200  | 3.94559300  | 0.03244600  |
| H | 5.78774300  | -5.21603400 | -0.95647600 |
| H | 5.29935800  | -4.62434100 | 0.64966300  |
| H | 4.11601500  | -5.46204800 | -0.39761800 |

1 2 1.5 6 1.5 27 1.0  
2 3 1.5 25 1.0  
3 4 1.5 28 1.0  
4 5 1.5 29 1.0  
5 6 1.5 7 1.0  
6 30 1.0  
7 8 1.0 9 2.0  
8 10 1.0 11 1.0 31 1.0  
9  
10 13 1.0 32 1.0 33 1.0  
11 12 1.0 21 1.0  
12  
13 14 2.0 23 1.5  
14 15 1.0 34 1.0  
15 16 1.5 20 1.5  
16 17 1.5 35 1.0  
17 18 1.5 36 1.0  
18 19 1.5 37 1.0

19 20 1.5 38 1.0  
20 39 1.0  
21 22 1.0  
22 40 1.0 41 1.0 42 1.0  
23 24 3.0  
24  
25 26 1.0  
26 43 1.0 44 1.0 45 1.0  
27  
28  
29  
30  
31  
32  
33  
34  
35  
36  
37  
38  
39  
40  
41  
42  
43  
44  
45

### Optimized Coordinate\_7

---

# opt b3lyp/6-311g geom=connectivity

Pdt-CCN

0 1

|   |             |             |             |
|---|-------------|-------------|-------------|
| C | 5.27632500  | 0.25560700  | 0.84964800  |
| C | 5.16571800  | 1.16565800  | -0.21612700 |
| C | 3.93735500  | 1.35149300  | -0.86328200 |
| C | 2.82425800  | 0.62837100  | -0.43500600 |
| C | 2.91712200  | -0.28081600 | 0.62959500  |
| C | 4.16627600  | -0.45841300 | 1.26320900  |
| C | 1.75782400  | -1.06176300 | 1.09657900  |
| C | 0.37341000  | -0.71751700 | 0.58330300  |
| O | 1.86895800  | -1.95405400 | 1.96645300  |
| C | -0.29086700 | 0.40980000  | 1.35178700  |
| C | -0.20635700 | -1.45053100 | -0.37165500 |
| S | -1.93624900 | -1.25067300 | -0.96163000 |
| C | -1.56889600 | 1.00375000  | 0.70179800  |
| C | -2.63794000 | -0.08219400 | 0.40368900  |
| C | -3.97422800 | 0.43307000  | -0.06965400 |
| C | -5.13824800 | 0.08502200  | 0.63042300  |
| C | -6.38565000 | 0.56050200  | 0.22052500  |
| C | -6.48481500 | 1.38853700  | -0.89908300 |
| C | -5.33112600 | 1.73622300  | -1.60830200 |
| C | -4.08559900 | 1.25975400  | -1.19958400 |
| S | 0.69225800  | -2.78990700 | -1.27445900 |

|   |             |             |             |
|---|-------------|-------------|-------------|
| C | 0.26373500  | -4.24539300 | -0.12142600 |
| C | -2.11397000 | 2.04186700  | 1.58623700  |
| N | -2.52684800 | 2.85658800  | 2.31005300  |
| O | 6.33208500  | 1.82905300  | -0.55150900 |
| C | 6.32352400  | 2.79075700  | -1.64415800 |
| H | 6.23956000  | 0.13610000  | 1.32310900  |
| H | 3.84124500  | 2.03836700  | -1.69004900 |
| H | 1.88054500  | 0.75803400  | -0.94720600 |
| H | 4.23291300  | -1.16547300 | 2.07741400  |
| H | 0.43029400  | 1.21952300  | 1.49045800  |
| H | -0.53462400 | 0.05295600  | 2.35813300  |
| H | -1.29838500 | 1.48110300  | -0.24379100 |
| H | -2.76995200 | -0.70070000 | 1.28886900  |
| H | -5.06620100 | -0.55332000 | 1.50181700  |
| H | -7.27337100 | 0.28629100  | 0.77424500  |
| H | -7.44984700 | 1.75898700  | -1.21740400 |
| H | -5.40215100 | 2.37379200  | -2.47919900 |
| H | -3.20189800 | 1.51987000  | -1.76697300 |
| H | 0.71961500  | -5.12275400 | -0.57109300 |
| H | 0.68749500  | -4.04178000 | 0.85581700  |
| H | -0.81430500 | -4.35943000 | -0.07683400 |
| H | 7.34119200  | 3.16074600  | -1.69923100 |
| H | 6.05309300  | 2.31151200  | -2.58679200 |
| H | 5.64112800  | 3.61666100  | -1.43489600 |

1 2 1.5 6 2.0 27 1.0  
2 3 1.5 25 1.0  
3 4 1.5 28 1.0  
4 5 1.5 29 1.0  
5 6 1.5 7 1.0  
6 30 1.0  
7 8 1.0 9 2.0  
8 10 1.0 11 2.0  
9  
10 13 1.0 31 1.0 32 1.0  
11 12 1.0 21 1.0  
12  
13 14 1.0 23 1.0 33 1.0  
14 15 1.0 34 1.0  
15 16 1.5 20 1.5  
16 17 1.5 35 1.0  
17 18 1.5 36 1.0  
18 19 1.5 37 1.0  
19 20 1.5 38 1.0  
20 39 1.0  
21  
22 40 1.0 41 1.0 42 1.0  
23 24 3.0  
24  
25 26 1.0  
26 43 1.0 44 1.0 45 1.0  
27  
28  
29  
30  
31

32  
33  
34  
35  
36  
37  
38  
39  
40  
41  
42  
43  
44  
45

### Optimized Coordinate\_3'

# opt b3lyp/6-311g geom=connectivity

---

Int-CE\_Opt

|   |   |             |             |             |
|---|---|-------------|-------------|-------------|
| 0 | 1 |             |             |             |
| C |   | 4.87686400  | -0.74375800 | 0.95208200  |
| C |   | 5.96222500  | -0.03528800 | 0.41760900  |
| C |   | 5.74245900  | 0.99866800  | -0.50379900 |
| C |   | 4.44018000  | 1.31420700  | -0.87671500 |
| C |   | 3.33784900  | 0.61626200  | -0.35152100 |
| C |   | 3.58337200  | -0.42133200 | 0.56925200  |
| C |   | 1.98713900  | 1.03178300  | -0.79237700 |
| C |   | 0.71084800  | 0.32392100  | -0.24785100 |
| O |   | 1.84829600  | 1.99865700  | -1.56598100 |
| C |   | -0.54063400 | 1.03404000  | -0.86793400 |
| C |   | 0.68395000  | -1.15467800 | -0.57358600 |
| S |   | 0.89248600  | -1.73500000 | -2.14301600 |
| C |   | -1.88385500 | 0.64695700  | -0.27637000 |
| C |   | -2.69376000 | -0.24685100 | -0.87897200 |
| C |   | -4.00550600 | -0.76336800 | -0.45452400 |
| C |   | -4.87886300 | -1.25822100 | -1.44528700 |
| C |   | -6.14175300 | -1.74599400 | -1.11354600 |
| C |   | -6.55621700 | -1.76474600 | 0.22139000  |
| C |   | -5.69273100 | -1.30259000 | 1.21884300  |
| C |   | -4.42935500 | -0.81190300 | 0.88901200  |
| S |   | 0.32945600  | -2.38672100 | 0.71127100  |
| C |   | 0.27545700  | -1.49698700 | 2.39534100  |
| C |   | -2.19735400 | 1.33394100  | 1.01363400  |
| O |   | -1.55142900 | 1.12481300  | 2.04962200  |
| O |   | -3.18412800 | 2.28572900  | 1.05586100  |
| C |   | -4.71446700 | 3.95953100  | 0.27664700  |
| C |   | -3.92542500 | 2.73845300  | -0.14984200 |
| O |   | 7.21058800  | -0.43406000 | 0.86193300  |
| C |   | 8.40040700  | 0.23043200  | 0.35071400  |
| H |   | 5.07735800  | -1.54032400 | 1.65285800  |
| H |   | 6.56650900  | 1.55132800  | -0.92864200 |
| H |   | 4.25051100  | 2.10819400  | -1.58410600 |
| H |   | 2.76800100  | -0.99500200 | 0.97894100  |

|   |             |             |             |
|---|-------------|-------------|-------------|
| H | 0.69168500  | 0.47682300  | 0.83229400  |
| H | -0.37207100 | 2.10585700  | -0.76005000 |
| H | -0.53667900 | 0.82507000  | -1.93626600 |
| H | -2.33830600 | -0.64983200 | -1.82245000 |
| H | -4.55898300 | -1.25423700 | -2.47976000 |
| H | -6.79673100 | -2.11602800 | -1.89091700 |
| H | -7.53346000 | -2.14774900 | 0.48264000  |
| H | -5.99695100 | -1.33538800 | 2.25638400  |
| H | -3.76586500 | -0.49847700 | 1.68159700  |
| H | -0.09508700 | -2.26081900 | 3.07374500  |
| H | 1.27612000  | -1.19832100 | 2.69358200  |
| H | -0.40406300 | -0.65193400 | 2.37127800  |
| H | -5.29289700 | 4.34232700  | -0.56674300 |
| H | -5.40377500 | 3.70821000  | 1.08187100  |
| H | -4.04902900 | 4.74770100  | 0.62692500  |
| H | -3.20921900 | 2.96994200  | -0.93818100 |
| H | -4.57437100 | 1.93011900  | -0.48085200 |
| H | 9.23020300  | -0.26281300 | 0.84459200  |
| H | 8.48652000  | 0.10485600  | -0.73010500 |
| H | 8.39791900  | 1.29205700  | 0.60462700  |

1 2 1.5 6 1.5 30 1.0  
2 3 1.5 28 1.0  
3 4 1.5 31 1.0  
4 5 1.5 32 1.0  
5 6 1.5 7 1.0  
6 33 1.0  
7 8 1.0 9 2.0  
8 10 1.0 11 1.0 34 1.0  
9  
10 13 1.0 35 1.0 36 1.0  
11 12 1.0 21 1.0  
12  
13 14 2.0 23 1.0  
14 15 1.0 37 1.0  
15 16 1.5 20 1.5  
16 17 1.5 38 1.0  
17 18 1.5 39 1.0  
18 19 1.5 40 1.0  
19 20 1.5 41 1.0  
20 42 1.0  
21  
22 43 1.0 44 1.0 45 1.0  
23 24 2.0 25 1.0  
24  
25 27 1.0  
26 27 1.0 46 1.0 47 1.0 48 1.0  
27 49 1.0 50 1.0  
28 29 1.0  
29 51 1.0 52 1.0 53 1.0  
30  
31  
32  
33  
34  
35

36  
37  
38  
39  
40  
41  
42  
43  
44  
45  
46  
47  
48  
49  
50  
51  
52  
53

### Optimized Coordinate\_7'

---

# opt b3lyp/6-311g geom=connectivity

Pdt-CE

|   |   |             |             |             |
|---|---|-------------|-------------|-------------|
| 0 | 1 |             |             |             |
| C |   | 5.54914600  | 0.57445400  | 0.84438300  |
| C |   | 5.53408600  | 0.99243000  | -0.49782500 |
| C |   | 4.36885800  | 0.86797500  | -1.26515000 |
| C |   | 3.22298200  | 0.32726800  | -0.68259000 |
| C |   | 3.22082800  | -0.09235600 | 0.65652600  |
| C |   | 4.40695000  | 0.03872400  | 1.41114700  |
| C |   | 2.02470200  | -0.66970200 | 1.29299800  |
| C |   | 0.70019700  | -0.64331700 | 0.55680800  |
| O |   | 2.04600800  | -1.11567300 | 2.46298200  |
| C |   | -0.07036500 | 0.64999900  | 0.75885000  |
| C |   | 0.25414700  | -1.72332300 | -0.09236800 |
| S |   | -1.40566900 | -1.88545300 | -0.86718200 |
| C |   | -1.31209100 | 0.83143100  | -0.14951600 |
| C |   | -2.28801300 | -0.35884800 | -0.05100100 |
| C |   | -3.62663200 | -0.21161100 | -0.72914900 |
| C |   | -4.74806300 | -0.85271400 | -0.17571300 |
| C |   | -5.99964600 | -0.75941000 | -0.78580400 |
| C |   | -6.14890500 | -0.02303800 | -1.96378600 |
| C |   | -5.03985300 | 0.61355800  | -2.52634200 |
| C |   | -3.78665500 | 0.51780100  | -1.91851700 |
| C |   | -1.90747300 | 2.22879800  | 0.06952500  |
| O |   | -1.75145800 | 3.11020700  | -0.77389700 |
| O |   | -2.53824400 | 2.57748600  | 1.24664900  |
| C |   | -3.50580200 | 2.54180900  | 3.43290300  |
| C |   | -3.03067300 | 1.65964200  | 2.29481700  |
| S |   | 1.29353100  | -3.23632100 | -0.31701900 |
| C |   | 0.78268900  | -4.16930300 | 1.26330700  |
| O |   | 6.72574000  | 1.51393000  | -0.96828700 |
| C |   | 6.81432200  | 1.97391200  | -2.34655400 |
| H |   | 6.46592200  | 0.68426100  | 1.40454200  |

|   |             |             |             |
|---|-------------|-------------|-------------|
| H | 4.34530200  | 1.17931000  | -2.29810800 |
| H | 2.32850600  | 0.21658900  | -1.28016500 |
| H | 4.39989600  | -0.29077800 | 2.44011300  |
| H | 0.60528400  | 1.49128500  | 0.57792000  |
| H | -0.34857100 | 0.71651800  | 1.81530800  |
| H | -0.95897200 | 0.88025600  | -1.17872700 |
| H | -2.42605800 | -0.66447900 | 0.98221000  |
| H | -4.63483100 | -1.43343100 | 0.73183200  |
| H | -6.85194700 | -1.25898300 | -0.34503700 |
| H | -7.11807200 | 0.05370400  | -2.43780500 |
| H | -5.14781900 | 1.18638200  | -3.43727000 |
| H | -2.94228700 | 1.01895000  | -2.36920700 |
| H | -3.90782200 | 1.92769900  | 4.24146200  |
| H | -2.68334600 | 3.13826500  | 3.82592100  |
| H | -4.28643500 | 3.21830200  | 3.08813700  |
| H | -3.84722500 | 1.07013100  | 1.87983900  |
| H | -2.22889300 | 0.99657800  | 2.61971800  |
| H | 1.30644200  | -5.12027400 | 1.22863800  |
| H | 1.09370700  | -3.58350000 | 2.12149200  |
| H | -0.29071600 | -4.32780600 | 1.25223200  |
| H | 7.83277600  | 2.32875500  | -2.45826300 |
| H | 6.62893200  | 1.15649700  | -3.04568600 |
| H | 6.11563700  | 2.79146800  | -2.53314900 |

1 2 1.5 6 2.0 30 1.0  
2 3 1.5 28 1.0  
3 4 1.5 31 1.0  
4 5 1.5 32 1.0  
5 6 1.5 7 1.0  
6 33 1.0  
7 8 1.0 9 2.0  
8 10 1.0 11 2.0  
9  
10 13 1.0 34 1.0 35 1.0  
11 12 1.0 26 1.0  
12  
13 14 1.0 21 1.0 36 1.0  
14 15 1.0 37 1.0  
15 16 1.5 20 1.5  
16 17 1.5 38 1.0  
17 18 1.5 39 1.0  
18 19 1.5 40 1.0  
19 20 1.5 41 1.0  
20 42 1.0  
21 22 2.0 23 1.0  
22  
23 25 1.0  
24 25 1.0 43 1.0 44 1.0 45 1.0  
25 46 1.0 47 1.0  
26  
27 48 1.0 49 1.0 50 1.0  
28 29 1.0  
29 51 1.0 52 1.0 53 1.0  
30  
31  
32

33  
34  
35  
36  
37  
38  
39  
40  
41  
42  
43  
44  
45  
46  
47  
48  
49  
50  
51  
52  
53

#### Optimized Coordinate\_4

---

# opt b3lyp/6-311++g(d,p)

Int-SC1

0 1

|   |             |             |             |
|---|-------------|-------------|-------------|
| S | 1.08076000  | 0.34705400  | 0.67508200  |
| S | 0.67316300  | 2.27438200  | -1.71705200 |
| O | -1.30960000 | -0.87851700 | 1.14407300  |
| C | -2.01339200 | -0.21161300 | 0.33444000  |
| C | -0.07817700 | 1.08387700  | -0.53946300 |
| C | -3.48533300 | -0.43039800 | 0.29060900  |
| C | -4.01087200 | -1.51940600 | 1.01831800  |
| H | -3.32023700 | -2.14156200 | 1.56826100  |
| C | 4.69318300  | 0.01873900  | 1.33052700  |
| H | 5.37009000  | -0.04456300 | 2.17625100  |
| C | 3.71070400  | 0.95265700  | 1.42554600  |
| C | 5.02420000  | -0.88495700 | 0.22354200  |
| C | -1.39244200 | 0.75187700  | -0.56718200 |
| H | -2.01810800 | 1.20767000  | -1.31727900 |
| C | 4.07076300  | -1.43005600 | -0.66104000 |
| H | 3.01988600  | -1.22799600 | -0.51646900 |
| C | 6.37621000  | -1.25724300 | 0.06053000  |
| H | 7.11799700  | -0.86734600 | 0.74605500  |
| C | -6.24979100 | -0.95190400 | 0.31998200  |
| C | -5.37003800 | -1.78195400 | 1.03200700  |
| C | -4.38099300 | 0.39081200  | -0.41029100 |
| H | -4.02603900 | 1.25203000  | -0.95858200 |
| C | 2.73199100  | 1.31983700  | 0.34747500  |
| H | 3.10237300  | 1.05058900  | -0.63537600 |
| H | 2.49421000  | 2.37732500  | 0.38989900  |
| C | 4.46649400  | -2.28693500 | -1.68837200 |



|   |             |             |             |
|---|-------------|-------------|-------------|
| H | 3.71918000  | -2.70463900 | -2.34934200 |
| C | 6.76811900  | -2.10439500 | -0.97313900 |
| H | 7.81086300  | -2.36870000 | -1.08612000 |
| C | 5.81341300  | -2.61967100 | -1.85548400 |
| H | 6.11418100  | -3.28469000 | -2.65374200 |
| C | -5.75530100 | 0.14090400  | -0.40036700 |
| H | -6.41856600 | 0.79666800  | -0.94382000 |
| C | -0.79788600 | 2.86165300  | -2.74137300 |
| H | -0.37332800 | 3.58959000  | -3.42666000 |
| H | -1.22782700 | 2.03607900  | -3.29954500 |
| H | -1.53417100 | 3.34087200  | -2.10378800 |
| H | -5.78200000 | -2.61522100 | 1.58203800  |
| C | 3.61095700  | 1.71197000  | 2.63851800  |
| N | 3.52449500  | 2.34868400  | 3.61466900  |
| C | -8.57704000 | -0.49282500 | -0.30451700 |
| H | -9.52957600 | -0.96445600 | -0.08919800 |
| H | -8.58262800 | 0.53427300  | 0.06608300  |
| H | -8.39811400 | -0.49900300 | -1.38173200 |
| O | -7.59052900 | -1.29854600 | 0.39596600  |

1 5 1.0  
2 5 1.0 34 1.0  
3 4 2.0  
4 6 1.0 13 1.0  
5 13 2.0  
6 7 1.5 21 1.5  
7 8 1.0 20 2.0  
8  
9 10 1.0 11 2.0 12 1.0  
10  
11 23 1.0 39 1.5  
12 15 1.5 17 1.5  
13 14 1.0  
14  
15 16 1.0 26 1.5  
16  
17 18 1.0 28 1.5  
18  
19 20 1.5 32 1.5 45 1.0  
20 38 1.0  
21 22 1.0 32 1.5  
22  
23 24 1.0 25 1.0  
24  
25  
26 27 1.0 30 1.5  
27  
28 29 1.0 30 1.5  
29  
30 31 1.0  
31  
32 33 1.0  
33  
34 35 1.0 36 1.0 37 1.0  
35  
36

37  
38  
39 40 3.0  
40  
41 42 1.0 43 1.0 44 1.0 45 1.0  
42  
43  
44  
45

### Optimized Coordinate\_4'

---

# opt b3lyp/6-311++g(d,p)

Int-SE1\_Opt

0 1  
S -0.80744200 0.16245700 -0.21903300  
S -0.31938700 0.33185900 2.83242100  
O 1.63102300 -0.27481100 -1.40837700  
C 2.34282900 -0.19696200 -0.36745800  
C 0.39998600 0.13916700 1.15286400  
C 3.82526900 -0.30390400 -0.48939400  
C 4.35535600 -0.66762600 -1.74564600  
H 3.66160800 -0.85164600 -2.55269200  
C -4.38504000 -0.24852500 -0.84743300  
H -5.13409900 0.11566900 -1.54369600  
C -3.54696000 0.70667300 -0.37164800  
C -4.48481500 -1.67541800 -0.53294600  
C 1.73170900 -0.02234200 0.94316400  
H 2.38258600 -0.04255200 1.80207100  
C -3.39897900 -2.47846300 -0.12492300  
H -2.40480400 -2.06075700 -0.07849500  
C -5.74832900 -2.28972500 -0.67944200  
H -6.58647100 -1.69373200 -1.01752900  
C 6.60325500 -0.52795200 -0.87997700  
C 5.72127500 -0.78254000 -1.94130100  
C 4.72329800 -0.04915100 0.55740800  
H 4.36475200 0.25552100 1.53033500  
C -2.49919400 0.51504000 0.67741000  
H -2.71849400 -0.33108800 1.31927100  
H -2.36357700 1.42198700 1.25181300  
C -3.58378600 -3.83249700 0.15447800  
H -2.73584900 -4.43417300 0.45298100  
C -5.93143500 -3.63902900 -0.38713900  
H -6.91050600 -4.08575400 -0.49694000  
C -4.84831500 -4.41584000 0.03579900  
H -4.98532300 -5.46632100 0.25484200  
C 6.10417800 -0.15636100 0.37293900  
H 6.76827100 0.05280000 1.19800300  
C 1.18804200 0.25944000 3.96353200  
H 0.77891400 0.37851200 4.96273700  
H 1.68207100 -0.70348100 3.87963300  
H 1.86737000 1.07720400 3.74371800  
H 6.13630600 -1.06437700 -2.89786700  
C 8.93872100 -0.42085000 -0.13911400

|   |             |             |             |
|---|-------------|-------------|-------------|
| H | 9.89746400  | -0.59661100 | -0.61469400 |
| H | 8.88719100  | 0.61066800  | 0.21564500  |
| H | 8.81191700  | -1.10895900 | 0.69935700  |
| O | 7.95169300  | -0.66942800 | -1.17635200 |
| C | -3.74592600 | 2.07330200  | -0.92234400 |
| O | -4.54539400 | 2.37894800  | -1.81948700 |
| C | -3.03056900 | 4.40229800  | -0.80648700 |
| C | -2.04348100 | 5.21780600  | 0.00262200  |
| H | -2.79793000 | 4.39731200  | -1.87077900 |
| H | -4.05842500 | 4.74285900  | -0.68414500 |
| H | -2.06274100 | 6.25830600  | -0.32832200 |
| H | -2.29297200 | 5.19122100  | 1.06343300  |
| H | -1.03083900 | 4.83582400  | -0.12290400 |
| O | -2.94353200 | 3.00944800  | -0.31200700 |

1 5 1.0  
2 5 1.0 34 1.0  
3 4 2.0  
4 6 1.0 13 1.0  
5 13 2.0  
6 7 1.5 21 1.5  
7 8 1.0 20 2.0  
8  
9 10 1.0 11 2.0 12 1.0  
10  
11 23 1.0 44 1.0  
12 15 1.5 17 1.5  
13 14 1.0  
14  
15 16 1.0 26 1.5  
16  
17 18 1.0 28 1.5  
18  
19 20 1.5 32 1.5 43 1.0  
20 38 1.0  
21 22 1.0 32 1.5  
22  
23 24 1.0 25 1.0  
24  
25  
26 27 1.0 30 1.5  
27  
28 29 1.0 30 1.5  
29  
30 31 1.0  
31  
32 33 1.0  
33  
34 35 1.0 36 1.0 37 1.0  
35  
36  
37  
38  
39 40 1.0 41 1.0 42 1.0 43 1.0  
40  
41

42  
 43  
 44 45 2.0 53 1.0  
 45  
 46 47 1.0 48 1.0 49 1.0 53 1.0  
 47 50 1.0 51 1.0 52 1.0  
 48  
 49  
 50  
 51  
 52  
 53

### Optimized Coordinate\_6

---

# opt b3lyp/6-311++g(d,p)

Pdt-SCN

|     |             |             |             |
|-----|-------------|-------------|-------------|
| 0 1 |             |             |             |
| C   | 0.96556600  | 0.64407200  | 0.31731000  |
| C   | 1.15993300  | 1.77652700  | -0.37322400 |
| S   | 2.69390000  | 2.14705900  | -1.33227300 |
| C   | 3.84602300  | 1.02635500  | -0.33552200 |
| C   | 3.28274600  | -0.40355500 | -0.35260600 |
| C   | 1.93063000  | -0.54751400 | 0.42445400  |
| C   | -0.18410100 | 0.50014900  | 1.30302400  |
| O   | 0.12773800  | 0.47171700  | 2.51615300  |
| C   | -1.57719700 | 0.33491600  | 0.86131200  |
| C   | -2.59199900 | 0.26917800  | 1.84134000  |
| C   | -3.91671900 | 0.10482900  | 1.47999400  |
| C   | -4.26163200 | -0.00626900 | 0.12221400  |
| C   | -3.27005100 | 0.04628000  | -0.86535000 |
| C   | -1.93875200 | 0.21731400  | -0.48867600 |
| S   | -0.06808800 | 3.15700900  | -0.44191100 |
| C   | -6.07083000 | -0.29065500 | -1.51025000 |
| C   | 4.26770200  | -1.34409300 | 0.19809000  |
| N   | 5.06600600  | -2.06647500 | 0.64450100  |
| C   | 1.24366800  | -1.86322200 | 0.04548800  |
| C   | 1.04584200  | -2.86118700 | 1.00790400  |
| C   | 0.43595300  | -4.07111700 | 0.66414400  |
| C   | 0.01665800  | -4.29715400 | -0.64780900 |
| C   | 0.20682000  | -3.30587100 | -1.61567000 |
| C   | 0.81412100  | -2.09795200 | -1.27029800 |
| O   | -5.61179300 | -0.16831200 | -0.13497600 |
| C   | 0.86406900  | 4.46054100  | 0.58240700  |
| H   | 4.81158900  | 1.08143300  | -0.83019700 |
| H   | 3.92313200  | 1.42243600  | 0.67363300  |
| H   | 3.11909800  | -0.67629000 | -1.39727800 |
| H   | 2.17183200  | -0.60368300 | 1.48943600  |
| H   | -2.30796800 | 0.35213400  | 2.88027600  |
| H   | -4.70628200 | 0.05781300  | 2.21531700  |
| H   | -3.51962800 | -0.04278400 | -1.91146400 |
| H   | -1.17776700 | 0.25501400  | -1.25392500 |

|   |             |             |             |
|---|-------------|-------------|-------------|
| H | -7.14678800 | -0.40406500 | -1.43747000 |
| H | -5.83207000 | 0.60578000  | -2.08551600 |
| H | -5.63881000 | -1.16981800 | -1.99203700 |
| H | 1.36913400  | -2.69111400 | 2.02640600  |
| H | 0.29335600  | -4.83267600 | 1.41892200  |
| H | -0.45221800 | -5.23455600 | -0.91519800 |
| H | -0.11660500 | -3.47361900 | -2.63451000 |
| H | 0.95187000  | -1.33500700 | -2.02713300 |
| H | 0.26256000  | 5.36275100  | 0.52003400  |
| H | 0.93909000  | 4.12166300  | 1.60995800  |
| H | 1.84318100  | 4.62815000  | 0.14710200  |

1 2 2.0 6 1.0 7 1.0  
2 3 1.0 15 1.0  
3  
4 5 1.0 27 1.0 28 1.0  
5 6 1.0 17 1.0 29 1.0  
6 19 1.0 30 1.0  
7 8 2.0 9 1.0  
8  
9 10 1.5 14 1.5  
10 11 2.0 31 1.0  
11 12 1.5 32 1.0  
12 13 1.5 25 1.0  
13 14 1.5 33 1.0  
14 34 1.0  
15  
16 25 1.0 35 1.0 36 1.0 37 1.0  
17 18 3.0  
18  
19 20 1.5 24 1.5  
20 21 1.5 38 1.0  
21 22 1.5 39 1.0  
22 23 1.5 40 1.0  
23 24 1.5 41 1.0  
24 42 1.0  
25  
26 43 1.0 44 1.0 45 1.0  
27  
28  
29  
30  
31  
32  
33  
34  
35  
36  
37  
38  
39  
40  
41  
42  
43  
44

**Optimized Coordinate\_6'**

---

# opt b3lyp/6-311++g(d,p)

Pdt-SE\_Opt

0 1

|   |             |             |             |
|---|-------------|-------------|-------------|
| C | 0.22639300  | 0.95991900  | 0.13201300  |
| C | 0.16207900  | 2.16833000  | -0.44365700 |
| S | 1.47197300  | 2.88494900  | -1.52376200 |
| C | 2.90052800  | 1.80461000  | -0.90553900 |
| C | 2.50114900  | 0.32551700  | -0.99240000 |
| C | 1.37739900  | -0.05253000 | 0.01219500  |
| C | -0.76869200 | 0.55221700  | 1.20569400  |
| O | -0.34282300 | 0.52733800  | 2.38407600  |
| C | -2.14192200 | 0.13780500  | 0.87446200  |
| C | -3.01060800 | -0.22563400 | 1.92637100  |
| C | -4.30652000 | -0.63397200 | 1.66712400  |
| C | -4.76731600 | -0.69323600 | 0.34113900  |
| C | -3.92090000 | -0.34198400 | -0.71753500 |
| C | -2.61766100 | 0.07054900  | -0.44291800 |
| S | -1.25158900 | 3.33701800  | -0.19016300 |
| C | -6.64795000 | -1.20191600 | -1.14902100 |
| C | 0.85953200  | -1.46821400 | -0.26746200 |
| C | 0.90590800  | -2.44385200 | 0.73802500  |
| C | 0.44695500  | -3.74185700 | 0.49683900  |
| C | -0.06435300 | -4.08262900 | -0.75661900 |
| C | -0.11832900 | -3.11685100 | -1.76596800 |
| C | 0.33729400  | -1.82051800 | -1.52179300 |
| O | -6.07778300 | -1.11442400 | 0.18640500  |
| C | -0.41473600 | 4.55440200  | 1.00845400  |
| H | 3.73353800  | 2.03244700  | -1.56622200 |
| H | 3.14050400  | 2.10161300  | 0.11125600  |
| H | 2.18037000  | 0.12275400  | -2.01234200 |
| H | 1.83214200  | -0.07201200 | 1.00576500  |
| H | -2.63745700 | -0.17619700 | 2.93896200  |
| H | -4.98557400 | -0.91292300 | 2.45930100  |
| H | -4.26079900 | -0.38446600 | -1.74090100 |
| H | -1.96813900 | 0.34151100  | -1.26217000 |
| H | -7.66527200 | -1.54577200 | -0.99792800 |
| H | -6.65662700 | -0.22570600 | -1.63745400 |
| H | -6.10251800 | -1.92110600 | -1.76314200 |
| H | 1.29289500  | -2.18040000 | 1.71359700  |
| H | 0.48883200  | -4.48131000 | 1.28562600  |
| H | -0.41715600 | -5.08757600 | -0.94615800 |
| H | -0.51255800 | -3.37290600 | -2.74056500 |
| H | 0.28797300  | -1.08322000 | -2.31308400 |
| H | -1.13881600 | 5.34631100  | 1.17697200  |
| H | -0.18733600 | 4.03905800  | 1.93544300  |
| H | 0.48189500  | 4.95274300  | 0.54576200  |
| C | 3.72914600  | -0.54361100 | -0.78265700 |
| O | 4.30975000  | -1.17263500 | -1.66889900 |
| C | 5.38335000  | -1.29345800 | 0.85572600  |

|   |            |             |            |
|---|------------|-------------|------------|
| C | 5.68800500 | -1.02869000 | 2.31518200 |
| H | 5.16902900 | -2.34238800 | 0.65413300 |
| H | 6.18684500 | -0.97462100 | 0.19268700 |
| H | 6.57583000 | -1.58865900 | 2.61602400 |
| H | 5.87685600 | 0.03069700  | 2.48777100 |
| H | 4.85746800 | -1.33687100 | 2.94975600 |
| O | 4.16953400 | -0.50763500 | 0.51888900 |

```

1 2 2.0 6 1.0 7 1.0
2 3 1.0 15 1.0
3
4 5 1.0 25 1.0 26 1.0
5 6 1.0 27 1.0 44 1.0
6 17 1.0 28 1.0
7 8 2.0 9 1.0
8
9 10 1.5 14 1.5
10 11 2.0 29 1.0
11 12 1.5 30 1.0
12 13 1.5 23 1.0
13 14 1.5 31 1.0
14 32 1.0
15
16 23 1.0 33 1.0 34 1.0 35 1.0
17 18 1.5 22 1.5
18 19 1.5 36 1.0
19 20 1.5 37 1.0
20 21 1.5 38 1.0
21 22 1.5 39 1.0
22 40 1.0
23
24 41 1.0 42 1.0 43 1.0
25
26
27
28
29
30
31
32
33
34
35
36
37
38
39
40
41
42
43
44 45 2.0 53 1.0
45
46 47 1.0 48 1.0 49 1.0 53 1.0
47 50 1.0 51 1.0 52 1.0
48

```

49  
50  
51  
52  
53

## **References**

1. The crystallographic coordinates have been deposited with the Cambridge Crystallographic Data Centre; deposition nos. CCDC 2096630 (**6i**) and CCDC 2099427 (**6l**). These data can be obtained free of charge from The Cambridge Crystallographic Data Centre via [www.ccdc.cam.ac.uk/data\\_request/cif](http://www.ccdc.cam.ac.uk/data_request/cif).
2. Frisch et al. GAUSSIAN 09, REVISION D.02, Gaussian, Inc., Wallingford, CT, 2010.
